# Supplementary material
Source: ML conference proceedings conference paper supplement (https://openreview.net/forum?id=nrbR2F29vU)
Supplement: supplementary_material [file 3. cd3cd28+aktinhib.xls]

## Sheet: Sheet1
praf	pmek	plcg	PIP2	PIP3	p44/42	pakts473	PKA	PKC	P38	pjnk
14.6	18.6	3.16	5.67	19.1	21.3	33.1	308	1	1.65	4.29
17.2	39.6	4	14.9	23.7	23.1	34.3	328	1.15	5.42	2.81
15.8	15.1	2.33	213	24.6	18.1	26.2	286	25.7	44.1	3.11
9.39	14.7	1.12	1	1.01	8.51	28.4	1165	1.06	12.9	4.37
9.82	6.04	4.37	17.2	16.8	13.9	18.9	461	6.32	10.5	4.83
9.65	10.6	1	253	42.9	10.1	18.9	770	3.19	1.01	13.1
33.7	19.6	19.6	28.6	8.2	7.7	8.98	533	24.8	44.9	12.5
18.8	19.6	7.99	215	3.72	4.91	19.3	1241	9.82	7.43	13.8
39.2	17.2	7.23	200	33.4	11.5	17.9	407	14.9	19.8	18.4
16.1	15.4	7.17	114	32.5	18.3	28.1	167	14.6	23.1	19.6
46.6	12.2	4.7	157	32.2	9.82	20.2	1334	3.08	1	1.96
50.9	24.1	2.5	202	30.5	6.1	11.8	1275	1	1.63	1.02
28.6	20.2	7.04	195	12.4	23.7	40	557	3.89	20.9	30.2
13.1	40	5	29.4	38.5	13.1	17.2	262	6.21	12	6.21
48.7	22.5	8.82	93.9	48.3	32.5	50.5	1310	1.04	6.85	85.8
37.2	19.5	36.8	352	158	7.77	21.3	692	10.6	17.5	27.6
11.3	6.21	14.2	23.7	12.5	26.7	36.8	340	17.3	41.8	44.1
47.8	18.1	14.1	157	22.7	8.2	16.5	219	1	1	9.73
17.5	29.4	6.32	113	12.7	10.4	23.1	400	10.5	21.9	2.25
38.2	20.5	10.2	93.9	16.4	28.4	50	422	1.43	1.3	4.07
2.55	12.4	5.52	122	42.9	18.9	42.2	965	2.81	17.9	74.3
52.8	21.3	12.4	86.6	35.2	14.1	25.7	717	5.09	7.77	4.37
41.8	45.3	3.72	241	28.1	7.57	11.4	661	13.2	23.7	12.6
67.3	24.8	11.7	704	93.9	22.7	40.7	365	6.21	11	16.1
13.7	10.1	13.1	48.7	30	19.3	28.4	644	3.25	1.96	7.84
15	39.6	24.4	55.7	30.2	24.6	28.9	163	1.25	6.15	4.03
21.9	18.3	7.77	9.56	19.3	11.3	25.9	461	1.37	1	8.82
67.9	40	24.4	64.4	4.26	58.8	87.4	533	6.44	35.2	54.2
10.2	13.5	13.8	233	51.9	17.3	49.6	1715	7.1	19.8	28.9
15.8	22.1	12	17.9	78.4	2.21	10.7	799	8.98	19.5	11.3
85.1	106	9.56	14.1	51.9	30.8	43.3	319	24.8	79.9	69.2
57.8	16.5	15.4	40	135	16.7	25.5	382	4.07	5.62	10.3
9.56	24.4	5.67	17.8	28.4	9.65	12.1	533	9.47	17.6	12
27.9	27.4	3.79	1.01	9.22	8.13	20.5	487	6.1	20.9	52.3
17.8	17.2	2.02	202	19.3	13.2	13.2	692	1.45	6.44	2.69
34.9	15	7.17	176	47	10.7	18.6	453	30	48.3	22.7
75.7	17.6	1.43	340	29.7	7.23	21.7	644	11.5	21.1	2
38.5	16	1	806	106	2.74	13.1	441	8.98	15	1.51
34.3	36.5	21.7	183	48.7	16.7	19.5	449	7.91	11.7	5
20.4	15.7	10.2	229	54.7	29.4	61	414	4.18	5.52	2.15
22.5	19.5	8.2	31.6	51.4	32.5	40.3	474	5.83	15	1.01
73	24.1	14.1	29.2	31.1	35.2	75	730	8.9	16.3	70.4
34	10.8	4.18	35.2	4.96	32.2	46.1	343	3.11	1.07	5.67
50	25.5	9.73	10.9	30	31.6	38.9	217	1	1	13
48.7	25.5	11.3	77	23.5	3.92	13.1	396	7.91	54.2	349
61	25.5	8.74	99.1	37.9	6.92	22.7	1554	1	1	4.53
64.4	33.4	51.9	418	124	19.1	34.9	255	42.9	74.3	20.4
65.5	29.7	6.61	17	28.9	13.3	29.4	1104	10.5	27.9	163
43.7	13.3	3.92	231	16.4	20	38.5	322	3.52	2.5	10.3
33.4	23.3	2	31.1	15.4	23.1	40.3	337	18.8	35.2	6.21
13.5	10.7	18.3	27.4	8.51	1	2.5	14.2	3.92	12.7	83.5
11.7	4.37	6.61	153	26.4	37.9	118	947	48.3	102	145
12.5	19.3	33.1	322	294	35.2	51.4	231	8.9	15.3	13.9
84.3	35.2	8.13	153	24.1	5.57	17.6	547	6.67	6.92	17.5
38.2	15.8	9.22	188	36.2	9.65	33.4	799	1	1	6.92
28.1	9.22	12.1	11.1	55.2	45.7	139	1310	19.6	27.4	24.8
11.7	8.74	13	14.3	45.7	31.1	56.7	1065	1.6	13.2	4.7
1	3.46	8.58	231	41.4	25.5	29.2	429	30.8	126	239
136	48.7	20.9	692	178	29.2	45.3	965	9.91	19.6	10.5
19.5	13.8	16.4	528	150	2.86	1	147	11	5.78	13.9
42.9	12.4	58.8	191	101	22.5	38.9	764	14.1	15.4	21.1
5.28	5.57	4.91	8.51	1.11	10.1	38.5	1762	24.6	63.8	85.8
79.1	50.5	50	328	129	9.31	16.1	588	1	1	6.61
81.3	16.8	15.5	61.5	18.6	8.58	15.7	235	1	1.53	10.1
32.2	26.9	3.4	231	33.7	69.8	110	820	18.3	26.2	12.6
40	20	7.04	33.7	15.3	17.3	30.2	483	11.4	15.4	17.2
19.6	20.2	13.3	172	41.8	21.7	38.9	505	1	1	5.62
50.9	28.1	27.6	284	79.9	24.1	41	514	3.75	1	3.05
41.4	27.1	39.2	59.4	61.5	17.5	42.6	487	18.3	39.2	5.78
58.8	31.9	19.1	37.9	49.6	63.2	112	914	15.3	22.3	5.52
64.9	21.1	6.49	143	44.1	34	66.1	655	22.1	26.7	4.45
62.1	32.8	24.4	225	40.7	10.8	18.4	319	34	41.4	24.8
32.2	28.1	31.3	429	193	7.43	26.2	466	8.82	23.3	10.6
63.8	64.4	4.33	163	34.6	8.51	11.4	610	5.57	10.7	9.47
22.1	26.7	10.4	126	7.43	24.6	42.9	322	1.7	19.6	10.2
63.2	38.9	76.4	349	105	31.9	37.5	302	1	3.85	2.64
132	54.7	15.5	25	17.9	11	21.3	557	7.43	18.6	15.1
26.9	24.4	8.28	85.8	12.3	15.8	27.9	528	6.44	9.91	17.9
39.2	17.6	1.73	5.62	6.21	16.1	32.8	757	15.1	12.6	11.8
42.9	17.6	8.2	204	59.9	6.85	34	1568	8.28	26.7	1.15
101	100	16.1	9.73	44.9	34.3	49.6	217	8.9	14.2	6.44
73	23.1	5.88	221	34.3	14.3	26.2	426	9.14	3.43	8.2
25.5	23.5	20.7	34.9	50.9	44.1	71	604	7.04	41.4	319
33.7	16.8	12.3	131	44.1	28.6	42.6	279	6.49	16.8	12.2
205	71	4.53	17	47.4	13.8	37.9	1794	13.7	23.3	62.6
24.1	28.1	15.1	217	41	48.7	135	1055	10.7	16.3	9.47
34	21.3	25	655	112	19.6	21.1	276	2.71	21.3	109
57.3	23.5	31.9	322	58.8	19.8	35.5	835	21.5	33.1	16.1
55.2	22.3	10.1	150	28.6	6.38	15.1	422	14.6	18.6	1.84
77	21.1	2.33	7.17	3.13	38.5	119	1472	13.6	15.5	11.3
59.4	41.4	68.5	175	44.5	70.4	100	407	9.06	15.5	9.65
9.39	27.9	43.3	202	110	9.65	30.5	679	8.74	13.2	8.98
16.5	33.4	7.7	120	46.1	14.1	27.6	414	7.1	5.99	13
61	40.7	8.51	142	25.5	22.9	40.3	255	5.83	1.91	10.6
63.8	34.9	1	241	19.8	7.99	18.8	1124	17.2	31.1	3.31
45.7	12.1	4.18	186	21.1	15.8	20.2	311	10.7	10.9	16.1
39.2	10	12.1	38.5	48.7	20.4	30	284	20.9	20.7	8.98
120	85.8	6.67	13.1	35.9	22.7	46.1	453	40.3	77	37.2
5.78	1.01	2.21	538	38.9	16.8	15.4	461	5.38	11.9	9.22
35.2	10.4	46.1	289	89	1.86	6.44	161	18.6	29.2	19.8
19.6	46.6	43.7	88.2	39.6	20.7	37.9	281	8.9	10.7	1.04
34	18.8	8.43	97.3	56.7	11.7	31.1	533	2.62	12.7	1.45
47.4	28.9	6.38	241	34.9	10.3	13.6	1009	33.4	54.7	15.8
44.1	28.4	14.1	48.3	43.7	60.4	119	1459	1.1	1.7	5.73
119	29.4	1.54	1.26	13	9.22	22.1	1186	15.5	25.5	11.4
53.8	23.9	16.4	79.1	59.9	41.4	63.8	1114	17.2	22.1	14.6
164	72.3	10.6	196	50	25.9	37.9	519	10.4	17.6	1.75
42.2	22.3	14.5	340	63.8	5.28	10.6	382	10.8	9.22	8.51
71	66.7	4.07	9.82	23.5	15.3	17.9	583	16.5	25.5	7.04
59.9	32.8	11.4	151	17.5	20.7	25.3	186	22.7	36.8	3.96
41.4	28.9	21.3	16.5	84.3	29.2	64.9	3398	1.32	48.3	6.26
25.9	19.3	50.9	698	204	10.3	28.6	757	8.82	3.05	2.67
78.4	44.1	44.1	153	51.9	63.8	138	1155	9.91	13.8	9.56
47	57.3	3.55	13.6	20	19.6	32.5	349	20	35.2	12.9
17.3	28.9	15	16.5	4.74	8.98	37.2	710	12.7	4.83	8.13
53.3	19.8	5	21.5	40	3.34	16.1	1999	4.53	39.2	67.9
20.5	15	9.56	75	17.8	15.5	21.3	777	17.2	20.2	8.28
55.2	27.4	3.65	12.5	57.8	32.2	44.1	233	4.7	13.1	12.4
84.3	23.1	6.1	227	40.7	75	114	2072	7.7	19.1	10.8
135	198	4.87	215	27.4	16.4	61	2393	10.6	18.1	3.49
25.3	17.5	16.5	30.8	17.6	11.8	25.3	599	5.47	11.3	6.15
42.6	23.3	11.2	137	11.2	17	34.9	505	12.2	20.7	7.04
71	40.7	17	136	10.1	76.4	122	2247	15	23.5	8.74
62.6	26.4	17.2	244	62.1	10.6	17.2	505	13	35.2	18.1
51.4	25.5	47	172	139	38.5	54.7	1298	3.11	17.8	18.9
63.8	24.6	2.41	5.88	13.5	10.6	16.7	533	9.91	18.3	1
73.7	34.9	30	84.3	41.8	145	375	2350	14.2	12.1	2.53
46.6	19.3	3.4	1.01	1.15	17.8	40.3	355	11.5	13.9	5.19
45.7	14.9	15.4	429	58.8	5.42	22.1	204	14.2	21.1	25.3
86.6	36.5	6.15	111	23.1	50	75.7	1000	16.3	25	11.9
30.5	23.1	19.8	64.9	26.2	11.3	22.7	322	1	11.7	15.4
35.2	9.14	25.7	18.6	33.7	45.7	74.3	710	17.8	38.2	28.6
211	88.2	11.9	157	24.4	45.7	94.7	1715	14.1	7.5	13.6
43.7	21.5	5.28	302	28.6	36.2	88.2	1963	18.8	25.7	10.1
19.5	13.8	7.17	22.3	37.5	12.2	34.9	644	19.3	32.5	12.4
118	64.4	10.4	129	3	6.73	14.9	466	3.37	2	1.6
64.4	24.8	10.8	153	35.9	111	231	1144	9.82	18.9	6.1
43.7	26.7	31.9	66.1	18.9	18.6	31.9	382	12.4	19.3	10.9
81.3	39.6	54.7	231	107	6.49	20	1065	19.6	20.2	8.66
58.8	28.1	6.98	18.3	50.5	13.8	22.7	257	14.3	27.6	43.3
21.7	18.6	29.2	414	168	5.73	15.3	382	34	68.5	43.3
62.1	27.1	8.35	115	27.1	18.8	33.7	843	1.11	38.5	1.81
24.6	25.5	14.7	81.3	43.7	73.7	184	1554	15.8	27.4	12.1
6.1	21.3	69.8	125	196	10.9	44.5	1322	13.8	5.94	8.82
154	86.6	9.14	189	35.5	20.4	36.8	621	10.5	14.9	11.8
73.7	34.9	4.78	22.1	56.7	11.7	33.7	743	22.1	32.5	13.6
70.4	37.5	42.9	136	59.4	36.8	75	538	25.5	27.6	9.47
77	26.4	13.7	500	75.7	11.8	36.5	487	19.5	23.3	9.22
11.8	22.5	9.39	122	12.9	37.2	54.7	667	9.39	14.5	3.68
18.1	22.7	19.6	392	143	17.6	38.9	679	11.3	11.9	13.5
32.5	25.7	12.9	308	72.3	33.4	75.7	1486	7.99	17.9	130
49.6	46.1	10.3	453	66.1	17.5	23.1	389	20.4	22.3	10.2
41.8	23.9	5.83	514	69.8	4.41	13.3	157	13.1	23.9	7.37
20.5	32.5	11.1	289	64.9	19.8	34.3	337	15.3	8.58	10.3
58.8	17.5	9.73	9.47	27.4	27.9	50.5	557	19.1	25	10.4
41.4	26.4	3.08	24.4	19.6	30.2	48.3	385	8.58	8.51	8.13
34.9	16.5	15.8	153	41.4	4.74	9.91	939	10.2	6.61	8.98
20	19.1	24.4	578	97.3	10.7	26.9	835	7.04	13.8	5.33
179	27.9	4.26	146	45.7	18.6	32.2	528	3.62	1.86	6.98
51.9	30.2	3.46	271	48.7	23.3	40	422	11.4	35.2	17.3
92.2	69.8	55.2	375	130	69.8	111	1018	1	6.73	5.52
48.3	15.7	4.78	13.6	24.8	3.65	15.5	191	1	1	8.06
85.1	27.9	1.36	158	6.67	16.4	34	410	44.9	75.7	26.9
36.5	19.8	10.8	237	23.5	46.1	62.6	1407	20	32.5	12.7
73.7	27.6	20.5	19.6	21.1	26.7	62.6	1334	20.2	36.5	6.79
19.3	27.4	34.3	445	49.1	19.3	42.9	685	36.2	63.2	30.8
28.9	21.7	4.53	22.7	7.5	4.49	21.9	1055	10.8	14.7	12.4
50.9	120	9.56	44.5	14.2	50	89.8	710	22.1	26.9	14.1
73	28.6	8.28	6.79	25.3	26.2	30.5	289	11.2	18.9	9.31
62.1	27.1	6.98	13.1	59.4	36.8	49.1	791	39.6	77.7	52.8
34.9	24.8	16.8	188	53.3	10	12.1	491	23.1	25.5	10.7
66.1	63.8	16	138	26.7	16	34.9	505	12	3.68	14.6
26.9	17.3	12.7	90.6	20	10.1	27.6	410	8.43	9.47	17.2
78.4	21.1	9.06	264	53.3	157	331	1843	11.3	17.3	13.5
37.5	31.1	6.44	284	34.6	18.6	34.6	557	24.4	12	7.17
55.2	10.8	4.18	45.3	21.3	30.2	58.8	470	11.2	8.06	13.2
55.7	24.8	7.57	496	55.7	16.4	42.2	441	21.1	36.8	8.82
49.1	18.4	10.3	53.3	11.7	14.5	30.2	433	9.47	17.2	9.31
61.5	21.1	6.61	14.5	30	10.2	15	343	10.6	18.6	15.1
3.37	11.7	20.9	58.3	46.1	26.9	42.6	400	1.7	5.47	2.76
181	93.9	7.1	22.1	66.7	45.3	64.4	906	8.58	11.1	3.85
16	25.7	7.99	143	6.1	23.3	47.8	991	1	2.33	1
27.1	41.8	10	117	23.3	34.9	50.5	365	1	16.4	11
131	72.3	6.04	193	52.8	11.9	23.9	313	6.85	7.77	11.5
65.5	31.1	17.2	124	7.37	100	305	2148	34.3	46.6	13.7
6.61	18.8	28.4	67.3	86.6	5.33	25.7	1640	1	5.09	9.73
27.6	18.6	1	292	4.74	2.35	2.97	1	8.28	13.6	14.6
71	38.9	9.56	181	41.8	38.5	109	717	12.5	12.6	10.7
98.2	36.8	1.81	28.9	16.7	24.8	42.6	362	17.2	32.2	13
50.5	23.5	6.98	12.2	38.9	28.6	64.4	1046	31.1	48.3	13.3
112	47.8	9.31	528	183	10.9	27.1	528	13.1	14.6	5.78
83.5	54.2	1.84	4.53	15.3	6.98	18.9	764	22.9	25.9	2.17
33.4	24.6	12.1	164	34.9	47.8	85.8	2329	23.7	43.7	26.2
106	47.8	8.06	9.39	38.9	11.7	23.1	604	11.5	12.2	9.91
25.3	40	4.14	155	27.6	12.4	19.8	710	8.9	18.4	9.31
10.8	19.5	10.1	164	47.8	18.3	31.9	372	24.4	35.2	7.3
3.16	4.26	19.5	32.2	40	4.7	48.3	509	24.4	29.2	14.7
79.9	34	13	209	50.9	11.3	24.4	487	16.4	18.6	11.9
93.1	44.9	57.8	500	136	41	76.4	2227	20	25.3	9.14
37.5	18.3	16.3	1.15	9.22	13.5	25.3	362	6.85	20.9	24.8
35.9	16.1	20.5	50.9	82	21.1	28.9	349	8.9	26.7	4.57
107	30	12.5	200	20.7	7.91	53.8	2072	13.3	33.7	2.57
102	32.5	7.64	246	59.4	29.2	44.5	319	15.3	14.2	10.4
32.8	26.7	11.9	196	50.5	12.5	17.3	542	27.1	30	7.84
100	27.1	34.6	396	103	64.4	124	1540	20	31.9	12.4
90.6	58.3	14.1	305	26.7	33.7	60.4	1104	1	7.5	6.38
100	25.7	77.7	246	37.2	8.06	8.74	509	15.8	28.6	40
75.7	29.7	7.5	149	29.2	37.2	58.8	334	7.99	22.7	8.28
53.8	20.7	59.4	337	223	13.2	31.1	533	29.7	40.7	12.1
90.6	44.5	6.04	170	21.7	16.3	25.9	685	13.6	14.7	8.2
69.8	47.4	11.1	372	18.9	4.61	26.4	632	13.2	25	9.56
193	61	9.31	15.8	29.7	10.4	24.8	667	12.7	21.7	6.61
85.8	22.3	16.8	66.7	36.8	25.3	51.9	547	25.9	31.9	17.9
67.9	14.9	80.6	237	61	37.5	66.7	2666	15.3	39.6	12.4
19.1	9.82	12	10.7	27.4	72.3	90.6	858	9.65	17.3	20.5
16.1	15.3	13.9	73	24.6	16.8	30.2	385	15.4	25.9	23.5
95.6	28.9	7.64	14.2	23.7	13.2	30.8	730	14.5	34.9	41.8
49.1	21.3	1.83	297	49.6	24.4	46.6	1827	33.1	38.2	17
18.9	26.2	24.8	264	69.8	31.1	93.9	1134	12.9	9.65	10
74.3	36.5	5.42	244	33.7	12.2	20.7	235	5.83	25	120
25.7	24.6	19.5	117	79.1	10	25.7	799	17.2	26.2	15.8
61	31.1	15.8	145	41.8	27.9	45.7	359	14.6	13.9	5.78
27.1	16.4	37.9	552	80.6	20.9	40.3	407	10.7	19.6	12.2
151	48.7	36.8	89	76.4	21.9	38.9	382	11.4	18.6	6.92
179	77	13.3	250	42.2	28.4	47.4	491	16	9.82	9.22
154	136	17.2	42.6	78.4	4.29	23.5	1000	17.3	12.4	5.88
73.7	36.2	3.43	3.25	1.01	7.37	16.1	1263	17.3	11.3	18.3
95.6	42.9	40.7	40.3	58.3	8.9	16.7	523	15.8	15.4	7.04
55.2	51.4	18.1	82.8	20.4	10.6	21.3	828	8.58	26.4	6.44
36.5	10.5	23.3	211	28.6	11.3	49.6	2618	12	20.4	2.89
30.5	15.7	15.7	141	27.6	15.5	20.4	343	5.78	18.4	10.8
158	37.2	15.8	90.6	28.9	5.28	12.1	914	5.73	18.6	10.3
49.6	31.9	5.83	305	38.9	19.6	23.1	271	21.9	28.9	5
89.8	35.9	22.7	644	111	3.55	2.97	28.6	9.91	20.7	1.78
35.9	18.1	9.56	117	27.4	8.74	15.7	667	10.6	21.3	7.7
67.9	28.9	11.3	69.2	27.6	54.2	94.7	1155	11.5	17.9	11.9
89	31.6	15	32.8	41.8	27.4	43.7	379	9.73	11.3	1.01
57.8	21.7	36.2	588	118	27.4	43.7	418	14.6	26.9	5
85.1	38.2	17.8	313	46.1	121	255	1625	11.8	13.6	8.74
24.8	21.5	4.7	94.7	23.1	15.4	16.1	325	21.7	37.5	10.3
63.8	19.6	4.49	227	27.1	13.2	13.7	433	11.3	21.7	12.9
78.4	33.1	12	274	20.4	27.1	34.3	279	22.5	36.2	6.44
73.7	32.8	51.9	528	157	25.5	60.4	1084	9.14	12	7.43
117	40.3	1.43	13.5	55.2	17.8	30.8	500	18.9	24.1	12.3
117	78.4	18.4	57.8	16.4	7.64	28.9	638	1.64	13.2	3.82
34.3	20.5	16	23.9	48.7	21.5	68.5	1114	16.4	8.51	9.31
179	34.6	26.2	29.7	15.5	6.73	62.6	1176	23.5	28.1	5.73
106	39.2	17.9	101	38.2	49.6	93.1	1420	15.5	31.6	11.9
39.2	17.8	26.2	426	106	110	172	1197	8.98	13.2	15.4
71.7	25.7	5.73	246	48.3	16	79.9	1346	13.6	20.7	3.31
13.9	21.1	15.3	235	45.3	24.1	29.4	322	15.1	7.57	4.26
91.4	80.6	4.7	191	44.5	48.7	69.2	379	16	33.1	15.5
50.5	13.6	10.6	114	19.8	18.1	28.4	407	1	5.83	1.78
34	15.7	9.73	227	33.4	24.6	43.3	583	13.1	22.5	19.5
48.7	19.5	22.3	121	43.3	110	328	1114	25.5	22.5	19.6
84.3	34.6	27.1	85.1	47	8.58	20.7	632	13.2	13.8	3.25
44.5	18.1	10.6	145	41.8	10.8	29.2	207	12	22.5	4.29
31.3	21.3	7.5	1	1018	4.66	14.7	461	9.47	16.8	14.9
79.1	59.4	10.7	158	36.5	10.9	34	644	19.1	26.9	9.22
42.6	21.7	19.1	219	22.1	21.5	56.2	1395	10.2	9.56	12.6
51.4	38.9	25.7	20	7.7	32.5	72.3	1186	16.5	31.6	12.5
63.8	51.4	10.2	40.3	25	46.1	98.2	1526	13.3	17.2	6.85
14.2	18.4	54.2	385	215	17	27.6	583	10.8	14.1	12.4
42.9	20.4	5.78	213	24.4	110	316	1843	10.7	19.8	9.56
26.4	17.2	11.2	204	39.6	43.7	74.3	1134	31.3	45.7	10.9
6.21	4.87	4.29	221	14.9	28.4	47.4	400	15.5	22.1	7.17
31.6	20.7	4.91	274	34.6	20.2	66.1	3820	23.9	23.3	6.26
78.4	25.7	10.7	466	46.6	11.8	17.6	334	8.06	17.2	18.6
30	9.31	28.6	131	56.7	41.4	89.8	2308	18.8	27.9	5.78
50.5	18.8	7.04	18.4	24.4	15.4	25	271	19.5	30.5	9.14
23.9	20	2.67	3.59	11.3	16.7	26.9	316	17	25.9	11.2
73.7	23.3	7.17	21.3	18.9	15.5	23.7	588	16.4	13.1	6.73
11	14.7	19.1	53.8	32.8	16	18.9	542	20.4	17.8	24.6
65.5	25.3	15.1	117	23.9	18.6	23.3	474	11.3	16.3	8.35
21.7	8.2	14.6	202	23.5	18.3	30.5	496	16	24.8	11.9
63.8	18.4	9.22	322	51.4	21.7	84.3	1486	12.1	23.3	8.58
104	60.4	7.84	158	36.8	23.5	41.8	340	7.43	16.5	12.4
25.7	18.4	6.04	334	32.8	79.9	125	1124	14.1	9.65	4.07
17.3	21.7	10.6	217	41.8	13.1	22.9	487	32.2	36.2	9.14
8.43	36.8	10.1	418	45.3	14.2	25.9	717	5.19	26.4	54.7
57.8	16.5	11.5	235	32.5	24.8	31.9	437	8.28	28.4	23.7
91.4	104	7.77	145	61	70.4	138	982	20	31.6	6.04
79.9	36.5	10.7	16.3	37.2	8.51	21.1	777	18.8	38.2	133
81.3	32.5	21.9	59.4	38.5	9.06	23.3	400	10	23.1	3.79
107	30.5	17.9	241	66.7	5.28	18.9	362	21.3	28.6	14.5
99.1	36.2	2.84	15.8	28.1	21.9	49.1	1252	22.9	25.5	10.4
93.9	45.3	21.3	25.3	28.6	12.6	31.1	478	6.73	20.4	1.6
38.9	18.4	16.1	422	68.5	20.9	40	519	9.47	23.3	1
78.4	20.9	5.14	255	30.8	22.1	36.5	392	20	38.2	6.15
33.1	26.4	10.4	24.4	31.6	31.3	52.8	410	14.7	12.1	9.39
60.4	22.5	14.9	106	31.1	62.6	84.3	1009	14.2	7.91	2.84
70.4	23.1	15.4	145	39.6	67.9	106	1275	21.7	32.2	2.76
51.9	29.4	10.7	113	37.5	34	58.8	692	7.91	2.37	9.47
93.9	27.4	9.39	32.2	57.8	31.1	76.4	1334	16.7	25.7	3.13
93.9	30.2	9.56	322	48.3	14.5	24.4	931	1.18	5.78	9.14
33.1	9.31	14.6	311	54.2	10.5	30.5	1540	23.7	47	9.39
37.9	19.6	17.2	91.4	25.9	31.1	44.9	562	3.02	18.3	15.1
45.3	27.9	26.4	136	51.4	8.58	21.7	457	29.2	41.4	13.1
105	80.6	7.91	229	42.2	5.42	22.9	1370	10.8	19.8	1.29
75	31.9	12.4	119	33.1	31.9	39.6	407	32.5	26.4	10.1
98.2	21.5	12	389	49.1	14.1	24.4	820	18.3	62.1	29.7
78.4	24.8	8.98	111	44.5	8.58	19.3	1018	8.82	16.8	8.35
147	31.1	11.5	129	56.7	47.4	147	1731	4.91	4.29	21.3
14.5	13	8.74	21.5	27.4	5.83	38.9	1208	29.7	63.2	57.8
121	33.7	22.3	225	72.3	112	217	1370	1.64	24.1	3.79
89.8	32.8	17	23.7	34.9	37.2	49.6	461	22.9	29.2	9.91
31.3	13.1	15.5	153	27.1	15.4	20.9	352	8.9	13	4.61
27.9	17.8	11.5	167	22.5	4.66	19.8	1018	27.1	38.9	16.7
59.9	16.4	25.5	813	106	23.5	54.2	882	19.3	29.4	7.04
44.5	20.7	9.14	125	20.2	10.2	22.9	331	19.5	17	9.47
85.1	22.9	23.5	235	78.4	33.7	58.8	491	8.13	6.1	5.23
191	84.3	1	743	25	30.8	44.1	939	18.6	22.1	3.02
106	22.9	14.1	470	86.6	20.9	34.3	542	10.9	20.5	6.61
40.3	19.6	17	79.9	39.2	33.7	114	2480	23.1	34.9	11
55.7	49.6	8.98	142	29.2	20	42.9	698	14.3	15.1	11.2
45.3	29.2	23.7	18.8	17.5	33.1	57.8	578	3.82	7.1	6.38
108	79.9	18.9	35.9	17.8	5.42	8.35	66.7	13.3	29.4	13.5
108	51.4	13.5	168	24.6	6.44	17	437	15.5	27.6	5.94
59.9	19.1	11.4	184	34.6	19.3	61	1310	7.17	10.8	10.4
69.8	22.3	15.8	35.2	9.56	9.56	31.6	965	14.6	28.4	8.98
85.1	27.6	17.9	168	12.5	15.3	38.9	519	26.9	36.5	7.7
120	48.3	26.2	322	102	8.43	16.3	679	31.1	38.5	11.8
151	44.5	41.8	63.2	75	16	24.6	403	31.3	29.2	25.5
120	99.1	11.5	59.9	25.9	29.2	44.5	346	25	38.5	6.44
131	115	10.3	135	55.2	9.91	19.8	599	12.3	9.39	14.7
133	57.3	15	223	44.9	14.3	23.3	385	16	25.7	13.3
106	35.5	21.1	209	42.6	24.6	88.2	3960	13.5	15	1
22.9	17.9	10.2	85.8	53.8	52.8	86.6	813	10.8	10.1	2.33
35.9	16.8	10.8	165	30.5	12.6	12.3	248	9.73	13.3	10.5
47	44.9	15.7	26.2	41	15.7	30	389	20.9	23.1	11.3
38.9	26.9	26.9	31.6	47	26.7	61	1144	17.5	34	1
54.7	28.4	12.6	250	30.5	24.6	35.2	389	13.1	32.8	11.5
46.6	20.4	34.3	262	63.8	11.3	23.7	255	13.2	20.5	4.26
78.4	32.8	9.65	200	49.6	23.9	31.9	211	13.8	14.2	11.4
49.1	24.8	10.9	28.9	20	41	78.4	1009	13.3	23.7	10.3
59.4	18.3	16.8	28.9	11.8	34.6	46.1	375	17.8	23.9	14.3
109	38.2	4.1	198	25.3	6.32	8.66	791	31.9	37.5	4.29
78.4	76.4	5.78	2.23	1.12	5	10.8	594	18.1	17.6	13.8
39.2	12.3	13.2	129	32.5	10.5	27.4	644	43.3	70.4	17.5
89	34.9	7.57	294	50.9	4.83	19.1	649	40.3	65.5	23.3
74.3	17.8	13.1	21.9	24.6	6.85	21.3	661	10.9	15.1	2.69
47.4	22.9	26.7	30.5	37.2	3.75	26.2	281	14.3	37.9	2.71
60.4	24.8	13.3	18.6	53.3	9.06	31.3	500	22.7	15.3	7.77
80.6	20.9	21.9	15	2.13	26.7	37.5	414	12.7	17.5	5.19
21.5	18.1	11.9	28.9	12.7	12.3	21.9	305	6.32	2.48	7.91
189	61	32.8	85.1	87.4	4.66	10.9	947	14.1	13.1	1.84
31.6	16.8	39.6	340	85.8	49.6	84.3	1446	16	19.8	8.82
115	36.8	1	433	38.5	6.1	23.1	528	16.5	30	6.98
114	59.4	19.6	10.3	105	36.5	75.7	1075	2.37	2.29	8.98
17.9	25.3	12.1	64.4	25.3	13.3	26.9	422	12.6	27.4	4.78
39.2	14.5	12.6	274	53.8	10.4	10.8	717	15.4	31.3	13.7
126	142	19.1	163	15.1	26.9	38.9	583	1.72	13.1	12.3
35.9	22.7	18.4	95.6	16	23.5	45.3	382	22.5	28.6	16.5
207	56.7	13.9	137	13.3	53.3	122	1197	21.7	39.2	14.5
62.1	27.6	23.5	49.6	38.5	24.4	57.3	947	20.5	10.6	14.6
101	39.2	6.21	207	21.9	18.8	28.1	365	20.2	31.6	13.2
15.1	14.7	6.32	8.28	16.4	17.2	22.9	407	15.1	22.9	4.07
105	105	11.4	142	45.7	15.5	35.2	649	2.79	1.01	3.28
62.6	33.4	11.7	119	44.5	24.6	52.8	2969	13.8	21.7	4.66
30.5	27.9	24.6	34.9	13.6	12.7	67.9	123	12.2	15.1	9.47
5.99	19.3	7.57	215	35.2	30	31.9	297	16.8	18.6	6.26
8.82	4.96	25.5	7.77	42.6	21.1	31.1	396	54.7	147	69.8
37.2	20.9	11	143	29.2	2.81	25.7	704	27.6	34.6	8.98
16.3	9.47	9.47	25.7	24.8	12.4	22.9	271	30.8	31.1	17.2
24.6	35.9	7.64	87.4	16.3	9.91	17.5	851	17.5	18.3	10.9
75.7	21.1	27.9	82.8	47.8	22.5	35.5	246	25.7	43.7	10.4
80.6	34	11.1	737	73	38.2	66.7	340	4.29	6.32	22.5
33.1	11.2	15.8	154	23.1	31.1	61.5	764	17.6	21.9	14.2
33.4	15.7	21.5	23.1	6.61	4.1	27.6	583	20.5	23.7	10.5
34.3	16.4	17.6	56.2	47	5.99	10.6	215	42.9	68.5	18.1
44.9	20.4	9.14	173	43.7	7.99	13.1	426	29.7	46.6	15.3
36.5	16.3	9.91	157	45.3	9.65	11.5	626	2.86	1	10.6
138	39.2	29.7	38.5	27.9	17.2	31.6	478	11.8	24.6	7.37
68.5	34.6	10.7	207	52.8	13.8	22.9	313	17.6	12.4	9.47
13.7	7.5	27.1	51.9	36.5	15.4	37.2	991	48.3	51.9	13.6
75.7	44.9	14.2	143	36.8	3.31	34.9	1208	18.3	32.8	10.7
35.9	36.8	11.2	135	81.3	15	24.8	764	12.7	34.3	17.6
69.8	28.6	8.58	15.8	37.2	8.35	22.7	437	31.3	48.7	49.1
68.5	39.6	3.79	19.1	29.7	7.77	18.8	289	3.79	3.75	25.3
38.9	16	12.1	131	35.2	9.73	25.5	362	19.5	23.5	12.7
35.2	29.7	28.1	56.7	14.1	15	20	638	14.2	23.5	13.8
29.7	20.2	7.7	125	36.2	6.55	15.7	500	18.9	25	4.87
61.5	23.9	18.3	87.4	17.5	19.8	25.9	255	34.6	50	12.6
129	42.9	17.3	62.6	41	34.9	72.3	621	8.43	16	5.73
91.4	27.6	1.03	172	7.3	34.6	40.7	407	16.5	24.8	15.8
66.7	23.7	14.5	186	44.1	20	37.2	437	20.5	31.3	6.92
79.1	31.1	44.5	147	77.7	13.5	16.7	567	13.9	12.6	16.3
61	42.6	4.61	1.5	5.09	9.22	21.3	523	3.75	2.11	7.3
51.9	16.8	9.39	188	26.9	4.91	10.5	259	5.33	1	10
13.7	9.82	14.2	165	23.5	26.2	32.8	385	12.4	20.9	14.9
22.5	14.2	6.67	276	31.3	19.8	58.3	1499	2.07	5.42	11.1
46.1	21.9	11.3	18.4	88.2	11	18.4	667	28.4	38.9	13.5
13.7	25.9	29.4	42.9	32.2	14.1	67.3	429	2.89	1.58	1.26
27.4	14.1	16.5	71.7	11.8	17.9	52.8	882	15.8	18.1	25
73.7	30	21.1	262	87.4	31.9	52.8	286	18.9	17.2	4.29
17.2	21.9	20	57.8	34	16	30.5	523	37.9	58.3	23.3
59.4	20.7	4.1	328	25.5	2.89	2.21	81.3	18.3	32.5	9.47
67.3	30.2	36.5	311	62.6	16	32.5	470	23.5	32.8	16
39.2	18.9	43.3	362	79.9	5.09	18.9	583	14.5	22.5	9.56
67.9	31.3	13.8	52.3	30.8	20.2	31.6	279	5.28	17.2	4.49
52.3	45.7	19.3	239	29.4	12.5	38.2	813	17.9	28.9	5.47
89	38.2	12.4	211	36.2	23.1	81.3	1134	19.5	18.3	15.8
54.2	20.7	24.8	717	108	13.9	99.1	1252	51.4	58.3	13.7
51.9	58.8	9.91	107	12.7	12.1	35.2	973	18.9	27.9	11.3
31.3	10.4	10.5	107	37.9	18.9	34.3	426	15.3	8.06	3.02
69.8	34.6	19.8	34.3	17.9	1.78	1.01	76.4	28.6	48.7	28.1
28.9	29.4	7.64	193	54.2	21.7	27.9	426	20.7	30.5	9.14
95.6	49.1	14.1	259	50	54.7	113	1486	29.4	49.6	9.73
47.4	21.7	7.99	132	15.3	12.5	31.1	346	3.31	2.41	2.76
61.5	40.7	7.77	22.7	37.9	15	32.2	441	8.51	31.3	9.47
40.7	25	7.04	3.75	20.2	18.6	27.9	433	46.6	58.3	17
46.1	29.7	31.3	737	155	6.1	23.9	1568	34.3	47.8	20.5
32.8	19.1	53.3	145	96.5	12	23.1	542	23.3	34	4.78
93.9	23.3	14.2	47.8	45.7	12.2	48.3	3051	12.9	24.4	7.7
67.3	33.4	67.9	418	138	16	24.6	403	18.1	24.4	3.96
37.2	11.8	4.37	18.1	31.3	41.4	77.7	1263	20.9	38.5	11.2
38.2	22.5	17.5	445	136	3.08	12.7	784	19.5	33.7	15.8
20.7	22.7	15.5	112	19.6	48.3	122	1446	15.4	17	19.5
13.6	13.7	5.47	5.94	14.6	26.4	53.3	1486	19.1	38.2	8.28
173	193	10.7	289	55.7	27.1	47.8	1568	20.9	32.2	6.73
14.7	18.6	63.2	193	54.7	34	64.4	661	25.3	40.7	1.31
75	25	10.6	181	42.9	6.15	22.9	1611	16.4	29.4	11.2
85.8	67.3	10.6	189	40.3	14.7	28.6	331	3.02	1.31	13.5
87.4	44.5	9.31	21.9	43.3	2.76	11.8	843	17.2	34.9	13.6
38.2	24.4	7.17	217	29.7	13.6	25.3	491	30.8	42.6	23.1
38.2	24.1	17	92.2	38.9	25.7	36.2	644	2.07	28.9	65.5
40	12.2	6.21	202	22.7	78.4	121	1186	28.1	34	13.7
77.7	20.9	19.8	18.4	11.5	16.7	38.2	422	25	22.3	21.1
74.3	29.7	1.43	211	34.3	13.5	27.6	403	1.93	3.52	6.55
41.8	20.2	43.7	346	114	17.8	47	1625	36.5	81.3	79.1
49.1	22.1	13.7	126	23.1	10.9	32.2	491	20.7	23.5	9.47
50	27.1	18.8	81.3	41	11.3	31.1	562	22.9	21.3	1
29.2	45.7	18.1	160	18.8	14.5	16.5	437	17.9	34.3	13
80.6	36.8	1	453	67.9	12.1	33.7	552	17.2	16.5	4.33
65.5	32.2	7.43	13.7	9.39	14.9	28.1	604	17.5	28.1	4.41
179	55.7	16.3	80.6	27.6	4.49	18.9	1208	30	32.2	14.1
34	24.1	10.3	173	41	10.2	23.1	385	22.5	28.4	10.5
55.7	35.5	51.4	204	43.3	12.4	14.2	392	1.46	2.07	13.7
80.6	36.5	1.38	108	16	10.5	21.9	500	20.7	24.1	11.9
31.3	32.8	13.9	188	36.5	8.66	26.2	750	18.3	33.7	8.74
49.6	32.2	47.8	487	94.7	21.7	32.2	542	19.8	41	12.6
167	79.1	13.5	24.1	14.7	21.5	29.2	414	1	1	7.04
71.7	50.9	48.7	93.1	55.7	9.91	28.4	505	12.2	11	1.86
66.1	47.4	24.8	126	49.1	23.5	49.6	673	1	10.6	2.71
52.8	14.6	13.5	149	45.3	15.5	25.5	385	21.9	22.5	15.3
123	27.4	8.74	274	23.5	35.2	142	1894	26.9	47.4	4.57
47.4	22.5	6.67	264	29.4	5.57	26.9	914	13.5	21.9	17.9
21.5	18.1	1.01	698	55.7	21.9	33.7	457	21.5	20.7	6.55
42.2	13.5	23.5	35.2	26.4	17.6	35.5	638	22.1	32.2	8.74
9.65	16.1	15.1	237	25	13.5	25	300	22.7	17.3	1.88
28.9	21.5	40.3	368	111	22.1	34.6	372	20.4	29.2	6.04
93.9	44.5	12.9	217	25.9	18.3	39.2	418	20.9	25.3	7.57
69.8	20.9	10.8	160	35.9	7.37	13.6	453	37.9	35.9	16.3
41.8	14.6	33.7	491	103	36.5	60.4	319	26.7	24.6	7.43
12	21.3	20.2	81.3	17.2	10.1	24.8	461	27.1	39.2	9.22
31.1	23.9	9.82	179	34.9	64.4	143	1009	17.3	20	4.41
62.1	30.2	13.3	205	20.9	47.8	73	1037	25	29.2	1.75
14.9	16.8	11.9	107	47	16.5	48.7	567	21.7	33.1	8.9
34	23.3	10.6	198	28.4	15.1	30	898	17.6	21.3	10.3
69.2	19.3	9.47	289	25.7	10.5	15.8	414	18.1	16.4	13.2
50.9	20.7	7.91	143	18.4	36.8	83.5	1018	44.9	65.5	24.6
38.9	27.1	4.66	6.44	13.2	11.5	39.2	461	16	20	7.23
88.2	24.4	12	225	55.2	25.7	76.4	1407	38.2	51.4	12.6
107	54.2	22.3	104	1	11.5	18.3	523	21.5	24.4	8.74
54.7	27.4	14.3	233	43.3	5.62	12.2	588	21.1	27.1	8.28
10.4	4.57	8.43	106	30.2	5.23	21.5	1186	21.7	40.3	10.7
59.9	8.28	11.4	51.4	22.9	51.9	99.1	1065	19.8	34.9	23.9
101	25.3	10.8	56.7	36.2	30.2	110	1700	13.6	30	10.5
14.6	28.9	7.1	53.3	5.99	7.91	17.2	445	8.51	29.4	15.4
143	67.3	11.2	704	95.6	2.71	20.2	661	14.3	22.5	1.01
96.5	29.7	5.67	126	21.9	37.2	53.8	1009	26.4	38.9	12
103	89.8	13.3	167	44.1	18.3	23.3	500	1	1.04	10.6
36.5	17.9	10.1	92.2	26.7	35.9	53.3	322	34.6	49.6	11.2
66.7	81.3	19.5	213	121	5.83	6.79	279	17	40	50.5
64.4	35.2	21.5	17.6	1.49	25.5	34.3	325	24.1	37.5	14.1
110	34	2.44	4.83	1275	23.5	27.9	505	21.5	23.5	14.7
23.1	30.2	10	403	75.7	23.7	36.5	389	19.6	33.7	6.55
145	32.5	18.1	106	30.8	4.03	15.5	791	30.2	40.3	13.5
48.7	17.3	7.04	32.8	91.4	20.7	42.6	340	44.9	64.4	18.4
18.8	13.3	4.37	352	17.9	8.51	20.2	509	3.55	1.01	1.2
64.4	31.1	3.13	209	26.2	28.4	33.7	305	25.7	31.6	19.5
35.2	19.1	13.3	204	20	7.77	10.6	466	5.78	16	6.79
29.7	22.9	29.7	49.1	28.6	12.5	13.7	784	17	14.9	10.2
52.8	14.2	12.4	132	33.1	42.6	98.2	750	24.8	44.1	29.4
34	17.8	20.9	248	33.4	4.78	13.5	743	26.7	36.5	15.3
42.9	14.5	14.1	50.9	24.4	32.5	50.5	346	20.9	34.9	4
33.4	27.4	53.8	57.3	32.5	44.1	94.7	1860	13.5	29.7	15.7
111	38.2	16.1	264	65.5	25	33.1	437	1	3.85	5.14
84.3	30.2	13.5	170	41.8	11.1	25	437	22.7	35.5	10.8
37.9	20.9	12.9	89	19.5	29.4	38.5	204	38.2	46.1	11.8
64.4	34.3	7.99	235	24.1	22.5	37.5	311	20.2	22.7	9.06
44.5	22.1	1.43	308	28.6	22.5	102	1000	28.1	37.9	8.06
36.8	20.7	24.1	46.6	1.26	15	28.1	578	21.5	30	10.6
111	42.9	6.73	231	30.5	26.9	28.1	331	16	21.7	8.98
42.6	16.3	2.27	271	17.9	9.06	23.7	538	27.1	41	14.2
12.5	32.2	6.92	244	26.9	10.8	22.5	368	7.37	15.8	13
28.1	30.5	2.69	239	15.8	6.21	19.3	791	20	42.6	3.13
83.5	75	14.9	184	28.4	23.5	42.2	429	32.8	41	11.9
87.4	39.2	55.7	300	112	16.1	39.2	2167	14.6	15.1	3.22
29.4	29.7	17	319	54.7	33.1	45.3	382	18.3	18.6	8.13
49.1	22.5	10.3	164	40.7	17.3	27.1	418	22.7	23.3	7.5
122	85.1	46.1	215	45.7	20.5	35.9	578	26.9	22.7	11.1
28.1	17.8	1.88	225	21.3	18.6	33.7	294	31.3	40.7	20.7
19.3	17.3	5.14	12	21.5	12.5	30.2	483	17.9	23.5	14.5
3.65	10.9	15.4	57.3	17	6.92	20.5	470	2.79	1.01	4.29
25.5	1.25	15	229	59.9	14.5	25.3	269	27.4	35.9	27.6
31.3	22.7	25.9	311	47	64.4	135	2436	22.5	29.7	15
16.7	5.38	9.31	158	51.9	5.42	20.9	973	18.3	29.7	7.5
71.7	19.5	45.7	474	108	38.2	149	1459	26.9	41.4	9.47
37.5	10.3	6.15	153	30	17.6	31.3	445	17.8	20.7	14.7
3.46	1.47	19.6	73	28.6	52.3	118	1670	8.82	16.4	7.7
34.9	21.3	25.9	1176	196	31.1	42.2	311	20.7	24.8	10.9
23.9	17.8	3.28	1.72	4.33	30.2	50	281	20.7	27.4	2.69
26.4	29.2	3.46	429	41	24.8	31.9	414	17.2	31.1	11.9
17.3	15.8	19.8	241	58.8	49.6	81.3	1241	1.49	5.78	5
73.7	25.3	5.19	178	35.2	8.06	39.2	1075	23.5	40	13.5
64.9	23.5	13	246	31.6	23.7	61	457	17.2	34.3	9.82
53.8	14.5	46.1	97.3	66.7	15.1	22.7	362	22.7	16.4	4.37
49.6	23.7	5.99	20.5	27.9	11.4	14.1	382	15.3	29.7	7.1
1.35	8.82	8.98	157	33.4	38.2	160	1499	25.9	36.8	12.5
50.9	15.1	7.1	75.7	47.8	3.02	13.6	667	22.5	34	5.47
24.8	9.65	19.1	340	62.6	55.7	246	1046	41.4	47.4	13.2
86.6	26.2	11.2	119	21.7	5.99	16.3	685	28.9	33.7	14.9
34.9	11.5	25.5	322	72.3	17.2	42.2	610	16.3	24.6	12
60.4	16.5	6.61	165	17	12.7	49.1	3718	25.5	37.5	16.7
54.2	27.4	19.5	308	56.2	31.9	55.2	906	16.1	43.3	15.3
58.3	28.6	16.5	127	39.6	4.78	15.8	604	4.33	14.5	1.45
65.5	16.8	10.2	57.3	16.4	22.3	40	297	25.9	38.2	10.1
67.3	20.7	5.33	567	64.9	35.5	80.6	991	15.4	19.1	10.1
109	31.9	22.3	154	40.7	12.3	20.4	615	20.4	37.5	14.9
127	68.5	9.65	5.57	34.9	13.6	36.2	478	19.3	23.5	9.39
115	37.9	21.5	68.5	25.3	17	38.2	276	21.1	31.1	5.78
21.3	13.5	36.5	62.1	48.3	8.82	30.5	382	30.8	39.6	2.02
14.5	18.9	5.52	10.6	11.9	29.7	46.1	514	1.07	37.2	5.09
56.7	23.7	7.23	124	37.2	30.2	57.8	286	21.3	33.7	3.68
26.4	19.6	1.83	9.91	9.91	20.7	48.7	947	20.2	24.1	4.22
9.39	6.04	34.6	87.4	28.1	19.6	31.9	294	29.4	36.8	11.9
13.1	17.2	4.78	19.1	64.4	10.8	18.3	375	15.5	26.4	2.71
63.2	28.1	25.7	80.6	55.2	15.7	20.2	547	20.9	34.3	9.22
48.3	23.3	8.82	130	14.1	13.9	25.7	375	23.7	26.9	14.1
31.6	16.7	14.1	37.2	3.92	11.8	30	400	25.7	31.9	19.8
31.9	24.6	14.2	163	23.3	37.2	84.3	1554	3.59	1.18	7.5
41	17.5	14.2	202	36.2	54.7	89.8	1540	21.1	33.4	7.57
16.8	17.8	5.78	126	33.1	13.8	20.9	284	31.1	42.2	12.6
44.5	12.5	5.47	112	27.6	8.9	15.5	396	11.7	20.4	6.21
1	10.7	1.01	1.51	5.33	12.3	57.3	2072	14.1	32.5	10.7
19.6	5.67	1	286	25.3	37.9	66.7	820	36.8	49.6	13.2
26.7	18.9	2.53	21.1	22.1	8.43	15.4	349	18.8	23.3	9.22
34	25	8.66	154	35.5	28.9	37.5	483	28.9	43.7	13.5
74.3	35.9	13.5	172	51.4	5.83	24.4	319	27.9	40.3	11.9
44.5	44.5	4.07	319	31.6	23.1	44.5	723	1.35	3.75	8.66
23.9	29.7	12.3	95.6	18.8	6.38	18.4	259	16	31.1	14.1
22.3	34.6	5.28	334	32.2	73	173	1346	23.5	56.7	173
118	24.1	8.06	207	61.5	19.8	50	478	18.9	35.5	10
109	38.5	8.58	126	21.5	10.1	21.7	426	24.1	28.1	18.9
73.7	20.7	6.98	453	57.8	20.5	44.5	644	21.3	32.8	11.4
25.9	23.1	10.3	155	18.3	17.5	18.3	368	31.1	41.4	4.41
75.7	34.3	22.1	186	92.2	40.3	95.6	965	16.5	20	8.58
37.9	6.73	2.33	269	42.2	23.3	40.7	449	43.7	60.4	16.5
41.4	21.7	11.8	64.4	16	19.5	22.5	311	21.1	39.6	4.33
90.6	29.4	17.5	18.4	3	34.9	41	655	20.4	25.3	11.3
19.1	40.7	23.3	108	58.3	9.91	42.6	1459	17	28.6	11.5
63.2	36.2	13	209	23.7	6.85	16.5	947	31.1	40.3	14.2
75	31.6	27.6	308	52.8	86.6	154	1018	16.4	26.2	2.69
36.8	24.4	8.28	20	34.6	3.89	12.4	313	2.21	1.15	4.33
42.6	14.7	11.3	24.6	39.6	4.83	22.5	1526	25.5	31.9	6.32
41.4	34.3	14.9	178	39.6	27.6	42.9	294	31.3	34.6	4.83
20.2	17.8	9.06	178	36.5	11.7	29.4	673	1	10.7	10
13.2	9.14	17.2	147	34.9	21.7	40.3	673	25.5	33.7	18.3
18.3	11.3	17.2	141	44.1	71	114	1124	27.4	27.6	11.3
11.9	4.53	7.57	172	38.2	10.8	18.4	414	2.35	9.47	10.8
53.8	25.5	27.6	211	56.2	33.7	57.8	500	18.6	22.7	10.4
10	10.2	12.9	52.8	9.06	39.6	100	1046	23.5	42.9	16.8
58.3	32.8	25	8.82	42.2	5.73	45.3	528	30.2	39.6	3.96
94.7	50	17.8	316	55.7	49.6	98.2	2148	18.1	37.2	6.55
27.4	21.5	8.98	11.3	31.9	43.3	65.5	649	27.1	42.2	8.9
37.2	15	56.7	154	84.3	35.9	175	1999	22.3	36.5	14.1
153	107	13.1	160	32.8	9.39	20	533	1.98	4.14	11.7
51.9	10.3	14.5	271	54.2	8.13	12.5	362	27.6	35.9	11.4
78.4	25.9	1	382	33.1	20.2	43.3	1124	3.79	19.1	26.4
69.8	24.4	8.82	207	30.2	21.5	32.5	385	23.7	37.2	15
106	45.3	11.1	165	44.5	12	25.3	352	9.39	40	45.7
204	75.7	21.7	179	57.8	4.57	19.3	359	17.9	24.4	6.49
53.3	21.3	9.14	141	40.3	56.2	122	1009	1.43	1.01	1.21
44.9	22.1	7.3	39.6	25.9	3.89	12.6	594	25.7	37.2	11.9
38.2	16	5.88	53.8	6.92	21.9	54.2	673	21.5	22.5	3.05
8.2	9.91	25.5	111	32.2	21.3	36.8	343	38.5	57.8	7.64
93.9	46.1	6.67	126	28.4	27.6	41.4	352	1	6.92	7.91
32.8	18.4	13.7	168	33.7	11.3	33.4	835	28.9	45.3	13.7
80.6	40.7	17.5	120	53.3	11.1	20.4	331	23.5	26.4	5.78
7.57	23.5	16.7	141	32.2	10.8	17.2	673	26.2	48.3	8.13
28.9	19.1	5.78	573	93.9	19.6	30	213	23.1	25.3	6.92
9.82	7.43	20.4	100	8.58	40.3	97.3	1084	22.3	29.2	13
93.9	38.9	12.5	143	32.5	22.1	40	253	32.8	35.5	15.7
40.3	24.8	5.73	14.3	47.4	20.5	27.1	392	24.8	34.3	16.3
35.9	34.9	6.44	264	42.2	22.9	35.2	346	47.8	81.3	21.5
66.1	27.9	6.15	284	51.4	61	91.4	514	26.2	29.4	12
41.8	19.5	18.9	271	71.7	19.6	35.5	382	8.13	12.2	57.3
20.9	27.6	4.96	267	35.9	24.4	38.5	547	24.1	27.4	6.38
16.4	8.9	2.04	429	55.2	36.8	74.3	500	31.6	30.2	9.06
59.4	32.2	2.81	239	12.2	4.87	14.2	193	21.1	34	7.17
32.8	17.2	35.5	418	97.3	28.1	43.7	375	10	9.47	9.39
44.9	20	1.81	10.1	19.6	17.6	30.5	340	21.7	31.3	12.7
81.3	16.7	5.88	239	19.5	25.7	69.2	1685	33.1	46.6	8.13
136	71	21.7	53.8	31.9	17.5	28.4	375	30.5	38.2	12.1
23.5	16.3	17.6	18.6	8.28	23.3	42.6	233	10.8	40.7	21.5
57.8	15	28.6	385	154	4.22	33.4	1165	34.3	46.1	8.58
40.7	16.1	27.9	74.3	18.9	10.3	14.9	433	29.7	30.2	11.1
45.7	15.4	12.9	145	18.6	23.5	26.9	257	28.6	28.9	10.8
6.73	20	52.3	311	151	11.2	23.5	547	17.8	26.4	5.19
125	123	11.4	279	15.1	30.2	29.2	340	20.9	15.5	2.19
85.1	33.4	45.7	362	69.8	23.1	50.5	292	28.4	52.8	16.1
186	165	1.61	239	1.38	23.3	40.7	474	45.3	111	55.2
52.3	38.9	6.04	25.3	14.9	16.1	30.5	337	34	59.4	8.74
96.5	30.2	14.5	191	82	5.28	8.13	441	22.7	31.1	10.8
28.9	16.8	9.73	165	33.7	12.5	32.8	874	25.9	34.9	2.97
105	40.3	8.66	246	30.8	37.9	63.2	1124	20	27.9	8.9
149	36.5	26.9	45.7	44.9	18.3	34.3	237	16	26.7	1
21.5	6.67	9.22	126	20.4	42.6	63.8	276	29.2	35.5	8.58
50.5	38.5	15	205	36.8	28.1	47.8	259	15.7	25.7	27.4
100	48.7	10.6	164	8.82	23.3	40.3	355	2	6.1	4.37
80.6	31.3	18.8	110	37.9	26.2	48.7	289	15.5	37.2	11.7
56.7	26.7	13.7	125	20.5	8.82	27.6	542	20.7	20.7	7.99
81.3	28.1	13.5	313	26.2	21.1	40.3	276	33.7	44.5	7.04
44.9	22.9	22.7	170	30.2	6.92	19.6	276	47	58.3	7.1
97.3	33.7	11.3	96.5	35.5	19.3	31.6	340	27.6	31.6	8.43
61	31.9	43.7	12	46.1	33.7	48.7	389	32.8	37.5	14.5
64.4	33.1	7.7	204	34.9	16	29.2	250	25.5	31.1	6.67
120	40.7	27.6	69.8	58.3	117	172	1811	1.79	3.49	15.7
20.7	6.61	48.3	523	130	17	44.5	337	20.5	23.1	10.2
31.1	15.1	45.3	75.7	47	12.7	31.9	470	18.4	40	6.21
25.5	28.1	9.39	13.8	61.5	27.9	68.5	1433	19.1	32.2	23.9
69.8	23.7	14.2	41	44.9	9.06	29.7	1877	29.2	28.9	4.66
5	18.6	13.3	167	52.3	50.9	233	3134	45.7	55.7	20.5
72.3	41.4	7.3	37.5	4.22	6.32	25.5	1811	1	6.73	8.43
40.3	27.1	1	858	9.06	17.3	34.6	195	16.5	28.6	9.91
7.99	29.4	9.91	89.8	31.1	60.4	93.1	538	17.2	22.7	8.2
67.3	25	23.5	4.07	28.1	50.9	89	1018	17.5	22.5	9.82
59.9	19.5	33.4	115	50.5	6.73	11.2	343	24.6	32.2	6.21
37.9	19.6	13.9	119	43.7	15	54.7	528	33.4	37.2	11.2
73	37.9	13.2	18.8	34.6	13.6	58.8	1018	21.3	27.9	9.47
75	28.6	30.2	474	172	5.57	30.8	514	15.8	18.4	3.79
33.1	21.9	8.9	168	34.3	23.1	39.2	316	21.1	26.4	3.19
22.9	15.8	12.9	119	34.3	109	221	1027	10.6	13	6.73
11.3	17.6	49.6	110	42.9	27.6	47.8	289	25	42.6	7.23
49.1	15	11.1	142	33.1	12.9	17	311	4.66	16.7	50.9
37.9	38.5	29.4	38.5	27.4	17.8	51.4	610	17.9	37.2	12.4
6.44	16.3	5.33	217	32.2	5.19	37.5	346	21.9	25.7	8.98
56.2	29.4	7.77	18.6	39.2	24.1	35.5	389	33.7	34	14.6
85.1	37.5	11.8	21.9	28.1	26.9	31.6	269	13.8	31.3	30.5
89.8	83.5	19.5	8.66	8.66	43.7	57.8	410	14.3	15.1	9.22
74.3	32.2	1.01	253	16.4	47.4	127	1230	24.6	43.3	3.68
30	23.7	3.34	86.6	14.1	29.4	44.1	343	30.2	21.9	15.4
106	25.5	5.28	204	14.2	4.78	29.4	673	19.6	24.6	22.1
61.5	23.1	96.5	292	63.8	38.2	60.4	461	17.6	28.9	4.66
85.8	20.5	7.84	22.3	31.6	18.9	19.1	255	48.3	60.4	15.1
47.8	17.9	16.7	149	43.7	27.6	46.6	914	18.3	17	5.62
35.5	29.4	23.5	125	49.6	26.2	47.4	523	1.38	30.5	2.67
48.3	19.1	13	55.2	26.7	15.3	27.4	319	1.81	7.77	2.11
111	36.8	48.7	87.4	25.3	18.4	34.9	478	14.5	25.5	19.6
53.3	20.9	11.1	211	22.9	16.8	23.7	352	19.5	18.3	9.82
14.3	13.6	3.31	362	59.4	3.19	2.67	86.6	1.72	1	7.04
39.6	11.1	17.9	15.7	2.53	11.4	13	487	26.9	31.9	11.7
14.3	23.1	11.7	158	40	11.3	21.1	470	18.9	29.2	10.1
126	45.7	2.39	250	1.54	47.8	76.4	939	12.7	18.8	70.4
31.9	17.3	14.5	30.5	72.3	9.65	17.2	552	19.1	17.5	8.58
56.2	30.2	9.22	71	26.7	22.3	38.2	365	25.3	23.3	19.8
131	85.1	25.3	191	88.2	13.3	28.1	410	10.4	14.9	6.44
34.9	10.8	7.43	153	41	22.7	69.2	1176	25.7	37.9	4.45
30.5	12.9	17.6	64.9	14.6	20.4	31.6	396	22.5	39.6	10.5
8.66	20.9	13	46.1	72.3	16.1	21.1	337	17.9	22.3	9.82
46.1	16.1	9.73	34.6	3.43	30.5	40.7	379	31.3	43.3	13
59.4	33.1	33.7	112	15.7	14.3	38.5	704	2	10.9	6.04
93.1	22.3	8.9	211	57.3	53.3	95.6	1526	31.9	45.7	5.78
38.5	22.5	16.1	449	82	34.9	43.7	557	17.9	21.1	6.04
99.1	43.7	9.47	514	107	13.3	20	562	23.9	37.9	14.6
76.4	22.7	14.7	184	47.4	26.9	48.3	352	29.2	44.1	18.3
106	66.7	5.83	188	30.2	8.82	23.7	500	21.9	35.5	15.4
112	28.1	14.3	123	20	3.16	18.4	1134	16.3	37.5	27.1
105	58.3	7.84	175	55.7	7.91	13.7	453	23.1	26.9	15.1
94.7	26.2	5.99	16	35.9	4.03	15.3	487	30.8	26.4	5.19
87.4	153	8.58	13.5	61	26.7	36.2	396	36.2	45.3	17.6
120	41	1	81.3	13.6	22.9	38.5	271	21.9	23.1	7.84
52.3	25	15.4	84.3	26.7	22.1	24.8	281	21.3	27.1	16
19.5	26.4	2.29	42.9	12.5	25.3	34	281	13.2	34.6	27.9
92.2	28.9	1.1	289	31.6	47	68.5	204	24.6	33.1	14.3
133	52.8	13.3	93.1	9.39	12.4	37.5	1310	26.4	40.7	13
31.6	16.7	19.6	58.8	34	14.5	37.9	737	9.91	30.5	9.47
57.8	19.6	10.6	24.1	19.3	14.7	28.6	305	13	35.5	30.5
70.4	25.5	12.9	48.3	11.2	18.3	40.7	362	16.3	20.2	4.53
66.7	23.5	2.13	615	82	9.65	29.7	422	28.9	23.9	13
31.6	12.4	18.3	158	24.1	5.78	20.9	965	25.9	22.1	12.2
86.6	24.1	11.4	204	38.9	51.9	90.6	673	31.1	36.8	10.1
118	31.9	11	42.2	21.3	23.3	47.8	352	15.5	19.6	8.9
61.5	16.8	10.3	40.7	28.4	3.72	11.5	1018	33.4	50.5	12.3
34.9	16.1	5.52	470	53.3	73	119	704	26.9	28.1	4.61
28.6	17.5	18.4	160	24.8	16.5	40.7	1065	26.2	26.9	8.51
25.5	12.4	7.04	225	29.7	13.5	23.3	346	20.9	36.8	13
31.3	28.6	6.61	302	45.7	23.7	40.7	470	42.2	62.1	136
115	39.2	15.1	44.9	46.1	46.1	91.4	1055	25.3	32.8	17.3
76.4	41.4	11.4	97.3	44.1	2.71	6.79	147	24.4	34.9	5.73
99.1	28.6	4.49	22.3	17.6	23.3	45.7	375	25.3	39.6	9.82
74.3	21.1	7.57	77.7	13.6	21.7	37.5	449	30	34.9	14.2
93.1	31.1	9.06	151	5	7.17	26.2	1134	2.89	1	3.05
10.1	22.3	16.7	27.1	35.5	10.6	41.8	567	28.1	47.4	8.06
27.6	39.2	48.3	164	25.3	6.38	38.9	882	21.5	31.3	10.6
12.6	20.5	6.61	170	30	10.3	40	717	19.3	17.5	20
100	28.4	16	124	59.4	41	101	3162	5.99	9.06	2.07
23.7	23.9	5.73	135	17.3	19.3	163	2091	20.7	23.7	11.4
75	24.8	5.99	21.3	22.7	32.8	79.9	599	29.7	46.6	15.4
54.7	46.6	16.3	167	33.7	16.7	27.4	483	46.1	62.6	9.56
52.8	28.6	11.7	64.4	30	17.9	39.6	1144	18.4	21.1	7.84
73	20.5	5.99	253	40.3	4.66	22.1	514	19.3	25.3	13.8
27.9	17.5	6.1	23.9	12.5	79.9	129	1009	5.42	9.56	8.43
89	77.7	8.06	165	39.2	45.7	151	1263	15.4	27.1	2.84
11.2	1.83	47.8	147	150	34	88.2	1084	22.7	22.7	7.7
112	32.8	5.94	337	38.2	5.99	24.1	644	31.9	45.7	20.7
28.9	20.4	8.43	91.4	41	14.9	24.8	355	27.9	31.1	1.63
12.7	13.7	1	1000	117	14.9	28.4	372	18.6	20.4	2.09
59.9	24.6	9.06	17.2	24.4	13.9	29.2	403	1.2	9.73	2.97
29.4	16.7	17.3	129	28.4	4.7	31.6	316	12.4	34.9	19.6
47.4	33.4	3.4	131	40	15.4	24.4	300	45.3	61	16.8
13.6	8.74	1	4.14	23.9	31.1	53.3	457	20.7	31.6	6.61
106	108	6.79	74.3	53.8	10.4	25.7	567	60.4	88.2	28.1
39.6	13.2	14.1	292	54.2	1	3.31	31.9	18.4	14.5	11.9
88.2	54.7	7.43	129	41	22.9	43.3	279	32.5	33.7	8.9
29.4	16.1	24.4	500	147	24.1	43.7	325	30.2	39.2	18.3
72.3	48.3	12.9	33.4	45.3	2.86	18.1	1000	44.9	71.7	17.2
36.8	13.7	12.6	30.2	48.7	25.7	44.5	340	21.3	31.1	8.82
109	45.3	16.1	147	57.8	5.52	15.5	316	42.9	66.7	18.3
27.4	19.8	3.37	239	42.6	110	179	1395	29.7	46.6	12.7
25.9	30.2	1.75	392	21.1	10.3	23.1	372	25.5	17	9.73
16	7.77	7.17	67.3	27.1	24.6	48.3	343	15.4	17.8	10.4
118	56.7	16	19.8	29.2	18.3	28.4	407	22.5	41.4	9.14
36.5	18.1	7.7	20.4	20.2	12.3	43.3	610	12	16.3	7.23
35.5	14.6	16.5	33.4	32.2	4.03	16.8	300	34.9	55.7	16.1
34.3	16.8	3.89	176	40.7	37.9	73	379	61.5	88.2	7.7
13.8	19.3	31.6	311	84.3	9.73	30.2	250	31.9	54.2	14.1
66.1	22.3	17.6	41.4	38.5	20.9	25.3	365	28.4	48.3	15.7
32.2	14.9	63.8	181	34	10.7	32.5	610	33.7	30	16.8
8.74	19.8	10	191	39.2	35.2	57.8	337	18.4	25.9	12.3
103	23.9	63.8	61	82.8	73	223	1420	17.8	23.5	2.64
98.2	33.4	15.3	43.3	15	88.2	147	1486	26.2	38.2	8.13
25	14.6	12.6	139	33.4	10.1	22.7	433	22.5	33.1	2
110	36.8	8.35	19.6	36.8	20.2	51.4	3078	9.82	33.1	15
58.3	18.8	8.58	15.3	60.4	31.3	139	1241	13.3	26.4	13.1
20.9	8.2	7.91	178	34	10.6	21.3	843	13.1	19.5	14.3
105	58.8	20.7	264	75	44.9	71.7	1124	26.9	36.2	13.2
64.9	29.4	17	51.4	17.3	74.3	104	956	40	47	10.8
88.2	25	12.7	211	35.9	30	34.6	385	20.9	23.1	13.9
69.2	18.1	9.39	164	27.9	13.5	26.9	259	47.4	69.8	27.6
51.9	28.6	21.7	26.2	38.9	21.1	39.2	237	16.8	35.5	17
28.4	20.4	25.3	51.9	24.8	4.96	16.3	922	23.5	42.6	11.9
45.3	21.5	41	85.8	66.7	23.3	30.2	237	31.6	42.6	7.84
157	73.7	17	193	47.4	11.7	20.4	375	23.5	26.9	15.8
31.6	24.6	8.74	94.7	15.3	68.5	173	1084	26.4	37.2	8.66
139	37.5	14.3	167	36.8	43.3	85.8	1554	19.3	24.1	18.4
56.7	33.7	39.2	135	59.9	17.8	25.3	365	24.6	28.9	8.06
79.9	31.9	8.66	211	11.4	28.4	40.3	257	23.7	40.3	10.4
49.6	11.1	11	161	58.3	20.9	52.3	866	25	41.8	8.06
79.1	30.8	11.7	31.6	66.1	5.33	20	906	21.1	30.8	8.98
36.5	21.7	10.1	184	30.5	102	175	1018	19.1	36.5	8.9
50	13	7.23	139	29.2	54.7	118	1554	24.1	26.7	1.49
20.7	33.7	20.4	13.6	1	27.1	38.5	334	27.9	36.5	8.2
58.8	22.5	2.67	292	27.6	6.73	23.5	1433	27.9	40.7	12.9
52.3	14.6	11.4	127	43.3	17.9	33.4	483	32.8	42.6	13.8
86.6	29.7	20	57.8	92.2	16.4	31.1	340	17.3	34.3	11.2
91.4	55.2	10.1	355	44.5	59.9	103	757	38.9	44.9	13
32.5	14.5	9.56	52.8	18.8	22.3	37.2	483	16.7	43.3	18.6
57.8	32.5	13.9	692	179	14.5	25.7	257	15.5	25.5	12.3
65.5	19.8	5.19	173	34.9	35.9	61.5	355	17.2	34	1.02
64.9	22.9	19.1	704	106	4.66	18.4	757	18.4	26.2	5.47
5.67	17.8	1.32	186	38.5	25.7	30.8	519	22.5	26.9	10.6
57.8	32.5	14.6	108	28.9	13.7	38.5	352	18.6	17.6	13.1
189	153	12.1	138	28.1	6.79	15.1	655	41	59.4	7.37
31.9	26.9	63.8	308	138	4.1	22.5	274	34.3	66.1	46.1
30	11	7.7	127	34	18.8	32.2	368	16.7	29.7	5.94
16.4	13.9	5.88	19.1	36.2	86.6	120	1084	40.3	50.5	18.3
46.6	18.3	10.6	17	50.9	37.9	63.8	466	34.9	50	18.3
27.6	21.1	14.5	118	40.3	132	207	594	41	48.7	5.99
62.6	18.4	9.91	202	36.5	392	547	764	27.9	47	15.3
92.2	47	18.9	123	20.5	1.21	1.01	13.3	18.6	27.9	1.36
50.9	30.2	3.85	9.39	26.7	11.7	34.3	359	29.2	41	5.38
53.8	14.7	11.8	112	51.4	42.2	88.2	764	24.1	34.3	9.65
102	30.8	10.8	164	18.8	34.9	50	610	56.2	73	21.9
72.3	39.2	12.6	183	32.2	61	95.6	1186	20.7	25.3	7.17
86.6	31.1	2.97	239	31.6	18.8	37.5	457	22.9	33.7	5.14
110	35.2	46.1	147	44.9	3.92	20.9	698	20.7	33.7	9.31
42.6	24.1	5.28	42.6	11.5	83.5	213	1928	23.9	30.2	7.3
9.91	25.5	8.58	109	33.7	16.5	25.3	509	22.5	36.8	15.8
106	54.2	7.99	147	35.2	33.1	69.2	777	26.7	35.9	8.35
34.9	17.2	6.04	244	40.7	26.9	47.4	474	59.9	70.4	24.4
4.22	7.57	26.7	311	67.3	14.3	32.2	322	18.8	26.7	11.2
54.2	24.4	7.64	25.7	57.8	21.9	32.8	433	27.9	54.2	5.94
36.5	14.5	1.67	204	50	17.2	26.9	461	16.4	30	13
75.7	18.9	11.4	161	36.2	16	30	133	21.5	22.1	13.3
29.4	22.3	26.7	457	49.1	8.2	21.3	441	20.9	41	8.74
49.6	16.1	8.13	178	17.8	8.74	36.5	583	21.9	35.9	6.92
4.74	18.9	18.1	15	7.84	9.39	18.1	328	18.9	20.7	8.13
56.2	37.2	8.51	30.5	45.7	48.7	129	698	2.23	7.91	13.2
85.1	28.6	11.1	101	62.1	10.5	27.1	1310	27.1	37.2	10.7
14.2	15.4	33.7	95.6	67.3	18.8	33.4	253	22.1	29.7	4.53
120	57.3	10.7	118	29.4	7.57	27.9	866	20.7	38.9	10.3
46.6	20.7	8.98	13.9	41	20.4	55.7	1700	23.3	36.2	6.38
29.7	20.7	8.06	213	37.9	23.9	49.1	244	48.3	67.9	21.5
79.9	26.2	10.7	126	18.3	2.79	17.9	914	24.1	19.5	15.1
15.7	29.7	11.4	92.2	50.5	4.74	13.3	710	1	1	5.33
149	110	20.2	200	22.3	13.3	33.4	791	13.7	26.9	32.8
85.8	23.9	28.4	142	112	67.3	178	991	16	25.3	1
52.3	37.2	2.81	292	36.2	15.7	59.4	1700	21.5	25.3	9.82
160	157	22.9	79.9	77	5.28	22.1	851	24.6	17.3	11.4
99.1	19.6	16.7	8.58	36.2	23.9	45.3	284	28.4	40.3	7.23
31.3	19.1	10.3	104	24.1	24.8	32.8	223	1.53	6.04	3.75
14.3	22.1	13.5	93.1	41.8	15.5	20.4	244	17.5	30	13.9
88.2	52.8	27.1	55.7	44.1	33.7	52.3	359	13.5	42.2	97.3
38.9	20.2	7.84	124	22.3	13.8	30.2	302	17.2	14.2	12.1
175	49.1	15.8	161	30	35.9	56.2	269	18.9	24.6	16.4
125	61	14.5	173	23.1	30	48.3	284	37.5	36.5	19.5
26.4	13.7	7.57	4.29	14.5	13.8	31.6	349	2.76	11.1	4
54.2	22.3	13	161	62.6	31.9	45.7	284	25	29.2	4.91
13.2	6.79	10.3	178	29.2	22.5	38.2	334	13.6	27.6	10.4
20	23.1	14.5	179	34.6	11.3	30.2	276	10.4	11.5	4.07
32.8	20.9	16.7	632	120	3.55	29.4	1640	22.3	34.6	6.15
30.5	48.3	5.83	167	18.3	16	24.4	418	32.2	42.6	16.8
75.7	28.6	13.6	118	37.9	59.4	105	2148	16.1	18.6	5
50.5	20	10.8	175	26.2	26.4	31.3	337	23.3	34	6.21
34.9	20.4	16.7	23.1	12.9	38.2	52.3	407	5.33	10.6	1.88
30.8	12.3	30.2	157	63.8	18.8	36.5	255	15.3	25.9	1.43
56.2	27.4	6.15	225	71.7	15.5	24.4	349	14.1	20.5	11.9
16.3	9.31	12.3	79.1	50	4.41	21.1	297	25.3	33.7	7.1
18.9	5.94	12.2	121	30	19.6	36.5	267	17.9	27.6	14.3
49.1	9.91	1.57	422	15.4	18.4	30.5	478	33.1	61	7.43
20.4	15	67.9	150	13.3	67.9	124	1685	25.7	36.8	5.99
23.9	33.7	22.1	14.1	43.7	19.1	40.3	227	28.9	41.4	9.06
71	22.3	3.4	2.79	24.1	40.7	96.5	1731	15.1	26.9	11.3
27.4	24.1	23.9	8.74	30.5	9.47	23.5	661	3.25	7.64	5.78
25.3	28.4	10.8	87.4	41.8	8.9	18.8	414	15	25.5	4.37
12.6	26.2	20.5	181	77.7	61	107	2129	17.2	21.9	16.3
165	37.5	16.3	223	66.7	10.5	20.7	441	25.5	37.9	16.3
64.4	26.9	34.3	418	113	25.3	67.3	1275	25.3	40.3	18.3
36.8	8.35	7.23	583	132	24.6	54.7	334	22.9	39.6	14.5
84.3	48.3	10.9	125	18.1	17.9	35.9	337	21.7	25.9	7.99
8.66	22.5	5.28	250	38.5	20	37.5	673	2.86	3.19	13.5
7.57	4.91	2.64	372	19.1	15.5	34.3	227	21.5	23.9	10.2
30.5	37.5	8.98	99.1	28.9	9.82	20.7	578	16.4	24.4	14.9
7.91	21.7	9.06	189	18.8	62.6	96.5	1894	7.57	7.04	49.6
7.17	16.3	13	104	39.2	5.09	16.7	757	15.1	18.9	1.49
106	34.3	31.9	58.8	67.3	14.3	40.7	281	18.3	24.1	9.31
94.7	82.8	12.9	145	28.9	23.9	63.2	1540	24.1	37.2	10.6
57.3	25.7	16.1	41.4	29.7	20.7	27.9	259	34	42.9	8.28
16.4	20.7	6.79	14.3	30.5	6.79	15.8	470	11.3	20.9	34.9
68.5	47.8	9.06	25.9	33.1	42.6	73	1176	32.5	43.7	8.35
14.3	15.5	14.1	121	27.4	28.1	46.6	615	18.6	23.1	9.22
86.6	30.2	4.57	557	91.4	20.5	34	400	22.5	42.2	12.1
29.4	42.6	5.94	18.9	30	77.7	122	1065	17.8	19.3	4.57
36.8	23.7	28.1	305	95.6	2.92	14.1	1009	24.4	36.5	8.66
67.3	32.5	17.8	181	27.6	12.6	23.1	437	42.9	63.8	4.57
32.8	16	10.2	34.9	12	14.6	25.9	410	30.5	42.6	8.66
35.2	47.4	13.1	227	46.6	11.3	29.4	276	20.2	16.5	2.19
71.7	47.4	15.7	215	20.4	10.7	19.3	331	1.39	9.22	2.89
85.8	38.2	13.2	184	41.8	20	81.3	1420	77	121	47
66.7	18.3	11.8	120	34	36.5	51.4	437	22.1	17.9	3.31
17	4.37	3.72	257	33.4	8.58	22.3	528	18.1	14.9	5.47
62.1	32.8	6.98	129	27.1	16	34.9	533	19.3	33.4	15.4
35.9	13.5	6.21	519	76.4	12.3	49.6	2227	29.2	39.6	15.4
63.2	37.2	35.9	168	123	23.7	42.2	264	19.3	31.1	1.63
75.7	14.6	4.33	151	35.9	6.38	46.6	396	24.6	38.2	11.9
60.4	26.4	7.5	15.4	47	32.5	69.8	1165	12.7	23.5	9.65
120	107	7.43	158	54.7	20	32.5	279	29.7	46.6	11.5
36.5	19.1	23.3	279	101	13.6	22.9	279	37.2	36.5	14.9
28.6	22.1	8.9	15.3	63.8	26.9	70.4	698	21.3	34.6	5.09
8.66	15.5	14.5	41.8	20.5	21.9	40	211	29.2	34.9	20.4
50.5	15.5	3.92	523	66.1	2.97	12.1	1155	16.4	27.1	7.23
38.5	30.5	13.1	21.3	24.4	16.7	59.9	874	28.9	25.9	16.4
9.39	17.8	3.16	229	34.6	9.31	13.6	505	36.2	56.2	16.3
18.4	10.6	9.56	86.6	22.1	34	42.9	311	22.9	25	6.21
26.9	18.3	5.09	176	34.3	32.2	44.5	359	21.7	32.5	9.06
19.1	21.7	8.35	164	59.9	4.29	38.5	982	33.4	42.6	7.84
35.2	12	12.6	115	44.9	66.7	176	799	33.7	46.6	10.3
35.2	15.3	3.59	179	40.3	12.4	32.8	547	18.1	26.4	18.8
40	22.5	1	737	63.8	23.3	25.3	294	24.8	37.5	15.8
84.3	25.9	23.5	24.8	18.1	5.99	10.6	791	28.6	35.2	13
3.46	16.1	11.5	109	26.7	13.1	31.3	626	28.6	31.9	15.5
37.5	11.8	38.2	365	79.9	5.19	22.5	906	26.4	36.8	8.28
89	33.7	13.8	28.4	16.5	75.7	227	1382	19.1	26.2	6.61
67.9	19.1	21.5	43.3	57.8	40	55.2	673	12.7	15.3	8.13
20.4	13.7	6.61	11.4	16.4	30.2	45.7	418	24.8	22.5	4.87
14.7	17	18.3	21.3	27.9	44.9	56.2	325	24.8	26.7	10.5
19.8	18.4	10.3	18.4	10.4	40	124	750	23.7	27.9	3.28
45.7	14.2	1	437	55.2	11	20.4	319	18.6	30.8	3.13
70.4	55.7	58.3	198	56.7	10.6	9.39	359	24.1	16.8	12.7
4.33	1.01	7.17	5	1.45	5.88	17.5	389	23.9	24.1	10.6
44.9	48.7	13.8	227	32.8	4.1	20.7	552	15.5	23.7	23.7
58.3	17.8	15.7	269	44.5	16.5	40.3	379	25.5	20.4	8.06
45.3	43.7	41	198	153	14.9	21.3	200	22.9	22.9	11.7
59.9	15.4	11.1	78.4	8.13	9.91	34.6	991	17.8	31.9	5.14
42.2	15.7	10.4	193	11	30.8	43.3	382	17.6	23.1	2.29
15.1	11.2	12.2	271	44.9	15.3	51.4	2247	1	4.91	1.53
72.3	40.7	17	88.2	23.7	13.8	25.7	319	25.9	34	9.73
87.4	66.1	11.7	121	25.7	22.5	37.2	410	15.7	16.7	1.57
31.1	24.1	12.3	89.8	42.2	38.9	55.7	328	27.4	46.1	10.9
51.9	23.9	2.76	271	40.3	25.3	28.9	211	22.3	32.8	6.55
48.7	20	8.98	9.31	36.5	10.9	20.9	403	18.4	33.1	11.2
69.8	26.4	11.4	172	55.7	42.2	136	649	5.67	5.14	12.2
44.9	16.4	7.37	308	39.6	1.75	21.7	851	22.5	29.4	10.9
112	34.6	14.9	104	40	19.1	28.1	274	15.4	17.3	9.39
41.8	20	3.59	13.5	38.9	50.9	79.1	1219	1	11.7	6.98
86.6	30	11.3	157	23.1	21.5	53.3	557	1.24	3.75	5.38
62.6	29.7	8.13	271	44.5	46.6	86.6	1263	12.1	11.1	2.31
76.4	57.3	4.53	13.7	11.9	25.7	47	352	53.8	72.3	8.43
61.5	23.3	16.3	281	52.8	24.1	106	1540	20.2	31.3	13.8
