# Supplementary material
Source: ML conference proceedings conference paper supplement (https://openreview.net/forum?id=nrbR2F29vU)
Supplement: supplementary_material [file 4. cd3cd28+g0076.xls]

## Sheet: Sheet1
praf	pmek	plcg	PIP2	PIP3	p44/42	pakts473	PKA	PKC	P38	pjnk
176	294	337	644	9.73	18.4	101	5.99	93.1	505	142
126	204	164	308	2.53	99.1	835	16.8	1358	6436	2110
433	710	233	422	8.66	23.9	150	3.11	91.4	487	202
161	248	362	661	6.38	69.8	505	8.98	1358	6916	4740
151	257	93.1	172	14.3	47	392	26.4	69.8	422	418
578	1037	246	777	33.1	49.1	319	10.6	32.8	165	131
305	483	1446	2148	89.8	37.9	235	9.56	248	1433	750
231	410	239	414	9.91	31.3	250	2.81	82	514	141
1747	2267	99.1	184	5.33	48.3	372	6.61	392	2167	890
191	276	262	491	3.02	32.5	175	7.3	35.5	205	723
483	717	1018	1811	70.4	82.8	542	5.38	37.2	215	723
250	426	175	362	1.63	42.2	274	12.9	35.2	191	135
294	461	102	200	3.19	23.3	117	4.57	137	723	385
17.2	44.1	241	403	6.85	13.6	153	6.79	59.9	362	146
365	583	505	914	49.1	18.9	104	11.1	146	799	227
1018	1625	110	209	3.96	53.8	403	2.86	54.2	308	284
626	851	281	453	12.4	81.3	562	15	279	1747	704
175	264	61.5	124	3.75	62.1	426	7.23	191	1084	346
898	1499	599	1084	54.7	73	418	7.57	78.4	474	221
410	764	168	362	9.14	23.9	137	11	193	1018	906
170	311	108	207	2.48	193	1433	40.7	167	914	375
161	286	429	866	4.41	34.9	276	1.24	62.6	246	108
375	667	685	1334	8.51	54.7	340	12.2	225	1346	403
13.1	10.4	359	547	8.35	55.7	313	10.1	89.8	557	154
217	368	313	528	6.04	48.7	331	3.11	337	1811	262
119	165	365	604	10.6	64.9	505	15	48.7	316	209
161	239	679	1124	25	33.4	257	30.8	22.5	158	43.7
39.2	57.8	414	799	2.97	64.4	352	13.8	133	698	117
890	1407	158	246	10.2	43.3	262	9.65	37.9	246	109
82	141	325	583	6.38	44.9	257	8.9	874	4332	806
67.3	100	279	422	8.28	59.9	392	4.61	82.8	426	281
368	583	368	679	5.23	69.2	505	7.7	17.8	99.1	47.4
186	313	379	644	31.9	55.2	382	10.5	108	723	248
1241	1794	1018	1640	44.5	56.2	368	14.5	60.4	343	172
259	410	138	202	1.39	65.5	461	9.82	30.2	157	204
429	673	105	200	3.96	72.3	470	19.8	828	4105	1499
223	325	813	1407	16.8	42.6	248	12.2	66.7	316	106
90.6	135	487	1027	61	108	730	7.1	16.7	89.8	31.6
188	362	355	649	14.9	69.8	478	7.04	53.8	319	104
297	514	322	632	1.17	21.7	107	9.22	30.5	198	114
173	300	906	1582	15.3	18.1	113	2.31	103	583	146
337	542	557	1027	2.33	17.6	105	82.8	227	1230	737
155	223	48.3	82.8	16.3	11.2	59.9	110	67.3	429	119
973	1499	685	1241	9.06	196	1358	71	704	3587	914
334	528	84.3	160	20.5	34.3	239	5.94	70.4	396	167
61	76.4	123	276	13.9	79.9	500	8.51	730	3752	2187
414	770	219	389	16.4	44.5	308	1.72	42.2	297	183
227	396	181	325	9.73	22.7	114	1.67	982	4740	1596
698	1084	667	1114	39.6	47.8	255	8.9	36.2	204	53.3
227	343	170	340	20.5	40.7	213	9.91	244	1322	1219
400	626	153	239	4.53	45.3	316	12.1	102	599	90.6
172	297	1208	1928	17.9	117	723	9.06	30.8	191	82
343	528	188	365	9.39	73	491	7.91	47.4	328	253
89	151	125	286	4.7	29.4	191	4.74	61	346	131
151	262	302	509	2.15	14.7	168	4.96	352	1963	1420
44.1	86.6	125	215	6.79	54.2	389	16.5	15.1	77	956
352	583	137	257	10.2	31.1	189	8.82	82	466	175
2350	3685	1104	1843	9.73	47	269	9.91	115	874	133
137	225	173	289	11	26.2	150	1	221	1186	414
491	813	121	262	1.01	32.2	155	4.74	461	2458	191
136	178	264	449	7.64	27.6	221	9.06	279	1568	737
193	346	231	392	5	104	679	8.9	284	1554	422
271	392	129	246	16	37.2	231	11.8	76.4	519	181
151	289	53.3	67.3	55.7	98.2	655	14.9	26.2	168	14.5
528	866	231	392	19.3	101	717	12.4	244	1611	349
115	215	385	685	66.1	26.9	168	2.57	106	717	355
142	215	181	368	13.3	21.9	160	3.89	340	1911	1322
292	437	557	1104	21.9	38.5	233	17.2	40.3	248	227
70.4	110	1860	2943	135	52.8	355	5.88	167	982	200
127	225	173	325	3.05	47.8	305	27.9	198	1208	644
382	615	269	519	15.1	58.8	433	9.39	1055	5280	1310
70.4	90.6	375	644	12.3	24.8	132	6.85	241	1446	922
505	965	241	449	1	87.4	578	13.2	313	1625	461
1499	2247	217	359	6.73	41.8	178	7.84	225	1358	478
239	379	255	422	1.64	64.9	470	3.05	90.6	583	195
305	437	389	757	14.3	38.2	221	1.36	25.7	117	106
365	567	130	237	10	65.5	340	20.5	1165	5674	1370
319	523	453	914	22.1	34.3	235	6.55	42.9	211	217
205	305	757	1322	13.7	19.1	94.7	70.4	61.5	349	337
2813	4179	313	599	13.8	36.5	241	8.98	99.1	644	227
172	262	533	890	31.3	67.9	453	5.73	375	1981	685
93.1	137	311	638	6.38	83.5	599	8.66	95.6	523	246
202	325	743	1208	17.9	67.9	372	9.91	76.4	491	111
178	284	292	514	1	64.4	407	17	64.9	372	193
151	257	195	311	6.55	14.7	50	44.1	142	931	470
225	382	95.6	172	1.02	30.2	186	9.22	131	764	292
176	284	1094	1827	44.1	2.07	37.5	12.7	38.9	264	80.6
215	328	599	1027	11.5	100	599	23.5	784	3820	1963
470	784	193	337	11.2	31.1	175	11.5	44.5	257	127
939	1370	96.5	188	8.58	26.4	200	5.62	20.9	127	50.9
129	248	225	375	5.38	44.9	382	2.17	45.3	250	229
313	429	195	385	15.1	78.4	523	28.4	34.9	52.3	1197
437	806	123	244	4.57	49.6	286	88.2	973	4614	1472
227	400	1554	2525	120	89	552	31.9	188	1252	346
813	1334	519	965	15	48.7	279	14.3	38.9	244	219
129	229	604	1000	25.9	42.6	225	10.9	578	2969	638
284	457	146	284	11.8	56.7	289	26.7	340	2035	319
244	313	319	542	3.22	74.3	449	13.6	257	1512	866
355	615	1370	1963	34.6	41	235	6.67	124	615	372
368	610	167	292	13.3	52.3	422	6.1	20.2	47	1370
302	441	737	1275	25.3	69.2	313	31.9	35.9	235	191
193	337	66.1	98.2	8.98	73	437	20.4	231	1407	922
284	523	355	692	15.1	72.3	509	18.1	29.4	142	139
93.1	114	379	743	13	145	1018	13.8	104	704	276
135	202	429	692	17	57.3	375	23.7	170	1084	449
1358	2072	114	233	4.87	35.5	161	10.3	108	615	200
167	211	235	414	9.31	125	799	37.5	102	632	325
567	770	71.7	141	6.61	34.3	207	4.96	47	302	178
181	331	483	843	17.8	3.72	28.6	71	982	5003	2864
519	890	276	588	6.98	108	632	5.14	19.6	93.9	160
2890	4451	698	1263	157	55.2	365	13.6	1186	6153	1134
200	300	289	496	5.88	63.8	368	9.06	93.1	562	319
105	239	322	557	29.7	142	1009	54.7	46.1	191	437
279	491	4.66	11.9	15.5	56.2	372	11.9	188	1104	1027
248	407	422	828	9.47	32.5	188	12.1	179	1075	158
621	1027	229	466	5.78	15	121	4.61	17.9	130	66.7
145	241	145	246	1.67	40.7	246	8.43	27.6	150	24.6
104	191	200	365	9.22	79.1	385	8.58	698	3429	1685
615	991	217	368	10.1	40.3	297	7.43	31.1	209	183
692	1065	820	2308	80.6	91.4	509	34.9	42.6	271	69.2
143	221	1582	2548	40.3	89	594	23.3	542	2943	2503
191	284	44.5	71	13.7	66.7	368	10.8	17.8	89	965
145	244	114	207	4.57	44.5	229	13.9	55.2	334	71.7
1075	1625	276	523	10.6	71.7	449	11.1	3.11	40.3	813
372	533	1263	1999	47	27.9	184	1.09	114	730	207
311	519	246	403	11.5	85.1	437	16.4	80.6	478	313
219	352	3.37	15.3	30.5	75.7	509	15.5	52.8	346	302
281	433	271	461	7.5	60.4	340	19.3	137	851	389
250	441	215	418	10.5	25.5	189	1.01	1346	6671	2864
284	433	359	583	9.39	18.4	103	5.05	98.2	610	131
685	1208	153	300	5.38	58.8	359	13.8	47.4	286	368
71.7	137	1094	1670	30.2	26.9	195	9.56	126	866	235
241	418	343	655	10	91.4	519	9.56	51.9	264	483
142	213	184	286	15.8	16.7	146	5.78	1	13.3	12.9
70.4	100	1670	2458	113	93.9	567	39.6	65.5	379	91.4
269	474	101	198	9.31	28.4	183	33.7	583	3023	2207
308	509	557	922	15.1	43.3	178	8.82	48.7	302	87.4
138	246	129	259	19.6	67.3	362	31.3	65.5	379	533
337	533	112	191	4.33	78.4	500	5.88	44.1	264	184
202	269	229	375	18.6	18.8	106	6.26	42.9	250	193
124	217	104	186	38.2	50.5	331	21.1	61.5	403	799
142	231	225	414	1	119	710	7.91	487	2864	692
311	528	170	279	12.4	101	673	20.7	35.5	186	147
1395	2148	75.7	119	1.65	91.4	567	25.9	27.6	172	89
1611	2350	239	375	1	44.1	225	9.65	93.1	626	59.4
209	349	239	437	3.31	50.9	264	18.1	679	3398	1322
150	248	313	610	13.5	55.2	297	95.6	56.2	355	163
433	698	1084	1860	1.53	64.4	382	17.5	118	784	343
704	1346	382	583	6.67	71.7	433	8.66	217	1230	496
359	621	453	991	28.1	53.8	362	5.33	59.9	343	135
165	264	588	1124	6.26	104	610	27.9	46.6	294	107
219	355	96.5	163	12.2	53.8	271	1	75.7	418	346
198	308	160	305	3.75	78.4	710	89	49.1	305	141
21.1	15.3	205	396	9.65	69.2	567	17.8	491	2714	806
308	470	147	229	4.37	34.6	181	2.92	107	599	255
122	209	965	1540	10.3	160	882	55.2	799	4105	2227
638	1114	188	349	10.5	42.9	319	9.47	286	1655	229
223	372	149	257	5.73	27.9	113	2.69	49.6	302	167
519	965	183	328	7.23	11.5	108	4.1	55.2	379	179
215	322	281	552	4.7	41.4	229	16	349	1827	262
173	340	610	1230	6.85	81.3	500	16	109	615	155
389	692	410	717	11.9	41.8	200	14.3	441	2393	764
352	615	183	257	5.42	27.6	198	7.04	557	3051	588
259	362	110	209	7.64	45.7	271	16.5	730	3718	1009
223	362	410	730	11.8	111	661	14.6	302	1640	626
349	594	195	337	12	38.5	219	14.7	79.1	487	165
179	308	150	445	18.3	50.5	205	11.9	67.3	478	106
352	562	147	271	4.41	33.1	267	3.89	403	2267	991
352	599	433	791	5.33	96.5	723	4.18	22.5	127	29.4
325	547	160	250	10.3	16.1	111	8.51	92.2	519	334
3820	5829	125	209	1.01	103	528	10	94.7	578	267
286	496	255	389	1.11	28.1	175	6.73	154	851	202
429	723	248	414	11.7	57.3	292	15	385	2110	1263
158	246	340	655	6.61	12	64.9	153	131	764	237
223	267	385	692	16	126	820	40	106	649	193
154	239	271	500	1.01	69.2	445	10.6	784	3854	1037
429	667	433	791	20.7	34	225	3.02	483	2393	1084
400	552	149	248	2.29	76.4	483	3.05	50	331	97.3
141	215	75.7	151	4.14	80.6	466	22.3	170	1055	372
483	757	259	491	15.3	75.7	474	12.3	69.8	414	250
158	257	89	178	8.2	104	583	11.4	211	1322	1472
355	533	302	567	9.06	62.1	362	9.39	135	799	235
1811	2666	300	514	15.8	39.6	259	7.17	47	325	241
191	262	71.7	121	8.82	103	615	36.2	474	2666	1000
239	379	211	365	8.06	9.73	85.8	1.55	91.4	542	113
281	478	673	1124	55.7	46.1	219	10.3	155	843	241
316	505	392	750	6.49	42.2	196	7.3	195	1027	898
389	685	843	1433	16.5	66.7	528	4.18	158	973	160
297	514	176	334	5.88	142	806	10.2	112	737	257
956	1499	322	523	4.29	62.6	396	30	32.5	205	135
1037	1433	241	433	3.52	202	1219	83.5	54.2	281	92.2
375	644	567	1027	16.7	38.2	223	1.08	1104	5674	965
294	478	106	188	2.33	8.66	82.8	12.5	104	638	248
207	334	225	407	10.7	38.2	262	8.28	34.9	161	77.7
433	632	340	573	16.4	39.2	300	5.28	308	1794	368
311	505	365	692	6.32	29.4	188	8.35	132	730	866
302	491	179	325	5	105	655	11.4	56.7	349	99.1
1762	2525	302	588	14.5	80.6	567	10.5	76.4	487	276
77	110	599	1114	26.2	89	621	6.15	34.9	141	67.3
209	313	160	316	10.1	124	835	15.3	34.3	181	143
198	389	119	248	3.59	45.7	253	12.2	106	583	389
219	385	6208	9058	308	19.3	130	5.05	259	1322	191
297	445	673	1186	10.6	63.8	331	21.7	51.4	292	81.3
158	276	167	292	12.3	71	418	4.14	47.4	264	145
422	698	204	325	1.09	77.7	523	5.67	410	2247	1000
118	163	46.6	102	4.7	112	679	17	422	2329	1298
215	372	1596	2738	59.9	58.8	355	8.35	40	211	54.2
538	843	67.9	108	5.19	16.4	106	1	138	906	355
225	349	457	806	10.5	82	547	3.16	49.1	343	170
202	325	667	1155	11.3	103	514	16.3	509	2642	982
661	982	223	389	22.3	133	777	13.6	33.7	50.9	1094
244	385	35.5	91.4	54.2	46.6	289	3.46	202	1219	229
400	523	599	1075	10.6	198	1346	11.5	655	3249	1334
1155	1582	914	1526	33.4	59.9	325	12.9	70.4	433	239
311	533	267	441	2.76	49.6	319	9.31	62.1	403	44.1
269	359	9.31	33.7	19.5	108	813	22.5	106	573	181
322	578	124	248	1.51	66.7	523	26.7	147	757	186
346	583	407	704	12.2	46.6	219	103	828	3995	1811
172	239	1526	2350	50.5	64.9	496	17.5	583	3134	956
231	346	183	331	17.9	105	599	13.1	51.9	343	300
737	1219	181	322	6.61	59.9	433	15.7	94.7	528	150
334	578	244	418	4.87	47.8	302	1.45	120	667	723
396	615	215	346	1.14	29.4	149	1.93	18.1	32.8	418
205	294	179	325	6.92	38.5	235	13.3	939	4870	1911
418	632	196	385	10.8	63.8	392	14.6	125	737	632
281	426	135	233	13.2	31.6	189	9.65	41.4	248	46.6
264	396	1208	2035	66.7	127	655	12.3	88.2	505	264
835	1286	730	1420	26.9	47.4	337	42.9	22.5	102	129
806	1176	604	1114	12	88.2	583	10.5	165	882	542
132	225	82.8	638	47.8	71.7	389	13.1	449	2393	1433
583	922	533	874	26.9	21.1	189	2.48	478	2642	1219
165	209	316	533	5.23	67.9	466	10	121	737	167
160	248	375	704	8.51	27.4	142	4.49	117	730	146
123	209	106	196	9.65	66.1	410	9.14	281	1731	991
1046	1526	313	638	6.15	42.2	300	17.2	175	1144	392
457	632	135	239	6.44	120	914	52.3	19.1	63.8	1512
1046	1625	311	542	18.3	77	644	4.1	135	874	264
161	239	289	573	3.89	44.5	231	1.57	250	1625	276
94.7	138	151	225	6.21	68.5	426	7.77	88.2	528	105
667	1219	237	407	6.38	57.8	343	7.64	96.5	466	133
157	229	101	213	42.2	102	621	14.6	75	509	167
567	965	491	906	1.79	14.2	69.2	5.38	149	1027	328
231	372	820	1778	25.9	121	858	12.1	143	947	1018
244	319	195	375	5.14	38.2	255	12.6	91.4	514	478
246	372	294	523	5.99	82.8	478	10.9	69.2	372	207
441	820	239	340	7.77	12.1	98.2	9.82	71	433	286
294	457	284	441	21.5	30.8	124	11.4	100	692	433
102	164	233	407	12.2	59.4	385	10	487	2690	1075
165	250	300	567	10.5	161	991	7.91	10.4	43.7	965
692	931	276	478	14.6	113	626	15.8	396	2017	496
638	982	112	205	8.2	67.9	483	5.47	59.9	343	1395
235	368	96.5	150	4.53	105	557	4.29	37.2	198	191
248	429	244	453	8.2	41	200	6.92	130	770	255
331	621	129	547	15.3	89.8	523	11.3	186	1000	723
973	1472	77	114	13.6	25	137	8.66	86.6	588	127
313	491	165	661	22.7	73	500	14.3	79.1	538	262
578	1000	149	271	2.07	38.9	257	11.5	52.3	385	274
750	1298	385	667	5.38	42.9	264	7.91	78.4	429	284
133	259	250	461	1	58.3	349	37.9	32.5	154	813
368	632	1860	2890	93.1	96.5	583	8.13	118	679	138
227	422	305	437	21.9	99.1	777	3.13	26.2	64.4	882
474	737	217	305	5.52	106	723	3.43	61	325	175
200	294	1124	1860	95.6	17.9	123	14.3	43.7	250	110
1104	1526	153	316	7.5	83.5	604	34.3	25	130	56.7
93.1	132	474	757	24.8	64.9	437	8.9	105	557	184
250	346	305	528	6.21	42.9	198	18.8	46.6	286	262
1252	1843	491	922	12	76.4	496	5	313	1946	274
262	483	135	241	3.72	87.4	533	8.66	11.3	53.8	84.3
547	914	723	1370	11	27.9	200	9.73	209	1165	286
202	337	89.8	196	8.28	91.4	470	23.5	45.3	274	129
931	1433	90.6	200	3.31	72.3	437	10.7	55.2	325	80.6
557	939	269	491	12.5	17.8	97.3	13.1	1611	7499	2247
175	241	316	562	4.03	55.7	308	9.06	52.8	284	146
379	523	64.9	121	2.67	56.2	286	5.99	205	1124	1009
1114	1611	685	1252	17.2	58.8	375	9.91	1155	6378	2035
257	392	922	1568	36.5	24.8	89.8	10.2	130	698	233
133	235	552	1009	6.61	75	403	11	71	375	202
96.5	150	215	316	8.9	43.3	284	4.37	50.5	292	168
1843	2788	523	931	19.3	50.5	267	5.73	52.3	286	151
723	1252	519	991	14.9	47	250	1	34.9	188	34.9
127	186	396	717	11.9	28.9	202	14.3	86.6	487	382
105	183	145	264	4.03	157	1055	33.4	90.6	533	300
198	340	115	193	1.95	23.7	184	7.77	400	2480	757
196	313	730	1346	15.5	69.8	385	8.58	27.4	108	111
346	562	200	331	8.58	5.57	20.5	79.9	44.1	262	87.4
184	289	284	478	10.3	42.2	325	7.7	95.6	542	244
202	519	325	483	7.7	45.7	244	11.4	120	621	286
99.1	126	300	496	20.4	23.5	141	7.1	73	478	108
271	403	433	698	21.5	28.4	150	16.1	184	956	146
117	173	176	311	7.04	54.7	429	4	154	906	139
57.8	114	400	730	6.44	41.4	179	12.6	403	2129	2436
235	355	717	1433	29.7	37.5	205	15.7	96.5	547	160
644	1009	828	1472	80.6	32.8	160	6.67	59.4	340	80.6
368	632	491	791	13.9	22.9	123	18.4	204	1018	2864
313	461	50.5	142	71.7	38.5	271	8.2	47	279	124
186	286	2110	3491	53.8	20.2	145	2.97	54.2	311	103
200	286	267	478	7.99	60.4	375	6.92	223	1219	1843
325	519	178	328	2.69	89.8	655	7.99	59.4	305	217
743	1124	93.9	167	10.2	41	316	5.94	189	1230	237
127	250	131	257	8.98	21.9	103	8.58	109	692	158
108	167	284	470	9.06	61	311	3.05	42.9	215	75.7
1715	2480	365	704	8.2	84.3	505	14.9	36.5	189	111
334	528	155	284	4.26	99.1	557	20.2	83.5	538	178
126	205	168	284	10.1	61	340	16.8	85.1	509	191
138	255	54.2	90.6	5.14	42.6	300	2.48	158	939	253
445	632	183	355	4.53	39.2	211	8.66	75.7	496	173
851	1310	389	632	4.37	63.8	349	69.8	241	1407	982
121	205	93.1	211	9.91	8.28	22.5	58.3	57.3	429	111
2329	3398	328	567	12.4	111	717	9.06	151	1055	237
217	308	267	496	7.3	30.5	231	13.9	135	750	297
147	215	184	325	5.73	20.7	141	1.7	39.6	257	241
189	328	359	649	5.83	59.9	319	20.7	56.2	352	396
168	248	547	991	17.6	51.9	322	12.6	38.5	257	74.3
311	514	250	418	16.4	95.6	542	14.2	93.1	698	262
2017	3220	104	179	1	123	770	35.5	35.5	241	117
449	667	1055	1794	38.2	36.2	160	23.7	50.9	313	69.8
257	355	799	1655	40	40	289	10.1	1065	4958	1310
161	300	743	1472	31.6	24.8	142	6.61	777	3854	1165
379	604	331	632	11.5	97.3	533	11	81.3	457	227
41	45.3	644	1144	22.1	79.1	519	19.5	45.3	92.2	667
227	362	138	253	2.27	56.2	392	6.67	198	1219	281
237	311	196	343	7.37	69.8	400	13.6	93.9	437	621
1486	2227	743	1407	15.3	106	698	28.1	139	799	322
79.9	104	101	186	9.22	42.6	313	7.17	49.1	281	77
806	1219	183	337	1.01	80.6	610	2.76	186	1134	392
153	286	562	1046	11.1	141	914	7.91	118	698	1685
195	328	799	1526	23.3	57.8	193	2.21	170	1084	221
244	400	119	215	6.85	62.1	385	7.04	49.6	300	127
1114	1685	158	286	9.65	19.1	75	6.1	25.7	146	46.1
538	764	2267	3619	91.4	82	474	23.7	679	3555	1176
31.1	99.1	35.9	58.3	4.33	61.5	403	1	31.3	163	661
496	730	142	284	1	32.2	195	46.1	77	396	137
279	429	379	723	10.2	60.4	375	11.7	28.9	207	80.6
1526	2187	281	483	10.6	19.5	82.8	7.57	164	866	2148
828	1263	219	457	17.3	23.7	118	3.22	97.3	737	337
259	368	124	202	10.4	19.1	129	4.29	45.7	253	770
470	743	84.3	142	6.26	44.1	334	6.44	85.8	547	255
1197	1747	233	461	18.6	33.7	168	7.91	487	2503	1486
221	331	241	453	5.47	29.7	139	1.7	58.8	355	931
93.1	137	176	322	14.1	47	289	1	82.8	478	241
305	491	1459	2329	57.3	36.5	225	6.44	11.2	76.4	269
231	372	161	289	8.06	101	594	11.7	62.6	400	200
281	433	150	274	1.42	38.2	221	13.6	4.96	26.4	750
81.3	106	422	813	2.89	43.7	244	14.1	599	3220	947
231	365	692	1322	25	146	914	3.22	43.3	231	163
279	478	125	225	13.8	37.2	221	114	158	973	316
271	519	1286	2207	213	97.3	698	9.47	305	1778	1186
200	308	1670	2690	61	25	178	8.51	286	1486	770
98.2	165	426	710	25.9	54.7	319	1.68	1000	5048	2110
233	437	27.6	102	44.9	54.7	297	8.2	85.8	474	379
138	207	141	276	1	54.2	349	13.6	281	1526	777
302	509	81.3	491	26.4	191	1219	43.3	63.2	375	71
143	255	178	313	1	15.7	48.3	36.5	72.3	453	229
237	365	372	806	20.7	55.2	368	5.94	149	866	1263
131	223	692	1382	14.7	103	764	10.6	191	1263	253
372	519	478	799	22.3	47.8	281	6.49	61	385	145
523	890	250	410	10.6	141	866	85.1	24.4	147	94.7
325	542	262	478	20	79.1	429	3.46	21.5	118	124
474	791	302	410	10	53.3	407	13.2	253	1286	372
151	262	207	372	17.6	85.8	519	15.4	61.5	233	319
250	389	281	491	6.55	71.7	500	6.04	88.2	509	135
418	673	777	1420	3.72	24.6	165	2.39	53.3	316	176
115	170	346	567	11.1	37.9	178	5.14	246	1370	379
743	1104	211	365	1.24	77	441	5.94	137	898	365
259	362	410	1075	59.9	42.2	213	13	142	806	743
496	757	151	300	6.15	83.5	588	1.57	40.7	269	121
132	213	96.5	178	4.45	38.2	223	4.87	36.8	193	207
308	441	478	914	15.8	54.2	389	4.41	22.9	131	196
259	445	673	1310	16.7	1	7.1	12.4	52.3	305	343
385	638	799	1554	24.1	79.9	538	13.8	56.7	340	77
297	514	308	547	22.1	67.3	355	6.85	75	433	519
349	547	158	237	1.01	69.8	382	14.5	188	922	1395
271	453	466	777	11.3	66.7	379	9.65	69.2	389	175
172	271	352	661	31.9	85.8	557	24.8	86.6	491	253
710	1197	449	770	15	47	325	4.61	47	297	41.8
281	483	231	389	9.65	17.8	121	7.3	32.5	204	135
337	509	231	445	6.38	10.5	61	7.17	186	1219	248
392	542	250	382	2.05	33.7	284	11.5	95.6	567	1065
231	362	142	248	5.88	85.8	583	26.7	17.2	85.1	50.5
626	1018	743	1298	16.8	122	730	17.9	33.4	198	120
730	1208	311	519	19.1	47.8	276	8.98	61.5	352	362
276	375	186	368	4.29	61.5	400	21.1	126	820	113
523	914	138	223	7.84	77	500	10.2	311	1911	349
331	496	441	866	10.8	117	835	17.9	355	1981	1275
191	319	349	737	1.01	19.6	107	1.58	142	813	340
1000	1526	685	1186	20.7	25.9	143	5.57	111	698	205
599	1018	474	799	11.2	219	1499	18.6	101	621	129
103	155	104	202	1.37	71	514	5.47	53.8	281	120
305	422	478	898	11.5	15.4	79.1	1.36	28.1	160	94.7
276	396	215	414	9.39	45.7	331	2.86	67.3	355	196
557	828	1512	2595	294	45.3	276	12.2	13	64.9	1084
105	200	483	931	5.73	75	445	13.2	47.8	325	172
292	461	349	661	4.57	41.4	305	9.91	111	843	207
130	244	233	400	5.19	98.2	610	20.4	54.2	349	142
4614	7105	151	267	13.7	34.9	204	6.26	53.8	311	118
322	474	567	1094	13.8	43.3	196	1.51	25	66.1	578
135	207	164	319	1.78	35.9	262	13.9	770	3619	947
195	281	1670	2548	98.2	40.7	227	12.7	76.4	426	359
213	349	400	820	7.84	51.4	239	5.57	109	717	259
478	973	389	1554	117	89	626	16.5	1186	5573	1144
225	343	372	621	12.7	12.1	53.8	136	71.7	400	308
487	757	835	1358	7.23	67.9	407	10	167	991	632
253	368	96.5	170	3.22	122	552	22.7	30.2	158	362
400	557	588	1065	13.5	16.4	92.2	4.45	172	1027	325
213	382	322	594	7.57	56.7	328	4.53	129	750	267
237	362	2148	3278	37.2	15.1	106	1	81.3	538	250
253	437	149	302	10.1	36.5	233	6.61	32.8	223	82
418	673	110	217	3.79	37.2	193	5.28	115	615	113
195	325	250	433	8.82	143	1037	84.3	57.8	349	132
74.3	115	168	410	22.3	54.2	297	14.1	97.3	604	193
106	151	346	594	7.23	15.3	75.7	9.56	85.8	362	362
328	528	198	294	6.38	74.3	496	4.66	83.5	528	319
207	311	445	813	11.1	44.5	305	10.2	125	764	246
294	414	104	191	10.6	31.1	255	5.33	28.9	160	66.1
151	292	1346	2247	126	60.4	305	14.3	87.4	552	1596
257	487	136	255	4.66	35.2	204	4.49	43.3	286	173
105	151	750	1596	24.6	126	874	35.2	109	704	85.1
294	474	209	385	8.43	66.1	375	2.29	5.23	34	973
154	181	649	1027	52.8	70.4	500	7.17	79.9	483	262
389	667	183	355	8.66	49.1	365	7.37	259	1446	588
111	161	500	866	24.6	76.4	445	6.38	9.22	34.3	523
340	588	505	858	11.2	81.3	509	2.57	41.8	294	157
92.2	130	372	757	21.5	82	491	8.28	161	947	375
1370	1860	193	385	257	70.4	410	5.67	49.1	311	84.3
30	71.7	193	325	8.98	18.4	123	1.93	127	914	284
355	519	692	1310	13.8	117	806	31.3	163	991	483
57.8	50.5	474	858	8.98	19.3	167	8.58	167	1124	410
202	302	74.3	93.9	12	69.2	457	20.2	55.7	340	211
316	449	316	588	17.5	32.2	202	5.83	53.3	328	131
730	1241	267	470	9.06	117	638	6.55	107	649	279
1794	2714	271	487	1.38	34	163	7.84	229	1395	777
1459	2110	170	313	7.43	53.3	372	8.35	213	1155	509
331	523	191	325	10	47	355	12	54.2	340	225
1037	1611	281	474	14.1	27.4	132	1.98	437	2329	1075
379	573	1459	2267	46.6	37.5	241	8.28	93.9	604	167
679	1018	259	407	19.6	80.6	457	21.9	131	939	213
547	858	1843	2943	51.4	42.9	276	20.9	77.7	433	209
14.5	32.5	655	1186	16.4	50	375	1.42	35.5	211	90.6
77	124	284	523	11.2	85.1	599	15.5	186	1165	337
523	866	106	198	3.72	36.8	217	1	158	931	322
500	661	276	491	17.2	59.9	322	6.79	487	2890	573
231	426	223	379	6.1	106	509	10.3	91.4	567	200
359	615	604	1084	18.4	77	474	2.35	62.6	389	90.6
264	418	457	874	10.4	53.3	346	2.09	8.06	37.2	1037
328	557	939	1472	92.2	86.6	453	31.9	32.2	164	137
202	313	770	1298	27.1	183	1241	66.1	1094	5523	1219
557	922	337	567	17.3	53.8	331	16	108	573	130
131	239	172	319	7.84	37.5	221	11.3	96.5	583	246
85.1	137	311	533	16.5	28.1	123	6.98	717	3685	1075
121	165	743	1407	5.57	16.4	184	63.2	113	685	246
1794	2480	340	610	21.9	32.5	147	15.4	11.1	59.9	60.4
514	704	316	661	5.57	79.9	382	10.6	205	1263	562
991	1420	186	349	5.23	51.4	316	3.82	655	3249	1197
470	835	109	235	18.8	45.7	276	13.5	130	843	213
56.2	103	239	449	22.1	71.7	547	12.1	82	474	231
132	217	311	632	1.67	79.9	496	3.68	29.2	137	956
698	1124	155	286	12.1	75	410	26.7	25	115	40.3
73	112	108	244	10.3	25.3	110	6.38	71	483	189
269	414	179	328	1.64	95.6	615	17.3	56.7	349	533
257	396	235	385	2.71	105	594	39.6	45.7	248	81.3
259	372	118	193	1.26	26.7	184	1	239	1512	422
150	241	142	259	9.31	43.7	259	12.6	64.4	403	259
193	349	250	437	1.64	137	914	12.3	445	2329	2148
221	385	764	1310	9.31	47.8	229	17.8	16	61.5	1568
375	610	562	914	13.7	69.8	426	10.3	138	698	302
67.9	97.3	615	1230	17.9	10.2	84.3	50.5	160	882	219
286	449	337	632	15.1	24.4	175	3.68	41	262	215
294	519	379	737	10.3	30	175	6.15	92.2	632	269
102	181	898	1568	22.1	37.5	246	10	57.8	334	1252
155	184	308	500	18.4	51.9	368	8.2	179	1046	176
184	302	209	325	11.2	11	91.4	3.75	99.1	644	414
300	514	343	610	7.04	34	142	6.49	32.5	172	66.1
858	1358	244	437	19.1	34	127	7.04	48.3	300	69.2
284	528	223	379	8.13	52.8	233	11.7	947	4656	1731
262	355	813	1370	67.3	18.6	107	6.85	14.1	60.4	626
349	496	241	337	7.84	62.1	334	9.56	52.8	322	70.4
68.5	105	205	365	6.61	19.1	81.3	13.3	79.9	414	157
227	410	217	414	2.09	48.7	355	5.14	46.1	281	743
29.7	51.4	211	407	2.97	95.6	573	10.8	127	638	461
207	313	239	389	15.8	15.7	51.9	5.42	44.9	316	165
115	170	292	557	4	32.8	235	4.45	64.9	389	193
186	300	68.5	262	13.2	23.1	163	4.26	49.1	337	181
155	274	213	396	9.47	52.3	248	12.1	106	770	179
181	297	150	271	1	67.3	392	10.7	47	250	882
770	1197	264	392	4.83	21.3	150	15.3	81.3	433	179
110	186	33.7	59.9	37.9	106	667	13.8	123	667	271
578	1009	248	523	3.92	56.7	313	23.9	55.7	313	44.9
248	422	158	267	11.2	49.1	264	5.52	12.4	69.8	231
239	375	183	302	5.57	40.7	233	4.37	250	1407	505
178	294	528	973	16.5	21.9	83.5	1.08	51.4	322	340
167	289	308	538	3.05	29.7	164	3.4	820	4217	914
578	914	1382	2247	53.8	54.2	305	10.7	41.8	244	102
237	334	308	514	1	118	835	21.1	235	1358	632
340	483	176	311	2.53	73	496	13.1	173	1027	362
300	519	93.1	165	11.8	45.7	281	18.9	86.6	621	349
615	931	95.6	163	3.75	59.4	281	7.57	22.7	137	122
874	1370	407	655	12.5	50.5	379	2.48	98.2	557	215
209	322	95.6	188	4.37	81.3	588	16.1	73	426	289
67.3	113	269	1165	63.8	7.7	14.5	120	59.9	365	106
269	422	483	835	18.9	92.2	594	20.2	130	806	213
1009	1526	407	784	9.91	28.6	198	16	491	2738	1263
117	198	231	426	6.67	44.9	231	10.5	1018	5328	2148
96.5	99.1	200	340	3.05	69.8	491	12.4	509	2839	1252
235	316	110	167	3.75	95.6	578	9.91	92.2	673	292
547	931	305	483	11.1	50.9	286	1.84	65.5	372	322
184	311	102	193	17.6	119	704	6.26	93.9	594	233
491	813	638	1275	27.6	33.1	221	1	40.7	274	104
289	396	382	679	19.6	52.8	359	2.27	77	407	382
184	319	161	302	5.33	39.6	248	14.1	51.9	322	106
461	644	175	322	2.09	29.7	160	7.99	49.1	297	145
163	235	90.6	179	2	66.7	375	11.5	35.9	188	289
196	334	2666	4740	184	93.9	519	9.22	717	3555	3398
104	143	267	496	4.49	110	757	17.3	141	813	346
547	874	328	426	24.1	48.7	325	8.06	58.8	403	276
355	594	308	505	5.62	20.7	151	7.7	119	835	147
523	858	235	478	14.2	39.2	223	2.71	62.6	368	328
538	843	365	578	3.62	24.8	219	15.7	583	3051	1241
255	429	271	414	9.31	79.1	514	62.6	164	791	939
198	349	217	437	7.04	77.7	533	92.2	43.7	271	147
1999	3051	172	289	2.41	56.7	269	12.6	66.1	429	113
204	164	300	542	10.7	22.5	136	3.72	50.9	211	311
237	325	281	562	6.67	21.3	111	5.42	46.1	281	300
644	1084	500	851	11.2	45.7	365	1	71.7	433	359
588	874	308	583	11.3	89.8	583	11.9	57.3	313	219
1526	2371	229	396	9.31	27.4	198	5.67	49.6	319	79.1
1596	2267	426	843	25.9	54.7	346	14.7	138	947	372
253	325	274	449	26.7	27.1	137	3.37	120	791	219
410	717	189	375	17.6	10.5	8.9	13.1	184	1055	269
3368	4958	410	632	28.6	21.5	83.5	75	26.4	146	80.6
31.6	64.4	437	757	16.4	76.4	533	21.3	74.3	474	215
173	279	1446	2436	70.4	90.6	679	5.05	85.1	474	233
730	1208	233	379	9.47	51.9	163	18.1	196	1084	389
83.5	96.5	1263	2072	17.6	15.5	107	10	92.2	547	141
184	316	211	343	1.07	34.9	231	8.82	96.5	673	219
99.1	124	407	757	21.1	2.39	8.43	11.7	198	1197	316
355	632	1640	2480	118	43.3	286	10.6	115	667	355
264	407	165	470	108	56.7	403	9.91	31.9	244	87.4
392	604	64.9	110	8.82	172	1055	8.98	229	1370	392
474	750	52.3	82	3.46	47.4	255	7.64	858	4332	1027
956	1446	552	956	25.5	41.4	331	2.94	69.8	389	132
410	644	188	316	6.67	24.4	141	10.4	1046	5425	2267
108	179	799	1298	16.1	58.3	305	32.8	71.7	392	198
225	359	337	573	16.4	49.1	322	51.9	131	692	305
274	396	133	204	7.3	33.1	178	1.01	10.6	79.9	322
346	583	1911	2943	100	132	632	40	153	882	264
1512	2167	186	322	14.7	18.4	84.3	6.44	69.8	400	104
132	237	799	1407	18.9	28.4	178	9.56	93.1	519	262
97.3	161	181	346	4.78	50.5	352	1.63	542	3220	453
221	340	449	858	17.2	20.7	125	3.65	229	1219	806
255	418	233	382	8.35	58.3	325	5.23	64.9	500	135
150	231	186	328	7.77	48.7	284	2.94	120	621	898
253	403	95.6	164	11.5	74.3	542	16.5	60.4	340	136
922	1420	297	426	30.8	2.76	19.5	99.1	1046	5186	2247
211	284	284	599	11.1	112	655	34.9	63.8	362	175
97.3	64.4	91.4	170	7.17	147	914	11.8	67.9	433	202
167	253	205	379	8.2	13.3	73	12.7	53.8	294	191
632	1065	322	538	11.7	94.7	679	18.3	43.7	225	730
85.1	150	947	1596	18.6	87.4	562	10.9	61.5	426	313
205	334	87.4	151	6.32	225	1382	74.3	142	874	264
302	487	496	882	22.7	28.1	146	20.7	23.5	146	121
573	939	102	186	1.12	130	820	30.5	66.7	478	319
269	362	227	349	14.5	137	1000	30.2	259	1459	305
843	1275	146	279	10.4	64.4	400	4.91	64.4	418	142
1554	2187	723	1310	23.7	31.1	198	8.82	914	4656	874
193	237	289	478	8.13	8.51	46.1	81.3	32.8	211	35.2
274	396	204	355	2.02	75.7	372	9.22	55.2	311	233
562	843	547	973	13.5	50.5	294	11.1	53.3	349	175
382	487	359	573	7.7	42.9	264	3.62	91.4	578	211
1155	1700	255	466	8.66	23.9	130	8.74	73	457	175
1075	1625	155	289	5.38	17.3	100	13.3	139	882	178
294	400	183	325	3	27.9	176	2.53	157	890	365
644	1144	237	385	17.6	55.2	253	11.4	76.4	487	131
22.3	24.8	200	343	7.23	40.7	279	12.6	33.7	200	137
343	470	737	2035	93.1	69.8	478	17.2	193	1275	410
160	207	241	433	6.79	10.3	75.7	4.33	14.1	72.3	241
445	710	331	632	8.35	33.4	196	81.3	743	3924	1298
66.1	95.6	255	457	10.7	16.4	97.3	11.1	68.5	392	269
533	874	12.5	15.7	17.5	81.3	466	8.66	125	743	281
129	193	70.4	109	6.92	28.9	163	2.81	35.9	244	85.8
173	241	241	418	11.7	163	1046	5.88	1104	5989	2436
223	311	297	562	9.91	59.4	396	3.55	53.3	294	106
121	175	59.9	188	36.8	39.2	250	4.18	77.7	418	207
300	441	414	757	13.7	77.7	638	31.1	117	567	519
246	410	418	626	15	117	710	22.9	66.1	449	396
141	246	340	673	17.9	53.3	422	5.28	85.8	466	196
179	340	125	213	5.23	67.9	500	9.73	24.4	126	204
297	407	1894	2890	39.2	127	906	31.6	124	898	557
193	257	259	375	14.2	59.9	352	6.44	189	947	1134
414	626	213	346	10.7	5.19	29.4	86.6	68.5	407	205
91.4	106	316	573	3.75	125	858	73	86.6	594	292
90.6	133	956	1625	32.2	119	594	5.23	45.3	319	84.3
791	1298	255	441	10.3	79.1	407	82.8	334	1911	1134
679	1186	58.3	114	1	50	385	14.6	29.2	150	77
111	183	441	874	6.92	22.3	124	1	74.3	487	355
155	221	991	1685	30.8	53.3	305	18.1	189	1124	562
717	1144	155	239	1	66.7	509	6.44	94.7	514	661
890	1370	205	385	5.94	60.4	337	15	115	704	248
193	313	66.7	106	3.55	21.9	120	1.96	3.85	44.5	39.2
244	389	289	453	16.7	89	685	5.28	1134	5140	1827
160	231	229	400	14.5	74.3	567	4.78	164	1037	246
557	914	145	239	1	59.4	500	2.62	158	947	217
221	385	279	538	7.1	124	764	25.5	250	1298	157
259	396	183	322	16.8	8.51	63.2	67.9	37.9	202	132
368	557	655	1176	25.9	22.9	170	11.9	547	2969	874
102	127	189	313	12.5	27.4	179	3.59	533	3023	1046
2054	3106	509	965	18.1	35.9	225	8.9	40.3	207	157
407	594	313	567	39.2	40	311	3.82	75.7	496	147
737	1104	396	710	21.3	157	914	27.4	179	1046	302
165	209	487	1009	8.82	37.9	205	6.85	181	906	1486
311	461	191	382	7.17	26.2	153	16.7	50.9	300	183
1334	2091	757	1252	56.2	82	557	15.1	241	1420	297
188	340	115	225	13.6	41.8	294	13.3	38.9	205	39.2
1208	1794	784	1433	14.9	15.7	105	6.04	667	3368	813
1358	2091	179	300	10.6	14.2	111	10.9	106	655	157
109	149	362	644	12	105	710	13.6	31.9	188	215
271	426	143	233	8.13	34	167	9.82	51.4	305	131
115	173	316	604	10	52.3	313	2.44	72.3	418	281
151	264	375	632	25	56.7	362	4.33	219	1176	250
365	514	264	487	1.26	50.9	322	13.7	89	578	239
262	437	250	445	7.7	44.5	297	2.41	95.6	626	111
215	365	124	219	3.43	82	519	10.6	30.5	158	47
172	176	449	828	12.3	71.7	445	20.7	445	2393	1334
241	385	820	1554	15.1	34.3	205	5.73	62.6	300	264
217	385	246	457	8.98	20.7	150	4.87	79.9	445	750
1208	1778	1241	2110	44.9	52.3	264	9.47	129	777	906
227	346	189	349	3.52	42.6	211	12.9	176	1114	407
68.5	118	13.8	62.6	57.8	93.9	519	18.9	106	533	1700
189	325	188	352	2.19	115	673	8.43	53.3	334	138
331	500	644	1134	9.73	76.4	562	15.4	890	4179	1219
157	262	764	1486	12	77	573	6.98	764	3786	1540
542	906	125	219	1.88	19.8	111	3.96	48.3	267	186
750	1094	403	667	14.5	56.7	375	12.2	1124	5425	1981
491	704	138	235	6.92	112	750	13.2	79.9	519	237
1065	1625	396	704	13.9	127	799	5.57	71	457	66.1
487	784	170	313	13.3	40.3	157	12.5	24.4	122	151
209	294	119	215	1.72	101	599	32.2	66.1	343	352
538	1009	750	1370	20	46.6	267	1.84	48.3	279	221
262	346	138	219	7.43	38.2	198	7.3	35.5	165	284
246	302	750	1322	41.8	63.2	514	9.22	24.6	82.8	599
207	281	241	422	8.51	17.9	108	7.84	328	1762	491
284	470	281	461	11.2	79.1	557	9.82	66.1	325	19.8
257	294	1611	2595	57.3	37.9	200	85.8	81.3	478	828
124	184	78.4	117	12.6	122	890	41.4	76.4	466	183
843	1298	385	667	18.9	69.8	474	4	65.5	352	146
610	956	146	257	13.7	1.5	17.8	69.8	82	621	101
1124	1794	437	757	30.8	161	1018	15.4	51.4	337	209
621	931	64.9	157	13.3	29.7	175	13.9	64.4	349	168
313	500	68.5	101	11.1	11.8	83.5	132	33.4	150	151
710	1094	542	982	16.3	35.2	113	19.5	124	843	176
813	1358	146	322	250	124	737	52.8	65.5	382	130
1433	1928	1486	2308	28.4	122	777	5.42	225	1310	359
82.8	143	267	483	2.09	57.3	340	17.8	362	2072	1298
311	400	204	385	12	101	698	6.1	62.6	426	89
340	474	271	519	1.95	93.1	552	16.4	115	730	110
441	723	284	466	13	72.3	414	12	217	1124	764
437	610	34.9	57.8	47.8	79.1	649	15.8	487	2642	1346
175	294	259	667	27.6	52.8	233	18.6	57.8	343	188
108	139	1582	2227	47	48.7	340	13.2	54.7	349	117
466	743	151	271	1.93	70.4	346	50.5	83.5	552	113
297	491	328	632	29.4	62.6	375	11.9	63.2	441	179
644	922	215	382	6.32	59.9	422	7.99	126	710	195
368	588	313	523	9.73	59.9	331	9.06	57.8	349	207
104	161	286	519	7.1	149	939	18.4	43.7	257	588
1370	1860	1134	1860	55.7	56.2	362	25.5	112	615	68.5
262	389	131	219	2.71	41	213	19.6	791	4179	2148
221	328	255	478	7.7	39.2	213	8.28	85.1	496	198
250	365	437	799	13.3	57.3	355	18.1	172	1027	784
189	276	155	322	10.6	54.7	359	11.2	96.5	632	239
279	422	97.3	308	26.4	99.1	514	6.92	99.1	547	445
311	437	146	294	5.09	62.6	496	9.39	88.2	562	583
48.7	67.9	661	1197	36.2	44.9	319	17	82	552	281
269	346	449	743	21.5	31.3	198	75.7	57.8	362	154
209	264	343	621	9.56	54.7	362	10.5	69.2	414	294
221	359	368	661	7.57	78.4	487	3.65	85.8	466	179
1298	1827	239	426	20.2	62.1	410	12.2	77	483	279
764	1219	1263	2017	20.2	67.3	340	22.7	70.4	403	198
89.8	125	302	523	5.94	50.5	392	34.3	25.5	130	67.3
257	403	267	500	15	31.6	248	1.55	58.8	316	80.6
259	389	94.7	165	12.6	54.7	396	10.5	104	573	362
157	147	93.1	172	20	108	655	18.1	487	2642	632
429	673	1459	2350	31.6	204	1263	125	34.3	195	723
231	284	109	209	6.15	119	698	8.66	75	389	227
250	346	319	583	7.7	67.3	316	9.91	176	939	255
88.2	150	204	418	4.87	54.7	274	16.3	56.7	286	108
396	673	297	610	11.2	4.33	20.9	3.65	1018	5186	1554
441	770	231	375	5.38	25.5	154	10.3	59.9	349	92.2
167	313	193	368	12.6	55.2	274	17.2	50.9	279	150
98.2	193	115	225	4.57	93.1	791	36.5	69.8	453	139
311	519	205	359	4.7	75	466	12.6	102	615	233
1370	1911	22.1	54.7	57.8	104	538	19.3	1094	5328	1407
84.3	119	316	567	23.3	36.8	211	8.35	221	1197	1124
483	770	133	267	9.73	77.7	557	12.4	161	874	557
65.5	95.6	289	466	12.6	1.79	44.9	63.2	150	956	644
835	1322	91.4	181	4.91	59.4	429	5.28	126	820	207
334	573	1827	2943	68.5	65.5	491	2.89	70.4	457	154
813	1230	368	638	22.1	60.4	379	15.3	19.3	112	119
233	375	355	632	4.26	75.7	491	14.7	89	478	141
233	289	340	667	16.4	18.4	133	17.5	108	704	302
125	205	168	286	10.6	139	820	14.5	62.6	372	131
698	956	1334	2148	170	21.9	153	9.14	69.2	349	195
359	588	229	433	4.74	5.38	25.3	70.4	466	2525	914
441	723	150	274	11.5	33.4	217	6.67	64.4	337	229
97.3	136	403	757	5.57	3.08	35.2	103	528	2864	638
1715	2350	118	195	5.99	37.2	241	4.87	129	685	250
196	297	274	547	6.92	62.1	279	15.4	77.7	514	113
241	396	181	305	6.04	110	610	9.39	59.9	359	163
389	578	188	355	14.3	50	271	8.66	956	4914	1670
257	461	799	1370	56.2	7.43	17	1.19	66.1	461	255
2129	3278	483	965	17	73	396	13.9	85.8	599	209
173	235	115	195	5.83	62.1	365	7.7	45.3	279	75.7
866	1165	710	1055	33.7	44.9	264	8.66	186	1037	1037
225	334	189	337	7.37	158	1144	40.7	135	764	151
271	414	217	414	10.4	50	289	9.06	470	2788	1446
418	638	1611	2788	77	61	375	7.04	123	737	445
334	496	151	253	14.7	115	750	17.2	138	890	255
365	573	346	615	8.13	38.9	227	4.41	679	3460	835
195	337	179	319	10.6	77	478	17.5	46.6	90.6	500
150	267	132	255	6.67	8.06	67.3	1.06	50.9	281	202
389	626	1298	1911	33.4	67.3	519	30	50.9	294	189
375	547	281	414	5.19	50.5	294	7.84	225	1263	604
221	328	239	453	8.06	9.39	24.1	1.72	5.47	38.2	322
1186	1860	158	284	3.96	92.2	562	22.7	42.9	259	237
1382	1877	1075	1981	83.5	45.7	311	6.73	50	267	244
