# Supplementary material
Source: ML conference proceedings conference paper supplement (https://openreview.net/forum?id=nrbR2F29vU)
Supplement: supplementary_material [file 5. cd3cd28+psitect.xls]

## Sheet: Sheet1
praf	pmek	plcg	PIP2	PIP3	p44/42	pakts473	PKA	PKC	P38	pjnk
39.2	8.9	4.26	9.22	1.88	25.9	46.6	223	3.02	31.6	65.5
42.6	20.2	12.1	1.45	40	30.2	51.9	264	5.94	14.1	16.1
5.88	17.9	3.43	2.19	18.1	105	300	1928	6.98	20.5	12.9
34.3	18.8	3.65	1.7	16.5	352	519	1263	18.3	59.4	35.9
24.6	16	6.92	9.39	8.06	15.7	53.8	346	9.31	18.1	12.5
36.2	15.7	1	65.5	31.3	30.5	66.1	874	11.4	26.2	8.66
2.81	10.3	4.37	1	6.26	30.5	105	483	17.2	32.8	6.44
45.3	13.9	6.79	12.2	13.6	26.9	39.6	578	15.7	41	37.2
15.3	25.7	3.37	3.52	11.9	9.65	17.5	382	9.22	25.9	14.2
40.3	17.9	2.81	2.17	1	49.1	77	1568	17.5	32.2	5.23
64.9	54.2	1	21.5	7.7	1	1.55	50.9	12.7	37.9	2.67
30	22.1	4.87	1.12	9.22	3.92	46.6	173	17.2	25	10.6
30.5	22.5	13.2	1.01	21.9	22.3	36.8	223	12	26.2	25
25	34	2.29	1.01	15.1	7.3	16.1	276	13.6	38.5	60.4
28.4	19.8	10.2	4.57	30.8	6.38	18.1	973	21.9	47.8	18.9
65.5	56.7	1	2.41	2.05	126	204	2207	12.1	20.4	23.9
35.2	18.6	3.22	2.81	26.4	25.5	172	200	27.1	40.3	15.1
34.3	20.5	8.51	1	30.2	40.3	130	890	22.1	76.4	51.4
61	38.9	3.46	5.19	26.2	12	24.6	487	14.7	21.3	13.8
48.7	20.4	1.19	2.5	11.8	12.6	24.4	316	24.4	37.5	21.1
35.5	13.8	8.28	7.99	17.2	45.3	77	1526	42.2	110	34.9
31.9	44.1	5.42	1.31	6.32	13.8	13.3	349	12.7	23.3	9.39
42.6	25.5	7.3	1	21.5	33.7	49.6	396	59.4	85.1	19.6
78.4	21.9	9.31	4.66	44.9	10.7	26.4	866	17.2	21.9	7.84
44.1	24.1	5.38	132	16.5	18.1	37.5	1219	3.05	17.6	63.8
47.4	19.3	1	1.68	10.2	10.2	38.2	661	21.1	45.7	21.7
105	41.4	2.69	3.82	9.56	28.6	59.9	362	17	25.5	12
56.2	38.9	12	9.39	11.7	66.1	125	638	13.2	50	6.67
72.3	24.4	5.28	179	35.2	22.1	42.6	196	26.9	38.9	20.7
45.7	13.1	1.91	6.79	6.32	29.7	49.1	382	16.7	39.2	22.9
56.7	25.5	1.84	1	25.7	6.98	31.9	851	8.51	20.5	160
79.1	48.7	3.75	4.14	24.1	27.1	44.1	221	31.9	38.5	21.1
15.4	23.9	1.86	6.26	32.8	41.4	68.5	331	5.99	5.05	44.5
21.7	10.6	7.57	2.46	16.1	29.4	64.4	1155	30.2	77	28.1
36.8	22.5	9.65	1.43	3.13	15.1	58.3	75.7	13.2	26.2	12.4
52.8	17.5	5.94	179	14.6	11.5	22.1	457	13.9	39.2	18.4
30.8	11.1	2.86	1.06	18.6	24.6	44.1	500	19.1	37.9	21.3
21.1	20.7	22.9	4.66	13.1	10.3	22.1	334	20.9	32.2	15.7
26.4	24.1	9.39	3.31	24.8	14.5	41.8	906	13.1	30.8	10.3
36.8	25.9	10.2	1.96	35.9	46.6	111	947	23.1	50	35.5
20.2	15.8	9.06	4.45	9.91	19.5	110	1358	16.5	35.9	17.8
48.7	42.6	3.52	6.73	7.37	11.8	23.7	175	49.6	85.1	11.3
43.7	8.82	8.82	2.74	6.85	20.5	27.6	281	13	24.1	18.1
37.2	24.4	2.69	3	19.5	21.7	41	349	8.35	24.4	9.82
69.2	26.9	15.4	3.22	20.2	25	83.5	644	15.8	26.4	8.9
40	25.9	5.42	4.18	8.13	13	29.4	250	2.23	21.3	37.9
30.5	15.4	2.64	147	47.8	61	131	1778	21.9	44.1	18.9
40.7	14.5	2.37	1	26.4	23.3	54.7	813	15.5	21.9	16.5
56.7	31.6	9.31	2.89	25.7	49.1	104	698	3.4	4.45	1
86.6	125	8.28	10.6	47	73.7	170	3134	21.1	63.2	25.7
27.6	17.8	5.94	6.21	32.8	57.8	110	1084	6.15	27.4	93.1
63.8	23.7	20.9	17.5	12.1	34	52.3	355	26.7	51.4	33.4
31.9	20.5	1.79	165	72.3	17.2	33.1	723	15.5	37.2	79.1
48.3	18.3	2.31	2.09	18.3	16	24.8	392	24.8	57.3	23.5
43.3	15.1	1	1.32	6.1	44.9	78.4	1685	10	34.6	14.2
23.9	18.1	6.1	7.23	17.2	10	41.8	5.67	19.6	28.1	9.14
26.7	19.5	1	1.12	11.2	41.4	71.7	791	19.8	36.5	26.2
59.4	17.6	3.65	4.78	26.9	49.6	113	882	12.4	30.5	8.58
8.13	24.4	12.4	1.03	21.7	28.6	193	62.1	11.2	40	108
56.7	26.9	1.01	2.69	15.7	12.2	28.6	259	15.3	35.2	4.7
73	30.2	6.49	3.46	1	13.3	78.4	757	6.73	38.5	27.4
40.7	16.7	1.45	5.19	4.07	17.3	63.8	2054	3.13	18.6	65.5
46.6	15	6.04	4.03	3.25	2.5	2.39	36.2	18.1	43.3	8.82
47.8	24.4	1.32	1	3.65	12.9	24.1	474	15.4	24.1	10.5
20	21.5	3.37	1	21.7	16.1	38.2	615	20	39.2	50.9
24.4	17.3	1.06	40.7	13.8	14.5	26.2	286	14.9	29.7	12.2
19.8	16.4	3.25	6.98	16	46.1	95.6	487	2.71	92.2	5.52
64.9	32.8	4.91	1.09	1.58	14.2	23.5	429	12.1	43.3	7.3
53.8	38.5	1.45	255	52.3	28.9	61.5	422	10.9	26.9	5.83
75.7	31.1	5.23	1.01	18.1	10.8	32.2	483	2.74	12	54.7
87.4	44.1	1	1	13.8	13.1	32.8	235	38.2	75.7	34.3
41.4	21.9	20.7	2.55	18.8	10	26.7	414	3.46	19.1	30
44.5	25.9	13.1	6.67	17.6	86.6	165	1928	14.5	32.5	19.6
46.1	18.8	2.57	1.98	14.5	44.5	109	567	24.4	34	14.2
54.7	26.9	4.33	2.71	11.1	20.5	85.1	1322	17	35.9	15.1
119	39.2	1	6.26	21.7	55.7	149	1346	12.5	36.8	5.73
11.7	30.8	2.84	6.32	10.6	66.1	86.6	922	1.51	21.7	80.6
75.7	51.9	7.23	167	19.1	30	93.1	1860	1.78	30.5	39.6
57.3	22.5	2.11	2.55	7.64	26.9	48.3	313	21.3	52.8	20.4
16.4	21.5	5.52	3.85	22.7	12.2	69.8	1582	2.48	17.6	96.5
57.3	29.4	5.09	4.22	17.6	8.74	34.3	649	9.82	26.9	16.5
56.7	34	1	7.64	10.6	29.2	88.2	1611	5.57	34	106
89	58.8	4.96	1	11.2	14.3	28.1	319	2.39	19.1	70.4
47.4	25.7	6.49	1.95	1	60.4	176	1252	37.5	91.4	39.6
51.9	13.1	9.14	1.79	4.91	30.2	74.3	698	22.5	76.4	39.2
27.4	10.9	2.86	4.1	5.88	68.5	129	1459	20.2	35.9	8.9
83.5	33.7	1.42	1.01	12.5	74.3	119	466	11.9	31.9	6.1
13.8	12.4	13.9	7.3	12.9	5.42	16.1	588	15.3	42.2	10.7
59.9	20.5	6.92	1	18.1	15	28.6	313	23.5	66.1	18.1
56.2	20.9	8.43	2.86	1.93	25	54.7	1155	9.56	46.6	73.7
108	27.9	10.9	7.57	7.7	42.2	120	922	25.3	50.9	10.9
29.7	23.9	12.2	77	31.6	82.8	164	1827	20.5	30.8	17.3
62.1	17.3	5	1.01	2.07	17.8	36.5	271	13	27.9	7.1
47	20.4	6.98	3.85	12.4	8.98	20.2	474	44.5	129	44.1
88.2	84.3	4.87	1.01	6.79	28.9	40	956	31.1	66.1	26.9
38.2	20.4	15.1	4.91	19.8	45.7	138	2227	16.7	43.7	73
38.2	22.5	2.62	1	16.5	32.8	82.8	1165	3.49	20.9	44.5
61	31.1	1.89	1	28.9	50.9	82	538	7.5	18.8	10.4
20.9	15.8	1.04	1.3	17.9	16.4	24.4	262	25.5	53.8	28.6
52.8	26.9	17	1.15	35.9	8.74	31.1	717	15.7	28.1	21.9
64.4	19.8	6.61	1.42	10.7	28.4	40	334	3.02	21.5	62.1
48.7	18.3	6.79	1.01	13.5	11.5	22.9	359	21.3	42.6	29.7
58.3	15.5	5.94	1.25	2.97	25	52.3	365	2.09	24.8	74.3
62.6	16.3	5.28	2.64	1	23.7	44.9	173	20.7	31.9	21.1
62.1	24.8	2.86	1.01	12.1	74.3	145	730	16.1	35.9	5.83
29.4	38.9	3.92	1.19	4.22	5.78	30	914	37.5	66.7	19.5
139	50	1	2.59	11.4	18.4	44.1	292	17.5	47.4	118
173	164	7.57	1	3.52	14.3	26.7	491	1.18	704	77
21.7	20	7.04	1	1.88	27.6	52.3	346	14.7	35.5	17.3
71.7	30.5	1	2.74	11.9	53.3	151	1176	25.5	45.7	17.8
70.4	33.4	4.57	2.74	7.23	11.8	14.1	359	46.6	84.3	36.2
19.3	32.5	10.4	3.28	14.9	14.6	19.1	491	17.2	23.5	10.8
58.3	33.7	9.47	4.41	14.3	7.04	28.4	478	17.9	35.9	12.2
77	24.1	8.9	1.01	18.3	16.7	63.2	1252	15.3	33.4	6.92
75	24.1	1	2.09	15.8	68.5	132	2288	5.94	33.1	138
34.6	19.8	1	6.92	17.8	16.7	31.3	294	25.5	83.5	30
82	33.7	1.32	3.16	12.9	41.4	93.1	757	27.4	79.1	38.9
55.2	27.4	3.46	2.59	18.3	19.6	32.5	213	25.7	67.3	66.7
93.1	62.6	1.06	6.98	2.02	6.32	37.2	500	1.93	19.1	57.8
151	153	9.73	1.01	21.9	67.9	132	2571	90.6	114	25.5
93.1	66.1	2.44	6.21	2.5	66.1	129	1877	4.37	20.9	57.8
54.2	25.3	8.58	3.02	27.6	18.6	34.9	274	3.92	18.9	85.8
113	57.8	11.7	3.62	20	44.5	76.4	509	4.53	23.9	160
42.9	36.8	5.57	3.59	8.82	26.4	102	1446	17.6	30.2	15.8
26.4	14.1	10.7	5.99	5.62	8.06	17.5	392	16.3	45.7	15.5
138	176	14.2	1	7.3	38.2	58.8	246	63.2	87.4	16.5
48.3	26.4	2.67	6.49	18.3	90.6	248	914	5.88	51.9	119
54.2	19.1	5.42	2.11	29.7	104	346	2813	14.1	17.3	2.41
77	51.9	1.33	3.4	17.3	53.8	91.4	813	18.6	27.6	10.8
10.6	24.6	2.21	8.2	10	15	50.5	562	17.2	48.7	10.2
78.4	39.6	6.1	1.01	12.9	16.7	48.7	123	18.3	37.2	6.26
60.4	29.7	10.5	1	1	27.6	50.9	626	37.5	79.9	44.5
24.8	33.4	1.33	1.55	2.25	41.8	122	698	16.7	44.1	95.6
54.2	10.5	2.11	1.01	22.9	6.04	19.6	422	10.4	23.9	3.75
103	30	3.28	4.45	8.2	50	80.6	1382	1.73	19.1	79.9
16.8	23.9	5.99	4.91	14.3	6.98	52.3	547	1.25	10	46.1
84.3	40.3	6.79	1.01	17.6	19.6	37.5	246	13.7	35.5	78.4
56.7	38.2	2.11	2.53	12.9	16.7	38.5	523	30	69.2	42.9
49.1	29.2	2.53	1.42	5.73	18.6	48.7	1165	27.9	40.7	21.9
2.15	12.3	3.75	1.81	16.7	25.3	82	1000	19.1	39.2	10.9
139	48.7	6.04	1	31.3	11.5	34.3	87.4	12.7	29.7	14.2
48.3	23.9	6.26	6.04	10.6	18.3	44.5	710	2.69	19.1	47.4
10.1	16.3	5.38	1.23	21.1	13.5	34.6	289	26.2	51.4	22.7
82	62.1	3.96	1.08	13.6	2.59	30.2	27.9	2.39	17.8	84.3
12	17.2	4.83	3.85	2.29	5.83	23.5	931	55.7	99.1	26.4
28.1	17.6	1.63	1.01	17.2	19.1	28.1	221	42.2	114	73.7
87.4	20.5	4.18	1.03	1.36	59.4	161	1084	17.8	35.5	14.1
91.4	32.5	4.57	1	9.73	17.2	36.2	305	24.1	62.6	31.3
10.6	1.58	6.85	4.26	12	25.9	61	898	32.2	75.7	40.3
102	33.7	6.15	1.72	16.8	113	331	3078	12.6	31.3	13.6
33.4	17.9	5.83	1	13.1	6.67	40	313	5.57	28.6	67.9
55.7	40.3	15	1.02	21.7	69.2	130	1395	23.7	34.9	8.43
90.6	37.2	2.69	1.24	4.91	8.82	22.7	519	11.9	18.3	14.1
74.3	26.4	6.49	1.35	14.7	11	31.6	965	18.8	33.4	15.5
46.1	48.3	3.43	1.68	12	32.8	95.6	552	2.76	33.4	99.1
153	119	2.89	1	22.5	13.7	20.7	453	10.6	25.3	14.2
19.8	15.4	3.96	7.1	4.37	19.5	36.5	474	18.4	38.2	7.91
40.3	23.7	8.06	1	16.5	7.43	31.3	1094	13.6	30.2	11
31.6	16.4	1	2.25	1.01	21.3	47.4	1075	22.9	61	21.7
15	21.1	5.23	3.55	12.6	46.1	109	2548	2.25	5.42	5.83
77.7	21.1	14.3	2.84	28.4	27.4	44.1	205	12.1	23.3	12.2
58.3	23.5	5.28	9.73	29.2	20.4	44.9	649	10.1	22.7	14.5
50.5	24.4	4.18	1.19	12.3	17.3	45.3	1407	13.7	35.9	12.9
123	68.5	1.73	1.33	5.67	18.1	36.2	382	9.91	18.9	9.91
55.2	16.7	1	1	8.28	30.2	111	1407	4.74	12.6	76.4
82.8	27.6	1	2.17	15	5.52	22.3	487	16.1	39.6	6.79
46.6	9.31	1	5.73	19.1	23.9	40	308	12.2	28.9	4.29
66.1	71.7	5.09	2.44	21.1	43.3	108	1911	38.2	84.3	27.4
51.4	24.8	18.8	9.82	25.7	24.1	47.8	1114	3.28	18.9	56.7
61	22.7	4.18	5	1.61	12.7	22.9	221	16.1	30.5	13.8
95.6	43.3	1	1.93	16.3	9.06	37.9	578	16.8	34.6	21.1
42.9	26.9	1.01	1.23	11.5	26.2	34	340	13.9	26.2	12.1
86.6	53.8	1	4.37	20.2	45.3	130	1000	32.5	59.4	17.6
73.7	34.6	3.11	158	32.5	25.3	44.9	264	2.53	15.8	64.9
106	46.6	2.57	2.97	22.5	10.1	37.5	610	1	55.2	4
18.8	25.7	5.47	3.92	31.9	10.2	15.7	352	11.9	40.7	33.7
27.6	34.6	1	1.01	12.2	5.88	16.1	385	14.9	23.7	15.8
63.2	71.7	8.43	1.96	34.6	73	179	1625	15.5	29.4	10.9
47.8	34	7.57	2.84	24.4	21.5	42.9	257	11.5	33.1	9.47
74.3	24.4	2.21	1.98	16	67.9	121	227	7.5	18.9	83.5
93.9	40.3	5.14	2.81	33.4	18.8	39.6	241	22.5	35.2	15.8
62.1	20.2	7.77	1	11.8	31.9	47.4	235	27.1	73.7	18.8
89.8	42.9	8.06	1	9.39	20	28.4	400	28.1	63.8	24.4
55.7	62.6	2.19	5.52	34.6	11	78.4	2763	48.3	102	41.8
90.6	31.6	18.4	5.14	29.7	27.6	48.7	193	38.9	85.8	57.8
13.1	31.1	11	1	21.9	11.5	27.1	400	2.46	23.9	68.5
66.7	23.7	3.28	1	20.4	9.22	53.3	828	13.8	52.8	130
15.8	25.7	1.27	3.08	16.7	37.2	61	414	19.6	31.3	12.3
17.2	37.2	14.1	3.31	28.9	13.5	31.6	491	26.4	77.7	29.7
90.6	45.3	12	1.01	30.5	28.1	48.3	229	1.45	48.7	3.89
14.1	11.5	3.19	1	20.9	12.4	126	189	23.3	34.3	17.6
85.8	21.3	1.57	1.41	5.05	63.2	181	1731	23.7	50.5	150
61	17.6	1.6	1.05	4.78	34.6	66.1	410	44.1	121	90.6
132	172	2.15	2.25	8.66	16.4	33.1	426	38.2	64.9	21.9
62.6	37.9	1.18	1.95	14.5	17.3	32.8	372	1.02	26.7	52.8
44.1	40.3	1.54	1	20.2	70.4	126	615	31.1	74.3	40
107	129	15.8	1.03	10.9	49.6	99.1	1298	28.4	50.9	31.1
54.2	14.9	9.39	1	13.5	35.2	101	813	13.2	40.3	21.5
33.1	26.4	2.17	1	14.6	21.7	41	947	7.04	27.1	9.39
23.5	18.6	4.91	2	6.55	23.5	66.1	2187	19.5	31.1	6.38
57.3	28.9	1.01	5.52	5.88	19.5	34.3	215	3	16.1	68.5
61	19.6	2.74	1.06	12.3	12.4	26.9	300	4.57	10.4	69.8
38.9	17.9	2	3.19	25.7	4.53	28.1	685	27.6	56.2	21.5
97.3	47	1	2.15	26.7	38.2	137	2017	17.8	37.2	22.7
118	104	16.8	2.13	16.5	27.6	38.9	403	30	51.9	17.5
53.3	28.9	4.45	3.43	18.3	9.06	21.7	470	13.2	27.6	8.2
445	89.8	1.01	3.62	14.1	12.1	34.6	931	22.3	45.3	11
38.2	15.4	6.1	3.68	29.7	10.5	31.3	604	32.8	85.1	27.1
56.7	25.9	1.83	3.96	21.7	13.5	26.2	698	22.3	53.8	4.26
75	54.2	11.2	2.09	12	17.3	34.6	519	5.78	37.5	154
19.6	27.4	5.88	1	29.4	42.6	89.8	1275	40	93.1	51.9
59.4	30.5	4.7	1.53	12.9	29.2	75.7	267	15	24.4	4.57
72.3	15.1	7.43	5.83	31.1	20.2	33.7	302	34.9	73.7	35.2
49.6	25	3.85	1.1	17.2	4.26	6.98	181	3.89	20.9	90.6
85.8	37.5	1	1.01	9.14	45.7	70.4	225	28.9	73	50
46.6	17.3	6.98	1.18	2.81	117	223	528	25.7	36.8	29.7
67.9	35.5	5.47	1.89	14.1	18.1	131	129	19.1	47.4	18.9
28.9	22.9	1.31	1	6.73	11.8	30.8	496	14.3	37.2	9.56
96.5	60.4	1.76	1.14	9.14	31.3	158	1084	36.2	67.3	33.1
77.7	26.4	2.46	5	10.1	46.6	65.5	292	15.4	42.2	22.1
40.7	19.1	1.55	3.96	4.03	27.9	46.1	281	23.7	30.8	27.4
73	43.7	3.59	1	18.8	131	231	1186	9.14	18.1	11.7
37.9	21.3	5.28	1.01	18.9	37.2	56.2	292	3.46	9.82	59.9
88.2	45.3	11.1	1	17.8	37.5	75	1186	37.5	64.4	14.9
15.4	23.7	4.91	1	2.25	34.3	62.6	1778	19.3	51.4	21.9
72.3	50	5.28	1.01	25	34.3	90.6	1322	33.4	65.5	27.6
85.1	23.5	8.74	1.01	18.6	8.28	23.3	717	4.18	9.73	4.14
18.3	14.2	3.85	7.99	18.4	50.9	105	1009	37.9	56.2	23.1
62.6	25.5	7.1	1.06	3.34	21.7	34	300	7.43	38.9	54.7
8.2	17.9	1.03	1.55	21.7	41.8	106	1747	29.2	51.9	16.7
88.2	29.7	13.8	3.25	13.2	31.6	58.8	667	22.3	45.7	13.8
10.8	23.5	7.37	10.1	12.2	19.1	43.3	1018	15.1	23.9	18.3
54.7	24.6	6.92	1.15	17.8	47	95.6	1877	1	1	7.7
57.3	23.7	7.1	9.65	9.22	44.9	126	1186	3.49	18.4	77.7
28.1	44.1	1.08	3.62	9.65	43.7	87.4	552	12.7	25.5	6.73
21.1	15.8	7.43	2.48	21.5	13.8	36.2	784	25.3	45.3	82
78.4	57.8	5.57	1	2.89	5.38	17.8	704	18.8	29.2	8.9
6.98	28.4	9.73	1	6.85	34.6	66.1	355	23.3	42.6	22.9
65.5	22.5	1	1.01	11.5	61	95.6	956	14.9	30	21.1
58.3	24.6	4	4.96	24.1	5.94	34.3	874	4.14	16.8	109
16.1	15.3	1.11	1	14.3	10.5	48.3	1762	4.22	20.5	50.9
34	29.4	3.22	2.76	9.14	19.1	30	441	20	45.7	13.6
14.3	16.8	1.81	5.73	27.6	12.9	33.7	523	47.8	106	58.8
68.5	28.6	1.86	1.91	1	20.5	41.4	305	26.4	58.8	32.5
63.2	29.2	2.46	1.91	1.42	25.7	54.7	337	33.1	79.1	31.6
100	57.3	6.21	1.24	26.7	23.5	34.6	308	12.7	22.5	2.07
103	41.4	6.04	10.5	12.9	5.73	22.1	500	21.1	44.1	24.4
62.1	22.5	10.7	1.68	17.5	91.4	165	470	11.9	25.9	15.3
81.3	47.4	1.08	1	9.06	7.64	35.2	743	19.3	39.6	21.3
69.8	19.6	1	7.7	16	74.3	161	737	12.9	32.5	13.7
42.9	20.9	4.7	1.25	26.2	24.1	65.5	806	3.16	12.6	85.8
72.3	75	3	1.98	6.55	54.2	118	1027	27.9	67.3	27.1
47.8	18.9	6.85	5.23	2.94	35.5	74.3	906	24.4	71.7	19.6
73	40	5.73	1.01	31.6	34	84.3	1685	3.55	30	93.1
46.1	35.9	11.3	1.27	11.9	37.2	97.3	764	17.2	42.2	11.7
9.47	4.57	1.47	5.05	4.18	311	644	1946	13.1	30.2	13.3
75	28.4	6.67	7.17	18.4	13.2	139	132	17.5	39.6	8.74
25.9	42.2	2.86	1.01	21.3	11	25.9	429	25	43.3	5.47
40	30.5	10.6	35.2	34.3	33.7	95.6	2666	24.8	42.6	13.1
51.9	17.8	1	1.01	10.3	36.2	72.3	2091	8.2	17.3	32.8
95.6	61.5	11.2	1.01	38.5	18.4	53.8	483	3.34	8.28	40.7
49.6	18.1	10.9	2.33	25	20.2	35.2	355	13.8	25.9	7.91
359	365	13.3	1	32.2	11.2	20.4	491	13.5	39.2	13.6
71	47.4	2.97	3.11	16.5	27.6	35.2	241	1	68.5	4.29
62.1	37.9	1.5	1	10.4	67.3	135	730	11.1	21.7	8.2
4.18	21.9	4.49	2.23	15.4	46.6	97.3	2035	21.7	45.3	19.1
14.2	7.1	10.6	4.14	9.91	34	55.2	308	21.5	64.4	21.7
73	22.1	9.31	1.01	12.4	28.4	38.2	349	13.7	31.3	17.2
23.9	22.5	2.27	2.57	13.8	46.6	82.8	588	1.7	53.8	2
15.7	16.3	5.38	93.9	22.7	32.5	66.1	655	42.2	107	34.6
36.2	39.6	1.86	5.42	1	40.3	101	1219	35.2	77	32.2
69.8	21.9	9.47	1.01	17.3	24.6	61	297	9.73	28.9	13.1
48.3	19.1	5.83	1.01	16.4	41.4	130	799	30.5	55.2	25
138	125	6.85	2.55	9.31	9.06	5.38	133	18.9	38.5	3.4
62.1	39.2	4.66	3.37	8.13	28.1	69.2	1275	28.4	50.9	14.2
63.8	24.1	1.01	3.13	26.7	15.5	73.7	2110	1	2.94	3.16
95.6	52.3	5.99	1	30.8	6.38	20.2	26.4	23.7	31.6	29.2
7.84	26.2	10	8.43	16.7	7.37	14.6	248	13.2	23.1	30.5
50	17.3	1	3.34	20.7	14.9	34	316	18.1	52.8	33.4
12	12.4	4.66	1	3.08	26.7	65.5	982	30.5	38.2	9.31
71.7	30.5	11.8	1.01	16	34	58.8	567	24.1	50	23.3
17.8	24.6	1.23	1.01	13	8.82	23.5	843	11.3	44.9	86.6
34.3	30	1	1	19.8	58.8	114	882	23.3	56.7	44.1
27.1	24.8	14.6	2.39	23.9	12.3	71	1420	2.33	22.9	77
55.7	34.9	1.75	3.92	5.62	44.5	79.9	1055	26.9	45.7	17.5
70.4	32.8	1.04	1.88	8.74	20.4	43.3	730	12.4	21.3	1
54.7	28.1	1.15	4.61	26.4	28.1	46.1	375	51.9	67.9	1.67
30.2	24.6	6.67	1.79	1	20.5	43.3	491	2.29	6.85	4.18
7.43	29.4	8.51	1.42	4.78	37.9	97.3	1700	6.73	12.6	5.52
42.2	40	3.96	1	13.2	29.4	47	474	25.5	47.4	21.9
29.4	22.1	3.85	3.68	7.04	29.4	73.7	1176	10.1	25.7	14.2
130	117	7.77	1.06	27.1	34.6	58.8	418	3.46	20	95.6
97.3	51.4	7.91	2.05	13.6	14.1	29.4	491	91.4	139	28.1
77	91.4	1.54	1	17.6	31.1	36.5	316	14.9	36.8	8.58
26.2	15.5	7.7	3.79	17.5	14.7	36.2	372	7.17	8.66	1
44.1	15.3	3.43	2.41	5.88	17.5	43.3	349	35.5	83.5	37.9
61	32.2	3.22	1	11.3	22.7	45.7	281	9.31	18.4	5.52
82.8	50.5	8.2	1.96	18.1	32.8	55.2	422	18.1	33.1	13
120	35.9	4.91	2.97	16.7	18.8	34	372	16	34	6.04
51.9	46.1	13.2	1.01	18.4	6.73	13	474	24.4	50.5	77.7
18.4	18.1	6.49	1	9.73	8.2	25.3	547	8.35	25.5	2.44
154	53.8	6.44	1	6.21	33.7	57.8	1165	13.9	13.8	6.92
47	27.1	5.83	1.01	14.1	11.3	39.6	723	29.4	48.3	27.6
92.2	31.6	7.77	1.58	4.83	17.5	24.1	655	19.8	40.7	5.83
64.9	24.6	4.33	1	17.5	6.1	19.1	757	26.4	50.5	10
37.9	18.4	4.33	1.25	12	34	100	914	6.44	30.8	108
37.5	29.7	1.81	1.01	5.62	27.9	50	289	14.7	28.1	1
63.2	34.6	5.52	2.41	24.8	17.8	32.8	717	15.4	25.9	17.6
8.98	22.1	7.99	3.62	7.43	78.4	145	673	6.85	19.8	1
42.9	15	1.15	1.01	22.5	5.19	19.8	588	32.2	59.9	14.3
69.8	20.4	5.23	1.01	2.84	56.7	127	698	16.7	32.8	17.6
12.9	20.4	3.19	1.01	8.2	8.66	31.9	655	18.8	31.3	11.7
106	24.1	4.53	1.01	17.9	61.5	111	1670	32.8	79.9	26.7
59.9	23.7	1.6	3.02	16.5	17.6	42.2	269	18.9	41.8	18.1
172	33.1	5.88	173	47.4	24.1	32.8	279	31.9	56.2	28.9
39.6	18.1	4.83	1	21.7	13.7	35.5	198	32.5	84.3	60.4
20	23.1	2.55	3.22	22.5	17	62.6	1252	3.52	36.8	67.9
59.4	26.9	14.1	2.13	14.2	41	89	632	18.1	44.1	26.4
82	26.2	1.01	1.3	12.1	27.4	69.8	1762	34	50.5	8.51
65.5	35.2	7.37	1.72	9.39	8.98	22.7	474	9.73	25.5	14.7
100	44.5	1.01	6.32	10.6	24.8	51.9	487	2.55	9.82	48.3
122	46.1	1.32	1.33	16.4	46.1	91.4	2350	22.9	46.6	15
55.7	22.9	3.22	6.67	12.7	14.9	53.3	1055	17	35.2	9.56
100	57.3	4.26	1.01	13.3	11.7	29.2	322	21.1	31.6	13.7
20.7	13.6	8.43	5.33	4.22	18.9	56.7	2458	9.39	19.8	1.98
103	35.2	1	1.01	11.8	13.7	25.5	382	14.9	25.5	8.28
67.9	20.4	1	2.27	10.9	18.4	30.8	205	13.2	40.3	17.3
106	26.7	10.4	1.08	1	21.9	37.2	264	17.9	35.9	37.9
98.2	30	5.47	2.27	11.7	3.46	19.6	820	40	71.7	40
74.3	21.5	1.75	1.12	3.28	18.1	71.7	1999	29.2	52.3	9.06
45.7	34	5.47	3.34	8.06	14.9	20.7	225	14.2	39.2	20.9
65.5	31.9	4.41	3.46	9.56	43.7	79.1	922	28.1	50.9	27.6
67.9	24.6	2.5	1.01	12.7	21.3	44.9	523	26.7	47	10.1
94.7	36.5	6.79	1.23	5.47	14.6	30.2	567	113	175	37.9
56.7	31.3	7.77	4.07	8.98	80.6	143	557	15.7	37.2	15.1
55.2	24.4	1.73	6.38	9.65	14.3	29.7	328	2.46	13.7	75
14.1	19.1	3.37	2.13	6.61	7.04	26.9	704	27.6	44.9	11.3
75	18.3	3.28	1.01	15.4	24.6	38.5	175	15.5	33.4	89
89.8	42.9	6.32	1	3.75	20.7	44.9	271	21.1	38.5	13.1
68.5	25.7	3.4	1.25	5.73	7.84	20.7	27.6	16	33.4	11.8
1.12	22.7	6.38	1	14.2	25.3	42.2	449	24.6	50.5	13.1
43.7	28.4	10.2	1.23	14.6	17.8	39.6	337	19.1	41	12.7
10.5	23.1	2.62	1.05	13.7	18.1	40.7	289	24.4	49.6	43.3
47.4	16.3	1.84	1.95	7.77	32.5	57.3	445	20.5	42.2	22.9
53.3	21.5	6.85	2.92	39.2	19.1	55.7	679	64.9	114	47.8
41.4	24.1	11.8	1.55	8.35	9.91	58.3	389	2.59	16.1	79.9
259	172	1	1.41	15.5	21.5	42.6	407	39.2	73.7	48.3
99.1	46.6	5.33	1.3	20.5	10.9	32.5	466	7.04	21.9	2.67
58.3	27.6	7.7	4.29	6.55	6.55	15.5	28.9	16.5	31.1	16.1
54.7	33.4	9.73	2.17	19.8	46.6	85.8	604	31.6	54.7	26.4
49.1	18.8	5.94	3.62	2.86	85.1	130	1027	15.4	42.9	67.9
62.6	38.5	8.43	3.79	7.57	143	211	874	29.7	48.7	14.6
53.3	30.5	3.55	9.31	15.3	36.2	86.6	2035	32.5	77.7	23.3
71	23.7	12.7	3.31	12.2	8.74	17.5	547	12.2	29.7	8.9
170	43.7	1.86	1.95	3.02	34.3	81.3	67.3	42.9	92.2	63.8
61	14.9	3.31	2.53	22.1	19.6	47.8	237	2.67	18.6	13.7
77	17.8	1	5.19	1.79	39.2	69.8	1134	2.37	19.3	57.3
22.5	22.5	10.5	2.67	13.5	10.4	26.2	449	13.7	23.7	7.37
66.7	27.9	4.1	1	17.5	18.1	28.1	410	5.14	11.2	86.6
12.2	10.4	7.23	1.26	11.3	8.74	30.5	179	22.3	42.9	16.3
73.7	18.9	3.68	1.36	18.8	7.84	16.5	433	1	9.47	4.91
98.2	31.9	12.5	2.86	21.5	12.1	38.9	35.9	39.6	96.5	34.3
10.5	13.6	2.33	1.01	10.1	15.5	35.5	400	25.5	47.4	25.5
82.8	30	9.82	5.23	23.7	7.99	20.5	610	16	42.9	23.3
12.5	14.3	1	1.01	2.81	41	61.5	311	13	31.3	15.7
64.9	34	2.31	1.45	19.1	7.5	16	400	3.65	23.7	62.6
18.3	15.5	3.05	4.53	25.7	30.2	56.7	1486	29.2	69.8	26.9
57.3	33.7	1	2.84	8.9	79.9	153	1219	6.21	13	5.19
59.9	35.2	8.66	1.33	14.9	6.79	29.4	12	14.1	36.8	13.3
49.6	15.3	1.39	1.01	28.6	24.8	71	2035	9.73	23.1	26.9
17.9	18.1	4.1	1	20.9	24.1	35.9	302	18.9	40.3	13.5
69.8	32.8	3.62	1.68	10.2	11.9	26.4	426	1.93	20.7	44.1
40.3	26.2	6.67	1	12.5	11.2	44.5	784	18.4	33.7	12.5
79.9	27.9	3.89	1	13.8	49.6	139	1144	13.6	30.5	8.06
93.9	34.3	1	1	7.7	8.82	24.4	632	5.62	12.1	115
106	26.9	6.26	3.22	4.87	12.4	37.2	514	25.5	39.2	9.47
7.1	21.7	4.49	2.97	18.4	21.9	101	1230	22.5	48.7	34.6
57.3	29.7	2.02	2.86	15.5	12	21.5	259	11.1	22.1	11.1
67.9	53.3	4.83	4.74	5.38	63.2	112	1486	39.6	65.5	29.7
14.1	33.7	1.43	1	16.8	33.7	57.8	410	7.37	24.4	7.43
56.2	26.2	6.85	3.25	13.2	68.5	121	626	28.1	73.7	45.7
93.1	30.5	1.72	1	16.5	6.73	34	717	50.5	107	59.9
50	31.1	1.86	1.79	7.64	19.1	33.1	267	3.34	21.1	56.2
41.8	23.1	1	1.06	12.1	20.5	33.1	292	35.2	66.7	25.9
170	142	26.7	170	39.2	39.2	75.7	874	10.7	20	9.56
61.5	37.5	4.78	2.25	18.8	21.3	30.5	274	11.2	17	6.1
108	46.1	5.88	1	9.56	26.4	28.9	316	36.2	68.5	54.7
80.6	18.6	2.29	1.76	8.43	25.3	49.6	313	31.3	76.4	9.82
10.6	17.5	1.57	1.84	14.2	15.1	48.7	1512	31.9	57.3	9.14
71	22.5	10.7	1.53	31.3	16.1	34.9	429	3.34	9.22	5.99
16.7	13.3	6.73	1	7.77	22.9	38.5	403	1.78	3.4	6.15
161	42.2	5.94	1.75	1.49	7.3	15.4	750	17.5	31.3	20.4
61.5	25.5	6.15	2.46	13.3	34.3	56.7	365	2.53	17.2	54.7
31.9	23.7	1.25	1.7	18.4	39.2	61.5	604	20.5	38.5	16
19.5	7.43	1.41	1.13	13	23.5	43.3	385	26.2	52.3	36.2
50.5	19.6	3.37	5.67	1.93	20.7	36.8	429	17.5	41.8	10.5
41.4	18.3	3.68	4.26	17.5	20.2	29.4	385	30	62.6	30.2
50.5	21.3	4.18	3.08	16.1	13.9	31.6	505	17	36.5	14.3
36.2	31.9	1.23	8.74	9.22	8.13	24.1	355	25	58.3	31.9
86.6	35.2	4.87	1.91	1.54	85.8	184	1208	7.43	30	107
92.2	63.2	3.52	3.34	19.5	11.2	31.1	457	19.8	29.4	12.1
36.8	17.9	2.48	4.14	12.9	39.2	63.2	858	28.1	46.6	6.73
71.7	21.9	2.27	5.05	11	26.9	47.4	334	37.9	69.2	20.4
80.6	31.9	8.82	1	14.2	20.9	36.5	433	37.9	62.1	16.4
13.6	40.7	2.15	5.09	13.7	19.6	31.1	257	24.4	41.4	27.9
55.7	31.6	6.79	250	82	7.64	18.1	514	22.3	41.8	14.7
23.7	14.7	1.21	2.48	1	7.99	19.8	487	26.4	58.3	23.1
58.8	17.3	5.28	1	1.1	46.6	53.8	259	27.9	80.6	184
36.8	14.1	6.98	1	8.28	14.3	36.5	500	53.3	101	77.7
67.9	19.8	1.33	1	5.28	20.4	32.5	305	34.3	58.3	21.1
47.4	25	1.01	2.15	34.6	28.9	61	1778	16.8	33.1	27.9
11.1	13.8	14.7	5.09	9.47	44.1	86.6	723	26.4	84.3	48.7
57.3	17.9	6.55	1	14.2	11.1	30.2	667	17.6	44.1	30.8
64.9	26.7	1	1	22.7	40.7	73	2054	2.76	13.7	47.8
67.9	39.6	15.5	6.61	17.5	18.8	42.6	18.1	37.9	86.6	35.9
77	30.5	4.49	2.46	18.3	24.6	41.8	302	13	18.8	50.9
91.4	30.8	7.64	5.94	10.1	6.32	10.5	300	6.49	13.7	56.2
8.2	12.2	1.58	5.88	11.2	11.3	19.1	328	2.94	12.3	25.7
69.8	24.8	1	2.69	17.9	29.2	61.5	1134	21.1	32.2	17.5
37.9	19.5	1	2.94	6.38	93.9	168	661	4.83	23.5	69.8
8.35	13	5.83	1	32.2	24.8	38.2	308	2.69	9.73	27.6
161	113	3.82	2.11	17.9	28.6	64.9	523	17.6	42.2	13.6
44.1	26.9	8.2	1	10.8	4.26	20.2	667	23.7	75	16.3
64.4	25.9	5.78	3.62	18.6	10.4	40	820	20.7	40.3	13
54.7	11.8	4.18	1	31.1	66.7	154	1928	20.7	57.3	23.9
59.4	36.2	9.47	6.44	9.56	79.1	145	922	32.5	66.7	36.8
88.2	34	1	167	35.2	19.8	41.8	241	1.64	12.2	42.9
56.2	47.8	7.57	3.65	8.58	5.52	10.9	167	36.2	69.2	21.7
27.6	21.3	4.26	1.88	11.9	9.39	19.6	828	5.78	13.6	78.4
78.4	31.6	6.49	3.43	2.79	10.9	25	414	11.7	34.3	73
70.4	40	2.57	1.65	3.43	23.5	42.9	392	2.39	11.4	43.3
80.6	30	18.8	1.65	15.4	19.8	54.7	281	21.5	41	13.9
88.2	37.5	7.3	1.57	1.79	71.7	186	1197	28.4	44.5	15.5
43.7	37.2	5.38	2.27	8.2	6.1	13.8	567	11.5	35.5	13.2
133	102	6.73	1.01	9.14	79.1	139	750	1.83	31.1	97.3
14.2	25.5	8.2	1.01	22.7	57.8	87.4	1027	14.7	37.9	6.04
56.2	24.8	3.75	5.05	10.9	12.7	30.2	229	4.66	14.9	65.5
91.4	22.5	1	2.29	7.91	5.78	13.8	874	18.6	33.7	12.2
70.4	31.9	6.61	1	12	45.3	101	2187	11.7	27.6	16.1
118	59.9	9.47	2.94	6.73	18.9	59.4	692	33.4	51.9	31.9
55.2	22.1	1.11	1	2.35	18.4	50.9	389	8.28	41.8	87.4
60.4	57.3	7.23	1	8.43	93.1	165	1946	5	16.7	78.4
72.3	22.1	3.55	1.01	13	10.3	25.5	334	4.18	21.1	83.5
58.8	35.9	2.84	7.37	16	22.9	32.5	294	20.2	40	11.5
121	38.9	15.4	25.3	24.6	27.6	45.7	346	15.8	40.3	13.1
132	55.2	17	6.79	13.3	9.39	25.9	523	25.7	58.8	27.9
111	36.5	6.98	1	15.3	28.4	54.2	211	4.66	33.7	100
11.3	21.3	1.54	1	16.1	64.4	120	615	18.9	37.2	23.5
54.7	16.1	5.09	5.05	22.5	7.64	18.3	500	24.4	42.6	11.1
89.8	38.2	12.7	2.64	18.1	21.3	47	319	12.4	21.9	12.3
79.1	16.5	6.1	1.64	15.5	7.99	29.4	385	32.2	67.9	21.7
65.5	36.5	2.79	1.93	16.1	26.7	41	289	1.7	15.8	57.8
328	346	1	1	23.3	13.9	38.2	271	41.4	78.4	19.8
90.6	25.7	7.37	1	25.3	7.37	20.7	379	29.2	71	118
119	76.4	7.04	2.17	8.98	24.8	41	343	7.5	54.2	48.7
67.9	26.2	2.44	1	16.3	34	74.3	594	22.1	42.9	6.1
56.2	8.98	8.9	5.14	35.2	17.8	60.4	1370	25.9	37.5	11
25.5	16.8	10.6	1.01	11.8	48.3	117	453	40.3	75	63.8
47	83.5	8.82	2.59	3.68	24.4	40	227	24.1	30.5	14.6
36.2	16.7	6.73	3.85	18.9	34.6	57.3	632	2.69	25	91.4
62.1	36.8	10.8	2.17	14.2	15	32.5	382	21.7	42.6	23.1
32.8	22.7	8.66	1.57	18.3	41.8	52.3	349	18.4	41	22.7
32.2	16	1.89	1	22.3	9.06	23.3	403	5.83	21.3	62.6
110	53.3	3.89	1	14.3	12.5	33.1	292	31.9	75.7	69.2
114	157	14.7	3	34.6	9.31	16.5	523	18.4	42.6	15.4
41.8	18.8	18.8	7.43	25.3	10.7	19.6	429	21.3	55.2	18.1
102	26.4	8.13	1.08	19.6	51.4	89	982	40.7	92.2	54.7
93.1	27.1	3.79	1.75	20.9	17	29.7	583	35.5	61	32.2
106	23.9	8.74	1.18	28.1	8.51	26.9	717	17.8	32.5	14.2
75.7	31.9	4.91	4.96	18.8	37.2	66.7	610	24.1	58.8	43.7
123	70.4	9.06	1.01	14.1	25.7	47.4	239	20.4	44.9	24.4
47	26.4	1.79	1.02	25.7	36.2	85.1	1611	29.4	58.8	21.3
70.4	47.4	3.37	1.23	13.7	13.5	20.4	621	30	71.7	139
60.4	14.6	3.55	1.57	4.03	6.04	7.04	28.6	15.3	31.6	8.2
101	32.5	9.39	1.29	13.9	13.8	41.4	478	24.4	53.8	96.5
82.8	23.9	10	7.17	13.8	32.8	40	215	3.25	13.3	77
85.8	30	11.5	1	11.9	8.9	20.9	567	19.5	37.5	4.57
20.5	17.9	1	4.83	26.4	12.6	19.8	372	12.1	34.3	14.5
18.1	23.9	3.49	1.01	8.28	19.5	46.1	418	6.85	25.7	83.5
88.2	27.1	12.2	1.01	3.59	20.5	29.7	392	16.1	41.8	18.1
103	44.1	3.52	1.38	19.6	10.5	20.4	396	15.5	36.2	32.8
33.1	17.3	5.52	3.68	6.85	5.67	34.9	491	20.7	33.7	21.7
10.5	23.9	3.34	2.86	26.4	5.62	28.4	777	25.3	58.8	31.9
77.7	29.2	1.01	1.2	14.7	8.82	32.2	523	12.5	31.3	132
52.3	29.4	3.13	1.23	1.93	51.9	147	939	11.9	24.4	12
42.2	37.9	2.74	1.01	33.4	15.3	27.9	599	22.1	53.8	15.3
71	30.8	8.43	4.03	15.1	12.5	35.5	164	3.05	18.9	89
53.8	38.2	8.43	1	24.8	22.1	45.7	257	7.77	4.91	62.1
77	34.9	1.47	1.68	19.1	34.9	63.2	1486	52.8	85.8	30.8
14.2	12.5	9.73	1.01	13.5	21.7	51.9	319	1	47.8	4.1
34.3	21.7	10.5	1.35	14.5	20.9	32.5	264	4.61	20.5	50.5
77.7	43.3	5.52	1	3.72	22.9	41	239	15.7	36.5	7.84
66.7	42.2	8.66	3.65	13.3	19.3	71.7	692	18.8	47.4	10.9
67.9	30.8	6.73	1.22	17.3	62.6	104	547	1.72	42.9	3.31
62.6	14.3	2.92	3.11	9.22	17.5	34.9	578	15.3	42.2	9.56
60.4	19.8	1	1.95	34.9	4.78	21.1	692	33.4	83.5	30.2
82.8	37.5	1	7.3	1.12	15.3	24.6	396	14.9	34.9	8.98
79.9	64.9	6.61	1.01	1	20	33.1	334	11.7	24.1	6.61
77.7	35.2	7.17	1	15.4	22.3	46.6	300	5.42	23.5	100
98.2	28.9	6.61	1	9.91	50	105	533	2.48	29.7	56.2
75.7	23.9	1	1.64	26.9	19.3	34.9	311	21.9	41	16.1
67.3	26.9	8.66	9.91	22.5	33.4	102	737	62.1	111	61
84.3	47.8	14.9	48.7	34.3	26.9	38.5	267	24.4	58.3	42.6
89.8	21.9	13.5	2.31	22.5	16.3	58.8	2227	21.5	48.7	20.5
91.4	26.7	1.38	2.39	13.1	17.2	32.5	186	15.8	50	18.4
66.1	25	6.61	2.84	7.91	11	32.5	297	34	70.4	47.4
71.7	53.3	4.29	6.1	48.7	12.3	25.5	337	15.4	34.6	9.22
170	41.8	5.52	1.41	23.9	24.1	37.9	286	1.39	30.2	4.53
37.2	17.9	10.9	1	23.3	27.4	44.5	313	5.09	18.8	50
69.8	29.4	8.35	1.39	20.7	3.75	8.06	302	20.5	46.6	9.39
50	25.5	2.04	72.3	28.9	31.1	63.8	1843	20.5	34	7.1
74.3	35.5	5.73	3.52	17.8	18.6	32.8	244	5.99	23.7	111
79.9	58.8	7.99	2.64	3.34	10.6	23.9	392	47.8	69.2	35.5
73	29.7	5.94	4.29	12.3	13.6	145	154	23.7	48.7	15.5
39.2	20	3	3.28	18.8	30.5	65.5	1670	36.8	87.4	92.2
111	107	4.53	5.38	9.06	12.3	20.2	319	2.35	105	5.28
50.9	30	12.1	1.79	21.7	1.64	20	770	29.2	66.7	18.8
26.4	25.5	10.6	3.28	36.8	25	41.8	292	16.3	39.6	15.4
89.8	57.8	4.7	1.15	18.1	22.5	40.3	271	10.8	22.1	9.47
78.4	43.7	3.75	4.7	11.7	17.2	31.9	211	74.3	112	28.9
53.8	17.5	4.83	1.01	4	41.4	71	1197	5.14	16.7	71
7.57	32.2	8.43	1.01	7.5	14.1	30.5	305	34.3	63.8	14.9
20.9	23.7	11.9	4.22	24.8	87.4	161	685	10.6	25.5	14.2
75.7	23.9	6.44	1	20	15.7	34	474	24.4	55.2	21.1
66.1	34.9	15.7	6.67	18.8	14.9	31.6	281	4.96	28.4	89.8
51.4	18.1	9.14	1	6.73	24.8	51.9	337	24.8	70.4	59.9
130	49.1	13.3	6.21	3.79	43.3	79.1	770	2.79	17.2	65.5
132	77	2.19	1.61	5.52	6.92	19.8	379	14.6	34	14.3
62.1	14.7	4.83	1.39	10.2	26.2	43.3	523	21.9	28.6	11.5
13.1	10.6	6.85	2.92	5.05	23.7	40.3	340	4.53	23.7	111
53.8	26.2	5.09	1.06	1	13.8	29.7	294	12.6	28.9	6.38
54.2	23.1	5.78	2.64	7.43	34.3	59.9	466	2.09	56.2	4.22
61	18.9	5.42	3	11.1	13.6	16.3	426	20.4	50	17.9
54.7	18.9	3.02	4.37	13.8	21.7	35.9	235	14.1	25.7	10.8
66.7	19.3	2.46	1.06	25.3	10.7	36.2	422	11.8	25.7	9.91
75.7	29.2	2.13	1	18.6	10.5	14.3	276	58.3	85.8	30
52.3	15.1	12.1	5.52	7.91	7.23	17	328	1.19	9.39	53.3
77	28.6	11.2	3.28	16.4	14.6	35.9	355	25.3	41.8	13.3
46.1	18.8	1	6.15	9.65	26.4	46.6	239	11.2	27.4	9.91
175	77	3.72	2.33	11.3	10.1	26.9	588	24.4	37.5	25.7
28.6	27.6	8.28	1	14.9	12.7	32.5	615	14.6	31.9	9.47
96.5	40	1	3.25	15.1	27.1	48.3	757	24.8	43.7	20
103	35.2	7.43	6.49	20	46.1	88.2	626	1.73	75.7	3.34
6.67	12.9	2.15	7.99	17.2	11.7	49.1	514	4.66	24.1	63.2
13.3	20.2	8.2	2.17	21.7	6.44	28.4	23.5	12.2	23.7	7.3
145	53.3	7.7	1.39	1.84	50.9	113	843	22.3	44.1	64.4
14.5	20.7	1.38	5.62	26.9	24.8	38.5	284	58.3	161	40.3
97.3	36.2	1.76	2.11	21.3	2.31	22.5	426	3.46	34	95.6
18.6	17.8	1	1.01	18.4	26.4	32.2	264	30.2	52.8	25.3
63.8	22.5	4.74	1.11	20.5	13.7	28.4	528	11.5	20.2	1.68
85.1	21.9	1.08	1	7.5	8.74	18.8	355	5.83	17.9	103
69.2	16.4	5.99	1.21	13.7	14.7	34	281	2.27	19.8	83.5
79.1	41.4	1	1.72	7.77	6.98	22.7	604	14.2	25	14.6
83.5	19.5	7.57	1.08	2.76	17.9	33.4	316	16.7	26.9	15.4
1.46	3.82	5.52	5.83	11.8	53.3	107	1843	21.9	61	19.1
87.4	22.9	2.23	1	13.7	9.47	14.7	478	10	24.4	9.56
73	61.5	9.47	3.96	15.4	7.17	13.7	241	36.5	76.4	49.1
90.6	59.9	8.51	2.74	8.13	9.91	31.6	704	14.5	36.8	74.3
50.5	20.9	1.88	1.91	14.7	34.3	107	1055	4.66	32.5	115
141	139	8.58	1.01	12.3	7.84	25.3	791	20.9	41.4	18.6
12.9	12.7	5.33	3.22	13.7	51.4	81.3	673	16.3	39.6	19.1
176	36.5	1.32	5.88	20.5	11.8	33.4	255	17	33.1	29.4
32.2	13.2	4.14	2.41	15	14.6	28.6	638	54.7	73	23.9
17.6	8.2	4.61	1	6.79	24.6	51.4	193	20.7	33.7	4.87
61	47	4.53	1.35	7.57	26.2	51.9	355	40.3	75.7	45.7
49.1	34.3	3.28	1	2.19	23.5	38.2	264	36.2	62.6	95.6
31.6	8.66	7.99	1	8.06	37.9	84.3	1611	8.51	56.2	239
117	56.7	6.98	3.52	11.1	10.9	40	982	7.17	15.1	22.9
84.3	46.1	4.45	1.01	11.5	5.99	14.1	18.6	21.1	59.9	274
42.9	12.2	13.1	3.82	18.6	45.3	75	655	4.61	9.31	8.58
73	25.5	2.41	1.23	18.4	21.7	50	533	19.1	31.9	19.3
79.9	52.3	6.67	1.68	2.67	9.91	23.1	509	73	142	30.2
58.8	13.1	10.4	1.01	5.47	23.1	43.3	334	6.04	24.6	95.6
19.6	27.1	14.9	1.01	18.4	29.4	48.3	359	8.82	33.7	66.7
51.4	16.3	1.27	4.07	13.1	25.7	44.1	274	15.1	34	9.65
34	13.8	4.7	6.49	21.3	16.3	45.7	403	4.91	18.6	61.5
71	21.3	6.73	2.81	12.1	44.9	71	319	19.8	37.2	25
114	26.2	10	3.05	4.29	18.9	36.8	331	3.65	33.7	89.8
49.6	30.5	7.3	2.02	5.47	21.1	41	237	14.5	34.9	10.5
53.8	21.3	4.26	1.75	7.57	4.87	5.99	453	15.4	26.4	9.82
36.2	17.8	5.14	3.43	9.65	14.7	31.6	385	15.7	31.1	11.2
81.3	64.4	2.04	1	15.5	44.5	89.8	583	11.2	43.7	6.04
93.1	32.5	4.91	8.58	27.1	21.5	49.1	1346	11.8	37.9	75.7
30.8	16.7	7.37	3.02	9.65	18.6	31.6	297	22.1	29.7	7.1
80.6	32.5	9.73	1	13.3	25.3	28.4	229	32.8	47.4	10.7
59.4	15.3	1.01	2.37	19.6	15.7	41	269	11.1	22.1	6.44
59.9	24.1	1.68	1.49	2.46	25.5	52.8	382	9.22	34.6	94.7
66.7	18.8	4.7	1	5.78	41	89.8	1655	25.5	48.3	13.9
74.3	18.6	3.4	1.01	7.7	20.2	36.8	235	30.2	79.9	75.7
14.6	25.7	3.46	1.01	22.5	26.9	44.1	246	30.5	50	16.1
81.3	30.2	5.09	2.89	15.4	14.7	29.7	644	4.1	14.7	22.5
35.5	22.5	5.14	1.01	19.8	46.1	94.7	1596	5.33	25.5	89.8
41	9.31	1	1	5.67	28.6	40	274	18.8	59.4	23.3
81.3	38.5	8.43	1.12	1	16.8	36.5	519	27.6	52.8	13.1
73.7	38.5	11.8	1.01	8.2	26.4	54.7	991	12.9	42.2	12.5
17.8	19.3	16.3	2.07	20.4	7.84	7.5	375	25.5	47.4	12.3
59.9	48.3	18.9	23.9	29.2	5.88	31.1	750	10.3	39.6	196
107	32.5	4.87	1.91	7.1	2.84	16.5	491	28.4	67.9	25.5
7.3	11.9	6.38	4.57	10.2	11.2	19.3	528	9.91	35.5	37.5
58.8	22.7	3.28	3.46	7.43	12.3	36.2	267	3.31	25	75
52.3	12.2	7.04	2.84	31.1	16	41	505	11.3	33.1	6.73
61.5	23.1	8.74	7.3	9.65	13.7	39.2	400	29.7	46.6	16
53.8	23.5	2.48	5.83	4.26	41.8	55.7	209	12.1	21.9	15.3
94.7	44.5	5.05	2.59	19.1	30	53.3	610	27.1	52.3	13.8
63.8	28.4	2.59	7.91	4.41	3.92	27.6	843	2.57	10.8	8.2
33.4	33.1	7.37	3.96	1	71	120	305	15.3	42.9	82.8
60.4	22.5	2.41	3.34	7.3	17.5	20.5	284	42.2	89	70.4
63.2	25.5	2.09	4.7	4.96	66.1	132	770	18.9	38.9	95.6
77.7	24.8	5	1.01	6.92	18.8	28.4	221	9.91	16.5	8.28
59.4	27.4	5.38	2.48	5.52	8.74	13.6	461	12.3	19.8	12.7
15.5	11.7	2.25	2.44	20.5	23.7	49.1	233	10.2	53.8	67.3
18.6	11.3	2.59	1	1.19	15.4	24.4	426	20.4	44.9	8.98
16.4	20.4	3.46	8.98	7.3	25.9	28.1	279	4.37	24.6	93.9
18.4	31.9	1	1.65	1.31	30.2	60.4	1176	6.26	23.9	101
59.9	13.8	2.11	1.88	10.9	50	97.3	1946	2.46	7.17	79.1
87.4	25.5	5.99	1	4.57	43.3	89	1843	7.1	63.2	20.5
36.8	19.6	1.84	2.71	10	8.2	23.5	449	2.86	22.9	106
17.5	19.3	4.41	1	4.61	4.83	19.6	750	4.22	18.8	93.9
44.9	30.5	8.43	6.79	22.3	3.22	25	820	12	31.9	18.9
42.2	21.7	8.13	1.02	1.83	14.1	19.1	302	25	38.5	16.3
69.8	22.5	5.73	1.01	16.1	35.5	45.3	313	20.7	53.3	20.5
4.45	6.1	8.2	1	50	17.6	19.5	437	15.5	34	22.7
13.1	27.9	12.4	1	10.8	39.6	112	743	22.9	32.8	21.7
90.6	36.5	8.9	1	1.96	7.99	14.3	328	15	29.4	14.7
85.1	16.3	3.16	1.09	6.92	63.8	179	898	4.37	14.3	77.7
63.8	27.4	4.57	1.76	15.4	3.43	19.8	362	36.8	82.8	28.6
11.1	18.4	6.44	1.01	19.1	20	38.2	368	27.9	54.2	38.2
74.3	28.4	11.5	4.26	16.5	142	191	466	2.59	10.9	69.2
87.4	41.8	1	2.71	9.82	30.2	63.2	396	1	106	10
89	24.4	2.62	2.15	4.61	6.55	25.5	25.3	14.7	41.4	6.04
121	77.7	3.55	1	14.5	6.61	19.3	661	26.2	42.6	14.3
63.2	27.6	10.4	21.1	35.9	7.17	45.7	1358	5.73	49.1	142
63.8	30.8	4.91	1.02	11.9	84.3	150	453	37.5	69.8	42.6
77	33.1	5.19	4.07	16.7	13	32.5	441	25.3	50.5	22.9
9.14	8.66	5.88	8.2	21.1	37.9	76.4	685	23.1	34.9	17.3
51.4	20	6.79	1.01	11.9	10	29.4	410	21.3	33.1	20.2
73	25.3	14.9	4.66	48.3	4.7	22.1	478	27.9	43.7	7.77
93.9	34.9	5.52	1.89	5.23	45.3	141	922	24.8	53.8	30
49.1	25.3	6.92	1.14	14.3	12.3	37.9	784	29.7	75	34.6
43.7	18.6	2.84	1.01	14.3	24.4	57.3	890	6.26	2.46	3.72
55.7	33.4	1	6.67	7.43	20.4	40	610	30	46.1	10.7
62.1	23.1	3.52	2.79	39.2	11.3	15.7	400	2.79	34.9	66.7
51.9	27.9	17.8	83.5	47.4	32.2	106	1382	14.5	27.1	13.7
30	7.64	8.28	5.52	18.9	22.5	32.2	322	22.5	42.9	24.6
9.39	26.9	13.8	2.46	16.3	15.5	26.9	237	11.4	20.4	18.8
38.2	16.1	14.6	1.54	23.9	29.7	48.3	302	19.6	58.8	29.7
66.7	27.6	1.41	1.01	28.1	20.5	34.9	233	7.23	47	161
38.2	19.3	10.5	2.79	16.7	16.7	31.3	717	12.9	33.7	9.56
33.7	13.3	4.14	1	17.2	18.9	37.5	375	1	66.7	13.5
15.1	17.2	6.61	1.93	16.4	26.4	44.1	281	3.19	17.6	50.9
60.4	22.9	9.06	1.01	2.55	21.7	41.4	233	13.3	38.2	10.9
31.9	12.9	6.32	3.92	6.26	53.3	102	906	32.2	63.8	107
76.4	41.4	5.88	5.14	12.9	62.1	117	445	12.7	23.7	3.85
50.5	24.1	3.89	5.23	26.4	41.8	102	777	9.73	30.2	12.4
55.2	18.8	6.04	5.99	13.9	29.2	60.4	445	13.5	30	6.79
66.7	20	11.5	4.14	10	5.47	21.3	422	11	35.9	82.8
42.2	32.8	2.27	3.28	24.6	42.6	124	1252	36.2	75.7	107
38.2	19.8	14.9	1	5.78	4.57	38.2	573	20.9	52.3	17
66.1	18.8	1	1.68	15.5	12	17	418	11.5	29.2	7.64
56.2	20.9	7.43	1	18.9	10.9	27.1	449	19.5	30.5	9.65
175	99.1	7.99	6.61	2.5	37.2	66.1	552	19.6	29.7	28.1
17.5	30.5	13.2	3.28	20.5	13.9	20.2	271	8.43	25	88.2
82	43.3	1.86	1	13.2	19.8	54.7	2167	11.2	17.9	8.74
52.3	9.39	1.6	4.66	10.5	12.1	43.7	474	17	29.2	11.7
17.9	16.8	9.65	8.06	14.3	19.3	31.6	710	23.3	47.4	20
44.1	17.6	3.65	1	24.1	18.4	57.8	835	30.2	46.6	8.58
66.1	23.1	3.08	1.23	22.7	28.4	55.2	982	6.73	36.5	81.3
18.1	18.9	9.31	1.75	10.1	21.5	37.9	255	5.57	12.7	5
78.4	20.5	2.94	3.11	27.9	14.2	28.9	496	8.98	27.6	82.8
7.04	19.5	9.14	1.06	13.1	13.3	30.2	710	28.1	44.5	11
71	26.4	3.19	2.81	1.47	28.1	47	346	24.8	41.4	33.4
17.2	23.5	4.03	1.41	23.9	19.1	34	267	5.94	15.8	86.6
87.4	30.5	10.3	1.57	18.6	26.7	40	334	33.1	73	34.3
35.2	21.1	14.5	1.11	6.61	11.3	30.5	922	12.6	37.9	6.85
74.3	25.5	2.92	1.01	15.3	4.07	35.5	487	7.37	27.6	58.3
45.7	19.6	6.44	5.83	11.8	3.75	23.1	588	18.4	43.3	75.7
56.2	16.4	8.58	4.49	5	17	127	982	15.4	30.2	12.9
56.7	32.2	1.01	1	1.75	3.68	14.2	449	11.8	32.5	6.85
33.4	55.2	5.38	4.37	10.2	23.5	47.8	316	21.5	46.1	9.56
79.9	53.3	10.3	1.19	12.7	33.7	56.7	231	24.1	49.1	17.2
86.6	58.8	5.42	2.94	12.4	18.9	33.1	478	18.3	35.2	7.1
42.2	21.7	13.1	14.5	10.2	34	67.3	331	28.9	55.7	19.1
47.8	29.7	11.4	6.85	11.9	18.1	29.7	259	7.77	21.5	5.19
3.28	7.57	6.04	4.07	11.5	30	86.6	1065	19.1	44.1	17.8
29.4	8.43	7.91	1.43	14.6	5.62	23.9	644	17.8	32.8	16.8
40.3	22.9	1.45	1.01	5.28	25	37.5	355	33.1	63.8	33.7
82	89	2.46	1.01	11.8	14.5	33.1	610	16.1	32.2	19.8
41.4	28.6	6.92	2.37	4.96	30.8	61.5	638	11.4	23.3	5.52
10.1	26.4	2.81	1	16.5	23.1	50.9	557	35.5	77.7	38.2
73	31.9	5	1	10.4	22.9	46.1	300	5.05	25.9	71
55.2	76.4	8.13	2.86	16.1	8.98	26.2	514	25.3	48.3	11.4
54.2	16.4	12.2	1.12	8.98	11.5	39.2	375	23.9	35.5	15.5
56.7	18.8	5.47	1.86	9.06	9.06	20.9	552	1	33.1	79.9
36.2	44.5	33.7	147	66.1	18.3	28.9	188	2.35	18.6	67.3
74.3	23.7	9.39	5.99	7.99	37.2	63.8	956	4.53	15.8	89.8
21.7	36.8	4.07	1	23.1	34.9	62.6	379	33.4	71.7	18.3
88.2	42.9	11.4	167	41.8	20.2	40	322	13.1	31.1	9.65
66.1	19.3	10.8	1	16.7	13.9	38.2	255	16.1	30.2	11.2
67.9	32.8	2.17	1.01	7.04	9.82	36.2	615	26.9	40.3	9.14
37.2	15.3	18.9	23.1	19.1	15.8	33.4	284	27.6	32.2	13.5
73	41.4	2.94	2.48	5.14	51.9	101	890	27.1	62.6	18.8
64.9	43.3	6.1	1	28.4	10	22.9	491	12.2	25.9	6.61
35.5	14.5	4.96	5.57	5.19	6.92	41.8	65.5	22.3	54.2	35.9
10.4	9.82	5.94	1	16.7	28.1	49.6	331	6.26	24.4	10.5
85.1	20.5	3.02	1.07	17	7.99	23.1	316	49.1	68.5	16
63.8	34.3	3.34	1	14.3	15	63.8	931	1	20	67.9
3.62	2.15	2.46	3.65	10.5	38.2	93.1	2054	13.7	16.4	9.56
39.6	20.4	4.91	1.01	8.43	13.6	26.2	136	3.49	12.6	62.1
43.7	12.5	3.62	2.69	6.73	6.1	28.1	583	30.5	49.1	15.8
61	28.9	10.3	1.01	20.7	111	184	491	12.5	37.2	7.1
23.3	27.4	9.06	1.01	6.92	25	77.7	478	39.2	109	26.2
64.4	15.1	3.49	2.19	1.96	28.4	90.6	1860	23.7	39.6	23.5
34	14.7	2.48	2.64	16.1	44.1	85.8	1114	1.86	19.5	25.7
72.3	50.9	2.92	2.84	13.7	31.6	62.6	474	16.5	30	4.78
63.8	21.7	7.77	1.58	21.5	14.5	28.1	382	14.1	33.1	19.6
76.4	18.6	6.44	1.47	21.3	47.4	119	2393	2.64	17.5	62.6
191	67.9	1	1.37	1.93	43.3	63.2	552	10.1	34.6	12
30	16	10.3	7.57	2.23	28.4	54.2	791	8.2	16.5	9.82
61.5	23.1	1.46	1.13	1.04	11.8	30.8	547	18.8	36.2	13.7
23.7	22.5	6.15	2.44	13.7	5.52	38.2	552	37.5	86.6	58.8
90.6	36.5	4.74	1.01	19.6	23.3	30	271	26.9	40.7	16.3
27.4	26.9	8.2	2.62	8.51	18.9	37.2	246	36.8	67.9	34.9
59.4	32.8	7.17	7.23	21.5	9.56	29.4	246	56.7	108	64.9
1	7.5	17.8	4.74	12.4	6.67	32.5	552	5.09	32.2	57.3
16.1	17.9	1.83	1.01	10.3	53.3	94.7	542	17.6	42.2	16.1
55.7	31.6	8.06	2.69	16.5	9.31	28.1	1009	10.9	31.1	13.7
34.6	15.4	1.24	4.14	16.5	18.1	30.8	241	12.5	21.3	12.6
57.3	33.4	4.87	1.01	10.5	10.4	47	1407	45.3	50.9	21.7
57.8	22.9	4.57	1.6	32.8	6.15	14.1	255	8.2	42.2	264
67.9	36.5	14.5	5.14	10.3	45.7	80.6	898	18.4	34.3	22.3
78.4	42.6	8.28	1.5	20.2	49.6	97.3	784	13.7	19.1	9.06
31.3	16.7	10.2	5.09	20.4	22.5	48.3	828	6.21	24.1	94.7
7.5	22.3	7.99	4.1	13.7	15.4	21.7	211	40.3	76.4	27.1
38.5	23.9	1.37	2.21	4.29	33.7	61	730	10	17.9	6.44
77.7	75	8.43	1.14	30.5	25	55.7	316	42.9	61	14.1
46.1	39.2	6.38	1.14	14.3	3.02	19.5	828	3.02	16.5	83.5
82	26.9	3.31	8.13	23.5	8.13	23.7	610	20.4	33.7	22.1
85.1	24.1	5.88	2.29	18.8	11.5	22.5	437	5.47	42.9	90.6
80.6	45.7	2.31	3.46	19.6	29.2	27.9	334	11	24.4	18.1
82.8	25.7	7.3	1.86	10.7	9.14	23.3	349	20.7	44.9	23.7
60.4	35.5	6.92	1.39	13.7	20.2	67.9	1512	37.2	40.3	11.2
129	62.1	8.13	1.01	24.1	120	217	679	15.7	39.6	13
66.1	28.1	11.5	3.82	8.35	2.81	11.5	319	21.9	40.3	22.1
52.8	27.1	3.31	3.89	2.64	21.9	44.5	426	12.2	33.7	4.14
37.5	26.9	15.4	1	1.63	13.2	55.2	1382	26.2	47.8	31.6
57.8	34.3	4.87	1.95	14.6	16.8	32.8	289	13.2	23.9	22.1
129	51.4	2.07	4.41	9.22	25.5	33.4	227	1.78	39.6	8.51
30.2	20.5	3.13	8.74	3.59	12.3	27.4	349	22.3	43.3	5
72.3	20.9	3.59	1.01	24.6	78.4	138	1486	32.2	45.3	15.1
58.8	34.9	3.49	368	39.6	17.8	27.9	331	23.3	51.9	98.2
71.7	27.6	4.91	3.96	8.35	21.3	34.3	274	30	63.2	13.3
54.7	19.8	3.19	1	23.7	16.3	176	113	11.8	53.3	78.4
25	25	15.3	2.29	32.2	20.9	41.8	227	5.28	20	82.8
21.7	11.8	2.84	2.29	9.91	21.5	37.5	267	31.6	63.8	67.9
59.4	31.1	6.61	1	1.53	16.4	23.7	379	1.58	8.13	2.55
41.4	24.4	2.41	1	12.7	67.3	135	626	18.3	29.2	13
47.8	25.9	7.17	1	16.5	23.1	40.7	379	3.43	30	4.07
21.1	18.8	4	3.85	3.11	55.7	85.8	433	50.5	109	52.8
45.3	19.8	16.4	4.78	8.35	6.44	17.5	610	12.6	24.8	10.9
66.7	30	1.54	7.99	25.3	30.8	50.5	289	11.2	18.4	4.1
38.5	22.9	7.17	4.61	22.9	103	229	594	29.4	64.9	4.96
122	33.7	1.29	4.87	11	3.92	20.7	269	19.1	38.5	14.1
37.5	23.9	7.1	4.41	5.67	10.3	19.6	292	29.2	42.2	18.8
81.3	24.6	1	5.42	11.2	6.49	18.6	466	20.4	42.2	25
30.8	20.5	8.06	1.47	28.9	29.7	47.4	655	12.6	31.3	7.7
30	19.6	2.76	2.37	1	20.7	36.5	835	23.3	42.9	24.4
20.4	45.7	2.89	1.31	6.61	20.5	40.3	250	10.7	46.6	94.7
11.1	41.8	4.26	7.77	9.22	19.1	27.6	209	1.91	85.8	3.16
176	93.9	7.04	3.92	13.7	28.6	41	250	11.9	23.5	15.7
53.8	23.1	1.05	1.39	29.4	4.26	24.4	449	10.5	27.9	5.23
44.5	23.7	6.79	3.4	12.5	31.9	57.3	221	46.1	65.5	38.9
61	53.3	8.74	1.01	19.1	5.88	37.5	1334	20.2	36.8	9.91
66.1	19.5	1.75	1	17	3.11	5.33	188	18.9	38.9	12.9
59.9	31.9	1	1.01	20.9	24.6	41.4	239	17	28.6	13.6
50.5	29.7	5.09	3.19	11.1	25.7	60.4	426	2.25	5.09	79.1
69.8	22.3	14.2	2.64	16.3	37.2	102	2738	25.7	57.8	37.5
106	30.2	1.01	5.14	10.6	14.9	30.8	457	3.96	34	114
6.1	35.9	11.7	2.84	4.61	150	229	784	16.7	32.8	88.2
9.73	17.5	4.18	5.62	4.66	22.3	36.5	322	23.1	62.1	79.1
47.8	34.3	11.4	6.98	25.7	49.6	98.2	538	22.5	31.9	8.28
103	69.8	33.1	7.77	42.9	16	44.5	1114	25.3	43.7	12.7
74.3	38.5	3.11	1.01	12.4	15.4	34	538	30.2	64.4	23.3
72.3	18.9	5.94	5.67	2.44	9.31	23.7	557	46.1	77.7	32.8
11.9	49.6	8.35	3.08	8.2	29.2	202	191	13.9	37.5	10.4
31.9	12.9	1.98	1.01	3.75	47.4	103	1928	50.5	109	55.2
48.3	19.1	3.08	1.96	8.13	13.8	44.9	1134	22.1	41.8	6.92
75	27.1	2.46	1.01	17.3	38.9	92.2	770	21.9	35.5	21.9
74.3	26.4	7.7	7.3	1.58	10.6	25.7	400	8.43	18.4	6.61
58.3	27.9	8.43	1.01	4.66	22.9	54.7	346	14.9	24.6	6.26
49.1	23.1	1.83	1.7	15	47	104	2072	39.2	73	38.5
79.1	23.5	5.23	4.66	15.3	15.8	32.5	379	25	57.8	29.2
104	64.9	11.9	1	23.5	54.7	112	704	17.6	36.8	12.3
42.9	39.2	10.9	3.31	12.3	36.2	76.4	487	13.7	31.3	11.1
87.4	39.2	1.01	4.07	5.09	62.1	111	365	13	32.8	20.2
53.8	18.9	5	1.54	17.2	22.3	38.9	189	28.4	78.4	20
48.7	30	9.31	1.67	2.25	20.2	36.8	437	4.07	67.3	2.57
40.3	22.9	3.46	6.26	14.1	29.4	209	1554	27.9	53.8	23.9
82	42.2	4	5.33	9.06	7.99	18.4	385	14.7	13	7.17
35.9	14.7	9.39	11.8	45.7	22.5	36.5	221	2.62	23.9	68.5
38.5	20.2	16.4	8.43	22.3	27.6	49.6	250	20.5	49.1	17.3
53.8	27.4	3.05	1.68	24.8	23.3	44.9	359	26.4	60.4	42.2
56.2	19.8	9.91	4.87	6.73	26.7	41	221	28.4	40	9.73
51.9	12.5	4.29	1.18	7.84	13.9	28.4	284	22.1	55.7	15.4
57.3	23.7	9.56	1.83	9.47	17.6	49.6	717	22.1	40.3	12.1
110	65.5	8.35	1.01	20.4	18.1	33.1	396	35.9	66.1	19.3
61	41	3.96	3.92	19.8	27.6	44.5	355	28.9	69.2	34.9
70.4	24.6	1	4.53	42.9	79.1	155	2227	3.96	12	33.4
62.6	23.1	3.34	3.31	14.3	14.5	27.6	355	17.8	30.2	3.4
113	73	1	1.31	11.5	8.74	31.1	487	40	79.9	43.7
91.4	25	4.33	1.46	18.3	7.43	17.3	433	6.38	34.6	175
