# Supplementary material
Source: ML conference proceedings conference paper supplement (https://openreview.net/forum?id=nrbR2F29vU)
Supplement: supplementary_material [file 6. cd3cd28+u0126.xls]

## Sheet: Sheet1
praf	pmek	plcg	PIP2	PIP3	p44/42	pakts473	PKA	PKC	P38	pjnk
2436	3685	16.4	40	11.2	1	41.8	105	6.38	23.7	77.7
114	160	11.8	32.2	13.6	3.82	38.2	119	7.23	44.9	15.8
557	947	7.7	18.6	36.5	5.19	64.9	138	2.05	20	12.4
638	914	11.9	59.4	18.9	2.46	44.1	107	1.22	17.9	7.37
316	461	4.91	73.7	24.6	4.7	30.5	2017	25.9	49.6	15.8
181	279	4.61	281	50.9	5.23	50.9	215	1.72	28.1	13
213	328	26.9	160	59.9	1.12	68.5	95.6	7.43	27.4	5.83
139	189	2.5	457	32.2	1.6	105	403	1.7	32.2	9.91
173	274	8.58	50	30.8	1.25	23.1	48.3	24.1	76.4	22.3
322	500	15.5	23.5	9.06	1.83	38.2	36.8	1	23.7	9.65
1999	2738	12	19.6	18.4	1	61	88.2	8.51	26.7	143
389	588	11.1	82	13.6	29.4	119	4105	1	31.6	7.84
122	181	19.5	9.65	2.07	1.54	45.7	96.5	6.1	23.7	4.1
509	723	10.7	55.2	19.1	3.75	82.8	137	1	33.1	11.9
227	334	21.7	35.5	14.1	3.92	120	269	9.06	55.2	17
99.1	112	11.5	70.4	24.6	3.4	93.1	346	9.22	38.9	271
175	231	11.2	110	42.6	12.3	141	3820	1	34.3	3.79
1472	2129	11	5.47	20	1	23.3	78.4	1	10.8	6.21
204	355	20.2	32.5	23.3	1.32	23.3	103	14.9	47.8	22.3
1165	1685	12.6	16.5	3.02	3.13	84.3	349	1	29.4	15.5
161	269	14.3	21.9	17.9	31.3	202	4332	4.7	29.7	12.6
274	410	14.2	235	75	2.17	63.8	126	16.8	52.3	20.5
248	389	10.2	82.8	33.4	11.9	69.8	1827	1.15	45.7	15.1
372	588	16.5	379	64.4	2.41	110	331	1.81	21.3	15.3
1046	1568	13.5	18.4	5.83	1	32.2	95.6	15	53.3	22.7
286	375	17.8	33.4	10.1	7.7	59.4	355	11.9	44.9	13.9
157	274	1.86	18.6	23.7	1	170	379	1	12.6	9.06
461	723	12.3	15.1	12.6	12	37.5	737	10.6	47.4	12.3
281	414	22.5	31.1	21.7	6.32	77	271	4.07	27.9	1.67
621	1065	16.4	36.2	20.7	6.49	59.4	1894	20.9	58.8	28.9
269	426	17.5	23.9	2.27	1.41	11	10.8	2.37	37.9	5.57
305	445	10.3	20	8.58	1	19.3	106	1	26.7	5.78
106	142	11	60.4	19.5	1.09	133	362	3.89	37.9	5.94
49.6	49.6	13.8	63.8	19.5	27.9	100	1472	1.64	35.2	9.65
95.6	136	13.1	25.3	11.4	2.86	42.2	223	28.6	129	75
359	470	9.31	168	31.1	1	13.6	87.4	1	18.8	8.06
181	271	25.9	135	48.3	6.92	121	385	44.1	111	50.5
196	322	11.4	30.2	30.8	3.92	115	487	5.47	59.4	8.13
59.4	72.3	10.6	21.7	5.05	37.9	158	3051	3.49	37.2	9.65
114	145	7.77	131	30	1	32.5	107	11.9	33.7	17.3
151	237	14.1	27.4	17.3	2.39	42.2	204	1	36.5	18.3
433	667	7.1	10.6	32.8	2	83.5	334	4.41	14.1	7.57
813	1208	14.2	72.3	27.6	3.34	75.7	233	2.46	11.5	5.33
173	244	22.1	18.9	17.6	1	48.3	98.2	2.89	18.6	13
274	433	8.13	146	31.6	2.11	64.4	322	2.67	107	349
122	231	7.77	141	6.73	1	43.3	113	12.2	30	30.2
1155	1700	5.57	155	13.9	4.22	52.8	1655	2.37	16	5.42
154	165	9.65	183	36.2	3.4	111	316	49.1	90.6	42.2
239	349	10	17	30.8	2.59	32.8	102	1.17	12	1.36
355	453	10.3	19.8	15.3	2.13	155	319	1.65	21.7	3.65
509	799	14.9	13.8	9.47	26.7	133	4217	11.7	54.7	28.9
1208	1731	12.5	17.9	15.5	32.2	184	4826	2.55	33.4	11.5
673	1055	19.8	22.3	8.82	1.24	26.4	33.7	1.41	40.7	1
62.6	69.2	14.7	28.6	23.7	1.22	66.7	73	4.78	35.2	11.4
124	176	15	25.9	31.6	1	31.1	124	2.67	29.7	12.6
770	1084	13.8	19.1	8.28	27.4	145	6321	3.31	37.5	164
100	126	18.4	32.5	7.84	10.8	111	189	6.49	45.7	11
403	610	6.32	106	12.5	16.1	186	1094	3.02	30.2	15.8
257	410	6.98	21.5	48.3	1	38.5	54.7	20.2	52.3	27.1
1286	1827	10	50.9	42.2	3.62	59.9	183	33.7	96.5	48.3
141	229	5.67	13.5	40.3	1.03	233	441	1	19.6	8.06
55.7	112	14.6	20.4	7.77	1.88	16.7	10.9	3.72	10.6	3.96
175	217	9.14	73.7	28.1	1.5	31.9	62.6	4.18	47.4	19.5
1230	1700	12.9	142	43.7	2.84	33.7	79.1	10.3	38.5	25.7
246	352	10.6	17	18.4	1	27.4	48.7	11.2	46.6	147
12.7	17.9	13.1	56.2	14.1	1.14	32.8	45.7	3.16	33.1	11.5
313	445	15.7	16.3	1.01	1.18	29.4	36.8	1	13.2	6.04
67.3	106	14.5	22.9	15.4	20.5	71.7	882	5.19	16.4	7.37
496	770	12.6	14.3	9.22	2.37	27.6	45.3	11.8	34.9	19.3
368	588	19.8	130	51.4	17.2	67.9	2458	19.3	44.9	8.58
204	244	18.4	27.6	25.9	1	42.2	82	5.99	5.62	3.75
137	183	7.99	4.03	10.1	1.24	12.2	85.1	3.08	21.3	76.4
305	552	4	183	24.6	2.62	28.1	155	1.58	47.8	11.7
207	331	1.1	11.7	6.26	8.98	44.9	284	4.45	41	8.98
215	337	44.1	109	87.4	3.89	25.5	1778	1	11.7	1
334	449	11.9	87.4	21.5	4.78	82	1794	34	82.8	56.7
120	215	16	22.7	4.78	2.79	66.1	279	8.9	30	23.5
308	466	5.14	2.92	10.6	3	42.2	241	2.27	16.3	12.3
42.2	46.6	14.2	21.9	14.5	6.1	79.1	1176	20.4	59.4	32.5
39.6	59.4	9.65	21.1	10.6	1.91	14.1	55.7	1	11.5	7.57
209	271	23.5	31.6	10.6	7.3	101	217	14.7	27.1	4.7
281	400	9.73	23.1	30.5	25.5	153	2054	38.5	79.1	237
132	188	18.9	17.5	2.97	55.2	219	4255	10.8	38.5	106
433	638	7.99	130	26.7	1.96	74.3	215	4.07	23.3	12.2
183	225	38.9	100	69.8	1	56.2	109	1.57	28.1	6.44
308	514	13.7	59.9	6.85	4.74	67.9	292	9.91	101	172
127	195	14.2	17.8	21.1	1.67	23.7	74.3	16.7	61	11.2
1275	1827	8.74	16	5.52	4.87	39.6	100	23.1	56.2	15.8
186	235	34.3	120	48.3	2.05	89	184	31.9	119	49.6
105	155	17.2	19.3	6.85	1	31.9	137	1	12.9	8.9
325	491	35.5	69.8	13.5	1	43.3	106	13.1	42.2	94.7
69.8	109	11.9	49.6	11	2.07	113	264	11.5	37.5	10.6
1018	1446	4.07	122	13.3	3.08	14.6	64.4	3.89	27.6	13.9
76.4	57.3	20.9	109	112	28.6	137	2054	3.79	44.9	10.1
59.4	63.2	28.6	61.5	27.9	1.53	37.2	139	23.5	53.8	21.9
343	599	16.3	53.3	13.9	1.7	32.5	137	3.92	27.6	3.25
297	403	5.78	22.9	7.3	3.37	109	328	3.65	22.7	6.15
588	922	22.5	33.1	20.5	24.4	70.4	1286	7.37	51.4	98.2
791	1197	47	13	26.9	1.61	28.6	53.3	44.5	88.2	25
235	340	16.8	15.1	17.8	1.01	33.1	58.8	1.17	32.5	5.47
170	239	6.92	67.3	11	16	63.2	1486	57.3	139	33.7
644	1000	6.61	1.47	154	1.88	59.9	219	32.5	66.1	28.6
284	414	17	20.4	8.35	2.35	28.1	35.5	1	32.5	13.1
638	956	18.9	50.5	46.6	9.91	93.1	1382	1.35	33.1	16.1
235	334	10.4	61	11.3	1	70.4	241	1	9.56	12.1
225	340	13.8	56.7	36.8	2.13	58.3	255	2.04	29.4	1.95
382	562	131	93.9	770	1.12	31.1	102	1.61	18.1	3.16
2738	3924	14.9	11.1	6.04	2.57	78.4	221	1.65	18.1	3.4
898	1407	7.77	13.9	30.2	12.3	77.7	1794	13.8	45.3	17
193	264	20.5	19.5	17.9	18.9	61	1124	2.11	13.1	61.5
42.9	34.3	117	219	59.9	3.31	30.5	91.4	15.4	32.8	195
1472	2072	34.9	28.9	19.6	7.7	49.6	2308	10.7	40.3	68.5
97.3	126	53.8	188	106	1	46.1	121	2.11	27.9	124
85.8	123	16.4	103	12.3	1	63.8	241	1.01	19.8	3.4
92.2	91.4	45.7	79.9	37.2	1	139	188	12.9	49.6	8.51
1155	1747	15.5	154	27.4	2.33	75.7	248	4.07	29.7	8.9
172	279	5.99	28.1	47	6.21	72.3	325	3.72	32.8	8.58
143	229	14.5	25	20	2.29	30.2	61.5	3.55	16.7	10.5
204	308	26.2	23.1	5.52	5.42	58.3	176	12.4	80.6	158
167	289	17	33.1	13.2	4.57	141	325	12.2	32.2	112
615	982	28.9	44.5	31.3	9.56	191	1670	1.18	7.37	7.64
223	352	16.1	163	55.7	10.8	132	1568	9.31	34.9	13.9
72.3	106	15.7	25.3	13.6	1	49.6	89	12.2	42.2	13.2
300	449	22.7	25.9	5.73	11.3	67.9	1407	4.22	48.3	12
31.3	34.6	7.57	150	21.1	1.31	118	257	31.1	58.8	22.3
99.1	184	10.2	89	34	1.21	50	120	15.7	50.9	63.8
39.2	38.2	9.06	80.6	25	1.47	66.1	195	1.89	50.9	1
914	1370	4.18	15.5	63.8	1.88	49.1	143	2.11	29.4	4.07
109	176	15.8	973	98.2	3.28	57.3	279	37.9	67.3	4.61
86.6	81.3	89	246	111	1	33.7	80.6	11.4	35.2	71.7
35.9	35.2	23.1	95.6	32.5	3.11	75	289	3.43	25.3	8.9
487	685	13	18.4	4.7	5	121	392	17.8	41.8	17.2
478	723	18.4	21.3	1	12.4	91.4	2503	1.73	39.6	12.5
2714	3889	13.9	94.7	40	1.79	195	414	9.39	41.8	24.6
78.4	205	20	18.4	17	1.15	22.5	69.8	1.02	43.7	7.84
400	547	13.5	55.7	15.1	2.74	31.1	147	12.9	58.3	32.8
519	730	13.2	64.9	23.7	6.55	30.2	1700	24.6	48.3	13.5
225	305	33.7	58.3	30.8	7.3	56.7	1731	2.48	9.39	8.9
193	267	17.6	88.2	64.4	1	12.3	145	1.07	14.7	2.13
215	305	4.1	4.7	10.6	2.11	19.1	41.4	3.52	38.2	6.04
50	46.1	20.7	11.3	17.8	1	56.2	253	2.48	54.2	11.9
46.6	93.9	10.2	8.2	30.5	29.4	80.6	956	3.11	17.5	2.33
1420	1928	14.3	119	45.7	2.21	99.1	215	1	9.56	8.13
40.7	68.5	18.9	30	22.3	2.64	11.1	92.2	2.37	55.7	16.4
27.6	10.7	17	17.5	8.74	1	31.3	53.8	2.33	43.3	4.03
2035	2788	23.7	34.9	21.7	12.4	107	882	2.64	27.9	2
453	661	136	241	48.7	2.62	53.3	173	5.62	50	145
365	644	14.7	123	17.6	1.24	39.6	115	23.1	93.9	48.7
41.8	28.4	22.3	25.7	1.23	1.57	40.7	195	38.5	102	52.8
193	308	14.7	46.1	21.3	2.37	16.1	62.6	19.8	44.1	18.3
1065	1526	117	281	93.9	3.16	22.5	110	45.7	74.3	21.1
213	308	15.3	52.8	33.1	1	19.5	151	8.2	55.2	31.1
193	289	20.9	70.4	38.2	7.91	67.9	294	11.2	40	22.5
213	311	4.33	196	82	3.46	35.5	124	1.19	12.6	2.02
340	500	24.8	85.1	39.2	2.35	25	16	9.31	50.5	24.4
1134	1582	1	9.91	15.7	1.36	42.9	96.5	2.21	20	55.7
132	198	3.05	22.7	56.7	2.29	72.3	215	23.1	80.6	42.2
106	172	13.6	49.6	40.7	4.45	146	392	7.84	52.8	34.3
57.8	72.3	26.7	54.7	43.7	6.38	35.2	248	9.82	30.8	10.6
956	1382	16.7	20.9	13.8	11	49.6	1540	1.73	41	10.3
599	898	20.4	14.3	2.79	1.53	30.5	136	1.18	35.2	6.61
231	352	20	106	34	1.24	37.5	93.1	4.7	28.4	106
698	1104	21.9	21.5	5.05	3.02	138	359	46.1	93.1	29.7
1000	1512	16.8	106	24.1	6.85	63.2	271	4.1	23.3	17.6
188	292	11.4	93.1	14.1	1	38.5	129	1.04	17.6	8.06
56.2	56.7	11.9	120	31.3	1	57.3	163	3.4	13.9	12.9
164	213	15.8	552	66.1	1	25.7	90.6	5.33	77.7	175
1009	1420	21.1	26.7	53.3	6.49	67.3	346	1	31.6	1.79
461	784	20.2	24.1	7.43	1.1	20.2	87.4	1.64	19.1	2.53
297	437	7.7	18.4	17.6	23.7	77.7	973	1	44.9	12.7
164	269	59.9	67.3	23.1	1	118	223	1	8.74	1.51
649	1027	17	47.4	17.5	1	56.7	146	20.4	47	9.82
130	184	16.4	46.1	23.7	1.55	59.9	89.8	1	36.8	14.2
196	286	11.1	17	5	22.7	84.3	2308	2.79	10.1	7.37
231	325	13.8	51.9	22.3	2.74	51.9	129	3.11	23.5	6.61
23.9	32.5	15.4	4.03	23.3	5.14	49.6	1877	3.59	57.3	6.79
130	191	42.6	262	93.9	1	110	294	1.43	29.2	7.3
122	65.5	16.5	17.5	9.47	1.33	118	284	1.38	37.2	8.13
253	372	17.9	32.5	31.9	6.98	64.9	246	1.42	39.6	117
316	445	16.1	22.7	41	4.57	35.5	213	1.18	23.9	5.42
27.6	54.2	26.7	71	34.9	1.35	80.6	227	49.6	84.3	36.2
1124	1554	13	83.5	41.4	1	53.3	94.7	4.29	34.3	14.9
167	255	14.6	58.8	5.28	2.11	79.1	237	1	14.7	14.6
153	248	27.6	22.3	14.3	4.22	33.1	799	1	41	9.73
217	191	48.7	56.2	18.8	17.6	170	991	1	26.7	10.7
241	319	11.8	123	44.1	7.77	47.4	1334	3	52.3	20.9
433	588	15.5	14.5	13.2	4.33	17.6	71	2.86	22.3	3.46
1275	1811	15.1	19.1	14.2	16.5	121	1104	1.5	54.7	11
85.8	124	16.4	53.8	26.4	5.78	96.5	276	4.18	17.9	69.2
30	41.8	12.2	18.1	18.4	1	42.2	237	1.75	34.3	5
227	316	25.5	56.2	31.3	2.74	20.7	61.5	18.4	62.1	25.7
64.4	79.1	21.1	33.4	5.67	2.35	47.4	71	4.96	17.8	9.14
931	1310	12.5	23.7	1.3	5.09	44.5	85.1	1.64	14.3	10.4
466	777	16.5	18.8	10.6	1.08	64.4	163	16.4	51.9	30.2
1037	1420	20.7	12.5	19.1	1	67.9	143	2.55	11.2	7.64
85.8	107	14.5	35.2	8.74	1.36	17.6	50	3.59	38.9	2.55
470	704	17.2	21.7	5.62	1	38.2	54.7	3.05	24.8	17.9
673	939	24.1	24.8	2.07	7.57	112	1499	4.03	22.3	7.04
82.8	103	17.5	19.6	11	6.79	53.3	2148	28.4	66.7	103
84.3	142	9.65	142	8.35	1.45	126	352	3.65	29.2	111
300	445	18.4	16.7	12.6	25.9	158	1715	17.6	51.4	20.5
154	189	5.47	26.4	20.9	12.4	109	1433	2.15	53.8	11
843	1241	47.8	95.6	11.4	1.37	83.5	269	1.53	37.9	7.04
308	547	15.7	56.7	30	2.09	30.5	167	1	13.1	1.88
145	164	15.7	193	11.1	4.1	91.4	389	11.8	34.9	13
181	271	3.96	17	25.9	1.72	110	262	1	26.9	5.05
1794	2393	17.3	51.4	31.6	1.09	26.2	124	6.85	35.9	3.62
66.7	88.2	17.6	27.1	19.3	1.14	17.5	81.3	3.37	21.3	9.91
241	375	18.9	17.5	6.38	1.04	109	217	11.9	31.9	8.74
1252	1762	13.8	66.1	15.5	3.89	165	573	2.67	36.8	6.15
131	213	26.7	487	86.6	3.25	48.7	147	14.2	57.8	82
52.8	73	11.2	89.8	15.4	1	20.7	77.7	1.5	6.38	7.5
1526	2227	30	52.8	70.4	18.6	46.1	1176	21.7	72.3	42.2
914	1298	11.1	46.6	10.9	4.14	38.9	149	1.76	30.8	6.21
62.1	71.7	12.9	85.1	26.4	1.84	43.3	61	1.61	29.7	13.7
274	426	9.31	19.3	11.2	1	17.2	44.9	4	26.9	16.4
38.9	36.5	20.9	37.2	14.7	3.08	76.4	259	7.57	53.8	9.73
58.3	87.4	15.7	96.5	19.6	22.3	145	956	1.64	26.7	16
160	257	15.5	64.4	30	6.85	46.6	2350	1.54	34.9	12.2
227	289	8.2	173	25.3	8.13	155	449	1.27	44.9	17.6
63.2	89	20.4	23.5	73	1.43	40.3	167	1	21.3	6.49
157	231	18.8	15.7	15	25.5	97.3	757	3.05	10	7.84
32.5	77	10.7	25	19.8	1	23.5	93.9	1	28.4	6.32
209	334	21.5	11.9	7.3	1.54	51.9	164	30.8	115	56.7
547	906	26.9	319	50.9	1.24	124	340	9.91	34	20.2
158	204	7.99	23.9	13.2	1.78	41.8	173	3.02	24.4	5.52
231	269	24.8	22.7	41.4	1.45	11.8	78.4	8.2	32.8	9.14
138	193	17.2	68.5	29.2	26.2	227	2148	3	17.2	5.23
1252	1778	38.9	52.3	21.1	4	24.8	137	2.39	34.6	10.3
931	1395	42.2	133	313	1.18	122	183	1.04	32.5	3.16
130	198	16.5	10.8	22.9	2.74	30.8	91.4	10.8	32.5	5.83
103	176	29.4	66.7	78.4	1.67	20.5	66.7	1.5	48.7	5
78.4	94.7	9.22	25	42.6	4.29	64.4	209	1	19.6	5.42
231	322	14.1	21.7	14.2	1	66.7	62.6	15.1	59.9	14.5
632	843	25	88.2	59.9	12	55.2	1747	1	61.5	13.6
211	286	19.3	27.4	2.62	1	33.7	146	1.51	48.3	12.5
1230	1843	12.2	15	15.8	1	23.7	126	1.81	21.5	6.21
89	146	12	30.5	6.79	1	58.3	223	4.74	15.3	7.7
195	269	24.4	130	48.7	1	65.5	146	29.4	93.9	37.9
55.2	32.2	1.96	300	30.8	5.14	91.4	791	10.6	31.9	18.3
1144	1611	10.5	145	12.7	20.2	61.5	1230	3.59	31.1	8.51
186	302	1	271	16.3	6.98	44.5	449	1.57	17.6	6.1
1055	1625	10.3	35.5	64.9	4.61	29.4	29.2	1.2	32.5	4.61
483	737	13.7	55.2	21.9	2.57	91.4	292	1	30.8	15.1
52.8	86.6	7.3	27.6	42.9	2.84	46.1	104	1.14	20.7	4.14
95.6	137	21.9	37.5	13.1	1.54	41.4	123	1.2	16	8.98
211	322	42.6	45.3	13.6	10.6	85.1	407	1	44.9	6.49
302	437	12.7	39.2	17.9	1	53.3	168	3.62	50.9	79.9
1275	1843	19.5	153	23.3	1	79.1	271	1	25.7	5.47
533	813	5.94	12.4	20.5	1	32.2	65.5	1.5	20.4	2.33
939	1433	32.5	25.5	37.2	2.94	28.6	98.2	1.58	22.3	76.4
67.9	93.9	29.7	16.4	2.89	2.76	55.2	158	4.96	51.4	8.58
178	284	19.6	48.3	18.1	3.79	44.5	1298	39.6	62.6	28.9
1499	2091	26.2	52.8	106	3.43	133	331	3.85	30.5	16.3
225	346	23.5	53.8	84.3	19.5	85.8	1459	2.39	25	6.73
308	453	20.4	15.5	1	4.83	82.8	365	3.65	15.4	17.2
175	264	12.6	17.2	18.4	2.21	39.6	866	1	31.3	1
198	264	3.4	40.3	5.83	1.2	40.3	141	3.62	37.9	13.7
80.6	105	25.9	15.7	25.3	4.57	117	233	16.5	41	18.3
65.5	73	23.3	32.2	16	2.86	62.6	117	1	26.2	7.99
44.9	74.3	24.4	12.3	29.4	3.82	178	352	3.96	13.6	7.99
204	379	21.3	47.8	88.2	22.1	120	1540	10.7	37.5	18.3
223	365	10.8	31.6	35.2	1.73	37.2	143	4.18	15.8	1.88
87.4	167	25.5	379	66.7	1	45.7	57.8	33.1	57.8	43.3
478	770	15.4	85.8	22.1	1.47	84.3	328	1.08	22.1	4.96
58.8	125	7.57	196	27.4	2.81	17.2	98.2	4.26	20.5	14.9
147	176	11.2	34.9	36.8	6.21	54.2	1459	16.3	55.7	32.2
55.2	58.3	18.3	20.9	8.98	2.71	28.4	108	2.37	29.7	1.58
231	343	16.3	59.4	20.5	2.97	30	124	2.67	22.9	3.82
322	478	13.6	15.7	4.57	1	25.9	66.1	1	28.6	10
241	328	13.2	94.7	25.7	2.55	23.9	153	2.67	9.91	3.65
178	257	5.78	12.9	30.5	14.2	80.6	1911	5.99	42.2	10.6
385	578	8.13	155	45.7	3.79	133	414	3.59	24.4	4.22
300	426	21.1	20.5	12.1	3.72	61	274	1.3	24.1	7.64
127	172	17.9	56.7	20.9	7.7	36.8	1018	1	26.4	10.2
139	227	10.2	24.1	22.9	2.09	121	337	2.25	31.1	5.09
244	322	14.7	12	3.82	1.76	54.7	118	4.49	58.8	30.2
1219	1794	2.53	382	32.8	2.89	45.3	145	2.07	32.8	8.98
193	311	10.3	28.9	77	42.6	337	2864	1.13	31.3	5.94
562	906	15.5	18.3	12.1	1.19	35.2	85.1	7.1	38.5	17
56.7	47.4	13.6	141	46.6	1.76	44.5	161	1.89	34.3	12.4
157	223	22.7	217	71.7	1.58	59.4	114	1.22	19.3	10.5
418	578	16.7	32.5	5.57	12.1	173	1670	9.14	64.4	7.1
17.3	28.6	11.4	55.7	20.9	1.73	48.7	262	3.08	20	4.53
1433	1999	25.9	23.1	13	4.91	77	1540	1	22.7	8.28
101	167	46.1	313	66.1	68.5	599	5989	6.79	25	5.47
253	346	13	117	36.5	13.7	53.3	300	34.3	76.4	26.7
437	632	32.2	53.3	15.3	2.5	32.8	262	10	31.3	12.6
56.7	45.7	14.9	123	52.3	2.5	47.8	170	2.19	21.5	5.78
519	764	13.8	53.3	28.9	1.11	48.3	84.3	12.6	55.7	31.3
137	253	4.41	13.7	13.7	6.98	4.91	325	2.69	11.3	14.9
292	422	13.3	25.3	5.33	1	176	300	3.59	29.4	85.1
63.8	71	12.7	15.7	1	1	44.1	50.9	4.07	40.3	121
359	542	26.2	48.3	8.06	4.14	51.4	1540	1.19	31.6	7.43
2227	3220	16.5	17.2	12.2	1.01	40.7	92.2	2.97	55.2	7.17
737	1084	17.9	42.2	15.1	1.36	56.7	172	1.91	22.9	96.5
227	334	23.9	63.8	17.3	14.7	64.9	1554	4.14	37.2	123
164	244	13.9	14.6	1	1.83	71.7	150	2.76	26.9	5.14
231	346	17	45.7	15.5	1.63	32.5	118	17	82.8	23.7
40	51.9	17.6	164	56.7	1.43	56.2	122	3.46	28.4	4.66
198	294	22.5	8.98	10.2	2.27	99.1	956	2.5	25.5	12.3
141	221	13.5	64.9	31.9	2.89	80.6	193	1.45	25	10.8
1310	1827	18.6	102	23.3	2.09	34	137	2.17	21.9	9.06
168	269	10.6	161	19.3	1.98	49.1	178	1.25	12.1	5.42
49.6	46.1	11.4	15	5	18.1	175	1197	1	20.4	10
231	319	11.5	147	26.7	35.2	147	2916	2.15	36.8	8.13
179	255	18.9	20.4	9.39	1.29	43.7	44.5	5.67	42.6	102
106	136	15.7	12.1	24.1	2.94	178	487	3.49	32.8	86.6
557	843	13.6	87.4	35.5	1	64.9	82	1	9.47	4.78
94.7	137	23.3	9.22	40	4	22.1	410	1.07	50.9	17.8
2187	3051	41.8	47.8	19.5	1.63	17	69.2	1	18.1	3.89
328	403	8.13	20.9	17.5	1	18.1	82	1.08	21.5	13
340	610	14.3	37.5	11.9	8.66	124	1407	1	17.6	4.07
101	300	22.7	13	10.9	1.43	15.4	62.6	2.92	19.1	16.4
160	229	15.8	48.7	4.83	1	55.7	179	21.7	52.8	20.5
403	621	12	15.8	2.09	24.6	514	2035	2.41	28.9	2.86
289	241	7.17	149	7.04	2.86	46.1	221	4.14	25.5	110
509	799	28.1	31.3	20.9	25.5	139	2393	1.01	21.7	8.43
661	991	54.2	101	20	3.11	34.3	183	3.68	23.1	8.74
578	939	15.8	40.7	8.98	10.3	125	1568	1.21	33.7	11
59.9	66.1	40.7	170	41.8	1	34.6	154	4.1	38.2	12.3
253	359	15.5	20.7	34.3	4.03	93.1	267	1	33.4	7.37
244	362	15.8	27.6	4.96	80.6	229	2738	23.1	46.6	27.1
533	843	10.2	147	31.9	4.29	84.3	198	2.5	20.5	5.42
204	308	22.7	33.7	14.1	26.7	96.5	882	7.5	31.1	11.1
246	422	16.1	14.1	2.04	4.96	49.1	202	1.78	48.7	5.99
1685	2393	17.2	110	34	1.75	55.7	137	2.09	40	8.66
1499	2227	13.5	127	19.5	1.1	11.8	71.7	2.48	20.5	1.49
64.9	99.1	34.9	43.3	69.8	5.67	138	410	4.61	12.7	1.64
262	400	14.2	122	1.63	1.31	78.4	191	1	20.9	9.82
86.6	74.3	8.43	136	16.3	24.1	72.3	1027	1	26.2	5.28
679	982	9.39	131	8.28	9.56	73	255	3.43	36.2	2.53
1446	2091	26.7	37.2	9.47	2.33	79.1	211	14.3	42.9	30
573	882	12.4	11.5	4	9.22	65.5	289	1.27	14.9	7.43
874	1298	15	10.4	16.5	1.15	15.4	86.6	2.44	40	13.5
750	1144	12.6	14.5	11.4	12.4	47.4	939	11	20.7	8.66
60.4	97.3	9.31	2.46	16.3	1.47	24.1	79.9	1	17.6	8.35
328	466	14.7	39.6	49.6	6.61	60.4	165	2.31	48.3	15.5
42.9	39.2	14.6	20.4	16.1	1	24.4	47	1	22.3	7.5
474	799	16.4	20	25.5	13.2	56.2	1358	1.61	37.9	8.06
196	267	42.9	65.5	104	11.2	59.9	422	1.79	36.8	14.7
120	153	10.9	13.8	10.6	1	48.3	67.3	1.46	61.5	19.1
227	340	10.2	22.1	3.65	1	33.1	31.9	1.96	24.6	6.1
340	496	22.7	25.9	75.7	1.46	36.5	213	2.07	19.6	1.67
365	542	3.59	21.3	34.3	10.8	126	445	1.23	21.9	8.82
410	562	17.3	21.5	12.9	1	69.2	149	1.55	22.7	10.5
55.2	85.1	6.04	20.2	5	1.96	67.9	126	4.66	22.5	8.2
147	235	6.61	22.3	47	2.07	47.4	151	1.2	12.6	4.74
155	227	34	49.6	7.3	2.74	36.2	147	2.48	24.6	2.64
284	400	19.5	31.9	3.59	1.07	62.1	191	1	12.1	15.7
2288	3429	35.2	42.6	18.9	1.43	30.5	1094	2.31	30	6.73
355	523	14.1	25.9	16.5	2.09	93.9	294	5.67	30.2	6.15
107	90.6	9.56	64.4	30.5	1	58.8	173	2.39	14.6	4.83
139	165	14.6	21.7	11	1.37	67.9	137	1	14.1	2.05
131	184	10.6	10.8	1.63	2.79	34	111	2.33	17	2.46
81.3	139	21.3	20.9	8.35	1	12.6	50	1.12	45.3	12.9
231	337	50	65.5	36.5	1	63.8	65.5	4.53	12.3	4.96
49.6	54.7	27.1	337	38.2	4.91	47.8	1027	2.02	12.2	8.2
523	828	13.2	73.7	15.4	1	119	279	1.2	37.9	6.73
168	244	20	17.8	21.7	1.64	103	248	1	27.6	8.82
799	1186	19.3	15.8	17.3	1	22.5	46.6	1	16.7	2.53
349	441	50	328	79.1	2.02	28.1	58.3	1	15.5	4.07
97.3	95.6	3.65	2.84	1165	7.5	160	429	2.86	43.7	7.5
217	403	21.3	15	21.9	9.56	55.2	1459	4.57	40	13.8
655	947	16.5	23.9	24.4	1	48.3	164	2.27	10.6	2.44
71.7	115	25	36.8	10.5	3.08	71.7	259	1	15.5	7.7
213	311	7.99	39.6	49.6	3.79	205	466	1.47	22.7	1
250	372	19.8	248	79.9	4.78	151	328	2.71	9.56	10
874	1334	26.2	30.8	7.23	1	28.4	46.1	1.49	17.6	7.1
334	519	8.82	20	37.5	5.28	143	396	3.11	16.1	3.68
186	235	25.5	61	22.9	8.82	126	1526	12.6	47	24.4
88.2	91.4	14.1	13.3	8.9	8.98	97.3	1018	1	18.4	1.83
757	1124	17.9	13.5	4.7	4.29	29.2	132	5.42	44.9	13.3
160	255	36.8	83.5	24.8	4.1	30.8	191	2.21	27.4	7.77
449	679	13.7	13.6	7.99	9.14	85.1	2091	2.57	53.8	6.55
40.7	33.4	11.9	13.8	26.9	1.1	87.4	196	4.1	24.6	4.26
25.7	113	9.82	20.2	33.7	4.1	113	385	18.3	56.7	67.3
246	340	18.9	24.6	10.8	3.82	33.1	105	35.9	89.8	41
42.2	73	19.3	56.2	50.5	5.62	67.9	1778	1	20.9	4.33
105	139	30.2	38.2	16.8	2.67	84.3	262	1	13.6	2.76
552	866	23.1	41.4	13.5	1	47	94.7	2.33	49.1	12
965	1459	11.9	23.7	18.8	26.9	93.9	1275	2.19	35.9	7.37
365	552	21.7	41.8	30.2	2.67	10.2	100	1.32	33.4	10.3
223	313	15.4	77	29.4	3.65	70.4	1762	1.54	17.5	5.38
63.2	110	40.7	343	78.4	1	85.1	255	3.4	37.5	36.2
1165	1731	30.8	42.2	22.7	4.57	34.3	209	3.4	20.7	3.68
131	175	11.2	17.6	7.23	1	32.8	39.2	1.45	32.8	15
244	343	63.2	160	37.5	1.17	75	189	1	15.5	7.3
12.6	25.9	13.7	46.1	30.5	4.53	120	359	15.5	62.6	26.7
655	1027	33.1	30.5	14.2	18.3	54.7	1499	3.02	10.7	1.32
253	340	40	441	106	1	147	349	2.05	24.4	4.96
71.7	114	1.65	2.94	22.1	3.68	79.1	178	2.02	7.1	5
1186	1762	35.5	42.9	48.3	2.39	73	253	1	31.9	12.6
114	196	10.7	22.3	37.2	7.5	35.9	267	2.71	60.4	23.7
528	784	10.5	26.4	21.5	1	28.4	82	18.4	38.5	10.5
302	445	7.64	6.26	4.45	10	52.8	1358	1.29	33.4	8.2
51.9	63.2	18.6	41	28.1	24.8	63.8	914	8.66	34	12.6
437	621	39.2	61	7.91	1	52.8	51.9	1.98	13.9	6.26
44.9	58.8	17	115	40.3	2.94	120	302	10.3	38.9	7.17
79.9	71.7	15.8	61	27.4	1.75	21.3	110	2.31	16.7	2.11
93.9	145	11.8	410	62.6	4.96	91.4	223	33.1	79.9	20.9
308	453	28.1	146	42.2	3.05	61	154	1.22	21.3	4.18
227	449	24.1	94.7	35.9	21.1	67.9	2788	2.5	37.2	4.78
126	154	33.4	42.2	9.82	23.9	122	1446	2.71	13.5	5.47
71.7	94.7	14.7	53.8	13.1	2.81	97.3	316	2.13	23.5	9.31
39.6	55.7	9.56	248	28.1	12.1	133	1358	1.7	53.3	12.6
743	1134	14.5	267	76.4	1.04	24.1	107	7.84	49.1	113
104	139	12.3	40.3	15.5	1	17.8	107	1	49.1	6.61
956	1420	10.6	20.5	12.1	3.46	43.7	202	1.42	61.5	16.5
229	294	10.8	35.5	29.7	6.85	24.6	67.3	1.3	29.7	7.77
453	573	12.3	129	44.1	7.99	143	441	5.73	46.1	14.5
355	505	8.98	164	18.9	1.83	175	519	1.45	12.1	11.7
547	820	13.3	24.1	18.6	4.22	46.1	189	15.4	44.9	23.9
153	231	13.7	20.7	31.6	2.25	76.4	274	1.13	19.5	3.4
178	289	8.13	231	31.6	20	64.4	965	1.03	23.7	6.49
179	204	10.3	135	15.1	51.9	276	2996	14.5	41	8.2
445	667	20.9	23.3	23.9	2.31	26.4	53.3	2.46	12.4	6.55
922	1382	13.3	17.3	8.43	3.34	50.5	160	1	59.9	5.42
13.9	18.3	16.4	20.9	6.98	1.03	23.5	48.3	1.64	25.9	3.65
302	445	18.6	30	67.9	4.1	41	186	1.07	38.9	12.2
1075	1540	13.6	110	21.9	12	119	4573	1	7.17	1.14
193	136	9.91	198	35.2	3.59	47	204	2.59	33.7	5.62
167	211	10.8	104	31.6	37.9	122	3555	2.84	36.5	6.32
276	433	11.5	16.8	8.58	1.35	26.9	124	1	28.9	120
262	365	12.2	30	37.2	87.4	223	3429	1	17	6.79
274	375	1.26	322	40	1	23.9	85.8	2.81	10	4.14
359	542	23.1	81.3	25.3	1	45.3	131	5.19	56.2	90.6
382	588	22.1	27.6	5.73	10.6	119	1611	1	32.8	4.29
1310	1963	14.5	103	41	9.22	44.5	973	6.61	17.8	51.9
77	94.7	11	16.7	32.8	1	39.6	60.4	1.08	30.8	8.13
189	284	16.8	58.8	25.9	18.4	69.2	1144	1	19.6	7.37
615	965	20.9	11.4	10	1	30.2	29.7	1.65	31.1	1
418	638	40	49.1	50.9	5.05	161	523	1	11	1.1
225	340	10.5	19.8	61.5	1	85.8	137	1.17	26.9	6.79
181	271	13.8	9.56	20.2	16	204	4491	2.5	31.3	67.9
63.2	79.9	22.7	83.5	42.6	9.65	93.1	1747	1.3	31.1	7.43
389	426	36.8	119	23.1	1	36.8	87.4	12	43.7	20.9
457	685	6.55	34.9	25.7	1.23	108	223	1	25.5	81.3
39.2	43.3	72.3	147	21.3	24.6	112	542	2.55	9.73	9.82
209	311	6.79	49.6	19.3	16.5	178	191	3.75	31.1	21.7
667	1000	14.2	16	10.6	2.81	22.5	54.7	1	27.1	12.9
32.5	43.7	11.3	121	17.8	24.1	138	3960	2.41	16.7	6.21
70.4	108	20.2	19.5	20.5	16.3	54.7	947	1	15.7	3.31
183	271	6.15	215	19.1	1	22.1	3.65	26.7	69.8	92.2
487	723	10.7	40.3	30.5	1	89	163	1.07	36.2	10.5
1582	2308	45.7	48.7	11.8	2.37	77.7	259	7.37	40.7	5.05
49.1	103	21.3	15.4	5.28	26.9	75.7	1065	4.33	44.9	7.99
292	407	19.1	47.4	13.9	7.43	42.2	300	5	28.4	9.91
308	461	17.5	11.4	10.2	5.73	131	3398	1	13.6	7.91
111	168	14.7	7.99	7.77	1	20.4	45.3	1	10.2	5.19
337	552	19.8	36.5	25	1	111	223	1.98	12.9	4.66
117	142	18.1	14.7	9.82	5.62	89	221	2.76	15.1	3.52
375	547	13.8	87.4	14.9	1	153	237	2	25.9	3.92
365	673	63.8	139	23.5	2.69	59.9	184	1	46.1	7.3
183	267	13.3	16.7	2.41	1.15	28.9	88.2	1	18.9	1.14
85.1	130	13.6	12.9	12.6	2.74	21.9	179	1.25	22.1	8.82
93.1	138	9.31	362	89.8	4.57	62.6	191	2.89	34	9.39
193	279	27.9	40.7	10.4	2	69.2	165	5.47	16.3	8.13
22.9	35.5	16.5	21.1	23.3	1	67.9	189	2.31	35.5	12
392	557	16.4	196	14.5	1.61	61.5	172	5.05	50	7.23
965	1472	2.17	16	46.1	1.17	39.6	130	1	16.5	3.89
717	1114	51.4	61.5	15.1	2.05	88.2	257	1.23	33.7	1.84
193	279	20.4	20.7	6.79	9.39	48.7	982	1	17.9	9.73
382	496	16	50	25.3	4.29	80.6	233	1	10.5	2.15
246	343	10.8	117	40.7	3.72	96.5	233	1.57	12.4	9.65
418	626	9.22	71	28.1	1.88	108	276	1	8.9	13.9
227	322	20.4	11.5	10.9	3.22	49.1	131	1	15.7	9.22
137	233	30	83.5	70.4	3.92	48.7	157	2.27	28.4	3.79
542	777	15.7	25.9	17.9	1.46	52.3	138	1	31.6	14.6
168	257	22.1	90.6	37.5	1	56.7	75	1.98	28.4	1.06
262	368	4.33	17.8	62.1	1	34.6	142	1	17.9	3.08
237	382	19.8	16.1	16.7	24.8	79.1	874	35.2	153	57.3
292	478	45.3	81.3	20.9	2.97	32.2	55.2	23.3	69.2	27.6
505	704	1.47	262	36.8	5	85.8	407	1	19.5	59.9
223	368	6.79	33.7	22.5	4.87	34	137	1.06	10.6	10.6
170	253	15.4	15.8	9.39	10.1	57.8	1778	1.39	31.6	13.2
292	400	19.8	57.3	44.1	23.5	172	1027	1	18.6	1.96
47.4	42.9	21.7	28.4	19.5	4.37	34	65.5	3.55	34.6	4.45
99.1	158	20	18.3	3.55	39.6	133	4614	1	13.2	1
176	191	20.5	23.7	5.73	1.35	23.9	42.6	1.12	10.3	1
898	1298	41.8	38.2	10	2.17	59.4	135	4.83	47.4	7.77
217	305	11.8	45.3	65.5	9.22	130	449	6.79	47.4	7.7
403	621	16.4	115	21.7	13.5	70.4	1512	3.92	9.56	9.14
157	196	35.5	127	52.8	25	167	973	13.6	53.8	22.3
461	750	13.7	62.6	13.8	1	54.2	123	1.6	16.3	3.37
813	1155	11.1	75.7	43.3	1	83.5	255	1.08	20.7	4.83
365	533	2.23	6.04	26.9	1	23.5	82	6.61	43.7	9.47
221	328	30.2	46.6	16.3	2.81	28.6	69.2	1	25.7	8.74
115	173	35.9	509	62.1	1.63	18.6	73.7	2.25	41.8	8.58
1395	2110	23.3	33.4	5.57	2.48	19.8	103	6.92	48.3	25.7
74.3	141	81.3	179	34.3	1	40.3	136	2.31	37.5	7.37
542	813	14.6	18.1	18.3	4.45	127	1843	3.92	15.7	4.61
365	533	16.1	50.5	23.7	3.89	70.4	186	1	10	3.08
153	235	37.9	146	43.3	4.1	198	533	1.51	17	2.84
1395	2017	2.02	75	13.5	1	32.2	66.1	29.4	82.8	62.6
1554	2371	12.6	183	20.2	2.55	82.8	233	1	26.4	7.17
150	239	9.47	89.8	20.2	36.2	147	2690	1.78	27.4	12.9
71	80.6	5.73	1.54	24.6	1	153	418	1	13.5	5.94
599	828	3.72	25.7	16.8	16.3	196	143	3.34	24.1	13.3
172	204	17.6	16	13.9	1	31.9	53.3	1	19.6	7.43
72.3	94.7	14.2	83.5	31.6	11	122	337	17.8	65.5	27.6
244	352	8.43	108	25	2.02	59.4	213	1.86	21.1	2.84
392	528	15	16.3	1.26	2.15	41.4	78.4	1	16	3.22
202	271	10.2	31.9	41.4	1.88	73.7	292	2.55	25	6.85
274	422	33.1	235	54.7	1	44.9	110	3.65	36.8	5.52
158	259	9.47	32.2	19.5	3.62	52.3	1075	1	69.8	5.38
632	1000	14.6	41.8	13.8	6.92	132	1176	4.03	17	11.3
231	352	14.1	21.7	7.64	1	115	229	2.13	19.5	15.8
1104	1554	14.9	119	21.5	2.33	119	403	1	41.8	5
253	410	59.9	101	23.3	1	22.9	99.1	3.31	52.3	11.1
281	426	14.5	54.7	16.1	17	59.4	858	1.96	26.9	6.49
248	375	11.2	28.1	78.4	1.29	98.2	253	1	8.13	2.76
59.4	99.1	20.7	41	12.4	17.9	93.9	573	1.98	53.8	10.5
4.45	11.7	7.84	13.2	33.7	1.11	32.2	12.7	1.55	61	14.3
29.2	22.1	3.34	1.76	18.3	20.5	58.8	898	1	27.9	8.28
437	588	11	49.1	27.1	3.34	26.9	108	13.8	61	13.5
188	235	13.8	19.1	13.8	2.84	79.1	337	3.68	16.1	7.77
365	528	10.4	26.7	24.1	4.57	41	1700	1	28.6	7.43
121	150	17.3	154	58.3	2.86	32.8	165	1	38.9	16
300	400	29.2	389	173	1	64.9	248	2.23	21.5	7.64
207	294	15.4	21.3	5.88	5.28	186	474	1.42	26.2	4.87
246	349	8.74	66.7	14.9	4.26	25.5	198	4.14	14.9	50
496	770	20.2	26.9	9.14	13	117	2525	1	28.9	2.92
1472	2110	15.3	2.37	9.56	1.61	18.3	60.4	1.73	42.9	69.2
47.4	59.9	38.9	375	57.8	2.48	67.3	178	3.89	26.7	10.9
757	1144	2.62	542	55.7	3.19	54.2	137	1	31.1	3.62
189	297	2.17	11.8	14.9	4.7	71.7	1446	1.86	48.3	12.3
621	965	28.1	91.4	36.8	3.96	19.5	89	2.21	16	3.85
135	241	11.4	48.7	14.5	6.67	205	704	1.03	11.4	1
355	519	4.91	157	20.2	1	14.3	123	1.89	23.3	2.71
255	403	46.1	52.3	5.19	1	107	229	1.81	30	4.87
63.2	62.1	17.5	12.7	8.43	2.53	9.82	62.6	3.55	12.4	7.3
141	193	45.7	54.7	21.9	17.8	137	2436	1	23.7	4.66
626	1027	11.1	27.4	5.28	1.64	50	69.2	1.12	10.2	8.98
939	1382	10.9	15.8	13.6	6.67	57.8	308	2.71	18.3	6.49
1018	1420	11.8	23.5	5.05	5	179	542	1.05	22.5	13
24.4	18.4	3.68	1.67	12.2	8.13	32.5	179	2.09	18.8	3.43
382	615	20.9	16.8	1	1.33	20	61.5	1.45	13	4.57
302	461	8.06	14.5	1	1	41.8	124	1.73	9.82	2.44
32.5	40.3	8.13	161	52.8	1.37	71	235	2.97	17.9	4.45
110	157	22.3	151	56.7	34.6	167	1055	1.45	17.2	7.77
965	1370	14.2	15.8	16.7	13	78.4	302	1	22.5	9.22
410	583	12.9	13.8	1	1.72	13.1	55.7	1.78	25.5	1
1963	2714	13.5	25	10.5	2.59	44.9	188	34.6	71.7	20
1433	2072	14.6	29.4	13.8	2.71	44.1	102	4.53	34	8.51
215	362	7.3	18.1	35.2	3.02	25.9	172	1.35	20.9	5.67
297	505	19.6	52.3	32.2	44.5	109	1370	2.92	24.4	8.58
225	368	4	20.5	8.51	2.23	65.5	255	8.66	34.9	5.67
43.7	55.7	18.3	96.5	27.6	1	42.6	69.2	14.3	42.9	23.5
193	262	60.4	120	38.2	28.6	143	5989	13.5	42.6	17.2
2329	3278	11.2	44.5	17.3	1	30.8	37.5	1	21.9	15
538	874	11	39.6	17.6	2.86	129	248	2.57	46.1	14.5
225	294	13.2	23.5	6.79	4.07	155	519	2.11	16.3	1.01
25.9	64.9	43.3	55.7	7.57	22.9	66.1	931	14.2	40.7	19.1
396	710	26.9	215	51.9	6.32	41	1446	33.7	110	56.2
170	248	12.6	24.6	33.7	5.83	43.7	1104	1	22.9	1.39
132	189	22.1	85.8	19.1	1.68	43.7	178	1.72	36.8	3.72
1685	2480	16	15.7	4.87	8.98	46.6	1395	1	22.7	1.6
142	205	1.27	13.1	32.8	1.29	70.4	127	1.41	31.6	12.3
241	362	17.8	30	15.3	1	18.9	50.5	3.22	17.6	9.47
523	813	16.3	30.8	18.9	3.19	22.9	64.4	1.11	19.3	3.75
74.3	120	19.1	115	15	1.18	42.2	118	1	22.9	11.3
284	426	17.8	16.4	11.7	1	47.4	66.1	11.1	74.3	20
59.4	59.9	7.5	160	10.8	2.59	37.5	1310	2.62	12.6	3.85
262	368	55.7	137	18.1	1	83.5	193	2.97	20.5	7.57
422	655	2.35	466	42.9	23.9	92.2	2813	1.65	31.6	6.79
86.6	146	43.7	38.9	3.92	1	77	109	1	13.5	2.69
248	389	7.17	20	23.9	3.92	63.8	328	6.98	48.3	37.5
223	302	27.1	170	37.5	2.5	63.2	130	1	28.9	7.04
106	113	12.3	71	40	1	25.5	46.1	1	15.1	5.42
125	184	2.33	5.14	5.57	3.34	47.4	146	1	26.7	5.88
181	213	11.9	53.3	10.6	1.23	145	325	1.7	19.8	8.28
567	806	18.8	41	18.6	1.13	31.6	115	4.49	22.3	12.3
2436	3398	11.8	13	5.23	1	26.9	126	3.72	15.8	10.1
340	491	11.9	22.1	9.06	9.73	70.4	2054	1	16.4	4.96
453	685	9.91	15	10.8	9.82	109	322	1.55	10.6	7.99
131	200	14.6	16.1	12.3	12	191	1731	2.48	20.7	9.82
109	155	9.73	94.7	21.5	6.49	38.9	141	1	44.9	4.45
5.78	17.6	8.66	50.9	40	1.61	50.5	158	1.35	17.8	10.6
1794	2690	24.6	24.4	14.1	1	50.9	52.8	3.79	18.9	13.1
305	478	25.9	34	4.41	1.43	35.2	54.7	1	34.9	10.6
661	947	57.8	58.8	6.98	12.9	58.3	1433	2.84	9.73	2.64
1981	2763	79.9	594	141	1.5	39.2	217	5.88	16.8	7.7
59.9	98.2	6.38	47.4	20.7	4.57	41	1176	1.05	32.2	8.51
835	1208	12	20.7	6.44	5.14	204	594	1.83	25.7	7.5
698	1144	2.25	13.8	10.5	1	40.7	118	20.5	73	42.9
170	207	3.19	13.2	28.4	2.29	100	276	3.68	32.2	8.2
74.3	89	30.8	50.5	61	3.49	95.6	300	14.3	39.2	18.8
253	355	7.3	20.4	15.7	1	15	28.4	6.98	48.3	259
196	281	13.9	39.6	17	1	27.1	87.4	1	26.2	9.47
63.2	86.6	14.2	13.6	7.43	1.11	22.7	67.3	5.28	31.3	15.7
441	673	13.2	14.9	13.8	23.9	53.3	991	9.56	32.8	145
42.2	45.3	16.3	98.2	36.8	21.5	114	2864	1	18.9	7.64
279	349	8.51	30.5	10.3	31.1	90.6	2329	5.28	34.6	151
337	509	15	106	30.5	2.04	149	389	2.35	23.7	13.8
9.56	11.4	21.5	112	58.8	2.13	65.5	179	2.89	31.9	8.2
294	400	53.8	80.6	21.9	1	27.6	73	8.82	50	16.4
117	151	14.7	77.7	23.3	2.53	32.2	85.1	2.02	12.5	7.57
710	1084	13.6	13.2	1.01	4.96	13.2	29.2	1	25.5	12.1
528	828	15	12.5	1	1.06	53.8	119	2.57	22.7	2.64
75.7	111	14.3	79.9	23.3	3.82	42.9	204	18.6	49.1	15.8
42.9	71.7	23.7	302	106	2.25	56.7	153	3.08	57.8	11.3
253	375	30	47.8	14.2	2.62	48.3	165	5.67	16.7	5.05
264	457	3.85	14.1	41.4	1	39.6	89.8	1.79	26.2	3.43
362	542	11.5	17.3	27.6	1.96	54.2	65.5	1.27	23.7	5.52
235	334	17.8	13.8	14.1	4.07	102	349	2.48	11.9	1
34.6	41	35.5	178	57.3	15.3	62.1	1055	2.09	18.4	8.82
127	219	30	50.5	14.9	2.79	18.6	73	3.13	28.1	6.26
267	362	18.1	44.1	19.1	1	19.6	63.2	2.17	27.1	7.43
62.6	63.8	4.83	142	26.2	1.32	79.1	308	3.25	38.9	9.73
372	599	10.9	107	17.9	1	36.5	79.1	4.87	30.8	9.91
1084	1611	18.6	11.4	12.5	1	19.1	111	3.25	10.6	6.04
2738	3889	11.3	86.6	13.3	19.1	64.4	1075	3.72	30	6.55
241	368	16.4	300	69.2	2.97	43.7	120	12.7	34	107
1241	1794	11.3	78.4	19.5	1.79	15	30.8	3.22	21.7	8.66
43.3	73	13.7	42.6	101	2.81	103	362	2.02	16	9.73
72.3	90.6	64.4	158	25	4.49	78.4	248	12.4	38.5	17.9
661	1037	10.3	77.7	14.1	1.54	20.5	60.4	3.43	18.1	4.91
292	457	43.7	334	92.2	2.94	69.2	227	1.3	13.9	4.07
91.4	133	11.7	112	39.6	1	28.1	77	19.8	55.7	17.9
130	155	41	67.9	18.1	7.99	33.7	111	2.11	15.7	3.96
111	143	8.35	16.1	39.6	10.2	58.8	1963	82.8	112	25.9
30.5	30.5	16.5	20	3.16	1.65	27.1	828	4.45	31.9	59.4
319	422	5.78	89	38.5	2	50	195	1	40	4.96
578	906	10.6	139	26.9	9.82	66.1	1554	1.76	20.2	11
449	644	5	111	18.3	2.59	84.3	172	1	15.4	3.25
117	213	15.3	158	44.1	3.13	161	375	12.6	43.3	16.4
615	939	11.4	63.8	14.9	21.9	67.3	1433	1	20.2	17
313	441	18.1	36.2	20.7	5.23	22.5	195	3.89	19.6	13.6
77.7	98.2	26.4	51.9	36.8	4.1	75.7	205	4.1	28.4	8.66
153	225	14.5	12.5	11.5	1	31.1	30.5	1	26.7	5.94
368	538	19.3	40.7	14.2	3.08	62.1	1554	1	19.1	7.43
349	533	18.1	17.6	12	6.15	46.1	149	6.92	29.4	167
1046	1486	18.9	18.1	15.5	1.86	31.3	113	1	17.6	6.98
334	533	31.9	41.8	1.86	1	22.5	22.9	1.33	44.5	11.7
922	1407	28.4	34.9	12.1	14.6	50	604	1.35	15.1	15.3
90.6	104	3.96	10.9	17.8	51.9	213	7041	1	16.8	9.22
1018	1486	13.1	23.9	25.9	5.42	44.9	1794	2.35	15.3	13.5
205	289	16.5	71	40	2.25	68.5	165	2.55	30.2	1
213	331	3.62	289	59.9	1	28.6	55.2	1.33	8.66	6.26
165	246	13.6	8.06	15.8	1	28.4	136	1	24.4	4.18
200	269	13.8	18.8	21.9	1.53	119	389	1	44.9	12
914	1420	18.1	127	49.6	1.02	48.7	167	2.86	30.2	20
143	281	19.5	34.6	8.82	1.86	196	368	1.98	66.7	9.06
142	253	13.1	13.8	7.5	2.62	42.2	88.2	1.19	44.5	5.94
229	328	17.3	16	1.04	7.37	44.1	1358	3.28	30.5	7.84
1778	2503	10.6	111	23.3	10.3	142	1946	1	35.5	1
85.8	127	26.9	39.2	12.3	16.3	52.3	1382	2.31	23.7	9.65
227	322	9.14	20.4	13.5	1.76	62.1	158	1.98	23.7	12.4
319	414	13.7	1	14.9	1	163	276	1	21.9	10.3
588	914	8.35	117	30.2	2.15	27.4	150	36.2	73	29.7
223	313	3.31	16.8	18.9	1.43	60.4	153	2.92	37.2	6.21
1252	1747	7.57	7.17	33.7	3.96	69.2	196	1.31	27.1	2.46
221	269	32.8	11.2	30	9.73	85.1	1611	1.36	14.5	8.51
414	615	13.8	25.7	17.5	3.72	55.2	237	6.85	32.8	23.7
209	302	23.7	17.6	5.23	11.3	102	2110	3.96	26.2	1
491	750	21.3	15.3	9.65	5.14	117	407	3.46	47	5.14
965	1554	5.67	57.8	24.4	3.65	73.7	255	1.13	37.5	2.76
359	594	10	10.6	1	1	41.4	117	9.14	43.7	34.9
1877	2690	23.1	27.6	4.74	9.22	77.7	322	1	22.9	14.1
292	433	56.7	123	55.7	6.04	239	1596	1.39	31.3	4.57
151	183	47.8	37.5	5.78	1	30	30.5	1	15.8	4.18
1055	1512	4.83	8.98	20.5	5.14	69.8	1407	1	36.5	10
250	362	19.6	85.1	27.4	23.7	82	1596	4.1	55.7	9.91
101	153	16.1	29.4	6.04	3.13	58.8	198	3.4	20.7	7.77
136	179	14.5	22.5	19.5	1	44.5	102	1	18.9	6.98
32.5	34	10.2	26.7	31.9	47.8	147	1999	1.47	27.9	10.8
866	1208	17.3	31.9	32.5	2.09	18.6	692	1	23.5	3.52
170	231	41.4	108	29.7	3.85	75.7	225	1.21	24.6	3.96
120	253	10.3	69.8	17	5.73	34.3	1046	1	31.1	2.74
184	259	5.38	131	23.7	11	50.5	1114	13.8	71.7	24.1
44.1	40.7	12.7	57.3	18.6	1	52.8	72.3	1	16.4	4.07
205	300	34	101	66.7	1.78	40	136	2.07	22.3	7.84
100	178	17.8	165	24.8	1	82	191	1.17	40.7	7.57
158	253	17.8	21.9	10	6.26	90.6	337	2.92	25.3	2.19
1928	2788	8.58	131	46.1	1	22.9	78.4	1.88	38.9	2.17
10.6	45.7	9.82	85.1	13.2	2.09	73.7	906	1.95	20.7	2.13
271	426	13.1	67.3	26.7	2.79	45.7	165	1.75	15.5	4.14
461	661	20.9	45.7	26.7	3	55.2	104	5.38	23.7	11.2
4.74	4.29	5.83	21.5	14.7	3.62	14.6	26.2	2.79	55.7	8.43
78.4	193	8.74	10.6	6.55	6.04	36.5	2329	2.39	13.2	10.8
308	478	12.4	205	30.8	28.6	132	4698	2.48	22.3	4.26
337	500	7.99	104	12.3	1.61	47.4	92.2	1	21.5	4.57
422	615	8.74	76.4	25.9	7.1	51.4	835	2.15	3.59	12.4
449	632	13.8	36.2	19.6	12.5	69.2	1009	15.4	42.6	18.4
33.4	27.6	9.82	34.6	15.1	2.33	35.5	204	1.04	27.9	26.4
87.4	94.7	9.91	60.4	18.4	2.21	67.3	165	1	15.7	10.9
164	241	12.1	18.3	14.2	1	40.7	89	3.55	34	3.59
77	114	14.1	27.1	15.7	3.16	50	2503	1.75	17.2	1
98.2	168	24.8	55.2	9.06	7.7	54.7	1370	1.73	40.3	5.09
32.5	37.2	46.1	1055	352	1.75	56.7	164	15	41.4	10
835	1219	8.51	49.6	17.9	8.51	126	389	1.26	41.4	9.39
103	186	8.2	189	24.8	4.33	22.3	77	1	31.3	12.3
117	157	8.2	16.4	28.1	15	101	355	2.59	44.1	9.91
1009	1540	55.2	79.1	10.4	3.05	29.7	698	2.07	11.4	3.62
777	1241	7.5	84.3	13.8	13.3	69.8	1843	6.15	21.9	7.91
410	704	5.99	105	28.6	3.75	29.2	139	1.31	30.8	4.45
1208	1685	15.7	13.7	13.8	8.06	50.5	1395	2.04	25	77
160	223	1	204	9.06	1.36	36.2	50.5	2.67	18.9	11
292	422	18.6	120	59.9	3.16	119	248	3.96	31.9	11.5
235	362	2.97	23.3	33.4	1	42.9	61	1.53	23.1	7.1
188	255	41.4	85.8	23.7	1.42	26.4	75	1	19.3	9.39
906	1433	15.1	19.3	4.14	1.33	75	147	1.91	19.6	10.8
25.5	24.8	47.4	108	57.8	6.67	48.7	319	1	33.7	9.31
229	325	13.7	82.8	21.5	4.29	18.6	62.1	2.79	30.2	1
385	610	44.1	65.5	28.9	2.13	27.1	61	1.04	27.1	10.9
835	1208	10.8	15.4	7.64	23.9	70.4	982	28.6	50.5	18.3
92.2	158	7.23	125	53.3	1.24	90.6	305	3.52	14.7	11.5
276	396	12.9	19.3	6.67	1.51	108	281	1.24	24.1	9.91
9.39	12	78.4	165	47.4	10.7	56.2	2714	3.82	34	2.29
146	191	22.9	24.8	9.73	20.2	64.9	1114	1	28.4	17.8
791	1155	9.73	109	36.2	1	50	111	1	15.8	10.1
1928	2690	17.2	379	175	2.94	21.3	68.5	1.58	22.1	2.97
311	441	12.9	24.8	26.7	1	49.6	82	1.83	7.43	3.43
289	422	6.44	198	24.8	15.3	59.4	1540	1	21.1	11.1
33.4	48.7	19.1	37.5	19.8	1.25	42.9	91.4	2.19	20.9	7.91
528	882	31.3	610	136	4.53	34.6	1731	1	19.1	9.73
255	365	18.1	13.7	15	7.23	75.7	2267	2.69	21.5	13.3
59.9	73.7	16.5	478	158	3.65	41	221	1	20.9	7.1
178	308	15.4	145	25	3.19	34.9	158	1	13.6	10.6
1310	1894	16.8	207	54.2	5.57	46.1	1625	3.62	35.5	41
50.9	103	57.3	107	8.98	3.19	97.3	246	16.1	43.3	18.3
1370	1928	7.77	257	23.5	9.47	157	355	1.53	16.7	3.85
375	588	13.6	18.4	16.1	1.15	77	198	18.9	57.8	19.1
147	219	12.7	40	17.3	5.09	49.6	233	1	35.5	7.1
153	237	16.8	56.2	20.2	1.42	31.1	35.2	3.19	10.2	1.68
209	292	25.7	113	48.3	2.48	38.5	125	4.45	40.7	89
279	414	12.4	26.9	8.66	4.49	58.3	130	4.07	28.9	4.83
982	1433	24.6	35.2	5.62	2.46	45.3	217	14.2	39.2	9.91
750	1155	6.67	103	50.5	1.86	28.9	106	1	44.5	10
519	806	9.91	73.7	12.2	3.62	89.8	308	2.41	24.1	3.34
170	286	19.3	3.02	21.3	2.09	25.7	54.7	1.31	30	16.3
244	359	23.9	22.7	14.5	2.19	44.5	193	10.5	30.2	34
594	947	1.54	403	56.2	1.57	52.8	154	1.23	29.4	7.5
50.9	61	41	109	15	2.25	56.7	1596	37.2	54.2	28.4
90.6	122	60.4	137	12.5	3.4	102	319	2.04	10.2	4.45
368	547	31.1	37.9	5.78	1.84	48.3	1134	3.59	35.5	5.83
710	1027	14.7	11.2	6.1	1.13	51.9	157	1	22.1	5.78
89	131	7.43	90.6	7.7	1	31.9	15.1	8.35	31.9	13.9
523	813	16.1	5.83	27.4	1.43	149	346	7.5	61.5	21.7
211	311	11.8	17.5	18.1	5.57	82.8	365	2.48	47.8	9.82
441	710	131	111	737	15.8	71.7	1275	3.4	30.5	7.57
56.2	100	14.6	16.1	5.94	1.88	57.8	195	1.25	17.5	5.62
213	340	12.4	78.4	22.7	1.18	40	178	3.02	32.2	11
331	429	4.03	15.8	61.5	5.33	89	365	4.66	56.7	205
262	355	34.9	219	71	1	58.3	173	2.17	21.1	2.46
76.4	79.9	36.5	193	56.2	1	33.1	84.3	5.33	7.5	11
1499	2091	11.2	173	44.5	3.46	160	583	2.79	22.5	7.04
50	56.7	16.7	13.3	6.73	1	15.5	68.5	2.5	14.2	7.37
225	313	10.5	89	36.2	3.37	69.8	267	1	27.6	3.34
225	359	17.8	15.3	5.38	31.1	85.1	1055	1.96	18.9	1.05
94.7	167	15.3	20.5	12.4	3.4	54.2	151	1	42.6	15.1
189	346	25.7	137	52.3	8.35	58.8	1499	2.17	16	11.3
426	661	4.78	20.5	46.6	5.42	123	241	8.66	31.9	2.25
172	286	17.8	14.2	1.27	1	137	267	1.54	12.5	1.79
491	704	12.1	83.5	26.2	26.4	246	8896	1	16.7	8.82
311	437	10.4	253	30.8	1.76	130	322	1.26	8.82	3.02
34.3	58.8	8.66	14.2	17.5	1.76	25.9	57.3	1.06	21.3	10.7
1230	1762	9.73	89.8	17.9	2.59	40.7	78.4	1	35.9	8.43
89.8	141	13.6	11.3	2.31	2.29	32.5	66.1	2.04	13.1	4.33
422	557	29.2	114	40	7.5	54.7	1322	27.1	120	38.2
173	297	9.39	17.9	8.51	6.21	71	319	1.35	18.6	3.65
302	445	13.3	25.7	2.53	7.17	90.6	1144	1.13	5.62	5.83
215	375	4.83	54.7	7.5	1	49.1	163	2.07	18.9	6.32
213	302	16.5	16.4	48.3	1	38.5	98.2	1	19.3	3.85
349	547	9.14	142	17.2	1.96	59.9	165	4.61	25.5	5.67
59.4	77	10.5	16	26.2	2.67	15.7	55.2	1.91	40.3	8.51
64.9	93.1	7.17	111	43.3	2.23	50.5	133	4.18	29.2	7.64
1084	1540	23.1	60.4	50	1.79	43.7	57.3	3.65	40.7	8.74
279	379	13.6	13.8	4.49	2.48	69.8	101	1.36	46.6	3.89
170	215	17.2	24.8	8.58	5.14	121	349	6.15	14.7	8.9
107	184	16.5	297	63.8	9.14	48.7	1433	20.4	44.9	17.9
835	1322	18.4	10.8	8.98	2.25	60.4	205	1.09	7.99	1.73
445	615	5.88	76.4	19.6	6.67	50.9	264	2.23	17.2	4.61
123	181	17.3	46.1	25	1.07	18.9	104	1	36.5	13.7
661	1075	15.1	21.3	12.1	1.43	23.1	59.4	1.03	5.47	4.29
403	638	13.8	31.9	36.2	1.26	29.2	63.8	2.84	12.6	6.1
168	233	16.1	61	28.6	1.76	35.5	131	14.5	45.3	22.7
311	483	12.2	9.06	8.58	1.03	63.2	213	38.2	74.3	12.6
1219	1827	64.4	98.2	10.5	1	26.7	85.1	1.27	22.9	20.7
319	491	31.1	168	34.9	1.39	75.7	129	2.48	25.7	8.58
235	316	13.5	75.7	16	1.86	87.4	204	1	16.1	10.5
76.4	125	7.37	163	15.7	3	47.8	142	1	24.8	5.47
429	667	4.07	15.4	25.7	1	47	87.4	2.79	31.1	49.1
433	610	14.7	108	51.9	1.57	110	269	7.23	39.2	10.4
32.2	70.4	13.7	72.3	17.6	2.02	31.6	82	48.3	139	59.9
40.3	46.6	11.3	17.9	5.94	2.92	132	279	2.23	13.1	5.52
271	418	18.3	149	38.5	23.7	75	1298	1.95	23.9	12
313	509	9.47	34.9	30.2	1.73	33.4	70.4	1.08	23.5	4.29
286	403	11.9	80.6	50.9	1.29	98.2	286	1.45	41	10.7
248	359	7.77	83.5	21.5	1	24.4	55.7	1.65	18.9	4.78
64.9	85.1	11.4	106	36.2	2.23	145	253	1	11.2	3.43
1433	2072	8.13	30.8	79.1	4.87	20.9	163	1.09	8.51	7.3
271	418	6.98	12.5	29.4	1	45.3	64.9	1.1	17.3	9.56
57.8	91.4	17.2	15.7	6.55	4.91	35.2	122	1.32	20.2	4.49
346	594	15.7	12.1	19.6	1	58.8	158	1.78	32.2	4.33
119	157	13.5	121	40.3	2.69	48.7	172	12.2	29.2	38.5
225	355	16.4	20	9.22	20.5	207	3023	20.9	84.3	46.6
111	147	3.79	10.7	29.7	7.64	50	1075	2.11	19.8	2.79
