# Supplementary material
Source: ML conference proceedings conference paper supplement (https://openreview.net/forum?id=nrbR2F29vU)
Supplement: supplementary_material [file 7. cd3cd28+ly.xls]

## Sheet: Sheet1
praf	pmek	plcg	PIP2	PIP3	p44/42	pakts473	PKA	PKC	P38	pjnk
14.6	18.6	18.3	16.3	3.16	4.57	16.7	474	6.85	26.2	28.6
17.2	39.6	15.1	13.5	6.49	5.05	18.6	567	15.5	75	9.91
15.8	15.1	3.75	191	3.72	7.64	19.6	770	12.2	21.1	12
9.39	14.7	8.28	75	16.1	16.4	21.5	253	12.9	37.5	2
9.82	6.04	2.21	179	20.7	26.9	27.4	385	10.1	22.5	5.57
9.65	10.6	38.5	55.2	22.1	5.67	13	253	11.7	8.66	16.4
33.7	19.6	8.9	28.4	20.9	6.85	18.8	1134	17.8	24.6	5.28
18.8	19.6	68.5	205	17.3	19.3	31.3	305	7.17	17.8	5.83
39.2	17.2	81.3	205	29.2	19.8	27.4	346	9.73	19.8	19.1
16.1	15.4	11.7	16.4	9.65	7.3	11.9	519	35.5	64.4	21.9
46.6	12.2	11.4	30.2	63.8	4.83	11.2	594	6.92	16.3	6.73
50.9	24.1	3.05	491	79.9	35.2	44.1	547	13.5	26.4	11.9
28.6	20.2	9.31	12.1	3.13	14.1	17.2	583	4.29	19.6	73.7
13.1	40	17.8	11.9	4.61	6.32	45.3	1065	24.1	44.1	10
48.7	22.5	26.9	514	154	13.1	21.5	835	27.9	78.4	32.5
37.2	19.5	16.8	16.8	1.68	17.5	31.1	538	20.7	46.6	14.3
11.3	6.21	17	13.3	1.23	9.31	14.3	457	15.5	29.2	14.2
47.8	18.1	5.83	47.8	6.55	14.7	19.8	85.8	18.6	47.8	26.4
17.5	29.4	10.4	14.6	4.03	29.2	35.5	331	12.1	25.5	21.5
38.2	20.5	6.61	17.9	23.9	11.3	27.6	947	24.1	47.4	17.8
2.55	12.4	1.83	200	16.7	3.05	15.8	655	20.2	36.8	10.7
52.8	21.3	1	21.1	1.21	7.23	19.3	547	14.6	31.9	1
41.8	45.3	4.26	157	23.9	23.9	43.3	355	14.6	26.2	13.8
67.3	24.8	6.98	16.5	29.7	13.8	45.3	2595	5.83	18.6	26.9
13.7	10.1	2.67	34	3.11	11.2	28.6	1981	19.3	37.5	26.4
15	39.6	14.9	414	77	6.61	6.73	400	23.3	40.7	77.7
21.9	18.3	1	89	5.88	3.89	12.4	491	9.06	27.4	16.7
67.9	40	5.38	13.8	63.2	2.07	15.1	723	17.6	40.7	17.6
10.2	13.5	15	34	26.4	1.73	6.26	106	10.5	18.9	25.5
15.8	22.1	5.09	20.2	44.5	7.77	26.4	599	12.5	30.5	23.9
85.1	106	11.9	67.9	11.3	21.1	32.5	389	10	27.9	13.7
57.8	16.5	1.93	157	13.9	18.6	24.4	491	13.1	18.9	19.5
9.56	24.4	4.91	184	17.6	11.2	18.9	874	3.37	12.9	112
27.9	27.4	9.14	68.5	13.7	13	26.9	528	12.4	19.6	10.1
17.8	17.2	25	31.1	2.29	19.3	25.9	311	17.3	29.7	18.9
34.9	15	7.1	5.23	21.5	21.3	35.2	583	15.1	34	25.5
75.7	17.6	11.1	30	5.23	28.6	46.6	225	15.4	40	18.4
38.5	16	9.47	136	29.2	8.98	10.4	170	17.9	33.7	17
34.3	36.5	43.7	63.8	19.6	5.38	16.7	331	20.5	40.7	9.65
20.4	15.7	16	24.4	5.14	4.78	5.23	164	13.1	23.5	11.3
22.5	19.5	6.32	188	14.1	9.82	13	673	6.32	23.7	105
73	24.1	14.3	82.8	3.13	18.9	31.3	385	20	36.8	13.5
34	10.8	79.1	165	16.5	5.83	17.3	267	20.5	60.4	93.1
50	25.5	47.4	257	20.7	1	4.07	188	3.82	18.4	89
48.7	25.5	16.1	122	67.3	28.6	41.4	538	18.3	45.7	15.5
61	25.5	4.87	207	46.6	24.1	27.9	382	1	15.1	96.5
64.4	33.4	13.5	28.6	1	18.9	33.7	403	3.85	8.74	73
65.5	29.7	7.37	127	20.7	13	32.2	626	24.4	48.3	24.4
43.7	13.3	18.3	23.1	6.79	8.35	5.78	200	5.57	12.5	15.1
33.4	23.3	5.38	198	66.7	10.6	24.6	685	18.1	33.4	8.2
13.5	10.7	9.39	3.59	29.7	4.91	34.3	227	13.7	33.1	12.2
11.7	4.37	12.7	46.1	22.5	4.96	18.3	914	17	47	17.2
12.5	19.3	14.3	55.7	32.8	3.05	10.4	274	3.4	26.7	114
84.3	35.2	11.2	18.3	63.2	4.33	9.56	325	2.41	372	26.9
38.2	15.8	5.67	136	18.1	33.1	69.2	379	22.9	71	43.3
28.1	9.22	5.94	132	18.1	25.5	46.6	557	17.6	30	13.2
11.7	8.74	26.9	42.2	15	17.3	23.9	474	4.57	13.2	21.7
1	3.46	5.83	3.34	3.13	11.7	24.8	352	22.3	48.3	18.9
136	48.7	3.43	19.1	25	4.49	18.6	274	23.9	44.1	5.42
19.5	13.8	8.74	14.9	24.4	12.5	24.4	632	35.5	64.9	18.4
42.9	12.4	11	9.06	4.7	11.8	31.6	305	2.07	17.5	82
5.28	5.57	16.3	22.3	18.9	20.7	28.4	466	17	27.6	14.3
79.1	50.5	24.6	53.8	40	10.7	21.1	445	19.1	41.8	10.8
81.3	16.8	4.14	445	62.1	5.33	20.2	1094	5.09	23.3	52.3
32.2	26.9	2.81	2.81	1.65	33.7	56.2	931	35.2	46.1	9.31
40	20	14.2	85.1	18.9	6.04	12.3	379	5	15.5	74.3
19.6	20.2	14.2	14.5	1.51	11.4	13.9	483	5.23	15.4	131
50.9	28.1	6.26	235	14.5	5.05	13.7	644	26.7	42.9	20.9
41.4	27.1	8.58	36.5	42.2	14.6	27.4	400	18.8	57.3	56.2
58.8	31.9	4.07	14.2	3.96	7.64	11.2	231	16.3	39.2	17.5
64.9	21.1	10.9	63.2	19.5	27.1	41.8	461	8.51	20	11.7
62.1	32.8	11.4	18.1	22.7	10.7	47	1963	6.98	15.3	5.73
32.2	28.1	20	19.6	3.19	8.28	15.3	110	23.7	58.3	9.56
63.8	64.4	2.25	231	18.9	18.8	39.6	843	17.6	37.9	20
22.1	26.7	3.65	26.4	10.6	14.2	26.4	737	30.5	42.9	16.7
63.2	38.9	10.1	66.7	14.1	7.23	15.3	340	3.52	38.2	130
132	54.7	10	44.1	109	13.5	30	267	27.1	47	18.6
26.9	24.4	22.7	17.2	6.44	21.5	27.6	407	16.7	45.7	123
39.2	17.6	59.4	119	12.7	16.4	28.6	313	54.7	74.3	19.3
42.9	17.6	1.43	62.1	12.9	18.6	80.6	5523	10.2	21.3	15.7
101	100	10.5	65.5	27.4	8.2	17.9	449	10	14.5	4.61
73	23.1	5.42	92.2	14.6	4.26	30.2	991	30.8	74.3	36.5
25.5	23.5	13.6	127	17.8	8.13	6.55	302	6.21	13.9	57.8
33.7	16.8	12.5	12.7	16.3	5.52	16	264	16.8	34.3	2.67
205	71	9.06	79.9	16.8	23.9	20.7	441	14.2	31.1	20.5
24.1	28.1	22.7	94.7	36.8	17.9	33.7	400	25.9	55.2	31.1
34	21.3	19.1	9.39	5.42	13.8	22.1	478	19.6	60.4	36.2
57.3	23.5	10.7	45.3	52.8	8.82	20.7	1512	10.6	24.4	12.7
55.2	22.3	17.6	22.5	9.39	23.7	27.6	375	24.6	53.8	22.5
77	21.1	12.2	22.1	3.13	6.61	22.9	445	26.9	38.2	10.3
59.4	41.4	9.73	14.9	6.15	9.06	20.4	500	30.2	56.7	14.5
9.39	27.9	13	22.5	17.5	19.5	26.9	426	28.6	36.5	18.6
16.5	33.4	1	403	35.5	16	33.1	710	16.4	29.4	19.5
61	40.7	13.5	14.5	5.83	7.99	13.6	757	11.3	23.9	7.37
63.8	34.9	8.82	85.8	17.5	14.7	26.9	604	2.92	16.8	64.4
45.7	12.1	80.6	90.6	23.3	7.84	15.7	362	64.9	100	16.5
39.2	10	4.45	15	27.6	10.6	17.8	437	11.8	28.6	40.3
120	85.8	9.73	114	13.3	8.06	15.8	578	6.85	21.1	75.7
5.78	1.01	8.82	60.4	31.1	15.5	31.3	730	3.31	15.8	56.2
35.2	10.4	10.2	10.4	26.4	10.8	26.4	604	20.9	48.3	16.5
19.6	46.6	1.63	37.9	7.5	13.1	19.3	528	21.9	60.4	44.5
34	18.8	42.9	89.8	44.9	4.61	17.9	673	25.7	49.1	25.5
47.4	28.9	9.14	19.5	73.7	19.3	27.6	453	3.34	20.5	61.5
44.1	28.4	17.2	22.5	13.5	13.3	20.2	313	23.7	33.4	14.5
119	29.4	16.1	15.3	9.82	18.6	28.6	396	49.6	64.4	18.8
53.8	23.9	8.82	97.3	24.6	3.96	7.57	153	15.1	28.1	15.7
164	72.3	3.89	11.4	40.7	10.9	29.2	1928	25.5	41.4	25.7
42.2	22.3	1.36	38.5	21.5	24.1	39.6	588	20.4	34	16.4
71	66.7	4.91	11.4	14.2	5	16	346	18.3	33.4	13.2
59.9	32.8	12.7	12.5	17.5	39.6	61	882	32.2	73	26.7
41.4	28.9	15.3	30.2	13	18.6	41	557	4.87	27.1	71.7
25.9	19.3	13.5	20	5.05	15.4	33.1	757	27.9	56.2	13.8
78.4	44.1	16.3	16.5	3.16	94.7	198	1055	6.67	16.3	17.5
47	57.3	9.39	164	52.8	9.31	14.6	638	10	29.7	9.47
17.3	28.9	10.2	88.2	9.82	22.7	24.1	328	21.9	37.9	14.1
53.3	19.8	13.2	34.3	22.1	9.56	16.3	638	2.33	12	53.3
20.5	15	10.3	12.6	29.4	34	70.4	1762	3.68	17.2	127
55.2	27.4	55.7	131	31.1	10.2	20.7	375	8.66	23.3	26.9
84.3	23.1	3.31	311	25.5	4.87	10.4	244	10.1	29.4	57.8
135	198	5.38	120	13.7	9.73	23.1	519	10.1	26.9	13.9
25.3	17.5	6.15	126	23.7	6.98	18.8	56.7	8.28	14.7	10.2
42.6	23.3	16.4	40	1.75	6.55	10.5	610	11.9	25.9	45.7
71	40.7	13	157	40.3	5.19	11.4	1	2.76	21.1	74.3
62.6	26.4	9.22	15.8	61.5	6.26	9.91	311	2.97	17.3	124
51.4	25.5	7.64	77.7	23.1	14.2	22.9	311	27.6	44.9	16.4
63.8	24.6	22.5	12.7	20.7	14.9	26.9	655	7.04	23.5	91.4
73.7	34.9	19.3	85.1	47.4	8.98	20.7	538	24.1	30.5	17
46.6	19.3	13.5	37.5	123	9.06	14.1	717	2.57	20.2	106
45.7	14.9	5.88	14.6	25	21.5	36.2	445	6.67	15.4	49.6
86.6	36.5	1	461	36.8	42.2	54.7	227	5.88	13.8	42.6
30.5	23.1	6.26	157	9.91	8.66	20.9	237	23.5	36.2	5.33
35.2	9.14	17.2	12.4	3.62	18.8	34	784	20	39.6	15.1
211	88.2	5.88	205	17.9	26.4	34	305	14.9	41	11.8
43.7	21.5	10.5	29.7	26.2	11.4	19.5	422	11.7	39.6	9.22
19.5	13.8	19.3	14.1	1.27	5.23	33.7	1046	32.2	75	42.6
118	64.4	35.5	100	121	21.7	36.2	922	1.24	34	1
64.4	24.8	91.4	188	50.5	1.96	13.8	523	4.26	22.5	122
43.7	26.7	49.6	59.9	11.7	11.8	41.4	3523	39.6	83.5	72.3
81.3	39.6	18.6	21.7	4.45	5.47	18.1	67.9	3.28	14.3	70.4
58.8	28.1	18.9	38.9	43.7	4.96	17.8	562	26.9	57.3	20.9
21.7	18.6	11.1	19.5	12.7	19.6	34	305	17.6	30	12.2
62.1	27.1	2.62	178	28.1	58.3	89	1526	34.3	63.8	20.9
24.6	25.5	10.6	18.1	1.31	2.17	31.9	3.02	12.7	30.5	20.5
6.1	21.3	1.89	196	40.3	53.3	93.1	1197	20.2	29.7	2.37
154	86.6	34	337	160	25.5	47.4	1486	3.28	35.2	231
73.7	34.9	24.4	331	70.4	3.96	10.8	426	7.57	27.4	20.4
70.4	37.5	6.55	8.66	6.67	12.3	13.5	300	21.7	50.5	12.1
77	26.4	17.8	14.2	13.9	34	53.3	491	6.44	13.8	10.4
11.8	22.5	5.73	8.98	12.6	7.1	20.5	947	18.3	33.7	20.5
18.1	22.7	4.07	163	12.2	14.1	28.4	610	7.3	10.7	4.18
32.5	25.7	6.55	264	61	9.22	14.6	523	23.1	39.2	18.8
49.6	46.1	9.06	47.8	25	7.37	16.5	441	10.1	13.6	6.21
41.8	23.9	4.53	14.5	32.2	12.3	24.1	441	17.9	29.2	12.4
20.5	32.5	10.1	55.7	18.8	3.68	24.6	311	2.25	18.8	68.5
58.8	17.5	13.6	23.9	2.25	6.15	12.4	264	3.02	22.9	85.1
41.4	26.4	44.9	110	24.6	3.72	3.16	667	3.08	11.2	51.4
34.9	16.5	4.33	72.3	25.9	39.6	70.4	1230	12.6	30.5	42.2
20	19.1	10.2	14.3	16.7	21.1	19.6	325	21.7	38.9	20.5
179	27.9	6.49	10.2	7.91	7.77	10.3	626	15.8	22.7	17
51.9	30.2	8.74	96.5	25.3	6.92	15	483	10.1	28.6	27.4
92.2	69.8	13.9	17.9	12.9	17.2	27.6	491	15.7	34.9	17.9
48.3	15.7	10.1	87.4	11	28.1	49.1	552	25.9	46.6	16.8
85.1	27.9	17.2	437	107	16.3	27.9	621	22.3	39.2	27.9
36.5	19.8	6.38	14.7	24.8	44.1	183	1208	7.64	27.9	111
73.7	27.6	11.3	25.7	26.7	18.1	28.9	233	4.29	27.6	125
19.3	27.4	13.7	131	51.4	11.4	18.1	673	5.47	10.4	21.5
28.9	21.7	11.7	71	21.3	13.3	21.5	947	27.9	44.5	9.82
50.9	120	27.4	37.5	20.2	20.4	39.2	466	7.37	17.2	27.4
73	28.6	14.1	23.3	3.43	379	730	3854	14.9	33.7	16.5
62.1	27.1	11.9	21.3	8.9	7.17	33.4	1027	5.14	8.74	67.9
34.9	24.8	111	221	28.6	43.7	71	1747	22.7	49.1	15.7
66.1	63.8	9.91	88.2	25.7	6.49	17.9	730	18.3	37.9	8.51
26.9	17.3	6.92	17.9	18.3	6.79	17.3	717	26.7	41.4	30.5
78.4	21.1	8.43	32.2	40.3	5.78	17.9	213	10.5	23.7	11.2
37.5	31.1	16.3	17.5	5.99	5.33	11	328	21.7	34.6	11.9
55.2	10.8	6.1	8.06	18.6	12.7	49.1	1252	28.9	47	24.8
55.7	24.8	9.31	114	15.4	10.2	17.2	414	17.2	32.5	13.1
49.1	18.4	14.6	23.7	6.49	4.7	12.7	136	3.92	25	127
61.5	21.1	11	13.6	33.7	5.57	45.3	1197	17.8	35.9	15.5
3.37	11.7	21.1	54.7	5.52	21.7	27.1	1104	12.6	36.8	105
181	93.9	8.74	147	19.3	18.8	18.6	355	7.57	15.7	73
16	25.7	16.1	82	14.5	4.83	12.5	319	28.6	47.4	8.13
27.1	41.8	13.3	18.1	15.8	7.43	16.5	562	30.5	48.3	20.5
131	72.3	9.47	17.5	22.5	9.31	15.1	533	9.39	32.8	178
65.5	31.1	15.1	17.2	2.64	21.9	29.7	547	26.7	44.5	17.3
6.61	18.8	1.14	141	12.3	22.5	22.7	437	18.4	23.1	10.5
27.6	18.6	17.6	13.2	15.7	18.8	37.5	505	6.1	21.7	21.7
71	38.9	5.62	7.37	5.73	8.66	19.3	939	12.7	30.2	15
98.2	36.8	13.9	31.1	47.4	18.6	27.6	346	17.5	35.5	19.6
50.5	23.5	7.77	10.6	41.8	9.56	19.6	644	24.1	53.8	15.7
112	47.8	2.84	193	39.6	4.26	14.6	828	10.1	18.8	70.4
83.5	54.2	13.1	21.1	8.2	23.5	36.5	426	24.1	48.3	24.6
33.4	24.6	3.34	17.8	6.79	8.66	12.9	1037	28.4	38.2	23.3
106	47.8	6.61	11.1	42.9	103	255	1981	28.9	44.5	21.9
25.3	40	13.8	17.6	7.57	9.31	17.5	813	6.85	15.7	4.14
10.8	19.5	12.5	107	18.1	3.68	13.8	723	10.7	16.7	50.9
3.16	4.26	12.1	73	26.9	160	207	1275	9.39	23.5	26.7
79.9	34	8.74	22.3	73.7	13.9	23.7	496	21.9	48.3	11.8
93.1	44.9	9.65	28.4	16	17.3	23.5	615	23.7	44.9	8.28
37.5	18.3	15.3	16.1	10.3	3.62	19.3	1208	24.8	43.3	30
35.9	16.1	10.6	8.35	11.2	22.9	33.1	154	21.5	40.3	14.3
107	30	8.66	38.2	9.82	6.26	8.13	466	5.88	27.6	155
102	32.5	5.78	297	29.4	2.46	13.1	41	15.3	24.6	19.3
32.8	26.7	15.1	29.4	9.39	45.7	63.8	1144	16	28.4	9.82
100	27.1	8.13	94.7	22.7	4.41	14.7	257	12.9	32.5	49.1
90.6	58.3	4.41	132	13.6	16.4	68.5	3854	26.7	71	39.6
100	25.7	1	241	33.7	19.5	29.4	552	24.1	47	27.9
75.7	29.7	9.31	151	32.8	14.1	49.1	547	20.9	40.3	11.4
53.8	20.7	13.8	82.8	31.3	3.08	12.7	375	18.9	30.8	7.04
90.6	44.5	5.14	11.7	51.4	18.3	27.9	325	45.7	67.3	26.4
69.8	47.4	18.8	135	23.7	8.06	36.8	1778	9.91	24.4	16.8
193	61	28.9	74.3	35.2	27.1	40.7	259	40.3	53.8	11.3
85.8	22.3	7.23	104	26.9	23.5	38.5	509	30.5	58.3	35.5
67.9	14.9	10.7	41	20	34.3	50.9	337	19.3	34.6	22.1
19.1	9.82	2.21	5	12.5	3.72	20.2	1731	2.59	30.8	141
16.1	15.3	31.9	50.9	32.2	20.9	33.1	349	25.3	47	24.4
95.6	28.9	1.84	14.5	49.6	22.7	55.7	906	7.43	28.9	124
49.1	21.3	4.91	89.8	21.7	2.62	17.9	947	9.73	47	264
18.9	26.2	10.7	155	23.1	12.5	27.1	567	15.7	25.9	37.5
74.3	36.5	20.9	9.06	6.21	2.48	13.7	491	4.74	16.4	71.7
25.7	24.6	10.6	35.9	10	15.1	35.5	698	37.2	53.3	16.4
61	31.1	7.91	7.64	35.9	15.7	28.9	610	24.4	39.6	16.8
27.1	16.4	12.2	135	22.5	8.2	19.8	757	17.5	43.7	2.31
151	48.7	10.8	29.7	64.9	5.88	21.5	685	1	86.6	3.05
179	77	11.1	207	45.3	4.14	8.28	133	12.7	19.3	36.5
154	136	24.6	26.4	4.78	2.21	12.7	509	23.7	31.3	8.82
73.7	36.2	27.9	157	61	12.9	16	237	5.28	18.4	66.7
95.6	42.9	9.65	74.3	45.3	13	70.4	1811	24.1	50.5	16.3
55.2	51.4	17.6	18.3	16.7	17.5	19.5	319	1.84	12.6	67.9
36.5	10.5	10.5	19.5	9.91	15.7	26.4	400	3.92	17	55.7
30.5	15.7	4.57	18.9	32.5	11.9	12.9	655	5.73	9.91	59.4
158	37.2	16.7	20.9	4.66	14.7	17.6	375	15.4	22.5	20.4
49.6	31.9	39.2	246	69.2	7.3	16.5	457	12.2	15.8	6.73
89.8	35.9	15.4	51.9	14.2	25.7	56.2	1165	17.3	22.3	6.92
35.9	18.1	10.2	17.9	23.1	40.7	70.4	1596	9.31	20.4	2.41
67.9	28.9	15	16.8	12.6	6.92	18.8	890	7.99	19.6	85.1
89	31.6	15.3	41.4	73.7	42.2	52.8	379	20.2	50.9	29.7
57.8	21.7	4.18	64.4	9.39	5.14	69.2	1322	32.8	56.2	11.9
85.1	38.2	17.2	19.8	3.08	12.2	32.8	890	4.37	24.4	86.6
24.8	21.5	3.28	173	10.1	37.5	56.7	698	21.3	35.2	11.7
63.8	19.6	14.7	36.2	46.1	11.1	51.4	1334	8.82	11.1	41.8
78.4	33.1	19.3	25.9	3.89	17.6	21.5	418	26.2	55.7	19.3
73.7	32.8	2.23	17.8	16.3	31.1	44.9	267	27.9	47	24.6
117	40.3	11.2	137	20.7	23.3	35.2	649	9.14	12.1	69.2
117	78.4	11.3	11.4	6.21	1.64	6.55	673	2.92	22.7	47.4
34.3	20.5	5.94	52.3	18.9	6.92	18.1	538	61	91.4	8.35
179	34.6	11.1	14.3	1	61	175	1499	4.22	20.5	117
106	39.2	2.74	155	7.37	17	34.6	557	27.4	55.7	46.6
39.2	17.8	5.67	205	64.4	14.7	31.1	340	26.2	54.2	69.8
71.7	25.7	16	12.4	19.1	24.4	27.9	274	3.79	23.3	85.1
13.9	21.1	15.8	35.9	16.5	11.7	15	1322	13	23.7	13.1
91.4	80.6	6.49	67.3	18.4	8.58	10.3	466	2.92	21.7	110
50.5	13.6	12.2	15.3	21.9	20.5	26.9	365	23.3	44.1	19.8
34	15.7	12	81.3	27.9	15	30.2	500	5.23	14.5	74.3
48.7	19.5	25.7	14.5	4.87	22.1	34.6	414	30.5	53.8	14.6
84.3	34.6	10	15.3	12.9	7.77	22.5	375	34.3	53.3	21.7
44.5	18.1	18.8	41.8	20.4	18.1	22.1	466	23.9	40.3	21.1
31.3	21.3	10.3	33.1	81.3	16.1	23.5	588	21.3	41.8	21.3
79.1	59.4	24.4	34.9	3.46	22.5	42.2	422	23.3	34.6	14.3
42.6	21.7	11.7	40.3	2.74	10.5	25	610	8.06	35.5	99.1
51.4	38.9	13.3	15.7	6.38	17.8	29.2	621	1.65	16.5	86.6
63.8	51.4	9.06	13.3	8.2	14.9	24.6	523	26.2	40.7	18.8
14.2	18.4	18.8	64.9	23.3	9.39	21.9	757	31.6	47.8	15.1
42.9	20.4	37.2	117	83.5	13.8	21.9	578	13.1	33.4	172
26.4	17.2	9.82	164	30.8	5.67	16	1219	4.96	19.1	86.6
6.21	4.87	49.1	66.1	21.1	6.55	16.8	914	18.4	30.2	9.91
31.6	20.7	13.7	16.3	4.53	19.5	30.8	449	33.4	44.9	13.3
78.4	25.7	12.5	28.4	49.1	24.1	31.3	346	8.98	24.6	9.82
30	9.31	18.6	19.3	13.5	8.13	33.1	466	6.26	34	107
50.5	18.8	16.8	23.9	16.4	25	23.9	227	2.27	11.5	97.3
23.9	20	8.51	99.1	18.3	5.28	20.2	813	13.2	32.5	19.6
73.7	23.3	16	33.1	49.6	4.33	6.55	106	3.37	41.4	119
11	14.7	15.8	42.9	18.3	16	33.4	362	37.9	56.7	45.3
65.5	25.3	12.3	145	19.8	4.03	14.3	914	4.57	22.5	77.7
21.7	8.2	9.31	17.5	63.2	7.43	15.7	429	7.3	17.6	58.8
63.8	18.4	7.04	143	23.7	49.6	65.5	1433	2.33	16.4	60.4
104	60.4	2.11	173	14.7	11.8	15.1	410	26.4	50.9	19.5
25.7	18.4	8.06	22.1	44.5	17.2	26.2	284	28.1	44.5	23.1
17.3	21.7	35.2	37.5	22.3	8.28	11.1	533	2.74	13.3	97.3
8.43	36.8	24.1	22.9	9.39	14.7	20.4	685	12.5	15.1	5.09
57.8	16.5	11.2	83.5	11.8	31.3	44.1	1794	18.1	35.5	11.7
91.4	104	38.9	70.4	26.2	33.7	62.6	956	11.4	23.7	10.7
79.9	36.5	8.13	93.9	8.43	9.91	16.7	644	20	39.2	7.3
81.3	32.5	7.64	35.9	3.65	9.22	17.5	400	47	70.4	27.6
107	30.5	1.95	9.47	7.91	54.7	82	1459	23.5	42.9	13.1
99.1	36.2	16.7	17.9	17.5	1.63	21.5	956	31.3	52.3	22.5
93.9	45.3	4.91	23.1	10.6	12.1	7.99	692	8.35	21.7	82.8
38.9	18.4	13.7	14.9	10.5	8.58	23.3	410	6.44	12	80.6
78.4	20.9	9.56	17	45.7	16.8	24.6	528	26.2	44.5	7.04
33.1	26.4	15.1	11	15.1	18.6	27.9	828	21.5	37.2	10.6
60.4	22.5	12.5	31.9	2.05	20.9	34.3	519	6.61	12.1	64.4
70.4	23.1	6.15	331	49.6	34.9	70.4	1310	16.1	33.1	13.2
51.9	29.4	61	121	79.9	9.82	27.9	1275	10.6	24.4	5.47
93.9	27.4	5.52	16.5	26.2	10.6	14.3	204	5.47	19.1	109
93.9	30.2	1.88	422	25.7	3.92	16.5	717	1	115	7.43
33.1	9.31	14.9	12.6	7.84	17.2	75.7	2571	15.3	36.8	19.3
37.9	19.6	1	184	24.8	19.3	30.8	588	20.4	28.6	26.2
45.3	27.9	5.62	87.4	15.4	4.26	19.1	866	20.4	38.9	26.4
105	80.6	18.4	8.98	7.5	16.3	26.2	414	11	13.2	10.5
75	31.9	11.7	93.1	16	3.22	15.4	95.6	11.8	33.1	42.2
98.2	21.5	7.43	75	20.5	6.92	10.8	496	27.9	48.7	16.7
78.4	24.8	5.88	163	26.9	13	25	638	27.1	44.9	13.6
147	31.1	17.3	19.1	11.5	11.7	23.3	599	36.5	57.3	14.2
14.5	13	7.04	17.9	1.68	9.22	22.7	445	16	35.5	10.6
121	33.7	4.14	90.6	29.4	6.26	7.04	181	8.74	24.6	90.6
89.8	32.8	8.2	36.8	35.2	12.9	26.7	717	2.17	11.7	24.8
31.3	13.1	9.22	101	12.4	6.73	13.6	422	19.6	33.1	10
27.9	17.8	9.31	112	12.5	4.7	8.98	198	26.2	50.5	15.1
59.9	16.4	29.7	71.7	119	12.7	15.7	429	17.6	37.9	21.1
44.5	20.7	24.1	186	45.7	13.6	29.7	461	15.7	36.2	12.4
85.1	22.9	48.7	69.2	12.2	11.1	23.3	649	21.3	58.3	10.6
191	84.3	13.8	207	38.2	6.61	37.2	1322	3.28	3.96	2.25
106	22.9	2.59	83.5	27.4	29.7	38.9	396	11.2	20.5	9.56
40.3	19.6	6.73	311	92.2	5.38	9.56	588	16	38.5	11.2
55.7	49.6	4.26	12.5	33.4	3.89	14.6	9.73	17.2	45.7	95.6
45.3	29.2	4.33	14.5	6.38	8.43	20.9	533	78.4	127	16.7
108	79.9	42.6	77	8.98	34.9	61.5	1197	6.79	14.1	58.3
108	51.4	10.8	54.2	20	25	32.8	259	6.73	12.1	34.9
59.9	19.1	8.2	149	29.7	12.3	20.5	552	13.8	31.3	16.1
69.8	22.3	13.5	418	87.4	6.44	46.6	259	19.5	39.6	15.8
85.1	27.6	2.35	9.56	21.9	10.2	25.7	514	20.2	50.9	9.47
120	48.3	13.9	10.6	11.3	6.67	25.3	429	3.75	45.3	233
151	44.5	5.62	142	13	6.38	11.7	259	14.5	37.5	12
120	99.1	7.1	135	28.1	7.43	20.7	638	5.83	27.4	136
131	115	10.3	58.8	10.5	21.9	34	478	8.35	22.3	10.2
133	57.3	10.3	15.1	1.13	5.78	40	626	6.79	12.4	37.9
106	35.5	15	18.6	9.56	8.2	20.7	679	24.4	47	13.2
22.9	17.9	35.2	63.2	23.5	7.37	11.1	523	35.9	58.3	13.8
35.9	16.8	17.3	198	33.1	17.3	35.2	294	1.51	9.22	72.3
47	44.9	11.1	13.9	37.9	24.8	20	547	18.3	44.5	17.8
38.9	26.9	11	68.5	17.5	18.9	25.5	418	40	62.6	22.3
54.7	28.4	12.7	53.3	85.1	38.2	57.3	882	28.9	46.6	19.3
46.6	20.4	19.5	27.4	9.06	19.1	18.8	583	14.5	34	13.6
78.4	32.8	15.1	13.3	11	7.91	22.5	1094	17.6	36.8	14.5
49.1	24.8	10.6	18.1	25.3	12.4	28.9	389	7.43	20.5	69.8
59.4	18.3	5.67	143	42.9	15.4	28.4	483	18.4	28.6	10.2
109	38.2	7.91	14.5	25.3	23.7	28.4	487	21.3	39.6	24.6
78.4	76.4	3.37	147	8.35	5.94	18.6	737	3.4	18.6	66.7
39.2	12.3	12.1	132	17.9	11	20.9	973	13.9	29.2	19.1
89	34.9	13.9	27.4	87.4	14.1	21.1	638	22.9	28.9	15.8
74.3	17.8	8.51	123	34	44.1	67.3	400	17.2	46.6	25
47.4	22.9	3.11	15.7	9.91	10.6	23.9	400	17.6	32.2	12.2
60.4	24.8	11.1	1114	126	7.43	9.65	615	1.13	112	6.1
80.6	20.9	13.6	76.4	20.2	28.9	35.5	246	8.2	18.4	74.3
21.5	18.1	9.56	108	26.2	10.5	7.5	433	10.4	24.4	10.9
189	61	10.5	150	25.7	9.47	26.9	552	4.03	15.3	62.1
31.6	16.8	6.61	3.52	5.67	16.4	39.6	1009	2.19	23.9	112
115	36.8	11.3	17.6	3.59	36.5	51.9	316	9.47	18.8	2.11
114	59.4	7.91	17.3	31.3	18.8	27.1	322	25.3	52.3	35.5
17.9	25.3	22.7	43.3	91.4	13.8	20.4	429	6.15	15.3	91.4
39.2	14.5	1.96	215	33.4	8.9	20.7	437	6.26	17.8	17.2
126	142	17.3	10	3.25	7.64	28.4	382	8.58	20	8.58
35.9	22.7	7.7	22.9	9.73	6.73	15	610	28.1	44.9	17.3
207	56.7	3.52	172	20	5.67	19.3	316	17.8	48.3	56.7
62.1	27.6	16.1	37.5	32.8	19.5	38.9	470	3.59	27.1	96.5
101	39.2	33.4	91.4	52.8	8.43	27.9	223	15.4	30.5	5.73
15.1	14.7	4.07	19.5	38.2	2.94	18.4	3.4	21.5	46.6	15.7
105	105	7.7	26.4	25.9	7.04	38.5	890	23.5	59.4	200
62.6	33.4	10.1	51.9	18.3	17.5	32.8	313	31.6	53.8	12.7
30.5	27.9	13	20.5	5.57	4.78	15.3	615	45.7	77.7	14.1
5.99	19.3	9.73	10.9	48.3	16.5	24.6	679	53.3	73	25
8.82	4.96	8.98	17.5	56.7	11	21.9	389	20.9	49.1	13.3
37.2	20.9	13.7	26.2	63.2	6.44	15.8	578	3.79	16.5	47.8
16.3	9.47	10.2	65.5	28.6	13.3	24.6	692	13.8	29.2	41
24.6	35.9	10.6	11.7	31.6	15.5	26.9	407	48.7	84.3	30
75.7	21.1	25.9	122	66.1	23.7	39.6	328	23.5	41.8	8.66
80.6	34	8.43	127	23.5	38.2	62.6	2091	2.33	3.4	6.79
33.1	11.2	13.2	86.6	10.8	26.2	39.6	382	49.1	73	20.2
33.4	15.7	2.62	271	33.4	8.58	16.7	509	12.1	25.9	20.9
34.3	16.4	16.1	21.5	5.78	25.7	45.7	433	13.5	32.2	18.4
44.9	20.4	18.4	23.7	7.17	11.5	19.8	337	17.6	45.7	25.3
36.5	16.3	17.5	42.6	58.3	8.74	20.9	599	31.9	76.4	20.9
138	39.2	1.88	149	15.3	10.6	15.4	737	1	82.8	5.67
68.5	34.6	20.2	40	65.5	11.7	24.8	583	22.7	47.8	22.9
13.7	7.5	16.7	8.06	10.9	14.7	27.9	538	14.6	34.3	13.3
75.7	44.9	6.98	50	11.1	10.8	17	594	18.4	26.2	15.8
35.9	36.8	2.25	3.62	12.7	9.82	21.5	519	1.72	18.3	78.4
69.8	28.6	2.11	181	28.6	14.2	47.8	730	25.5	42.6	22.7
68.5	39.6	16.3	21.7	34.3	4.91	22.3	403	24.6	41.8	15.7
38.9	16	1.68	186	29.4	58.3	96.5	1611	2.46	8.13	22.5
35.2	29.7	18.3	47.8	48.3	17.2	31.1	445	10.1	17.6	10
29.7	20.2	12.7	22.7	5.88	11.1	23.7	237	25.3	42.9	17.2
61.5	23.9	25.7	122	35.2	104	160	649	2.02	10	73
129	42.9	2.97	4.26	6.1	8.13	19.3	346	8.28	26.9	50
91.4	27.6	6.98	25.3	26.4	5.23	12.5	906	25.5	45.3	17.3
66.7	23.7	9.39	16	40	17.3	29.2	407	15.7	41.8	7.57
79.1	31.1	18.4	44.5	26.7	4.07	19.3	965	11.9	16.3	9.91
61	42.6	1	334	22.1	8.06	32.5	820	6.04	12.3	4.78
51.9	16.8	11.4	12.6	16.7	2.81	20.5	858	14.1	28.9	14.3
13.7	9.82	5.33	109	29.4	25.3	38.5	445	15.3	24.6	9.31
22.5	14.2	7.04	195	31.6	43.7	63.8	1486	8.98	24.1	8.28
46.1	21.9	1.45	2.76	7.1	11.1	25.5	638	18.8	36.2	13.9
13.7	25.9	23.9	36.8	11.9	8.28	21.9	799	25.7	47.8	16.1
27.4	14.1	18.8	20.5	3.4	10.9	16.4	196	17.5	35.2	15.1
73.7	30	23.5	73.7	23.9	8.82	21.3	813	17.3	41.8	8.2
17.2	21.9	13.3	12.2	19.8	4.29	2.74	445	20.9	25.7	20.2
59.4	20.7	15.7	28.1	15.5	23.5	26.2	389	4.03	18.4	77.7
67.3	30.2	12.6	667	86.6	24.1	41.8	253	7.23	13.8	6.98
39.2	18.9	12.3	47	25.9	30.8	45.3	457	9.82	27.6	75
67.9	31.3	9.56	91.4	23.5	51.9	82.8	2207	24.1	43.7	8.98
52.3	45.7	5.62	129	19.1	30.2	64.4	673	57.8	84.3	31.1
89	38.2	7.17	13.2	18.4	18.8	25	349	20.4	34	17.9
54.2	20.7	1	105	13.1	22.3	42.9	1134	2.15	7.77	76.4
51.9	58.8	6.44	176	10.3	4.37	18.3	851	13.1	25.7	21.1
31.3	10.4	10.7	118	29.4	19.8	27.6	322	23.9	39.2	22.3
69.8	34.6	9.65	223	36.8	12.4	18.4	851	1.51	72.3	11.3
28.9	29.4	23.7	50.9	93.9	6.98	19.1	552	15.5	29.2	12.7
95.6	49.1	4.41	141	10.8	9.91	20.5	519	20	44.5	15.5
47.4	21.7	7.37	16.8	5.57	16.7	23.3	325	17.2	32.2	16.1
61.5	40.7	11.3	90.6	20.4	3.96	7.04	186	17.2	34.3	12.7
40.7	25	23.9	264	58.8	15.8	33.7	638	20.9	35.9	9.22
46.1	29.7	9.73	13.7	8.51	24.6	36.2	483	19.8	36.2	9.39
32.8	19.1	5.62	19.8	13.9	21.9	33.7	368	25.7	49.6	13.3
93.9	23.3	5.99	219	38.2	10.2	20.5	594	11.1	23.7	5.38
67.3	33.4	20.5	25	1.78	7.99	16.3	667	11	34	9.14
37.2	11.8	17.9	16.1	17.9	13.1	62.6	2864	32.2	62.6	37.5
38.2	22.5	13.2	8.66	9.14	6.1	6.61	470	4	21.1	115
20.7	22.7	21.7	21.7	14.6	9.65	45.7	1104	5.28	43.3	205
13.6	13.7	5.94	10.3	17.2	8.2	24.6	429	24.1	51.9	20
173	193	10.8	14.3	9.14	17.6	31.3	248	20.4	58.8	20.7
14.7	18.6	11.2	45.3	10.1	22.5	27.4	209	11.1	33.1	16
75	25	5.28	133	44.1	31.3	53.3	1000	15.8	42.9	64.4
85.8	67.3	8.06	32.2	31.3	35.2	40	403	2.59	25.3	49.6
87.4	44.5	34.6	47.8	17.2	18.6	33.7	300	10.9	32.2	46.1
38.2	24.4	22.9	20.2	11.1	3.19	23.3	851	2.86	11.3	31.6
38.2	24.1	1.21	514	59.9	26.9	41.8	509	3.72	23.9	154
40	12.2	11.2	21.5	44.1	21.7	32.2	478	15.3	41.8	18.8
77.7	20.9	45.7	50.9	16.8	32.8	48.7	1433	17.2	31.9	7.91
74.3	29.7	2.46	219	13	9.06	20.4	750	48.3	89	31.3
41.8	20.2	9.47	149	41.4	34.9	75.7	1241	3.08	24.8	25.5
49.1	22.1	2.79	83.5	16.4	8.9	15.5	449	20.7	39.2	23.5
50	27.1	7.7	16	41	8.82	11.8	784	22.7	47.8	15.3
29.2	45.7	7.04	62.1	17	10.1	23.5	685	13.8	36.2	104
80.6	36.8	6.92	98.2	17.6	13.6	21.3	626	11.3	42.2	153
65.5	32.2	9.39	15.5	13.5	7.77	23.9	1554	15.7	32.2	8.98
179	55.7	18.8	509	80.6	11.5	16	164	25	33.7	15
34	24.1	3.65	47.8	31.9	22.5	59.9	1358	38.9	67.3	18.9
55.7	35.5	47.4	73	176	8.98	20.9	552	16.3	25.5	13
80.6	36.5	4.61	89	10.2	19.5	28.9	533	10.5	23.9	50.9
31.3	32.8	10.6	25.7	49.1	11.4	38.9	1596	23.9	51.4	13.1
49.6	32.2	17.9	7.84	9.31	6.79	13.5	604	16.3	28.9	11.1
167	79.1	31.6	49.1	23.7	13.2	17.3	500	13.9	30	15.4
71.7	50.9	5.73	130	8.74	13.3	28.4	478	1.23	18.8	114
66.1	47.4	6.49	26.9	34.6	8.98	31.9	453	1.3	13.8	79.9
52.8	14.6	25.7	178	41.8	6.21	10.8	255	16.8	36.8	17
123	27.4	10.8	13.7	42.6	5.05	15.3	939	13.9	25.7	9.31
47.4	22.5	1.91	229	23.1	11	27.4	573	13.2	40.3	17.8
21.5	18.1	7.3	34.9	15.7	9.47	14.2	644	3.55	16.3	33.1
42.2	13.5	13.8	68.5	31.9	4.78	34.6	422	28.6	42.6	20.2
9.65	16.1	12.4	21.7	1.47	13	35.2	470	24.1	43.7	23.1
28.9	21.5	8.74	15.8	35.5	3.46	21.9	355	17.8	44.1	11.8
93.9	44.5	12.1	10	4.29	25.3	32.2	396	3.19	26.4	99.1
69.8	20.9	4.53	5.67	4.41	25	39.6	319	16.5	40.7	75.7
41.8	14.6	8.2	15.7	16	8.74	11.9	382	15.7	35.5	4.78
12	21.3	11.3	74.3	13.8	7.91	20	939	30.2	48.7	5.67
31.1	23.9	21.9	19.1	10.1	13.2	20.7	505	6.79	17.3	13.8
62.1	30.2	17.8	15.4	6.55	8.13	22.1	457	10	17.6	8.13
14.9	16.8	12.5	31.6	12.7	17.8	28.1	276	18.1	35.9	19.1
34	23.3	13.2	202	23.3	21.9	30.2	319	18.1	22.7	1.46
69.2	19.3	12.6	12.4	12.1	11.1	23.9	615	1.75	7.5	10.2
50.9	20.7	9.73	150	17	4.29	14.5	164	14.9	18.1	9.73
38.9	27.1	3.19	15	8.35	10.8	22.7	685	15	35.5	13.1
88.2	24.4	1.78	87.4	11.8	25.9	47	392	13.7	17.3	7.64
107	54.2	63.8	235	115	18.1	34.3	382	16.3	19.5	8.82
54.7	27.4	6.38	15.8	25	58.3	98.2	1420	18.1	24.8	7.17
10.4	4.57	18.9	25.5	13.6	4.07	44.1	644	24.4	42.9	6.38
59.9	8.28	17.2	52.8	2.44	14.6	26.2	538	3.16	9.82	2.97
101	25.3	5.99	235	34.3	1.45	21.7	673	22.7	26.2	12.3
14.6	28.9	10.6	87.4	22.7	29.4	47	365	13.8	11.7	8.35
143	67.3	3.79	9.56	54.7	3.85	14.6	221	7.17	16.7	13.6
96.5	29.7	13.9	16	2.46	6.98	19.5	1055	10.7	11.1	3.89
103	89.8	5.09	4.74	7.37	9.91	24.8	557	21.3	38.5	14.6
36.5	17.9	1.04	343	30.2	10.4	39.6	1700	7.91	9.82	5.67
66.7	81.3	12.2	14.5	4.37	17.3	31.6	286	16	14.3	4.45
64.4	35.2	15.5	11.2	7.7	7.1	22.7	433	20.9	25.9	8.43
110	34	14.1	31.3	25.3	7.3	16.5	505	17.8	29.2	11.7
23.1	30.2	1.1	311	27.1	11.5	23.7	594	18.6	28.9	7.91
145	32.5	11.8	52.3	19.1	35.2	59.4	389	18.6	25.7	5.14
48.7	17.3	1.38	13.6	56.2	4.96	26.9	1263	11	15.7	8.9
18.8	13.3	7.23	89	23.9	8.74	18.1	692	4.14	19.5	94.7
64.4	31.1	7.91	246	51.4	22.1	37.2	385	21.5	28.9	17.9
35.2	19.1	19.8	53.8	77	22.1	32.8	334	16.7	28.1	5.47
29.7	22.9	13.6	45.7	13.9	18.8	35.2	552	18.3	31.3	6.79
52.8	14.2	13.6	11.2	7.91	6.98	24.6	422	2.19	9.14	67.3
34	17.8	19.1	16.1	6.73	6.21	13.1	667	12.3	5.99	3.43
42.9	14.5	69.2	186	32.8	4.87	23.3	382	13.2	25.7	3.22
33.4	27.4	10.1	61.5	13.1	10.8	24.1	573	3.37	4.14	8.9
111	38.2	10.5	12.6	9.82	36.8	64.9	1596	19.3	19.6	8.2
84.3	30.2	15.7	19.1	17	21.1	32.8	311	17.8	31.6	3.13
37.9	20.9	6.85	59.4	22.7	6.1	5.67	704	15.4	15.1	10.1
64.4	34.3	9.14	89.8	15.1	5.83	12.1	271	17	23.7	8.51
44.5	22.1	4.87	12.1	12	2.69	20.4	685	17.6	16.5	13.6
36.8	20.7	12.5	13.1	10.5	47.8	59.4	835	19.3	45.3	5.62
111	42.9	11.3	14.1	9.47	18.6	32.8	244	46.6	55.2	9.06
42.6	16.3	15	50.9	20	12.5	25	352	12.3	16.3	1.88
12.5	32.2	11.9	75	20.2	25.3	37.5	418	16.8	73.7	163
28.1	30.5	9.73	52.3	5.99	3.49	15.3	19.8	15.7	26.2	10.6
83.5	75	9.14	82	30	20	36.5	385	19.5	34.9	11.5
87.4	39.2	14.6	403	84.3	29.2	45.3	461	12.2	26.7	5
29.4	29.7	9.39	77.7	26.2	17.8	24.4	385	9.14	34.9	120
49.1	22.5	9.91	21.3	55.2	8.82	12.6	599	9.73	43.7	198
122	85.1	10	17.3	20.4	25	44.1	1420	2.81	11.8	59.4
28.1	17.8	10.3	21.1	35.5	17.8	29.2	835	3.31	12.5	2.23
19.3	17.3	20	34	8.9	12	24.6	523	15.7	24.6	20.7
3.65	10.9	14.2	67.3	33.7	4.18	16.8	23.3	2	7.7	48.7
25.5	1.25	16.3	15	8.2	16.8	29.4	292	15.5	18.9	3.52
31.3	22.7	4.83	12.6	11	21.1	31.6	289	25.9	41	17.5
16.7	5.38	1.01	11.8	20.4	16	25.3	274	19.5	21.1	13.8
71.7	19.5	10.6	28.6	28.4	23.9	38.5	316	15.5	26.4	6.15
37.5	10.3	11.7	51.9	15.8	5.05	26.4	53.8	5.88	8.51	6.67
3.46	1.47	9.06	36.2	71	5.28	20.4	284	16.7	34.3	10.3
34.9	21.3	9.22	178	7.7	38.9	64.4	1911	29.7	42.2	12.4
23.9	17.8	7.99	40.7	14.5	31.1	81.3	1762	15.7	12.9	5
26.4	29.2	15.3	10.6	6.55	10.9	24.8	426	11.3	28.9	17.2
17.3	15.8	12.7	18.9	5.94	4.57	14.5	1018	17.8	41	4.37
73.7	25.3	4.83	12.1	28.6	6.21	18.4	621	15.1	30.8	8.58
64.9	23.5	6.32	23.1	33.1	12.7	29.2	599	17.8	23.1	4.57
53.8	14.5	9.14	227	29.2	9.73	16	692	3	10.8	2.25
49.6	23.7	13.6	20.7	40	20.7	42.6	313	12.5	13.6	9.39
1.35	8.82	18.8	14.9	7.17	14.6	18.4	457	11	13.6	6.55
50.9	15.1	1.21	1.33	7.64	7.17	14.9	567	11.9	11.5	7.5
24.8	9.65	6.67	246	30.5	2.97	24.1	352	37.2	41.8	7.64
86.6	26.2	23.3	86.6	111	17.3	28.9	509	6.61	10.5	14.7
34.9	11.5	19.6	11.9	14.5	14.7	31.9	437	19.5	30.2	2.71
60.4	16.5	9.39	155	22.7	19.3	62.1	567	17	23.7	13.2
54.2	27.4	15	15	8.66	5.19	16.4	882	24.8	39.6	20.4
58.3	28.6	7.99	11.7	2.97	5.47	15.1	34	2.55	2.07	7.84
65.5	16.8	16.4	18.6	10.8	23.1	38.2	461	26.9	39.6	7.37
67.3	20.7	28.4	51.9	21.1	5.73	16.4	610	1	2.11	2.79
109	31.9	2.53	1.08	509	17.3	18.6	241	14.9	21.9	2.89
127	68.5	25.9	70.4	139	17.9	38.2	382	1	16.5	6.92
115	37.9	32.8	34	18.1	19.6	27.6	445	12.6	17.3	10.6
21.3	13.5	11.5	20	95.6	18.9	28.9	491	3	17.3	73.7
14.5	18.9	21.3	20.4	17.9	19.3	20.5	262	15.3	22.5	3.89
56.7	23.7	8.82	69.8	16.4	18.6	44.5	1310	8.82	13.9	7.1
26.4	19.6	23.1	11.4	6.85	13.1	21.3	547	13.2	13.7	8.35
9.39	6.04	6.26	5.83	3.75	20.5	35.5	396	14.2	16.1	8.28
13.1	17.2	16.1	12.4	13.2	8.2	27.6	533	5.94	39.6	95.6
63.2	28.1	17.2	21.3	5.28	19.6	34.6	661	52.3	163	57.8
48.3	23.3	5.19	75	21.7	17.8	28.6	673	15.7	34	3.82
31.6	16.7	7.43	250	23.5	12.2	25.3	496	10.1	13.6	9.91
31.9	24.6	13.7	24.8	13.5	6.15	15.8	621	22.7	31.1	7.43
41	17.5	8.66	46.1	35.9	3.96	13.9	418	21.1	38.5	12.9
16.8	17.8	17	21.1	6.04	3.92	12.9	562	8.82	10.6	36.2
44.5	12.5	3.25	379	69.8	17.5	37.9	372	5.33	9.65	1.63
1	10.7	15	15	18.8	31.1	45.3	461	38.5	60.4	183
19.6	5.67	1	99.1	12.3	13.8	42.9	1197	7.57	48.3	91.4
26.7	18.9	19.6	14.3	4.41	18.8	25	457	16.8	19.8	11.5
34	25	11.5	19.5	15.8	14.3	15.5	519	12.1	14.3	1.79
74.3	35.9	9.82	104	35.5	23.3	30.2	433	15.5	25.9	5.57
44.5	44.5	4.41	68.5	9.91	32.8	47.8	403	77	133	49.6
23.9	29.7	4.41	15.5	14.9	21.3	34	311	14.5	22.5	8.66
22.3	34.6	2.02	124	4.96	33.4	35.5	340	15.1	19.5	1.19
118	24.1	6.32	188	34	13.7	22.3	396	24.8	48.3	76.4
109	38.5	11.7	18.6	18.3	9.73	18.9	362	15.8	25.3	6.15
73.7	20.7	5.78	143	32.2	3.72	12.6	483	13.3	11.1	5.05
25.9	23.1	27.9	37.5	12.5	13.3	25.9	453	1.04	17.3	14.9
75.7	34.3	16.1	58.8	21.1	12.7	23.5	300	3.25	7.91	3.08
37.9	6.73	11	34	35.9	31.1	34.6	316	8.13	14.5	6.85
41.4	21.7	3.37	239	19.8	6.98	15.8	914	8.98	23.7	34
90.6	29.4	12.5	57.3	12.7	2.46	11.4	533	19.5	42.6	27.4
19.1	40.7	13.1	22.3	9.47	13	26.9	403	14.7	18.6	15.3
63.2	36.2	14.2	62.6	15	11.9	19.3	389	20	37.5	20.4
75	31.6	10.2	118	26.7	13.7	20.7	449	13.9	31.3	10.5
36.8	24.4	6.79	12.7	7.99	12.4	34	422	10.6	25.5	5
42.6	14.7	17.9	6.73	31.6	10.6	67.3	2571	1	63.8	4.1
41.4	34.3	5.83	241	22.3	7.5	7.5	685	2.86	1.33	5.94
20.2	17.8	6.32	111	42.9	4.1	16.3	375	5.88	29.2	145
13.2	9.14	4.91	2.71	1.29	12.3	24.4	474	15.3	16.5	7.64
18.3	11.3	8.2	221	35.9	264	528	5989	6.15	10.6	4.66
11.9	4.53	2.48	121	9.82	5.47	15	547	15.3	26.2	10.2
53.8	25.5	2.89	183	29.7	10.1	17	692	8.82	6.61	8.58
10	10.2	11.7	21.9	17.8	32.2	52.8	1176	49.6	121	32.8
58.3	32.8	12.2	1.38	27.9	26.4	50.9	784	46.1	88.2	18.8
94.7	50	6.85	10.2	31.6	33.7	38.9	276	8.9	23.9	1.68
27.4	21.5	7.04	6.38	74.3	5.73	15.3	610	16.4	13.3	3.31
37.2	15	15	11	9.22	21.3	31.3	255	8.9	14.2	13.7
153	107	11.4	75	8.66	15	63.2	2969	14.1	14.9	6.73
51.9	10.3	10.9	85.8	27.4	3.34	13.7	217	28.4	51.4	12.9
78.4	25.9	1	264	44.5	17.3	28.9	509	11.7	16.5	3.68
69.8	24.4	54.7	129	14.1	15.4	27.9	375	4.37	12.3	10.1
106	45.3	6.79	142	27.4	6.85	23.9	1252	29.4	28.1	9.06
204	75.7	24.6	49.1	105	24.6	51.9	1009	22.3	27.4	4.87
53.3	21.3	9.22	9.65	17	10.6	47	1625	10.7	14.3	5.28
44.9	22.1	12.1	41.8	14.6	9.47	21.1	429	25.7	39.2	14.3
38.2	16	29.7	31.1	30	12.4	18.6	621	12.4	19.8	8.51
8.2	9.91	6.26	13.8	9.14	26.4	30.5	389	17.5	17.6	5.23
93.9	46.1	3.43	8.2	55.7	10.5	18.1	461	11.3	13.3	12.7
32.8	18.4	6.49	24.4	4.61	22.3	36.8	322	20.2	34.3	3.05
80.6	40.7	22.7	10.3	8.06	13.8	56.2	2864	16	26.9	3.62
7.57	23.5	1.43	6.92	18.1	2.84	1.31	136	12.6	30.5	7.1
28.9	19.1	37.2	9.56	58.3	6.61	13.6	82	15.8	24.4	16.5
9.82	7.43	6.73	13.8	46.6	30.8	42.6	466	15.1	24.1	12
93.9	38.9	9.73	125	20.5	25.9	38.5	453	7.77	35.5	223
40.3	24.8	50	229	88.2	15	29.4	248	15.1	19.5	8.58
35.9	34.9	4.14	13.2	30	7.64	25	638	17.6	30	7.99
66.1	27.9	4.57	183	44.1	4.1	22.3	698	10.8	31.1	4.96
41.8	19.5	3.43	8.58	8.28	5.88	17	362	21.5	26.4	8.98
20.9	27.6	13.6	48.3	54.7	1	1.47	198	13.2	22.7	8.51
16.4	8.9	33.1	54.2	16.5	26.4	35.2	466	9.65	13.3	1.43
59.4	32.2	55.7	97.3	37.5	19.5	30.2	331	11.3	18.4	6.15
32.8	17.2	13	10.6	2.48	56.7	84.3	1685	26.7	49.6	31.1
44.9	20	8.43	155	16.4	12.3	27.9	359	23.1	41	17.8
81.3	16.7	7.04	141	33.7	7.99	11.8	730	37.2	58.8	17.2
136	71	15.1	17	4.78	16.8	31.6	396	20	40.7	12.5
23.5	16.3	3.19	1	445	10.6	18.3	389	28.1	46.1	17.9
57.8	15	37.5	40	18.8	29.4	30.5	322	10.6	34.9	22.3
40.7	16.1	16.5	12.5	3.02	17.6	31.9	843	61.5	85.1	25.5
45.7	15.4	8.98	124	22.1	4.18	8.66	661	11.7	17.5	8.43
6.73	20	10.4	143	25.3	32.2	38.2	478	26.7	47.4	19.1
125	123	14.1	10.4	4.96	16	16.4	514	19.3	21.1	4.14
85.1	33.4	12.4	50	20.2	10.6	19.6	898	16.7	34.3	1.35
186	165	22.9	26.4	4.83	8.74	16.5	538	36.2	30.5	12.3
52.3	38.9	3.75	18.3	26.2	7.77	12.4	313	16	34.9	58.8
96.5	30.2	14.1	23.5	13.7	28.6	48.3	1124	13.7	19.8	5.05
28.9	16.8	3.72	20.5	44.9	7.99	18.1	279	3.79	16.1	71.7
105	40.3	11.3	18.4	13.9	14.7	27.1	359	28.4	30.5	7.17
149	36.5	4.03	9.91	3.65	20.4	33.7	372	14.6	16.8	6.04
21.5	6.67	17.9	89.8	31.6	39.2	55.2	257	16.4	22.7	10.6
50.5	38.5	8.2	42.9	10.7	14.3	21.3	599	22.5	37.2	19.8
100	48.7	7.5	17	16.3	16.3	23.5	300	12.3	11.1	2.71
80.6	31.3	13.1	34.9	17	10.8	14.5	422	15	21.3	7.64
56.7	26.7	9.22	15.1	2.57	6.26	9.73	352	38.2	54.7	30.5
81.3	28.1	9.06	16.7	47	21.7	24.4	274	119	297	155
44.9	22.9	9.47	14.7	17.3	11.8	30.8	466	13.2	17.9	4.49
97.3	33.7	16.7	64.9	23.3	8.58	12.5	286	35.5	57.3	15.4
61	31.9	17.8	16.4	10.1	13.3	28.1	1911	1.79	9.73	3.4
64.4	33.1	20.2	578	82.8	7.77	18.9	368	1.84	17.8	76.4
120	40.7	7.57	898	123	16.8	28.4	319	11.1	24.1	10.8
20.7	6.61	16	16.4	9.47	3.62	21.3	874	17.5	22.5	5.05
31.1	15.1	66.7	63.8	16.4	26.7	34.3	400	12.7	16.1	10.8
25.5	28.1	5.23	7.17	42.2	64.9	104	1670	1	10.9	6.49
69.8	23.7	5.19	14.6	47.4	28.6	69.8	491	22.5	26.2	7.64
5	18.6	10.1	72.3	19.3	24.1	32.8	368	10.3	12	2.39
72.3	41.4	21.3	34.9	12.3	5	14.9	433	15.8	17.2	11
40.3	27.1	21.9	29.2	8.51	16.8	39.6	547	2.84	3.13	5.33
7.99	29.4	10.4	62.1	4.45	12.4	21.3	441	54.7	96.5	48.3
67.3	25	8.43	16	12.5	12	28.9	594	10	27.6	1.27
59.9	19.5	1	213	5.28	2.44	9.06	188	26.7	31.9	13.1
37.9	19.6	14.5	19.8	12.5	6.26	19.6	791	2.48	14.1	87.4
73	37.9	43.3	68.5	11.5	21.3	48.7	1104	8.43	20.9	1
75	28.6	33.4	57.8	15.3	25.5	40.7	407	13.3	20.2	5.67
33.1	21.9	4.29	87.4	24.8	2.59	23.7	1084	16.7	28.4	8.2
22.9	15.8	11.3	297	58.3	3.79	23.7	874	20.4	45.3	70.4
11.3	17.6	7.91	18.4	55.2	23.7	82	939	12.9	13	7.91
49.1	15	8.2	246	71.7	4.18	7.43	533	30.2	47.4	19.3
37.9	38.5	4.45	60.4	22.5	3.37	20.2	491	20.4	29.4	5.19
6.44	16.3	21.5	31.3	13.3	6.73	12.3	632	21.7	33.1	3.37
56.2	29.4	42.2	13.1	49.6	3.37	8.74	389	3.75	5.78	4.57
85.1	37.5	8.9	121	27.1	7.7	23.5	1114	22.5	42.9	2.81
89.8	83.5	11.5	15.5	11.2	17.9	28.6	422	12.5	15.4	6.1
74.3	32.2	14.2	15.3	11.4	13.3	30	500	2.76	6.49	11.9
30	23.7	16.4	55.7	49.1	15.8	20.5	552	13.5	21.5	1.54
106	25.5	6.85	34.3	35.2	6.38	29.4	931	9.56	17.9	7.99
61.5	23.1	12.1	33.4	28.6	15.3	30	340	41.8	59.4	30
85.8	20.5	135	422	250	22.3	46.1	1486	6.04	7.64	4.37
47.8	17.9	19.5	55.2	41.8	19.8	28.9	426	14.7	21.3	10.7
35.5	29.4	11.5	57.3	34.6	6.32	17	820	5	5.88	29.7
48.3	19.1	10.1	25.5	31.9	11.2	24.6	514	2.11	16.7	94.7
111	36.8	6.26	115	13.7	5.23	30.5	717	20	42.6	14.1
53.3	20.9	22.3	35.2	10.6	3.92	26.7	764	16	28.4	9.91
14.3	13.6	10.6	355	69.8	6.49	3.96	542	19.8	48.3	25
39.6	11.1	16	43.7	53.8	25.3	44.1	496	14.3	26.2	19.6
14.3	23.1	7.57	267	28.9	10	35.5	1433	19.3	34.6	9.82
126	45.7	8.82	90.6	15.8	6.38	26.9	828	7.84	17.9	1
31.9	17.3	12.4	20.4	5.42	7.91	9.82	770	12.7	17.2	6.67
56.2	30.2	16.4	16.4	16.4	5.33	13.9	610	1.88	1.05	5.62
131	85.1	1.54	126	11.8	5	16.4	514	20	27.1	8.2
34.9	10.8	15.7	16.3	3.4	13.3	26.2	1009	21.5	42.6	9.31
30.5	12.9	9.73	96.5	12	1.96	4.66	76.4	1	66.1	3.52
8.66	20.9	9.73	14.7	35.5	10	16.1	528	2.64	42.9	75.7
46.1	16.1	2.39	16.8	45.3	19.3	38.2	723	15.1	28.4	8.98
59.4	33.1	14.2	10.4	9.31	12	27.9	276	17.6	7.84	2.79
93.1	22.3	5.73	47.8	10.1	12.5	24.1	334	10.5	17.9	8.82
38.5	22.5	5.78	74.3	23.3	10.6	13	835	15.8	23.3	7.57
99.1	43.7	1	161	23.3	7.64	17.9	578	5.14	17.3	21.3
76.4	22.7	10.1	71.7	24.4	38.5	88.2	500	20.9	24.1	13.2
106	66.7	9.65	12.1	31.9	23.5	31.9	449	4.53	15.3	14.3
112	28.1	10.8	28.6	15.8	21.1	35.5	410	23.9	35.2	9.73
105	58.3	68.5	215	20.7	2.5	30	820	9.14	13.9	1.83
94.7	26.2	7.91	118	27.9	12.5	24.6	523	9.06	10	1.7
87.4	153	9.91	42.9	6.73	23.5	31.1	334	12.7	20.2	12.5
120	41	15	57.8	24.6	20.9	32.8	379	1	18.9	97.3
52.3	25	9.82	119	16.3	24.4	92.2	1582	2.41	12.4	58.3
19.5	26.4	7.5	21.5	93.9	3.46	13.7	882	22.5	41.8	13
92.2	28.9	9.06	3.46	23.3	15.3	31.1	429	10.8	9.39	1.95
133	52.8	4.41	93.1	31.6	2.27	11.3	956	18.1	25	6.1
31.6	16.7	12.2	17.5	14.9	6.73	21.3	806	7.77	9.82	12.4
57.8	19.6	13.5	33.4	6.61	44.9	79.1	931	15.8	21.7	13.7
70.4	25.5	3.31	11.7	5.78	20.2	25.9	284	30.8	59.4	12.6
66.7	23.5	1	124	14.9	11.5	17.2	461	37.5	59.4	21.3
31.6	12.4	30.5	53.3	15.7	17.5	35.5	331	23.7	36.5	9.65
86.6	24.1	4.57	15.8	18.8	30.8	56.2	737	11.4	17.8	3.72
118	31.9	15.7	15.5	26.4	4	16.8	632	9.91	11.1	7.3
61.5	16.8	5.23	105	22.9	5.73	27.6	396	25	25.9	5.94
34.9	16.1	11.8	46.6	20.5	16.8	15.4	343	14.3	22.5	9.14
28.6	17.5	7.57	94.7	6.85	20.9	72.3	115	6.04	52.3	67.9
25.5	12.4	23.1	38.5	15.5	25.5	36.5	426	13	20.2	13.2
31.3	28.6	13.3	7.23	1.12	2.17	9.65	262	12.2	2.89	4.74
115	39.2	7.5	66.1	11.2	22.7	27.6	250	36.2	57.8	16.5
76.4	41.4	18.4	281	68.5	9.22	21.5	667	16.4	29.4	14.2
99.1	28.6	8.9	186	10.6	19.3	32.8	737	25.5	26.9	7.57
74.3	21.1	3.46	10.1	25	13.7	16.7	487	10.3	12.3	10.6
93.1	31.1	10.6	137	23.5	16.3	25.7	422	9.65	23.1	5.14
10.1	22.3	21.3	35.5	15.5	4.53	9.31	359	13	27.1	17
27.6	39.2	10.5	12.3	3.52	7.84	17.3	730	5.28	34	142
12.6	20.5	10.8	227	28.9	13	25.5	514	14.6	20.2	19.3
100	28.4	27.1	215	67.3	26.2	30.8	331	25.7	37.5	10.6
23.7	23.9	1	407	43.3	5.78	17.6	1459	11.9	20.7	3.65
75	24.8	9.91	16.5	88.2	15.8	31.1	429	1.72	2.64	2.71
54.7	46.6	17.9	24.1	17	25	33.4	337	18.3	27.6	6.49
52.8	28.6	5.83	92.2	17.6	8.2	13.6	685	18.3	24.6	11.8
73	20.5	16.5	8.98	5.78	14.9	34.3	271	3.49	2.35	7.5
27.9	17.5	5.62	10.5	36.8	33.1	44.5	632	16.3	26.4	13
89	77.7	14.9	25.3	34.6	11.8	22.9	441	1	8.51	9.65
11.2	1.83	15.1	24.8	61	4.57	20.4	638	15.8	19.8	6.85
112	32.8	18.4	30.5	7.64	8.35	12.3	441	17.6	21.1	4.07
28.9	20.4	18.3	25.3	11.8	5.14	20.5	23.1	20	26.9	14.6
12.7	13.7	18.6	55.2	23.5	9.22	15	649	16.3	17.8	5.28
59.9	24.6	14.5	67.3	21.5	29.4	48.3	466	18.9	24.8	1.81
29.4	16.7	5.09	26.7	49.1	5.23	28.1	723	5.23	10	39.6
47.4	33.4	12.7	289	59.4	12.9	31.6	523	6.55	11.1	22.1
13.6	8.74	13	39.2	25	18.4	30.2	379	15.7	37.9	8.74
106	108	4.66	10.9	21.9	10.6	22.9	396	32.8	48.7	20.2
39.6	13.2	9.14	66.1	5.47	12.4	25.7	496	18.8	28.6	8.74
88.2	54.7	5.47	15.8	4.03	10.5	29.4	649	3.43	22.7	61.5
29.4	16.1	10.3	21.1	2.89	10.6	20.5	449	4.14	7.17	4.7
72.3	48.3	14.6	103	24.4	26.7	40.3	396	17.6	23.3	2.81
36.8	13.7	10.9	170	18.1	16.1	39.6	457	20.5	25.5	6.32
109	45.3	13.7	16.5	11.1	11.5	22.3	528	3.13	7.64	27.4
27.4	19.8	25.5	528	93.1	20.9	37.5	385	3.55	16	106
25.9	30.2	6.67	289	13.6	9.31	20.2	583	19.6	34.3	12.9
16	7.77	1	239	30.2	11.7	20.4	562	1.36	1.27	1.06
118	56.7	13.2	24.8	38.2	58.8	85.1	799	13.7	20.7	8.43
36.5	18.1	9.06	120	32.8	3.37	24.6	154	13.7	19.3	6.1
35.5	14.6	8.06	10.4	14.5	24.4	32.8	352	19.8	34	12.2
34.3	16.8	14.5	17.3	12.3	54.2	135	2813	11.8	30.2	139
13.8	19.3	15.4	85.8	19.1	20.7	53.3	717	3.68	22.1	67.9
66.1	22.3	4.49	161	33.4	34	53.3	343	16.1	39.6	18.8
32.2	14.9	14.6	10.7	8.82	14.1	26.2	328	12.9	21.1	5.57
8.74	19.8	8.43	56.2	29.7	15.3	19.1	429	37.9	67.9	27.6
103	23.9	9.22	173	470	15.8	34.3	235	18.9	41.4	12.7
98.2	33.4	10	18.4	21.1	10.3	15.8	615	1	31.1	2.19
25	14.6	36.8	43.3	13.9	12.5	16	567	14.3	17.6	6.67
110	36.8	32.8	44.9	7.04	8.28	17.6	129	9.06	8.06	5.14
58.3	18.8	13.5	27.9	12.2	13.1	25.3	1877	31.6	47.4	13.8
20.9	8.2	13.8	15	8.58	18.9	31.9	346	16.5	19.3	1.43
105	58.8	12.1	41	44.1	11.1	26.2	552	13	25.3	5.42
64.9	29.4	17.8	109	34.3	4.33	9.73	379	15.1	13.6	2.84
88.2	25	46.1	62.1	8.82	6.79	12.9	851	15.3	26.2	7.17
69.2	18.1	5.14	121	24.4	8.58	37.2	186	20	23.3	14.7
51.9	28.6	13.9	16.3	7.77	30.2	58.8	1715	21.5	28.1	3
28.4	20.4	16.1	12.4	2.35	5.52	17	316	18.6	27.1	5.99
45.3	21.5	15.4	115	29.4	3.96	60.4	757	8.06	13.7	21.3
157	73.7	10.9	16	40.7	10.7	18.4	334	23.1	34	6.32
31.6	24.6	13.7	9.82	7.99	2.37	7.04	117	28.1	40.3	14.5
139	37.5	54.2	80.6	20.5	8.74	25.3	379	11.1	17.2	6.1
56.7	33.7	3.22	141	38.9	5.52	26.2	514	1.42	90.6	8.43
79.9	31.9	15	24.6	20.9	23.5	85.8	973	8.28	20.4	1
49.6	11.1	9.39	14.9	1	2.29	7.84	552	19.3	36.2	14.7
79.1	30.8	5.73	120	25.7	37.2	48.3	649	11.2	13.7	4.91
36.5	21.7	42.6	71.7	12.6	11.1	22.7	375	15.7	29.4	11.1
50	13	2.55	11	37.5	3.16	10	176	18.3	31.1	9.65
20.7	33.7	15.4	15.3	12.7	32.8	50	470	10.5	14.7	3.75
58.8	22.5	15.5	23.3	17.5	4.87	6.26	274	15.3	23.9	4.66
52.3	14.6	6.67	82	8.13	8.13	19.8	533	4.22	13.9	14.9
86.6	29.7	11.9	65.5	12.3	27.4	47.4	227	11.7	21.1	2.33
91.4	55.2	8.2	21.7	11.7	19.1	34	418	11.9	15.5	9.47
32.5	14.5	11.9	16.5	48.3	22.1	38.9	343	3.28	27.9	87.4
57.8	32.5	13	93.9	23.1	4.53	32.2	2247	28.9	26.2	1
65.5	19.8	9.31	22.3	22.7	20.4	45.3	939	12	21.7	5.33
64.9	22.9	13.2	31.9	4.14	13.7	44.5	1298	11.4	25.9	12.4
5.67	17.8	19.6	20.5	7.1	14.5	25.9	717	21.9	34.9	8.06
57.8	32.5	8.9	12.2	6.04	6.92	36.8	62.6	7.5	12.7	5.99
189	153	13.6	21.1	5.94	21.9	29.7	253	18.1	27.6	6.32
31.9	26.9	23.7	51.4	22.7	6.61	10.9	573	29.4	42.6	13.1
30	11	7.5	14.9	16	26.4	41.8	685	19.3	33.7	9.06
16.4	13.9	4.57	138	24.4	11.8	35.2	1322	16	18.4	9.82
46.6	18.3	33.7	65.5	4.87	21.1	35.2	429	15	37.5	21.7
27.6	21.1	22.3	20.7	31.9	6.1	28.4	679	9.39	50	98.2
62.6	18.4	7.57	23.3	7.77	6.15	9.82	255	1.18	24.8	1.46
92.2	47	18.9	16.5	4.78	1.08	4.74	25.3	7.04	43.7	106
50.9	30.2	1.43	340	55.7	10.6	19.1	340	37.5	69.2	17
53.8	14.7	31.9	46.1	13.6	21.9	51.4	914	10.4	20.2	7.3
102	30.8	9.06	95.6	18.6	4.18	17.2	621	5.99	15.5	4.87
72.3	39.2	21.1	14.6	20.4	6.55	12.2	478	14.1	20.7	10.6
86.6	31.1	27.9	98.2	37.2	13.8	18.4	149	15.4	21.5	8.66
110	35.2	56.2	111	34.9	7.04	15.8	407	14.7	5.33	7.99
42.6	24.1	6.1	20.4	49.6	4.66	13.3	466	14.7	14.1	1.65
9.91	25.5	12.3	23.9	47	20.7	30	396	6.73	18.6	47.8
106	54.2	7.23	16.5	63.2	3.52	4.26	379	18.6	27.4	5.52
34.9	17.2	12.4	32.8	15	13.6	21.7	594	10.3	16	2.84
4.22	7.57	1.67	437	73	6.04	13.2	375	8.9	20.2	4.37
54.2	24.4	31.9	38.5	8.82	4	8.58	122	17.5	22.9	3.55
36.5	14.5	6.49	53.8	19.8	5.19	9.39	253	9.65	8.9	3.75
75.7	18.9	39.2	34	9.82	6.92	20.4	429	12.5	17	4.45
29.4	22.3	5.99	92.2	14.3	17.5	33.7	355	20.2	18.1	2.09
49.6	16.1	17.9	21.9	13.1	7.5	37.5	698	14.2	24.6	7.99
4.74	18.9	5.88	183	33.7	19.3	30.2	375	21.5	28.6	13.5
56.2	37.2	12.1	75.7	31.1	16.8	36.5	375	13.3	7.64	4.83
85.1	28.6	1	164	2.64	11	19.6	375	5.88	4.74	3.68
14.2	15.4	12.4	14.1	10.2	2.62	11.5	385	18.6	36.2	18.8
120	57.3	11.4	39.2	58.8	20.2	22.3	325	13.8	35.5	93.9
46.6	20.7	19.1	26.2	16.3	21.1	32.8	407	63.2	88.2	27.4
29.7	20.7	12.1	253	43.7	9.31	19.3	1155	13.2	26.2	10.8
79.9	26.2	2.92	45.3	6.92	10.6	25.9	519	20.4	27.9	4.87
15.7	29.7	42.6	83.5	51.9	18.6	77	4914	16.7	27.6	13.6
149	110	23.9	79.9	82	7.64	30.8	1382	15.8	25	9.56
85.8	23.9	27.6	34.3	17	19.5	27.6	305	13.5	16.5	10.4
52.3	37.2	17.6	33.7	15.5	6.21	23.1	956	13.8	17.9	7.64
160	157	16.7	153	25.3	25.7	32.5	313	23.3	28.1	3.82
99.1	19.6	8.82	17.9	40	22.9	40.7	429	13	15	1
31.3	19.1	8.51	22.1	17.9	17.8	33.7	355	10.7	18.6	6.79
14.3	22.1	18.4	11.4	1.68	22.5	39.2	426	8.9	17.3	3.19
88.2	52.8	9.47	14.6	8.28	34.9	56.7	400	20.9	38.9	14.2
38.9	20.2	15.7	16.3	1.29	9.14	75.7	1433	33.1	50.9	8.98
175	49.1	7.84	7.77	26.2	17.3	34	313	14.2	14.6	2.97
125	61	23.1	41.4	10.5	8.98	61	874	13.9	15.7	2.97
26.4	13.7	16.7	98.2	21.3	11.5	30.8	470	4.1	36.5	147
54.2	22.3	9.47	149	14.3	13.5	22.9	956	2.48	3	3.62
13.2	6.79	6.21	149	27.6	32.8	50.9	418	25.3	26.9	10
20	23.1	5.62	125	42.2	44.5	89	1860	5.19	14.3	3.43
32.8	20.9	9.65	58.8	11.5	11.7	18.6	552	12.7	17.3	11.4
30.5	48.3	10.5	54.2	16	14.7	32.8	491	16.8	19.3	9.31
75.7	28.6	3.28	10.7	7.3	20.9	34.9	328	13.9	28.6	6.67
50.5	20	13.3	179	27.9	10.5	28.1	1165	1	15.8	1
34.9	20.4	15.3	20.7	14.7	32.5	57.8	1055	16.4	21.1	6.98
30.8	12.3	14.6	13.8	2.11	4.37	18.6	368	2.97	1	2.27
56.2	27.4	8.98	141	31.3	10.7	21.1	505	13.6	15.5	5.05
16.3	9.31	17.6	25.3	62.1	10.3	33.7	441	1.32	5.78	6.85
18.9	5.94	11.5	172	25.7	2.07	13.8	528	7.57	11.2	12
49.1	9.91	13.8	23.3	44.5	8.13	46.6	259	22.3	39.6	25.9
20.4	15	2.17	257	20.4	4.53	8.82	31.9	10.7	11.5	13.3
23.9	33.7	23.7	17.9	11.1	9.06	16	567	13.9	15.5	7.64
71	22.3	18.9	20.7	10	28.4	36.8	858	10.2	5.67	5.38
27.4	24.1	10	21.5	17.5	12.1	27.1	599	19.6	36.8	8.35
25.3	28.4	13	16.3	38.5	6.1	16.8	655	6.04	20	121
12.6	26.2	11.1	63.8	28.4	11.4	62.6	457	18.6	94.7	514
165	37.5	16.7	72.3	27.1	14.1	20.2	244	15.3	15.1	1.89
64.4	26.9	34.3	36.2	30.5	5.33	57.3	1000	16.7	28.6	16
36.8	8.35	5	131	20.7	6.44	38.9	791	21.3	27.6	7.43
84.3	48.3	1	294	21.3	33.4	52.3	453	22.7	24.4	7.64
8.66	22.5	8.74	31.6	46.6	13.9	25	626	29.4	34	1.93
7.57	4.91	8.58	18.8	117	10.7	17.3	470	14.3	21.3	17.5
30.5	37.5	4.33	16.5	23.9	4.37	14.9	250	3.25	1.17	6.49
7.91	21.7	7.99	165	46.1	22.5	36.8	437	20.2	20.9	8.43
7.17	16.3	2.79	11.5	11.5	20	27.9	466	31.3	71	24.6
106	34.3	1	209	31.6	9.47	15.5	422	9.39	10.8	10.2
