# Supplementary material
Source: ML conference proceedings conference paper supplement (https://openreview.net/forum?id=nrbR2F29vU)
Supplement: supplementary_material [file 8. pma.xls]

## Sheet: Sheet1
praf	pmek	plcg	pip2	pip3	p44/42	pakts473	PKA	PKC	P38	pjnk
23.5	13.6	40.7	372	37.9	4.96	14.1	851	9.14	30	85.8
16.5	14.7	14.9	79.9	37.9	2.76	6.98	213	1.81	8.43	51.4
17.8	18.9	15.3	396	48.7	25	52.3	750	16.3	49.1	75.7
5.88	8.51	28.9	26.2	7.3	73	112	1219	1	20.7	47.4
17.3	18.9	14.6	19.1	5.14	16.5	32.2	710	1	1	30.2
47.4	40	20.9	21.7	15.8	81.3	121	1877	7.3	28.1	93.1
10.6	12.7	11	124	22.5	11.5	37.5	770	6.73	27.1	60.4
10.3	15	37.2	34.9	14.6	89	133	407	15.1	46.1	85.1
13.7	16.5	4.83	18.4	1.22	21.9	27.4	610	2.05	19.1	75.7
25.5	17.9	22.3	17.2	17.5	13.7	23.1	604	31.3	45.7	72.3
13.2	15.7	60.4	389	59.9	26.2	41.4	359	1	2.41	37.9
63.8	50.9	32.5	23.9	4.03	151	248	3619	15	33.4	41.8
17	16.8	22.5	22.3	12.5	12	22.5	547	17.6	24.6	36.5
49.6	71	23.9	13	10	113	204	3308	15.3	67.9	340
20.4	18.6	54.2	322	54.7	51.4	75.7	235	20.2	37.9	45.7
14.5	13	26.4	18.1	9.31	41	75.7	638	1	2.21	42.6
36.8	22.9	5.73	1	15.4	36.2	62.1	1794	17.6	33.7	41.8
14.9	34.3	20.7	18.8	8.82	106	163	2642	31.9	95.6	113
102	81.3	6.1	26.4	23.9	123	217	1843	3.85	5.78	44.9
16.4	25.7	59.9	71.7	16.5	183	257	1811	4.41	31.6	81.3
22.9	15	3.72	1.01	9.73	89	126	368	1.95	5.88	21.3
80.6	86.6	64.9	294	27.1	47	61	491	23.1	38.2	52.8
9.31	6.44	22.7	16.7	18.8	123	202	3220	1.14	3.28	46.1
14.2	10	86.6	466	93.9	37.9	54.2	445	42.6	90.6	400
19.3	13.8	21.3	30.8	15.5	4.7	42.9	538	14.1	31.9	48.3
33.4	19.6	14.2	19.3	12.7	158	213	334	17.8	31.3	34.9
38.5	27.1	34	31.6	3.62	114	202	2017	33.4	77.7	167
59.4	75	22.7	29.2	3.75	32.2	42.6	615	3.37	17.6	80.6
15.3	16.7	12.2	239	28.1	5.33	7.99	328	14.6	22.7	8.06
21.7	32.5	20.7	34.3	5.57	97.3	175	2642	30.8	55.2	76.4
30	14.9	22.3	35.5	2.46	137	316	5829	1	14.1	13.2
31.6	13	26.4	37.2	1	23.1	35.2	1275	6.38	5.33	50.5
18.8	11.1	71	466	64.4	20	39.6	615	14.9	44.5	110
7.64	28.1	6.79	18.1	7.77	47	64.4	1104	23.7	45.7	44.9
40.7	59.9	1.86	4.41	3.19	29.2	43.3	644	25.7	40	53.8
21.9	28.1	84.3	403	76.4	125	186	1568	4.1	9.47	30.5
51.4	22.1	94.7	117	17.6	76.4	102	947	8.58	25.7	129
30.5	15.5	53.3	142	19.1	77.7	151	2738	94.7	179	328
8.9	13.3	74.3	359	54.2	7.77	21.7	519	10.6	7.37	43.3
37.2	19.1	11.8	19.8	7.17	8.9	17	588	1	1	44.5
13.8	9.56	16.7	146	19.3	175	223	661	10.4	42.2	70.4
11.1	25	85.1	552	93.9	20.9	35.9	331	18.3	22.5	32.2
17.2	6.79	28.9	29.2	11.1	11.4	30.8	552	3.75	4.33	44.9
61.5	93.1	17	21.1	1.01	4.26	15.1	599	23.9	38.5	106
17.2	13.7	57.3	97.3	31.3	37.5	66.7	2329	8.74	2.33	35.2
16.8	46.1	18.6	63.2	11.8	18.9	31.9	649	8.2	23.5	50.9
12.1	10.5	21.3	18.9	4.26	176	483	8354	15.1	9.06	53.8
17.3	26.4	82.8	414	106	40	64.9	1018	13	20.9	27.6
21.5	22.3	73	519	87.4	3.72	12.3	851	1.31	33.1	10.9
25.7	15.8	34.3	37.5	2.89	5.23	20.2	422	1	64.4	8.28
13.1	11.7	21.7	132	42.2	36.5	49.1	542	1.08	5.88	13.2
44.1	29.2	39.6	119	63.2	36.8	47.8	365	3.52	6.79	30.2
38.2	14.2	7.1	28.1	8.98	172	233	1075	8.58	25.7	57.3
32.2	35.2	35.9	276	61	44.9	62.6	418	8.43	32.8	77
34.6	18.8	54.2	313	54.7	16.1	34.3	704	1	13.7	8.06
4.96	12.6	47.8	57.8	19.6	3.43	19.1	655	19.5	42.9	62.6
28.4	31.9	59.4	257	57.3	6.26	17.2	382	10.5	18.9	57.3
69.8	50	20.7	19.5	12.3	59.4	104	337	34.3	72.3	139
32.2	21.3	104	519	87.4	45.7	61.5	1286	22.1	34.3	42.6
30	32.5	17	22.1	7.5	49.6	86.6	1124	23.1	40	47
40.7	19.5	1.26	1.07	1.55	77.7	81.3	279	7.7	13	64.9
22.1	17.2	33.1	14.6	17	26.9	27.4	433	25.5	62.6	231
23.3	12	55.2	262	64.9	12.3	59.9	3023	17	27.1	50.5
24.6	19.5	20.9	17.2	13.1	3.85	14.5	1208	11.4	15.7	77
73	93.9	27.9	29.7	1.01	89	132	1762	11.9	28.4	12.1
23.1	10.7	17.8	80.6	3.68	22.3	30.8	483	8.66	28.4	48.3
20.7	12.7	20.9	25.5	9.82	17.9	25	632	3.85	7.99	46.1
14.1	9.31	18.3	3.37	29.4	112	161	939	8.51	16.3	46.1
16.1	6.26	20.2	17.3	8.82	75	125	1894	19.1	37.5	63.8
22.1	15.8	21.3	32.2	8.98	3.85	22.3	328	1.47	7.23	48.7
44.9	45.7	16.1	16.8	10.3	29.2	94.7	1715	32.8	66.7	137
62.6	52.3	35.9	233	49.1	167	271	2207	6.85	12.2	44.1
45.3	62.6	21.3	17.5	15.7	65.5	95.6	1433	13	26.4	36.2
19.5	20.2	24.8	30.2	10.4	19.6	43.3	573	2.69	4.57	7.77
17.8	16.3	14.3	85.8	17	20.5	33.1	922	43.7	62.1	62.1
14.2	13.9	18.9	19.5	8.43	66.1	154	2329	18.6	40.7	68.5
77	43.3	53.3	284	60.4	56.2	110	1762	22.1	24.8	81.3
6.44	18.3	15.7	41.4	13.1	44.1	56.2	750	35.5	59.4	76.4
14.3	18.4	5.05	1.75	8.13	31.1	58.8	407	18.8	47	48.7
30.2	54.7	40	211	41.4	14.9	32.5	588	5.99	15	45.3
13.5	21.9	35.5	40.7	7.91	44.9	103	3460	1.18	18.6	58.3
93.9	52.3	30.8	31.3	14.6	74.3	137	1794	9.39	24.6	92.2
24.6	9.65	37.5	40.3	18.1	35.5	130	2763	36.8	49.6	59.9
19.8	11.7	23.5	16.7	15.1	3.37	19.3	470	13.7	31.1	56.7
30.2	19.8	24.4	19.8	1	50	72.3	673	37.2	62.1	91.4
18.1	23.7	7.77	41.8	26.2	42.9	54.2	538	10.6	47	81.3
13.8	13.2	32.5	46.6	15	104	172	1747	20.4	30.8	63.2
19.1	14.6	22.9	32.8	11.4	78.4	127	1596	13.6	29.4	30
20	16.3	26.7	176	10	106	168	2571	9.39	8.28	13.9
23.1	11.5	14.5	42.6	103	119	204	2480	58.3	67.3	13.2
25.3	28.6	18.3	61.5	16.4	18.4	24.1	717	6.73	66.1	132
25	20.5	31.1	445	55.2	40	57.8	359	11.8	20.4	55.7
17	7.04	21.7	24.4	8.66	33.1	44.1	750	13.5	37.9	37.9
29.7	22.3	20	17.2	1.38	121	219	1999	7.37	22.5	37.5
22.5	17.5	23.9	77.7	17.5	35.2	56.2	340	4.37	26.7	47.4
61	33.1	37.9	311	48.7	137	352	4698	47	85.8	157
17.3	10.1	28.1	27.9	3.28	44.9	66.1	403	7.17	23.7	42.9
129	109	41.8	161	48.7	5.09	15.1	644	16.3	39.2	88.2
21.3	16.4	21.1	22.5	16.5	3.46	25.3	578	7.17	36.2	48.3
91.4	41.4	24.8	319	38.9	17.9	30.5	956	18.6	34.3	79.1
14.7	22.3	27.6	35.9	13.5	9.39	20.5	382	1	12.9	13.8
19.3	10.1	5.38	4.1	2.25	7.77	17	982	9.22	24.8	49.6
28.4	21.7	38.2	170	37.2	29.7	39.6	692	9.22	17.5	69.2
72.3	76.4	17.9	15.5	16.1	63.2	109	947	25	82.8	205
6.55	10.2	16.8	22.9	1	82.8	113	679	14.5	20.7	59.9
12.5	5.23	69.8	131	50	21.7	31.3	414	10.2	74.3	3.59
32.8	18.3	23.5	23.1	3.31	53.8	85.1	610	10.5	35.5	53.3
19.1	10.3	20.5	78.4	18.1	26.2	35.2	505	6.15	17.9	54.7
24.6	11.8	30	30.8	14.6	32.8	48.3	362	3.19	3.19	50.9
16.8	13.6	75.7	123	46.1	6.44	37.9	1000	12.2	20.5	18.3
7.17	17	23.7	23.3	5.33	25.7	41	491	14.7	28.6	54.7
19.1	13.9	15.8	74.3	21.9	24.1	34.3	474	9.39	27.6	39.6
20.5	20.9	17.3	120	15.3	11.7	24.1	644	9.06	16.1	50.9
18.4	19.8	12.7	81.3	11.3	6.21	44.1	496	84.3	119	41
20.9	8.82	20.7	300	31.3	19.5	37.2	542	18.6	29.2	49.1
14.9	15	17.6	170	24.1	22.7	32.2	453	18.6	31.1	79.9
16.1	14.3	8.9	42.9	21.1	17	30.2	698	9.91	21.1	38.5
12.3	13.8	4.07	1.01	1.65	26.4	37.5	784	1.2	28.1	27.1
26.9	20.2	19.5	170	23.3	8.51	15.4	487	32.5	67.3	118
131	95.6	12.3	189	16.5	36.8	62.1	1084	22.1	33.7	69.8
62.1	71	8.9	4.45	9.56	4.41	17.3	655	60.4	146	209
30	10.3	26.7	22.1	15.4	11.3	21.1	552	5.42	13	34.3
52.8	39.2	17.2	161	19.5	4.83	20	410	8.66	19.3	29.7
75	52.8	42.2	259	39.6	20.4	41.4	692	17.8	58.3	60.4
32.2	14.3	25.3	24.4	3.85	9.56	29.2	1275	14.3	21.7	38.9
18.3	19.8	14.3	18.6	1.88	1.76	1.01	93.9	11.1	26.2	41.8
13.7	25.3	14.6	147	13.9	18.8	46.6	777	57.3	131	181
27.6	18.1	35.5	340	26.9	17.9	30	379	7.7	39.6	42.9
17	10.9	22.7	67.3	13.5	34	47.4	626	26.4	24.1	85.8
26.4	37.2	41.4	183	33.7	103	175	1395	15.7	29.7	59.9
19.8	20.4	21.9	25.5	2.59	67.9	104	407	1.35	28.1	47.8
7.23	38.9	90.6	418	73	26.9	36.8	262	7.37	16.7	35.5
145	88.2	21.3	30.8	12.9	158	264	3460	15	28.4	49.6
34.9	20.4	58.8	474	69.8	34.9	43.7	407	13	29.4	30.2
31.3	19.1	20.7	110	27.1	41	83.5	813	25.7	39.2	58.8
19.5	16.3	25.5	19.3	2.71	26.2	31.6	644	18.6	42.2	49.6
19.5	15.1	14.5	13.6	3.62	13.2	29.4	519	35.2	69.8	48.3
20.9	20.2	1	92.2	14.5	52.8	76.4	1186	17.9	23.5	48.3
22.1	11.8	8.58	10.1	11.9	22.7	33.7	491	20.5	16.1	53.3
25.7	11.4	21.7	19.5	4.78	4.1	25.5	340	10.6	13.6	50
30.8	20	36.5	48.7	4.45	43.7	66.7	1084	31.3	67.9	225
53.3	44.5	13.9	99.1	5.94	14.2	36.2	673	1	18.3	48.3
16.5	12.4	27.6	26.2	1	4.18	19.3	791	17.6	28.1	54.2
17.8	17	26.7	15.5	4.7	21.5	38.9	1065	5.73	30.5	12.3
73.7	39.6	25.7	30.5	17.2	54.7	81.3	604	31.6	55.2	111
95.6	65.5	158	392	93.1	17.2	36.5	514	57.3	133	188
56.7	50.5	17.9	209	16.7	3.25	27.1	264	10.5	15.1	56.2
32.8	6.85	47.4	368	59.4	36.8	54.7	626	23.1	30	63.2
24.6	33.4	10.6	64.4	12.5	9.22	45.7	730	10	25.3	30
24.6	17.5	27.9	18.1	19.1	14.9	26.9	496	40	55.2	85.1
27.9	9.91	117	514	73	57.8	90.6	1176	14.3	31.1	39.2
34.3	15.8	7.23	1.41	3.68	2.64	14.3	429	21.5	48.7	28.1
23.9	20.2	63.8	385	69.2	6.67	14.6	604	13.6	32.5	51.4
17.3	7.3	17.6	16	11.3	1.54	7.04	63.8	10.5	14.2	40.7
20.7	11.9	77.7	294	79.9	6.61	19.5	478	9.82	24.6	109
27.6	19.5	41.8	101	18.1	14.5	24.6	533	6.61	26.2	48.7
11.1	6.73	15.8	19.8	8.82	5.57	32.5	621	16.3	26.2	62.6
17.8	13.3	22.9	13.1	3.34	102	172	3338	6.73	27.1	54.2
13.6	13.9	24.4	23.1	9.31	41.8	61.5	704	13.9	28.9	37.2
6.32	12.3	22.5	27.4	7.3	4.87	16.8	368	21.7	28.6	68.5
15	20.7	25	24.6	5.88	106	176	3023	12.1	18.6	35.2
27.1	12.5	20.9	131	19.6	54.7	83.5	1075	22.3	36.5	118
11.2	7.17	20.2	20.7	8.51	31.1	44.9	470	18.8	50.9	89
31.1	38.5	20	20.9	3.55	4.33	21.7	562	13.8	43.3	77.7
77.7	154	25.3	20.9	1.14	8.28	34.9	931	17.3	43.7	58.3
18.8	23.7	37.9	42.2	12.7	32.5	38.5	449	4.53	6.61	7.23
21.1	21.5	21.7	26.4	3.05	23.7	37.5	349	47	124	31.6
28.6	18.8	14.5	17.9	8.66	30.5	43.7	422	11.8	40	52.8
59.9	44.9	25.9	155	48.3	13.3	23.7	478	15.4	44.1	46.1
17.9	5.88	19.3	14.6	8.2	13.9	26.2	610	20.5	21.1	44.5
45.7	26.9	65.5	250	49.1	21.1	44.5	638	15.1	21.1	53.3
38.5	21.5	21.9	23.1	5	26.7	44.1	500	14.2	33.1	52.3
81.3	77.7	31.3	21.3	8.82	20	35.5	466	8.82	25	42.6
12.1	7.57	18.9	22.3	8.2	5.14	22.1	626	3.85	16	26.9
167	101	93.1	470	68.5	67.9	117	1298	9.47	19.8	39.6
21.7	16.7	22.5	80.6	9.31	20.9	37.5	723	10.1	19.6	23.7
3.89	7.23	29.7	65.5	19.8	29.2	40.7	491	10.8	55.7	49.6
24.1	16.3	24.1	25	12	16.1	14.5	523	11.5	34	37.2
16.5	13.6	16.7	36.5	6.79	35.5	54.2	474	7.43	41	50.5
7.77	12.3	26.2	34.9	1	42.2	50	533	8.98	14.9	50.9
75.7	53.3	24.8	21.5	2.41	6.92	16.3	835	38.9	94.7	175
33.7	10.2	34	33.7	8.98	20.9	42.6	599	7.23	10.8	69.2
32.5	13.6	23.1	17.5	5.57	16.7	27.6	655	26.4	47	102
25.3	17.9	9.65	200	24.4	16	31.3	661	36.8	47.8	50
14.3	23.5	18.9	23.9	11.5	12.4	32.8	615	16.1	20.5	31.1
31.1	28.1	26.7	42.9	15.3	2.27	14.5	173	27.1	61	87.4
23.9	17.6	17.6	45.7	9.65	5.94	12.9	533	12.6	23.1	30.8
57.3	50.5	60.4	400	68.5	36.5	59.4	359	35.5	64.9	106
31.9	13.7	20.5	24.4	2.48	8.28	41	610	16	18.6	45.7
28.6	14.5	16.3	21.7	4.29	30.8	46.6	349	22.9	41.4	1.43
17.5	12.7	21.7	19.8	10.8	38.2	48.7	429	47.4	69.2	73
85.1	73.7	6.26	1	2.92	18.1	38.9	604	12.9	21.1	55.7
34	12.9	16.3	75	4.96	3.79	24.1	379	31.3	45.3	93.1
26.4	21.9	35.5	217	49.6	90.6	227	2072	11.3	37.9	29.2
21.1	13.5	4.78	15.1	20.7	4.53	28.6	389	14.3	20.4	47.8
17.8	9.22	14.3	20.7	4.57	25	35.9	365	22.3	29.7	24.4
21.1	17	22.3	26.7	10.6	24.1	28.6	538	11.5	27.1	34.3
26.7	11.2	29.7	29.2	5.62	16.4	22.3	594	5.83	28.4	19.5
16.5	19.3	17.5	34	10.3	57.8	123	1928	4.03	22.1	37.2
26.2	11.3	25.5	24.1	20.5	17.9	38.2	610	13.2	21.3	62.1
30.5	35.5	17.2	168	22.5	7.84	22.9	882	10.3	22.7	70.4
25.5	23.9	52.3	410	56.2	4.41	23.3	418	9.31	25	31.1
36.2	13.1	27.1	30.5	10.2	75	115	414	24.1	40	41.4
21.1	20.9	56.2	441	59.9	10.1	35.9	567	17.8	36.5	64.4
89.8	73	17.6	17.6	13.9	1.7	3.75	331	13.7	35.5	62.6
22.9	13.8	39.6	170	38.5	7.64	17.3	562	1.14	12.3	2.92
17.8	20.4	23.5	133	29.2	15	21.7	599	29.7	62.1	108
19.1	12.3	23.3	15	9.39	15	17.8	410	25.7	28.4	67.9
28.1	23.9	12.4	18.4	9.31	34.6	38.2	286	16.1	26.7	58.8
20.2	10.9	58.8	325	64.4	36.8	48.3	457	29.7	54.2	84.3
33.7	17.6	21.3	41.4	7.37	66.7	95.6	505	22.7	34.3	20.5
13.8	17.6	31.1	38.2	3.85	157	223	433	16	22.7	18.4
41.8	29.2	42.9	211	42.2	47	73	379	6.92	36.5	53.3
7.57	16	13.3	133	8.51	12.1	31.3	599	6.32	43.7	41.4
22.5	15	21.5	237	18.6	13.5	19.1	542	16.4	21.1	55.7
29.2	4.26	27.9	17.5	4.61	47.4	85.8	1230	11.2	20.9	39.2
16.8	18.1	11.1	55.7	5.62	41	54.7	325	15.1	27.6	16.3
31.6	20.4	30.2	29.2	10.3	3.68	11.4	615	3.55	36.8	75.7
23.3	8.13	14.5	15.3	14.9	17.6	20.7	692	18.1	44.5	61
46.6	30	38.5	96.5	22.5	9.65	27.1	673	54.7	82.8	149
30.8	19.8	45.7	113	7.99	13.3	33.4	491	10.1	25.5	37.9
25.9	15.1	24.1	170	8.98	26.4	42.2	557	18.1	30.2	24.6
42.9	23.9	18.9	23.5	14.2	2.86	22.3	483	13	34	49.6
69.8	37.9	15	337	35.2	6.32	61.5	392	41.8	71	57.3
13.9	20.2	32.8	48.3	12.9	17.3	33.4	505	15.7	36.8	41.4
22.1	19.1	20.9	16.1	5.57	149	269	3051	11.9	45.3	83.5
63.2	89	18.9	35.2	25.9	14.7	19.3	743	3.25	15.7	13.1
18.3	18.8	24.1	82	25	89	170	1700	15.4	21.7	47.8
12.6	24.8	17.9	9.65	1	73.7	132	1715	26.7	73.7	97.3
20	19.8	23.9	38.9	7.3	30.8	49.1	1219	16	30	41
18.9	11.5	71	470	80.6	45.7	55.7	392	11	14.7	49.6
69.8	48.7	12.3	23.9	12.6	12.3	21.5	509	11.8	35.9	50
7.99	7.84	35.9	365	44.9	12.6	29.7	1155	6.04	41.4	66.7
22.7	5.38	69.2	359	59.4	4.61	20.2	491	17.3	44.1	53.8
22.9	23.9	23.3	23.7	7.64	10.4	21.3	557	89	170	173
86.6	84.3	13.8	22.9	8.43	15.1	22.1	496	47.4	85.8	160
92.2	63.8	34.6	21.1	8.43	1	7.43	155	10.6	8.98	37.5
28.9	20.7	104	519	88.2	25	35.5	426	51.4	106	179
52.8	30.2	27.6	29.4	17.6	12.9	25.9	594	97.3	129	32.2
23.9	12.2	22.7	27.1	5.33	57.8	75	547	21.3	34.9	42.6
13.6	14.1	9.91	3.89	8.51	10.2	19.6	474	15.4	22.1	33.7
25.7	9.65	23.3	31.6	14.1	54.2	113	2167	7.04	30	34.6
22.5	14.1	75	588	71.7	23.7	42.2	505	7.1	17	4.22
107	92.2	142	667	115	10.4	22.5	799	97.3	131	23.5
8.43	8.74	31.6	267	40	6.15	13.5	483	62.6	96.5	50.5
25.5	15.8	30	35.5	28.9	43.7	69.2	1811	6.44	24.4	47
80.6	57.8	7.23	165	15.5	5.09	8.9	346	11.2	21.1	33.4
55.2	31.3	16.5	19.5	7.1	22.7	44.5	1055	25.9	44.5	59.9
65.5	34.3	21.5	80.6	4.33	25.7	30.8	542	53.3	118	155
19.5	10.9	122	453	73	5.23	27.6	655	20.5	24.8	38.2
28.4	9.82	18.6	198	17.8	93.1	154	1762	57.8	113	153
16.7	14.7	24.1	55.2	30.2	20.4	30.5	626	5.19	20.4	31.3
118	89.8	22.7	19.5	7.04	32.2	38.2	583	20.4	34.9	48.7
22.9	11.4	122	337	50.5	6.61	41.8	626	11.5	31.9	51.9
34.6	17.6	6.61	165	13.2	30.2	89.8	2091	15.1	33.4	56.7
51.9	40	13.5	168	5.99	25.5	39.6	1346	21.1	32.8	12.9
18.1	8.98	40	59.4	18.6	7.5	21.1	400	16.7	35.5	37.2
15.8	25.7	13.8	24.1	10.6	53.8	74.3	538	8.43	32.2	28.4
16.1	18.4	25.9	44.9	33.7	19.6	40.3	528	38.5	92.2	172
17	31.1	24.4	18.1	9.47	17.5	35.2	562	23.7	57.3	66.7
17.9	8.2	10.8	32.2	6.98	21.5	50.9	396	9.22	25.5	38.5
33.4	19.8	17	20.5	6.26	29.2	43.3	284	1	11.4	33.4
40.7	18.3	22.7	26.9	4.87	20.4	41	858	18.8	34.6	30.2
17.2	14.7	24.1	34.3	10.6	36.5	47.4	313	8.51	38.9	47.4
16.5	7.91	14.7	17.8	7.5	9.56	15.5	491	16.1	73.7	79.1
23.3	16.3	26.4	30.8	10.5	15.3	26.4	777	26.2	33.1	39.6
20.9	16.3	21.9	27.9	12.5	14.2	22.1	604	19.3	40.3	38.9
67.9	53.3	22.1	22.3	8.58	46.1	53.3	500	21.7	35.9	49.1
33.4	8.9	20.9	25.9	5.78	17	22.3	717	11.7	32.2	57.3
21.3	7.91	4.78	12.4	4.7	14.2	36.2	649	6.38	22.9	38.2
16.8	13.6	19.1	26.2	16.1	33.7	63.8	806	22.1	37.5	64.9
19.6	17.2	38.5	286	24.6	17	26.9	583	6.73	34.6	32.8
61	47.4	11.7	46.6	28.9	44.9	104	3368	15.8	27.9	51.9
40.3	22.7	5.38	8.98	6.1	109	136	400	34.9	110	253
28.9	20	15.3	21.7	3.79	93.9	130	1037	13.1	30	23.3
21.3	16.4	14.1	22.9	2.59	25.9	42.9	311	1.78	75.7	5.52
18.4	19.3	158	91.4	250	13.3	30.5	717	40.7	73.7	121
59.4	19.1	9.14	121	26.9	60.4	131	1981	21.1	41	43.7
17.8	3.43	18.4	28.9	18.1	64.9	137	2288	12.6	30.2	24.8
18.3	17	21.9	18.9	4.57	4.66	3.79	91.4	16.4	39.2	49.1
25.7	10.1	47	49.6	10.2	17.3	32.2	368	5.42	16.3	40
80.6	52.8	16.1	10.3	3.68	63.8	84.3	523	24.8	46.6	63.2
50.5	47.8	17.6	31.3	13.2	37.5	49.6	437	10.5	18.8	4.29
77.7	61	4.49	3.13	7.1	18.6	36.2	487	16.4	26.9	42.6
26.7	22.7	15.8	137	30.8	61	93.9	882	9.73	26.4	54.2
19.5	2.41	12.6	158	12.1	9.22	20.4	806	23.5	32.8	36.5
35.2	20.5	46.6	38.9	20.5	8.2	75	698	6.85	10	54.7
30	17.3	1.51	5.73	1.01	4.83	17.3	466	53.3	72.3	65.5
20.2	13.7	25.3	35.2	31.3	6.73	49.1	426	43.7	71	217
19.8	22.1	3.37	5.33	6.21	40	50.9	578	84.3	153	215
23.1	25.7	15	215	20.4	20.4	35.2	557	16.5	34.9	22.5
14.6	10.9	10.9	21.5	17.5	19.5	27.9	770	7.3	17	69.8
23.7	24.6	45.7	207	32.8	38.2	62.6	552	19.1	30.8	31.6
26.4	12.3	26.4	17.6	1	86.6	143	1963	4.78	18.3	27.4
22.7	21.1	30.5	29.7	17.5	33.7	46.1	437	51.4	146	213
24.1	19.5	19.6	26.4	4.74	14.9	25.7	679	1.02	2.46	7.04
6.15	17.5	24.4	26.7	4.57	19.6	32.2	557	15.1	33.4	50.5
32.2	19.8	28.6	31.9	5.42	44.9	91.4	991	1	56.2	11.1
75.7	86.6	20.2	80.6	20.7	3.68	15.7	1114	17.5	32.8	31.1
42.9	34	67.3	250	39.2	9.73	21.3	583	77.7	150	146
108	71	20.7	27.9	6.04	26.2	39.6	496	15.1	29.4	56.7
11	18.6	12.6	269	17.6	15.4	28.1	487	8.9	20.9	32.5
13.5	15	27.1	167	15.3	29.4	42.9	437	23.7	40.3	35.5
21.1	10	27.6	28.1	8.06	8.51	20	757	16.7	16.7	45.3
16.4	6.98	3.75	5.62	1.22	32.2	47.4	523	31.3	52.3	82.8
63.2	59.4	22.7	57.3	12.5	54.2	77	340	41.8	75	85.8
19.6	5.05	42.6	84.3	30.8	25.3	64.9	1778	7.7	22.3	61
23.5	13.2	22.1	17.8	1.19	12.9	37.9	1762	22.9	25.3	51.9
17.2	8.2	23.3	71	18.6	13.3	31.9	400	56.2	101	355
9.39	41.4	4.53	13.3	8.82	63.8	106	1104	58.3	110	183
20.2	19.6	29.2	35.9	4.53	22.5	29.7	500	10	25.9	53.3
24.4	10.9	18.9	15	8.58	14.1	30.5	770	16.5	32.5	40.3
16.7	9.73	22.7	34.9	23.9	6.26	19.6	982	12	21.5	26.2
27.9	14.9	111	284	43.7	34.3	44.5	667	45.3	88.2	158
20.9	12.1	21.3	92.2	6.73	2.04	14.2	334	46.6	69.8	125
31.9	19.6	17.5	13.3	11.9	26.7	42.2	453	16.3	17.2	40.7
16	8.13	16.5	17.2	14.1	34.3	60.4	418	10.5	26.4	32.8
12.9	15.4	66.1	63.8	28.6	22.3	34.9	400	14.3	24.4	48.3
34.6	12.9	21.9	20.9	5.94	18.3	27.6	621	9.31	26.2	37.5
27.6	17	13.9	98.2	10.9	39.6	62.1	552	29.4	45.3	44.5
65.5	34	14.7	13.8	5.38	26.2	44.5	717	13.9	36.5	52.3
19.8	18.3	15.5	19.6	10.6	6.73	39.2	1611	11	37.9	59.4
11.9	18.9	24.4	21.1	10	17	32.5	474	20	26.9	24.1
9.65	12.3	20.4	12.1	1	42.9	59.9	632	30.8	48.3	45.7
26.4	11.2	63.8	542	92.2	13.7	28.6	723	15.4	30	34.3
34	12	77	292	47.8	37.5	84.3	1197	16.4	38.9	22.7
29.2	29.7	24.6	15.5	3.62	5	8.13	991	19.6	37.5	17.8
43.7	7.7	50.9	86.6	40.3	25	58.8	1540	17.8	31.9	62.6
44.5	17.3	21.1	22.5	13.5	2.33	16.4	466	66.7	142	271
25.7	40	19.5	17.9	11.5	34.3	74.3	2436	12.7	42.6	76.4
73.7	62.6	20.9	12.6	3.72	17.9	30.8	649	8.82	23.5	13.7
16.5	7.91	25.5	20.5	4.78	34.3	83.5	1640	11.3	27.1	34
38.5	22.5	22.9	19.8	4.41	25.3	34.3	365	9.56	30	56.7
30.5	15.8	29.4	129	28.6	103	163	1554	4.37	9.65	9.47
36.2	35.5	29.2	46.1	14.7	16	25.3	403	17.8	45.3	51.9
27.9	16.7	4.87	8.43	16.8	76.4	127	1395	17.5	25.5	29.2
14.1	15.3	32.5	305	57.8	1	4.96	241	23.7	55.7	82.8
41.8	26.2	23.1	26.2	4.61	2.09	18.4	362	13.7	29.2	20.9
20.7	28.6	12.6	41	10.3	24.8	41	638	12.5	18.6	69.2
16.4	18.4	21.7	13.9	6.26	24.6	36.5	644	13.6	37.5	57.8
32.8	10.6	21.9	54.2	10.6	23.7	33.1	289	15	31.9	41.4
111	107	13.1	17.8	6.79	20.7	34.9	757	11.5	22.1	38.5
13.9	39.6	15.4	22.5	7.1	31.1	43.3	396	72.3	167	372
85.1	64.4	6.85	13.7	5.47	32.8	63.2	1981	11.2	18.4	44.9
68.5	63.8	26.2	23.3	3.79	5	8.51	547	23.9	41	52.8
16.5	8.2	20.4	115	19.5	4.14	16.1	453	8.43	17.3	21.9
12.9	15.4	23.7	14.9	3.82	62.6	127	3023	13.5	15.8	48.3
11.7	14.5	21.5	13.6	10.6	69.2	108	2054	9.14	22.3	29.2
13.7	37.5	18.6	23.9	7.3	63.8	108	638	6.38	16.8	17.9
22.7	11.8	22.1	23.3	9.39	107	274	3460	18.6	36.8	28.6
20	13.1	25.9	94.7	10.9	35.5	63.2	1155	11	24.8	45.3
13.2	13.3	8.82	24.6	25	2.57	15.7	449	29.7	55.2	66.1
9.39	19.1	53.3	105	35.5	66.7	118	1946	12.6	28.9	23.5
47	32.2	41	253	36.5	5.38	26.2	514	13.7	26.4	34.3
25.5	8.98	93.9	649	107	30.2	37.9	505	28.9	53.8	41.8
66.1	20.4	10.6	176	17	51.4	77.7	491	26.9	42.2	46.6
6.92	6.32	24.6	16.7	6.26	13.3	14.6	474	7.57	50.5	77
88.2	61.5	21.7	26.7	5.73	87.4	158	2788	17	19.5	50
14.7	21.9	1.18	5.78	11.2	7.77	13	552	22.7	32.5	55.2
9.91	21.7	19.8	18.9	7.1	33.4	50.9	533	19.6	42.9	44.9
52.3	30.8	15.1	68.5	1.96	96.5	132	422	9.56	8.74	30.5
46.6	31.9	1	1.01	9.06	2.57	27.9	478	10.1	35.9	52.8
98.2	56.2	12.4	200	18.6	38.9	60.4	784	18.9	20.7	38.5
16.3	9.39	25.7	11.9	1.91	150	225	2308	18.1	33.7	25.3
14.7	10.1	7.5	66.7	3.4	18.3	38.5	1055	9.47	43.3	67.3
9.91	13.5	33.1	57.3	21.3	11.8	29.2	594	15.3	26.7	56.7
22.3	10.4	16.5	17.3	14.7	25.5	22.3	253	34.9	74.3	106
14.2	10.5	46.6	302	63.8	25.3	38.5	392	19.3	44.1	53.8
28.4	32.8	28.9	35.2	11.9	106	181	1747	6.26	24.6	44.9
13.1	27.4	15.8	29.7	10.7	5.73	16.3	457	13.1	32.5	57.3
53.8	7.77	24.1	49.1	4.18	24.6	34	457	7.3	26.9	75
21.3	15.1	16.3	23.9	4.61	44.1	62.6	632	37.2	67.3	150
6.67	6.21	22.9	34.9	1.53	27.1	38.2	474	13	17.9	37.9
26.4	11.3	11.1	29.2	10.6	1	3.25	305	73	157	237
21.3	14.2	22.3	47	20.7	132	196	1310	11.1	21.1	58.8
22.5	30.8	24.4	18.3	13	30.8	43.3	352	11	16.7	34
31.6	13.9	14.1	21.7	1	7.91	23.7	615	18.4	42.2	121
12.4	4.7	14.3	75.7	7.91	10.3	33.4	799	2.46	6.55	33.7
61	14.3	6.32	229	19.3	9.14	12.3	528	15.5	24.8	35.9
16	8.82	15.3	58.8	18.1	36.5	52.8	375	17.2	30	39.2
77.7	105	20.5	126	10.1	19.5	33.4	496	12	15.7	52.8
62.6	49.1	27.1	20.7	6.85	15	36.5	806	8.74	31.3	71.7
21.1	17.3	4.37	1.89	2.71	14.1	30.5	610	15.3	33.1	50.5
17.2	14.1	16	37.2	12.1	16.5	29.7	514	13.5	33.4	33.4
43.3	26.2	23.3	16	3.16	40.3	58.8	588	10.4	28.6	57.3
6.32	10.1	25	17.3	1.37	3.55	21.7	509	8.66	25.3	48.3
13.8	17	9.47	259	20.4	32.8	48.3	528	21.9	34	52.3
25.7	7.64	48.7	389	59.9	10.3	29.4	649	10	20.5	30
14.9	10.1	24.4	17.9	8.13	16.5	22.5	547	13.1	30	41.4
22.3	5.94	57.8	505	75.7	11.1	20.9	777	10.5	16.5	19.6
14.1	10.1	32.8	47.4	14.7	14.3	55.2	3023	13.1	30	38.5
37.5	20.4	14.1	215	27.4	17.9	22.5	743	14.5	46.1	40
17.3	8.66	22.7	33.1	16.7	45.3	48.7	453	16.5	43.3	60.4
17.9	16.3	52.8	279	27.1	30.2	45.3	449	10.6	35.2	48.3
22.9	27.1	8.82	27.4	9.31	10.4	23.3	644	16.1	16.4	37.9
21.1	13.3	47.4	10.7	56.2	54.2	101	1346	5.33	59.4	6.79
13.2	18.6	19.6	21.9	3.05	31.6	42.6	349	62.6	123	229
19.6	29.4	57.8	573	62.1	18.3	28.6	644	13.6	37.5	44.5
10.6	11.3	21.7	15.1	6.26	8.9	86.6	3429	32.8	63.2	107
12.5	15.8	38.2	211	27.6	8.51	24.1	1540	16.5	31.1	31.9
13.9	11	26.2	24.8	2.02	16.5	27.6	679	10.4	22.1	61
22.1	5.28	23.7	36.2	11.4	10.7	22.3	449	10.4	25	36.2
13.9	5.33	25.5	16.7	7.1	23.3	51.4	1114	11.5	15.3	17.5
22.1	20	6.98	16.8	18.1	28.4	46.6	359	16.1	42.6	122
59.4	51.4	29.4	349	39.2	38.9	53.8	528	16.7	37.2	33.7
18.4	8.35	19.6	24.1	3.96	19.5	35.9	858	3.25	77.7	9.65
34.3	34.3	16.1	67.3	17.3	44.9	54.7	362	4.91	8.35	31.3
13.9	15.5	7.43	16.4	11.4	23.5	43.3	396	13.5	33.7	61.5
22.5	14.3	17.5	131	26.4	93.1	147	1794	12.1	42.9	25.5
28.4	31.9	24.6	29.4	2.69	28.4	42.6	461	22.1	40.3	50
37.5	2.67	24.4	170	18.6	27.6	47	457	12.2	22.3	27.6
21.7	16.7	17.3	18.8	13.9	61	100	1037	11.4	34.9	48.7
14.9	11.9	21.5	22.9	11.2	48.3	79.9	514	53.8	109	164
19.3	8.2	15.8	21.1	5.88	4.87	20.2	890	15.3	23.1	41.8
26.7	31.6	6.79	19.8	6.15	67.3	115	1715	29.2	54.2	37.5
17	13.5	15	337	34.6	25.7	42.6	368	26.4	48.3	46.1
28.6	55.7	13.7	170	28.1	23.7	35.2	519	11.8	20.7	47
12.3	9.47	17.3	13.6	15.4	33.4	57.8	437	16.7	26.9	68.5
13.1	23.7	11.8	141	15	12.6	28.4	567	13.8	18.3	52.3
31.6	22.7	20.5	127	16.1	15.5	29.4	491	12.9	38.5	36.5
32.2	20	21.1	20.7	7.43	85.1	133	2129	9.22	25	53.8
17.2	14.2	21.7	13.8	6.04	31.9	50	557	5.47	28.6	44.5
8.98	6.21	20.7	13.7	12.9	42.6	62.1	542	14.3	22.7	51.4
13.7	15.3	17.5	22.9	9.56	18.9	42.9	496	9.73	59.4	48.3
64.9	38.2	50.5	269	44.9	11.8	17.5	496	13.9	31.6	40.7
20	13.1	17.9	44.9	5.38	3.85	8.82	305	17	27.1	64.9
11.9	20.9	11.1	2.94	29.4	3.28	21.5	514	9.82	17.8	29.7
2.29	19.1	18.6	12.6	2.59	33.7	43.3	557	10.1	11.8	1.01
61.5	34	3.55	9.22	8.58	21.7	42.9	866	8.98	23.5	28.1
25.3	20.9	15.4	25.7	10.2	5.94	7.99	655	13.7	17.9	45.3
27.1	14.9	15.5	24.4	12.7	21.9	35.5	355	96.5	130	37.2
12.2	9.91	21.7	279	58.3	11.3	20.7	542	12	24.4	35.9
49.1	35.2	25.7	37.5	10	5.23	12.1	813	10	21.7	45.7
11.4	4.33	11.1	96.5	14.3	22.1	44.1	890	8.74	32.8	56.2
20.7	9.06	23.5	20.4	4.61	57.8	82	922	52.3	80.6	111
13.9	16.8	30	38.2	16.3	43.7	90.6	2207	41.8	76.4	157
90.6	42.9	13	14.1	45.7	87.4	142	2503	20.2	36.5	58.8
34.3	41	5.19	5.88	13.1	25.5	52.3	305	14.9	36.2	41.4
17.6	12	10.7	16	3.89	155	267	3555	17	31.9	56.2
18.8	20	3.22	322	37.2	64.4	88.2	1018	15.8	24.6	41.4
16	14.5	16.5	175	18.4	29.4	38.2	300	17.5	41.4	57.8
12.4	35.5	11	126	19.6	4.74	31.1	698	10.9	29.7	34.3
23.3	14.5	20.7	276	24.8	19.1	77	1640	42.9	72.3	143
7.77	19.5	42.9	302	55.7	3.72	16.5	615	12.1	18.6	27.1
18.1	16.1	30.2	31.6	13	85.1	125	1241	24.6	49.6	46.6
61	5.67	25.9	26.4	7.5	24.1	45.3	505	18.1	28.9	63.2
26.7	16.4	21.7	29.4	4	16	22.1	509	67.9	151	349
9.22	16.5	19.3	21.1	13.8	19.1	26.7	655	67.3	145	331
39.6	16.3	32.8	33.1	7.7	62.6	93.9	1811	11.8	29.7	51.4
157	74.3	32.5	54.7	13.8	32.2	49.1	858	13.1	38.9	57.8
22.5	12.3	34.9	322	56.7	21.7	37.9	538	21.1	22.9	30.8
14.5	12.1	27.4	17.5	8.06	80.6	117	379	4.29	10.5	44.9
126	213	18.9	111	20.9	14.3	27.4	505	12	16	18.9
23.7	11	41.4	75.7	3.02	85.1	105	372	19.8	33.7	63.8
26.4	7.43	21.5	89	10.1	16	30	474	2.31	6.38	10.6
39.2	48.7	17.8	11.4	1.93	78.4	121	1197	24.6	44.9	53.3
21.9	20.4	55.7	483	61	28.1	44.5	757	11.8	17.3	59.4
22.9	7.43	80.6	279	42.6	27.4	45.3	1433	65.5	113	107
15.3	13.9	23.1	17	1.5	15.5	29.7	939	3.82	35.9	13.3
30.2	14.7	17.6	29.2	10.3	3.19	17.8	289	12.7	32.8	36.5
23.7	17	24.8	89	14.9	39.6	58.8	441	8.06	15.5	11.1
17.5	16.5	19.3	158	27.9	9.22	27.4	626	18.9	27.1	77
18.1	21.3	16.1	109	14.7	17.8	28.9	509	10.8	25.9	64.4
24.4	17.9	3.08	11.1	2.13	17.9	38.2	528	9.82	16.8	38.9
28.6	16.1	38.9	198	43.7	53.3	68.5	644	1.58	6.98	8.35
14.2	7.99	6.79	12.7	21.5	139	198	1310	4.78	10.9	2.94
51.9	32.8	77.7	461	63.8	27.4	39.6	547	42.6	75.7	40.7
5.38	17.6	35.5	557	61.5	32.8	55.7	843	36.8	61.5	125
12	9.82	27.9	23.9	7.84	52.3	75.7	457	12.4	22.9	34.3
90.6	77	81.3	334	64.9	2.35	33.7	368	1	49.6	6.38
12.7	13	16.7	100	15.4	7.77	24.8	813	25.5	71.7	112
20	14.3	12.5	126	14.7	12.5	43.7	820	11.5	21.1	1
13	8.28	23.1	24.1	7.37	57.3	83.5	1046	13.2	35.9	58.8
12.4	9.39	41	77	23.5	52.8	94.7	1075	9.56	21.3	36.2
7.91	27.4	19.5	147	27.4	20.5	24.8	457	17.2	23.3	50.5
60.4	29.4	27.1	16.5	2.07	8.13	26.7	583	20.7	37.2	32.5
10.9	19.3	31.9	262	60.4	13.8	14.6	784	66.1	97.3	204
17.3	18.3	14.2	15.1	8.74	49.1	94.7	2110	13.2	31.1	46.1
13.9	15.1	26.4	36.5	9.14	32.5	36.8	710	3.43	73	2.76
63.2	64.9	9.91	139	14.7	85.8	121	362	30.5	46.1	29.7
33.4	28.9	12.2	21.7	14.3	22.5	75	1794	15	25.5	38.2
12.2	12.7	16.4	17.2	7.77	3.16	22.7	777	9.39	16.8	38.9
9.47	11	38.5	54.7	17.8	91.4	165	1911	18.8	30.2	38.9
38.5	30.5	24.6	31.1	24.4	28.1	36.2	433	12.4	28.9	61
75.7	82	44.5	54.2	23.3	20.4	28.9	533	12.5	37.5	45.7
21.5	10.3	19.6	186	23.5	8.35	29.2	843	12.7	28.9	48.7
16.1	13.5	24.1	7.17	8.43	20	37.2	866	15.4	30	53.3
17	17.9	1	15	10.2	34.9	63.8	414	11.3	25.7	35.5
25.7	8.66	13.9	21.1	6.21	73.7	126	1778	167	403	626
7.84	9.56	21.3	426	48.3	33.7	55.2	496	28.6	52.3	51.9
23.5	21.5	23.9	19.6	5.19	79.1	178	2371	19.3	38.9	47.8
16.4	12.9	23.3	19.6	21.1	28.1	58.8	1176	18.3	31.6	40.7
13.3	9.31	15.1	14.9	6.04	135	189	274	13.8	15.8	34.6
64.9	64.9	19.3	19.6	16.3	85.1	127	1928	1.46	10.7	20.2
8.35	25.5	23.5	25.3	14.2	2.09	10.6	217	42.9	68.5	58.8
18.3	17.5	19.8	22.3	2.64	119	191	2690	12.6	28.1	26.7
6.04	32.8	24.1	24.4	1.06	83.5	145	1762	9.31	15	7.37
16.3	9.31	35.5	178	27.1	102	157	1700	10	16.5	52.8
45.3	33.4	21.7	18.1	8.2	36.8	61.5	1104	12.1	17.3	47.4
9.39	19.6	14.9	92.2	14.2	42.9	66.7	1009	37.9	56.7	59.4
8.28	14.6	40	359	44.9	267	368	3106	15	25.3	38.2
12.9	14.2	22.7	28.1	5.73	15.5	32.8	483	14.2	24.8	48.3
2.74	3.11	44.9	211	41	22.1	39.6	491	11.9	29.7	34
21.7	16.8	20.5	108	16.7	12.6	24.1	542	17.8	40.7	36.5
18.4	16	25.3	12	8.9	17.5	32.2	583	10.6	32.5	46.6
19.5	15	15.5	178	11.9	64.9	83.5	1009	21.5	25.7	42.6
38.9	30.5	22.7	21.9	6.73	12.6	23.5	583	4.37	16.5	75.7
16	17.8	20.5	21.1	4.7	18.9	39.6	365	11.8	24.8	30
81.3	55.7	98.2	567	62.1	105	173	2371	15.3	9.47	51.4
18.4	15.1	23.7	26.4	3.49	37.5	56.2	757	13.7	22.7	50
23.7	18.9	14.6	13.8	3.59	52.3	68.5	457	12.5	29.2	44.5
3.19	11.7	20.9	22.5	3.31	28.9	44.5	500	14.7	27.4	29.4
19.3	15.8	19.6	57.8	23.3	12.4	25.5	547	15.1	36.2	30.2
85.1	61.5	18.1	18.1	5	22.5	33.7	1134	10.9	21.9	24.8
9.06	13.9	46.6	114	12.7	10	31.3	828	8.51	25	30.2
155	109	3.59	7.04	8.82	15.7	25.5	737	10.6	20.2	35.2
8.58	10.2	15.8	23.1	2.02	94.7	122	453	16.3	48.7	130
75.7	56.2	18.6	32.8	10.6	18.8	33.1	523	11.8	32.8	41.4
27.6	37.2	69.8	137	32.8	16	34.3	685	12.1	18.8	29.4
24.6	35.2	15.7	50	14.6	38.9	69.8	470	9.65	16.8	34.6
27.9	25.9	29.2	25	5.23	44.5	69.8	1459	28.6	47.8	146
16.1	13	23.3	16.1	10.9	37.9	53.8	433	54.7	127	115
37.2	31.9	9.82	211	21.1	6.85	17.3	649	18.6	37.2	133
9.39	13.1	20.2	46.1	21.1	58.3	101	1446	9.47	14.9	21.1
32.2	22.9	1	4.87	5.23	28.1	42.2	547	8.51	22.9	51.9
10.8	9.31	10.3	313	22.7	14.9	21.3	538	25.9	58.3	14.9
17.6	14.9	13.6	11.8	3.43	17.9	27.9	583	9.73	26.4	19.5
16.5	8.43	16	17.3	1.39	17.5	22.3	599	32.8	44.9	71.7
13.8	22.3	13	99.1	2.11	42.6	49.6	359	27.1	55.2	49.1
16.3	7.84	33.4	313	20.5	70.4	110	2035	25.9	49.6	66.7
24.4	10.1	24.8	22.5	4.45	6.26	38.9	1219	16.3	24.6	33.4
90.6	62.6	1.76	3.34	5.42	27.1	95.6	1382	29.2	52.3	106
70.4	63.2	17.9	14.1	14.1	108	161	2267	7.99	22.5	46.1
56.2	21.5	70.4	368	77.7	17.3	29.4	698	39.2	72.3	66.1
24.8	9.14	22.9	470	46.1	28.9	44.5	457	9.39	15.5	24.6
19.5	10.6	21.1	35.5	5.83	12.5	17.9	655	12.6	15.1	35.5
20	12.1	16.5	19.3	15.8	95.6	160	1395	10	32.2	33.4
22.7	18.9	52.8	160	40	28.9	52.8	441	14.1	34	52.3
14.7	16.7	10.8	14.7	21.3	25.7	37.5	487	6.38	22.5	28.6
23.5	17.8	26.2	153	19.5	14.7	36.2	1009	9.73	29.7	75
20.9	7.5	4.33	18.3	15.8	17	27.9	610	12.4	34.6	39.6
19.1	10.6	12.3	20.9	16.8	55.7	93.1	1625	31.1	61.5	42.2
119	96.5	61	453	85.8	20.5	34.9	422	6.98	21.1	24.4
21.5	13.6	13.7	37.2	6.55	17.6	30.8	685	3.72	13.8	44.1
21.3	11.8	22.9	170	20.2	69.2	118	2110	54.7	79.9	19.8
12.3	12.9	13.9	13.7	8.13	13.2	65.5	1433	13.6	32.5	51.4
18.6	18.8	31.9	359	45.7	63.8	119	2187	39.6	85.1	235
54.7	47	29.4	44.5	7.77	2.39	17.9	279	19.1	47.8	53.8
23.5	13.3	35.2	41	25.9	12	33.1	626	31.9	74.3	138
72.3	15.5	63.8	264	68.5	28.6	52.8	457	9.56	22.1	43.3
19.8	17.5	17.5	28.1	7.5	5.19	38.2	906	23.7	49.6	6.38
11.8	13.2	17.2	137	19.5	15.3	38.2	791	20	33.7	30.5
38.5	35.2	20	223	30.5	18.3	44.9	474	16	16.3	55.2
12.4	16.1	136	410	95.6	11.5	22.7	368	15.1	30.5	40
15.7	23.1	12	36.2	2.29	10.7	28.4	433	39.6	85.1	80.6
37.5	23.5	22.5	23.1	8.9	68.5	86.6	858	15.7	37.5	81.3
15.7	19.3	52.3	68.5	21.1	7.43	31.6	777	83.5	160	231
25.3	13.5	49.1	130	31.9	77	126	2247	7.99	26.9	26.9
12.9	9.39	40.3	193	34.3	269	379	1685	2.76	7.1	29.4
17.8	11.7	3.52	20.4	16.8	28.6	45.3	1009	2.86	23.3	58.3
29.2	4.03	18.6	17.3	7.17	12.3	26.9	599	50.5	120	186
23.1	28.1	23.3	25.7	17.3	10.4	11.4	737	2.89	14.6	13.9
33.1	16.4	108	297	71.7	106	131	407	5.88	18.9	52.8
84.3	67.3	19.5	18.9	1.49	23.1	50.5	429	7.43	18.3	31.9
23.3	17.3	45.7	461	55.7	32.2	42.9	410	8.9	21.1	43.3
14.9	11	23.1	19.1	11	29.4	47.8	343	4.18	57.3	6.85
14.9	17.9	17.8	26.9	13.5	19.3	35.2	965	7.3	23.1	31.1
53.8	22.3	24.6	28.4	13.2	17.6	56.7	2436	262	334	7.84
20.4	9.22	20.7	23.5	4.61	54.2	78.4	649	32.8	68.5	107
7.23	10.4	1.38	5.94	4.45	10.2	17.6	644	6.79	23.5	25.9
84.3	48.7	20.9	27.9	14.9	47.4	77.7	414	11.9	27.6	28.6
40.3	23.1	28.4	20.9	6.15	13.8	33.4	939	11.4	16.8	37.9
113	78.4	20.7	28.9	7.43	79.9	133	692	6.21	10.9	1.68
21.7	15.5	24.6	16.7	3.37	25	44.9	604	4.61	37.9	77.7
18.4	13	16.7	11.7	2.94	41.4	59.9	1114	8.98	25.5	57.3
48.7	10	29.4	26.4	8.66	10.6	17.8	127	6.55	23.3	34.3
6.44	14.7	21.7	29.7	6.26	4.07	16.4	1046	23.5	28.6	37.5
20.4	15.4	20.7	29.4	9.39	38.2	61	1459	36.8	87.4	191
12	8.13	36.8	47	12.5	39.2	91.4	1472	9.22	24.6	42.6
29.7	20.9	4.1	16.7	18.3	17.6	34.9	784	9.39	32.5	35.5
19.3	24.4	20.4	26.2	1.25	38.2	63.8	1286	19.1	20	68.5
21.1	38.2	31.3	34	8.98	2.97	21.1	519	10	26.9	38.2
41.8	26.4	31.3	91.4	27.1	30.5	51.4	385	4.61	31.6	38.5
20.5	10.5	22.3	15.4	12.7	33.4	67.3	429	37.9	79.1	100
37.2	26.7	20.2	61	12.3	18.1	38.9	947	4.26	15	26.7
42.2	33.1	5.83	15.1	6.04	90.6	172	2187	13.7	23.7	53.3
42.6	42.9	22.9	31.9	10.7	19.1	34.3	655	12	15	35.9
16.8	5.67	25.9	48.3	24.8	6.98	11.2	445	5.47	16	14.1
15.8	10.4	23.9	20.4	7.43	4.91	22.9	457	31.1	46.6	93.1
15.3	6.04	18.1	36.2	11.1	48.7	61.5	750	25.5	51.9	41
28.1	14.1	9.82	186	52.3	3.02	21.9	328	5.99	23.5	42.2
33.1	30.2	17.2	26.7	2.02	17.2	27.6	372	20.2	19.3	37.2
40	30	41.8	36.5	5.42	26.7	35.9	437	31.9	77	79.1
22.9	21.9	18.9	56.7	13.2	11.3	25.3	621	16.1	28.1	30.2
20	11.2	35.2	36.2	9.22	3.37	3.49	110	17.9	33.7	36.2
27.1	28.6	22.9	209	30.8	40	62.1	626	54.2	87.4	9.31
17	12.7	47.4	114	48.7	8.06	16.5	784	5.09	14.1	45.3
16	29.2	17.3	23.9	20.2	38.2	57.3	519	12	31.9	63.8
28.6	22.5	15.8	33.7	13.1	33.7	53.8	286	37.2	78.4	167
15.4	8.66	3.25	4.45	2.55	154	308	4451	41	104	179
17.6	14.3	18.9	15.8	6.26	46.6	71	578	11.5	17.2	67.3
26.7	15.7	25.3	31.1	5.67	8.66	29.7	1009	12.6	42.6	33.7
32.8	13.5	1.61	1	6.04	56.2	78.4	1055	12.9	34.6	40.7
125	71	25	34	14.3	30.8	40.3	457	11.9	32.8	26.9
19.3	19.1	20.5	248	27.6	58.3	80.6	255	16	22.5	38.9
11.5	11.8	31.9	322	51.4	10.3	24.4	578	6.26	15.8	29.4
85.8	61	61	372	59.4	37.5	55.2	313	36.5	75.7	196
28.6	14.7	15.8	211	20.4	8.82	15.8	649	28.4	51.9	83.5
58.8	32.5	2.57	9.39	11.8	80.6	122	478	50.9	106	289
24.1	21.1	2.17	1.83	2.92	3.02	17.2	127	13	36.8	93.1
21.9	10.2	24.8	58.8	14.9	24.1	41	302	6.38	22.3	50.5
19.3	8.2	22.1	73	22.9	13.6	22.1	770	24.4	50.9	82.8
32.8	22.1	16.3	17.2	7.7	17.3	27.6	638	11.1	27.9	54.7
27.6	16	18.9	26.7	12.5	82.8	127	1700	103	138	33.7
17.6	16.5	19.1	13.9	10	8.06	82	552	82.8	163	250
13	17.5	10.1	46.6	6.61	23.1	47.8	519	8.28	27.9	40.7
34.9	52.8	20.9	18.9	4.87	22.7	33.7	649	5	17	17.5
24.1	13.6	16.3	19.1	1	82	195	2738	6.67	21.7	19.5
24.4	32.5	17.2	32.2	11.8	44.5	61.5	346	8.9	14.3	21.5
71.7	59.4	13.3	379	21.1	30.2	41	723	44.1	119	160
12.9	6.79	80.6	461	79.9	27.4	45.7	311	20	36.2	24.6
14.2	18.1	23.5	21.9	9.06	36.8	62.6	445	9.39	24.8	26.2
31.6	15.1	9.82	235	24.1	9.73	31.9	770	8.74	27.4	46.1
52.8	32.8	4.03	9.82	8.35	42.9	67.9	791	10.7	21.3	55.2
79.9	56.2	17.5	17.2	10.2	138	217	615	8.43	21.7	47.8
105	34.9	20.9	27.6	4.57	42.6	66.1	505	49.1	82	114
129	21.7	26.4	27.1	3.34	85.1	147	1625	7.17	13	32.2
64.9	38.2	13.6	149	37.2	34	51.4	445	26.4	52.3	87.4
24.6	13.3	10.8	21.5	8.98	26.7	38.9	334	7.37	11.2	36.8
48.3	35.2	14.7	26.4	2.84	12.9	30.5	791	19.3	35.9	33.4
20.7	17.8	22.3	20.9	16.7	33.7	50	491	27.9	47	47.8
32.2	22.5	22.3	107	8.28	18.4	41	750	8.06	36.8	66.1
48.3	27.9	18.1	13.5	10.7	37.9	85.8	2091	6.26	23.9	32.5
15.8	16.7	29.2	441	94.7	27.4	48.3	851	9.91	25.5	44.9
25.9	22.3	32.2	95.6	50	13.9	24.4	1094	5.67	13.2	30.8
31.3	15.5	79.9	552	106	25.3	36.8	372	13	28.1	36.8
17.6	17.9	14.3	25.5	12.5	43.3	79.1	557	9.91	16.7	25
25.7	10.4	18.6	19.6	9.65	14.9	34.9	1027	10	30	57.8
113	103	19.8	33.7	16.7	160	257	1794	27.4	64.9	84.3
9.56	15.8	15.7	14.5	2.35	22.5	42.9	806	11.5	17.3	40
48.3	23.5	33.1	111	31.1	6.73	30.2	743	4.87	23.9	41.4
22.5	14.2	10.6	176	15.7	25	43.3	316	13.1	25.7	50.9
22.7	3.37	20.5	30.2	8.9	18.8	40	784	19.5	31.6	32.5
76.4	46.1	27.4	41.4	7.37	52.3	76.4	552	1.41	29.2	46.6
20.5	9.73	20.5	23.3	9.06	33.1	46.1	487	11.1	23.9	36.2
12.6	39.2	23.3	18.8	3.79	59.4	96.5	667	12.2	32.5	31.6
43.7	23.1	17	17.9	2.86	38.2	47	264	7.91	15.4	24.1
18.1	15.4	21.1	61	10.8	14.7	23.9	389	7.99	15.7	39.6
21.7	10.6	18.8	12.5	6.92	179	279	2187	9.22	17.6	44.5
126	21.9	20.9	25	9.91	16.7	23.7	474	14.1	24.4	48.7
23.7	25.5	16.4	289	22.1	25.9	32.2	441	51.9	83.5	104
21.1	5	35.2	53.3	8.35	123	250	3491	8.58	21.7	44.9
22.5	10.5	18.9	17.2	4.74	93.9	142	956	10.4	35.9	38.5
39.2	11.5	37.5	54.2	23.1	124	179	2288	18.9	36.2	38.2
13.7	9.39	17.6	17.3	2	17.5	27.6	246	12.5	22.5	34
32.2	18.1	91.4	382	76.4	17.6	38.9	882	73	139	328
53.3	36.2	18.4	23.1	9.56	16.3	28.1	710	8.82	12.1	35.5
19.5	7.17	80.6	491	81.3	27.6	46.6	1582	8.35	26.4	61.5
16.8	20.7	3.92	20.7	10.6	30.2	51.4	328	11.4	28.9	37.9
2.92	13	15.1	34.3	2.07	137	178	337	13.7	30.2	65.5
27.6	13	11.2	14.6	9.82	65.5	93.1	418	14.3	26.9	51.9
24.4	5.05	17.3	117	7.99	123	231	1526	23.9	48.3	69.2
27.6	17.9	21.3	20	5.47	17.3	30.5	389	7.3	16.3	34.6
163	39.2	17	11.4	9.06	143	235	1526	6.61	6.21	34
17.5	8.06	24.1	38.5	25	48.7	66.7	352	57.8	67.3	29.2
16.1	18.1	24.6	204	16.3	67.3	198	1655	10	16.5	34.6
28.9	15.1	14.6	5.14	29.2	63.8	79.9	191	22.3	36.2	51.4
22.5	62.1	15.7	21.5	22.7	64.9	121	1197	8.28	26.9	27.6
25.3	58.8	70.4	308	67.9	4.37	12	264	10	24.8	25.3
4.29	13.2	27.1	24.1	11.5	11.3	32.8	523	6.85	14.6	12.2
17.9	11.7	17.8	161	13.1	12.6	21.1	588	51.4	109	143
42.2	25.9	4.22	10.4	1.96	76.4	110	461	1.76	106	3.89
25.3	21.5	66.1	382	77.7	37.9	57.8	483	14.3	39.6	42.6
9.65	31.9	14.7	30.8	8.82	28.1	48.7	649	20.4	39.6	39.2
8.74	13.7	10.2	176	27.9	56.2	119	1700	15	26.7	41.8
17.2	12	25.3	91.4	15.3	7.7	34.9	1700	14.2	23.1	30.2
22.9	21.9	14.9	26.4	8.43	55.2	91.4	882	9.56	17.5	32.5
14.7	8.98	19.1	18.3	1.46	69.8	105	1252	19.8	31.1	31.6
14.6	9.56	12.3	15	17.8	48.3	66.7	567	10.9	24.6	21.9
24.6	22.7	13.6	75	6.73	20.2	37.9	500	9.73	38.2	106
37.2	37.9	13.3	154	17.2	37.2	50.9	313	16.4	28.4	31.3
85.8	106	9.22	257	34.3	14.7	18.9	94.7	9.73	30.5	30.2
17.3	19.6	11.9	83.5	13.3	15.1	27.4	523	4.87	12.3	31.3
9.22	28.1	19.6	14.9	6.92	47.8	76.4	813	12.9	18.1	26.9
23.1	16.4	11.9	46.6	1.01	2.94	25.3	461	8.35	15.5	10.6
13.3	10.2	19.5	20.5	5	6.92	15.7	717	20	32.5	61.5
20.5	9.22	50.9	161	71	10.7	19.3	449	7.77	17.3	61.5
12.6	30.5	61	461	82	11.9	22.3	457	6.73	24.1	33.1
55.7	51.9	11.3	80.6	8.74	46.6	45.3	407	104	125	49.1
20.9	16.3	8.28	111	5.67	30.2	52.3	474	13.9	30.2	39.2
100	73	23.1	26.4	11.1	9.06	28.4	496	23.1	47	62.6
17.8	17.9	10.2	24.1	21.7	38.2	39.6	308	15	25.7	36.2
29.2	16.3	9.82	28.1	4.45	23.1	54.7	1420	17.9	28.1	54.7
19.5	15.4	22.1	21.5	10.3	34.9	52.8	661	7.77	17.5	32.2
33.1	17	51.4	505	65.5	69.2	104	1000	5.38	135	10.6
47.4	26.2	41.4	202	30.2	7.37	16.7	578	2.21	23.5	25.3
7.5	11.7	21.9	28.6	14.7	3.52	24.8	433	7.3	23.7	51.4
47	18.6	13.3	35.5	3.16	20.5	28.9	578	10.4	24.1	36.5
30.8	15.7	63.2	552	51.4	18.6	27.4	528	74.3	129	153
10.6	14.6	14.7	22.3	9.91	12.7	44.9	1065	14.2	30	76.4
33.1	58.8	29.7	368	34.3	40.7	53.8	906	14.1	28.1	57.3
16.3	16.1	5.38	5.62	11.8	28.9	41	300	8.13	20	25
123	73	13.9	107	22.5	20.5	39.2	661	19.8	48.7	157
22.5	17	25.7	33.1	12.2	44.1	72.3	1700	11.8	40.7	102
26.2	11.3	4.91	2.69	9.82	32.2	50	382	8.13	17.8	18.1
18.4	9.31	25.9	305	47.4	28.6	43.7	359	24.1	53.8	89
36.8	20.9	19.3	28.4	2.25	124	168	679	10.6	34	32.2
19.1	25.9	26.2	173	19.8	61.5	115	2247	19.8	31.3	62.1
17.6	18.9	17.8	20.7	10.9	5.99	50	588	9.82	23.5	39.6
21.5	8.51	29.7	106	12.4	106	178	1981	34.3	79.9	110
18.8	8.74	1	7.1	11	5.52	20.5	523	14.5	25	59.4
36.2	10.8	47.8	53.3	5.73	8.9	26.2	965	2.33	13.7	51.9
3.46	2.39	6.49	23.9	18.3	132	189	644	10.7	31.6	61.5
47	25.9	19.3	16.1	1	17.8	98.2	2839	12.9	24.4	37.2
7.37	11.1	12.7	107	9.14	13	23.7	644	22.7	39.2	49.1
17.9	12.3	1.02	10.6	11.4	2.23	29.4	474	8.66	2.33	12.1
19.6	18.9	18.1	38.2	23.3	4.7	27.6	851	10	34.6	49.1
17.9	19.8	41.4	191	18.8	3.72	27.4	372	10.1	21.7	29.7
12.6	16.3	15.5	62.6	19.1	28.6	47	483	6.32	20	43.7
75.7	57.3	23.3	202	36.5	4.7	12.4	441	12.5	23.3	70.4
113	66.7	46.6	433	59.9	18.4	31.9	851	22.3	38.2	40.7
120	53.3	5	12.1	11	114	160	991	4.57	25	40.7
35.5	25	13.9	103	15.1	15	22.7	594	12.1	19.8	33.7
33.1	22.7	4.22	3.08	12.5	60.4	107	1358	7.7	6.55	30.5
15.3	7.17	19.8	22.9	7.91	14.5	38.9	644	21.7	45.7	110
14.1	22.3	15.3	343	40.7	28.6	47.4	334	7.3	52.3	115
28.1	24.8	20.9	23.7	6.38	12.5	27.1	414	13.1	27.6	32.8
28.1	11	36.2	37.2	28.1	101	149	1263	15.8	28.1	69.8
8.13	18.3	19.6	21.5	11.5	29.4	50.5	349	5.62	18.6	31.1
11.2	49.6	26.4	44.5	33.7	26.9	47.8	382	7.99	26.4	40.3
28.4	22.3	36.5	33.1	11.2	35.9	56.2	294	16.5	30	67.3
25.7	15.3	35.2	38.2	2.05	36.5	56.2	588	9.56	21.3	40
16.5	14.7	23.1	17.3	1.06	76.4	150	2054	13	29.4	47.4
11.7	15.5	28.1	33.4	9.65	38.9	50.5	604	4.14	9.47	43.7
124	73	18.6	30.2	8.2	11.9	29.7	403	27.9	64.9	112
23.9	14.6	11.9	233	43.7	71.7	92.2	1395	7.84	40	52.8
20.7	15.4	59.4	193	58.3	76.4	115	359	11.3	20.4	34
17.2	12.3	17.3	178	31.9	32.5	48.3	496	16	34	28.1
23.5	8.58	25.7	33.7	15	119	281	1670	12.2	29.4	32.8
13.7	18.6	15	106	9.47	8.9	18.9	583	11.5	18.3	31.6
119	37.2	67.9	528	92.2	54.7	73	385	11.1	40	37.5
14.3	11.9	46.1	69.2	72.3	42.9	75.7	717	7.37	18.1	49.1
66.7	31.1	12.1	213	10.2	44.9	51.4	279	6.98	21.9	39.2
26.7	19.1	18.9	22.1	7.91	25.3	36.2	328	4.29	2.23	13.3
22.7	16.1	14.5	70.4	15	19.6	22.3	692	10.6	31.6	27.6
26.2	17.2	7.17	106	16	9.73	15.7	578	13.8	26.7	89
33.1	17.9	12.9	158	27.4	82.8	146	1499	12.1	20.7	37.5
17.3	8.66	2.92	9.22	3.72	52.3	97.3	1358	13.5	19.6	30.2
8.74	20	7.23	319	32.5	31.9	71	3106	12.2	17.5	51.9
20.7	3.79	53.8	229	46.1	20.4	29.7	426	12.4	26.7	63.2
73	63.2	32.2	28.6	6.15	67.9	112	2890	16.4	24.4	64.4
18.4	10.6	2.27	1.11	509	35.5	62.1	588	6.92	21.5	59.4
38.2	34	13.2	20.5	11.9	4.91	12.7	441	22.5	30.2	73
11.2	22.7	12.2	139	10.1	12.7	26.9	547	31.9	41.4	52.3
66.7	42.6	16.7	10.5	4.45	28.6	39.6	302	33.7	50.5	77.7
1.01	1	1.73	4.96	5.83	42.6	70.4	509	16.4	26.7	47.4
9.31	11.3	27.6	20.7	5.57	100	202	2017	8.51	15.3	26.2
22.1	6.67	8.98	168	9.22	15.4	34.9	547	15.4	47	66.1
21.5	11	10.2	209	16	13.5	19.5	583	28.6	42.9	79.9
45.3	18.6	28.4	45.3	12.9	213	337	4255	9.39	8.06	35.2
20.7	15.7	18.6	114	30.5	31.1	50.9	385	11.9	26.7	53.3
82	61.5	18.9	30.5	2.97	57.8	119	1762	11.4	15.3	42.2
15.1	14.5	10.7	10.7	2.35	32.8	55.7	334	7.99	16.1	34.6
17	14.9	24.4	29.2	13.5	64.4	103	1334	16.5	42.6	63.2
24.6	32.2	22.3	23.9	6.26	104	188	2788	10.2	25.9	53.3
23.9	15.1	26.9	19.5	3.4	5.67	21.5	692	15	35.5	45.3
28.9	16.1	13.2	62.6	21.7	21.3	31.3	519	8.35	18.3	15.5
70.4	55.2	9.14	16.3	10	37.5	55.7	422	10.9	23.9	32.8
20.9	11.4	26.4	26.7	14.7	32.5	60.4	514	16.5	20.7	40
89	67.3	16	24.1	5.09	27.4	36.8	470	19.1	21.1	31.1
12.9	4.14	17.5	13.1	10.3	3.34	33.1	710	10.7	37.9	81.3
19.5	4.53	66.7	297	66.1	46.6	62.6	461	47.8	82	106
17.3	13.8	29.7	313	41.8	35.9	48.3	445	11.7	35.2	73.7
74.3	42.2	24.1	28.6	7.57	18.4	37.9	552	22.5	39.6	47.8
22.1	24.1	27.4	400	32.8	196	274	931	16.7	24.4	40
18.3	20.9	49.6	114	25.7	38.5	52.8	449	18.3	26.9	45.7
50	50	58.8	379	80.6	14.3	18.4	496	6.67	13.8	14.6
38.9	9.91	35.5	93.9	21.9	8.51	54.7	1186	5.73	34.6	38.5
25	10	17.2	17	3.31	34.6	46.6	281	9.65	17	48.7
22.5	14.3	13.1	122	20.9	35.9	71.7	1186	9.82	30.5	28.1
13	26.7	28.6	33.4	16.1	64.4	118	1046	12.4	37.5	147
17.2	15.1	29.7	453	48.3	33.7	47.8	1263	40	78.4	121
9.73	3.05	30.5	30.2	10.4	15	57.3	1144	11.1	20	49.6
21.5	37.9	22.3	24.4	6.44	37.5	55.7	429	5.78	27.4	52.3
11.2	13.2	17.6	7.04	13.8	32.5	46.1	410	2.57	64.9	3.31
3.96	13.7	12	123	13.2	35.2	53.8	615	3.43	23.1	35.2
25.7	8.58	25.3	27.6	8.74	28.6	37.5	426	11.2	26.2	32.2
16.8	18.3	56.7	567	79.1	43.3	65.5	737	16.8	19.1	25
71.7	58.3	69.2	523	61	16.4	29.7	542	21.9	41	59.9
48.3	47	18.4	14.5	3.11	15.8	60.4	2227	8.9	24.4	39.2
21.9	2.76	22.9	125	14.1	15.5	26.9	392	37.5	70.4	145
7.3	16.8	12.7	202	16.7	28.9	49.1	594	5.05	30.2	28.1
19.1	10.4	12.1	195	13	97.3	151	1843	9.73	33.7	37.9
20.7	12.2	12.6	22.5	17.2	96.5	127	1155	6.55	31.3	45.7
30.2	17.9	66.1	276	66.7	50	76.4	673	29.7	56.7	74.3
22.3	22.7	12.7	64.9	6.98	38.5	77.7	2350	8.98	18.1	45.7
30	20.7	20	17.8	12.1	3.96	17.3	407	10.9	26.2	66.7
26.2	4.14	11.5	15	10.3	12.1	21.9	578	15.1	30	53.3
27.9	14.3	9.65	14.3	7.84	19.6	33.1	331	5.94	18.9	26.4
20.9	5.52	23.5	292	56.7	158	257	1794	16.3	41	45.7
16.3	20	16.1	25.3	1.45	55.2	78.4	505	10.4	18.9	44.5
13.7	13	25.5	28.6	8.74	16.4	41.4	466	13.3	31.9	50.9
16	17.2	11.5	21.7	9.39	129	209	1860	12.1	14.9	36.5
22.7	19.6	26.2	26.7	18.9	16.8	30.5	615	13.3	25	39.6
36.8	14.5	17.5	23.5	9.06	9.31	41.4	1298	44.9	71.7	119
8.06	15.7	27.9	31.3	9.47	14.2	36.8	851	9.82	15.4	37.2
31.6	49.6	9.22	167	23.7	84.3	103	311	5.47	15.3	23.1
58.8	11.4	80.6	491	61.5	21.5	47.4	882	13.5	27.1	27.1
18.4	11.5	5.62	15.8	9.82	4	17.8	523	28.4	58.8	126
40	23.7	2.15	60.4	8.28	23.9	45.7	284	8.35	7.3	43.3
12.7	15.8	16.4	13.1	3.34	21.9	46.1	461	9.14	20	28.1
25.3	3.96	8.82	5.14	4.78	18.8	37.9	723	35.9	76.4	186
19.6	18.6	56.7	422	79.1	4.53	8.98	209	6.32	11.2	24.6
29.7	26.2	10.8	25.9	13.7	19.5	30.2	843	3.68	18.8	48.7
16.7	9.82	20.2	372	57.8	65.5	89	362	8.43	15.4	40.3
10.3	11.8	13.7	85.8	20	45.3	77	1186	13.7	20.2	33.1
16.1	10	19.3	23.9	11	123	205	956	18.6	37.5	59.4
20.4	17.6	18.4	20.7	3.13	13.6	27.4	806	13.8	33.7	70.4
8.82	6.38	17.9	15.1	3.75	35.9	50.9	445	37.5	46.1	34.6
73	67.9	35.2	63.2	18.9	42.2	66.1	523	13.9	21.9	14.1
22.1	21.7	16.4	18.8	2.57	11.2	24.6	594	8.51	24.4	38.5
33.4	14.6	9.73	157	13.6	28.4	47.8	478	6.85	12.9	16.5
27.1	7.84	57.8	276	44.9	30.2	53.3	519	13.3	32.2	77.7
25.9	16.1	13.6	16.1	15.7	29.4	44.9	599	3.49	32.8	41
76.4	50.5	5.99	13.5	15	36.5	63.8	509	12.7	19.3	34.3
23.5	7.99	22.7	34.3	11.4	153	276	2017	5.67	35.5	39.6
20.5	8.43	20.9	23.3	8.66	33.4	54.2	311	9.56	21.1	25.5
30	17	29.4	31.9	5.05	13.8	23.7	267	14.2	30.5	27.1
27.6	9.65	5.62	10.4	8.35	38.9	73.7	1286	10.6	19.5	37.5
13.8	12.3	24.8	20.7	7.3	39.2	57.8	426	13.7	26.7	35.5
16.3	20.9	51.9	66.1	37.9	7.17	18.8	626	16.3	43.3	31.1
76.4	70.4	21.1	25.7	5.33	38.5	62.1	483	15.4	16.3	44.1
21.7	22.5	21.9	29.7	7.57	37.5	69.8	723	7.57	17.3	18.6
22.3	7.7	38.9	75	8.2	2.33	18.8	422	42.2	61.5	73
14.5	40	12.7	143	34	62.1	109	1144	9.56	24.8	40.3
61	42.6	18.1	27.9	4.66	10.3	16.5	337	37.5	73	119
30.8	23.1	74.3	410	65.5	77	163	1219	16.1	20.7	39.6
1	5	8.9	184	19.1	7.57	27.6	588	1.43	98.2	7.7
27.4	15.3	19.5	29.2	9.39	64.9	87.4	764	6.85	34.3	20.5
13.1	16.7	57.3	379	56.7	84.3	181	1486	10.4	25.3	30.8
20.7	7.77	23.1	55.7	12.9	93.9	176	1512	34.3	38.9	64.9
7.91	12.7	9.91	22.3	7.64	32.8	48.3	302	8.51	21.7	39.6
10.9	18.4	18.3	10.6	5.52	40.7	60.4	343	8.51	20.5	34.6
15.1	10.7	10.1	78.4	9.91	19.3	38.2	692	389	542	110
17.3	12.6	24.6	30	6.98	16.3	26.2	372	18.6	32.2	38.9
175	43.3	29.4	41.4	16.8	1.96	10.1	213	5.09	4.66	4.22
41.8	39.6	12	126	11.1	7.37	24.4	528	17.8	33.7	57.3
41.8	16.1	28.6	25	8.82	18.4	31.3	483	11.5	38.2	76.4
16.7	12.7	14.7	77.7	13.2	5.99	42.6	441	8.66	25.9	44.1
79.9	167	14.7	22.7	7.43	13.6	27.9	588	10.6	9.56	16.8
16.8	16.5	25	20.9	7.91	53.3	85.8	813	20.7	40.7	19.8
15.1	11.8	55.7	129	26.4	31.9	48.7	352	10.4	13.5	22.7
7.43	10.6	13.1	93.1	10.9	42.9	57.3	365	6.26	20.7	38.9
13.9	8.66	14.7	31.6	6.67	93.1	196	2414	10	22.3	24.4
17.3	16.1	13.2	14.7	5.62	12.9	30.8	621	20	42.2	76.4
25.9	17.2	17.8	13.9	4.07	25.5	27.9	382	11.3	23.7	47.8
7.37	14.1	34.3	32.8	9.31	23.7	40.3	610	30.5	60.4	114
20.4	16	54.2	86.6	42.9	99.1	170	1963	12.1	20.9	29.2
14.3	15.8	32.5	32.2	18.3	6.67	16.5	1000	11.1	17.8	36.8
19.1	13.2	24.4	147	14.6	66.7	93.1	757	12.6	43.7	82.8
94.7	50.9	26.4	48.7	13.5	64.9	117	2595	19.5	40.7	62.6
12.5	9.06	14.2	179	23.7	13	30	400	22.5	42.9	59.9
11.7	5.23	24.4	42.6	9.82	42.6	59.4	533	3.65	16.8	44.9
10.3	18.3	23.9	27.4	1.22	24.4	38.2	710	18.8	15	41
12.1	25	5.94	449	45.3	93.9	153	1568	4.29	47	6.49
21.3	13.8	45.3	422	49.6	167	279	2890	16.3	28.6	35.2
51.9	32.2	11.1	175	8.35	73	131	1263	13.9	31.9	32.8
26.2	12.4	21.1	24.4	4.96	114	244	1946	1.25	18.6	4.78
13.7	11.3	27.6	30.2	4.41	12.5	19.6	505	10.6	19.6	48.7
14.5	9.65	5.67	302	20.9	34	55.7	311	13.1	28.6	37.9
8.9	20	23.5	21.7	2.89	1.1	13.9	178	15.7	22.3	39.6
25.3	7.57	22.3	29.2	11	22.7	31.9	267	15.5	29.2	61
34	22.5	93.9	667	73.7	22.9	38.9	433	34.6	54.7	37.5
6.79	5.57	47.8	176	57.8	27.4	45.7	352	17	20	22.1
52.3	31.3	21.9	139	17.5	21.5	33.7	433	16.1	25	29.7
30	17.9	18.1	17.2	2.86	18.3	36.5	445	11.5	22.9	41.4
21.3	22.7	8.35	149	16.1	23.7	38.9	289	20.5	38.5	49.6
11.8	8.35	22.3	24.8	4.83	13.6	13.8	328	5.78	26.9	30
47.4	19.3	22.7	30.8	6.92	30	45.3	562	7.23	31.9	49.1
37.9	12.3	18.4	33.1	13.2	5.38	12.2	588	11.4	22.1	6.92
64.4	44.1	21.7	25.7	4.61	86.6	126	359	9.39	22.5	39.6
28.9	13.1	8.74	58.8	5	8.2	54.7	1094	38.5	113	142
95.6	49.6	23.1	30.5	6.55	22.3	37.5	491	5.52	11.8	33.4
29.4	47	9.47	196	27.9	33.4	52.3	426	44.9	88.2	161
98.2	71.7	18.3	23.1	7.5	28.4	49.1	422	11	22.5	37.9
145	133	40.7	389	73	29.2	34	389	10.4	16	49.6
72.3	49.6	27.6	19.6	8.74	43.3	98.2	2187	1	8.13	40.3
13.6	11.5	80.6	538	70.4	16.8	30.8	757	13.1	26.7	66.1
15.5	5.09	10	142	18.4	22.5	34.6	437	15.5	32.8	67.9
20.2	25.7	12.7	155	18.6	6.67	48.7	453	11.9	24.4	37.5
79.9	48.3	20.9	19.6	2.86	28.9	24.6	457	17.2	24.4	104
2.97	6.98	15.5	103	10.6	34.3	50.9	382	10.9	19.8	30.2
16.1	18.6	28.4	143	13.3	47.8	69.2	445	56.7	149	337
20	19.3	14.5	28.4	10.3	24.1	53.8	284	9.82	31.3	52.3
25.9	18.8	6.61	20.7	8.43	14.5	33.4	594	6.32	12.2	1
21.5	10.6	3.22	2.44	7.43	29.7	43.3	372	6.49	14.9	23.1
14.9	14.7	24.6	34.3	12.5	13.3	17.6	604	13.9	14.1	41
8.58	10.7	98.2	204	58.3	22.9	42.2	343	20.7	52.3	11.2
10.5	15.5	13.5	19.6	1.68	17.6	42.6	667	12.5	33.4	73.7
72.3	62.6	21.7	27.4	15.4	24.1	35.5	281	15	12.2	41
25.7	24.8	20.4	20.4	2.89	6.79	33.1	588	59.9	160	316
12.3	9.65	15.7	30.5	4.57	58.8	86.6	1554	17.2	36.2	31.1
22.9	35.5	16.5	14.9	5.28	53.3	86.6	567	10.4	33.1	24.6
12.5	13.2	10.3	23.9	5.05	86.6	131	1999	11.2	16.7	55.2
44.5	17.9	37.9	64.4	27.4	75.7	147	1065	12.3	19.6	21.5
16.1	26.2	20.2	18.8	5.94	23.5	36.2	379	26.7	40.7	67.9
12	6.15	17.3	44.1	8.82	59.9	93.1	604	15	31.1	49.1
15.8	11.7	19.3	17.8	7.7	47.4	117	2690	45.3	67.3	13.8
14.9	9.56	21.3	29.7	16.1	67.3	113	1241	33.7	58.8	164
24.8	34	13.3	18.4	6.92	27.1	46.1	858	10.7	34.3	39.6
14.2	13.2	11.9	100	5.19	37.9	57.8	757	11.8	19.1	40.3
62.1	47	15.4	22.7	5.78	36.2	49.6	461	12.2	19.6	37.5
10.5	6.98	23.5	35.5	5.23	32.2	53.8	851	14.1	20.2	78.4
