# Supplementary material
Source: ML conference proceedings conference paper supplement (https://openreview.net/forum?id=nrbR2F29vU)
Supplement: supplementary_material [file 9. b2camp.xls]

## Sheet: Sheet1
praf	pmek	plcg	PIP2	PIP3	p44/42	pakts473	PKA	PKC	P38	pjnk
24.1	1	13	403	84.3	20.5	21.5	255	1.63	84.3	1.36
19.3	1.01	19.3	112	37.2	64.9	61	276	2.37	137	1.2
3.43	1.96	9.22	183	22.9	10.5	15.8	632	19.5	36.2	1.12
16.4	1.01	48.7	385	113	9.39	23.9	704	8.9	15.8	1.14
29.4	1	15.5	30	17.5	8.43	18.4	340	18.4	61	6.1
36.8	1	30.8	225	85.1	13.1	13.7	248	1.14	414	2.05
19.3	1.01	22.3	239	38.2	26.2	26.2	337	1	3.11	1.09
42.2	6.49	22.5	21.9	16	15.5	19.6	241	1	82.8	1.24
54.2	4.83	58.8	55.7	19.1	124	181	3191	1	1	1
20	1	3.79	5.23	15.3	30	33.4	276	1	173	2.04
20.4	1	37.9	355	82.8	12.6	19.3	271	1	626	2.11
136	1	41.4	57.8	15.5	13.2	17.9	305	1	8.66	1
17.5	1.21	27.4	271	86.6	49.1	46.1	791	1.07	1	3.62
29.2	2.13	22.9	25.5	3.43	13	17.2	292	1	1.63	1.21
16.4	1.01	32.8	35.2	6.26	10.2	16.8	233	1	25.5	6.98
7.5	1.01	23.7	146	55.7	142	179	2839	1	59.9	2.69
28.9	1.27	33.1	14.2	62.1	79.9	95.6	1540	1	396	1.63
20.2	1.01	15.3	257	31.3	1	3.05	8.58	1.3	1	3.72
138	1.01	52.3	178	58.3	23.5	23.9	385	1	3.49	2.69
77	5.83	15	15.1	13.5	8.28	13.7	239	1	1.01	2.33
41.8	1.01	1	6.32	1.75	7.91	8.35	308	1	1.01	1.6
31.6	1.01	13.7	77	26.2	12.6	13.9	316	1	1	2.09
1	1	48.7	202	62.1	5.83	16.7	461	1	5.52	2.44
22.9	1	21.7	138	39.2	24.6	28.1	349	1.84	1	4.29
11.1	1.01	17.6	365	46.6	17.5	24.1	267	1	1.01	1.03
17	1.01	23.1	26.9	21.5	2.53	11.8	305	1.53	37.2	2.33
20	1	2.74	4.7	23.7	47.8	65.5	1446	1	27.6	1.5
57.3	1.01	71	204	130	5.88	9.73	403	7.17	21.5	5.42
20.5	1.01	8.74	27.6	22.5	7.1	10.4	257	1	1.75	1
30.5	1.25	40	34.3	13.5	20.5	22.7	334	1	246	1.51
28.4	1.01	35.9	231	73	7.91	20.7	343	1	1	2.19
42.6	1.13	3.43	89.8	9.91	79.9	84.3	1094	1	1.01	1
43.3	1	8.51	22.5	1	13.8	23.3	578	1	1.01	1.49
5.62	1.11	41.4	34.9	7.43	34.6	41.4	538	1	1	1.21
71	1	10.7	14.2	29.4	2.17	11.2	346	1	13.2	3.37
42.9	2.13	21.3	33.1	20.4	7.37	11.8	352	1	2.62	1.37
12.4	1.07	9.31	22.3	13.1	11.7	22.5	274	1	34.6	2.19
5.94	1	37.5	10.9	53.3	129	151	2227	4.29	36.5	2.81
16.8	1.22	52.8	457	101	6.49	15.1	349	1	1.32	1.55
39.6	1	33.7	621	142	2.94	15.7	562	1	11.2	2.53
22.9	1.42	14.9	34.6	30.5	24.1	33.7	433	1	113	1
25.5	1.01	24.4	26.7	46.1	20.7	26.4	302	1	7.84	1
15.7	1.01	41	49.1	25.9	40	56.7	890	3.19	11.7	1.64
21.3	1.01	2.11	11.8	9.82	16.1	25.9	426	1	6.32	1.47
40.3	1.03	23.9	62.6	20.9	9.22	19.8	334	1	1.01	1.96
36.5	1.21	28.9	30	11.4	5.09	22.5	235	1	1	1
27.9	1.01	18.3	233	74.3	11.5	12.7	250	2.37	1370	2.86
1	1.58	101	453	129	6.04	15.3	355	1.24	1	1
27.4	4.29	16.8	44.9	16	1.73	11.2	271	1.24	28.1	1.86
25.7	1.32	79.9	500	164	8.43	12.2	340	1	15.1	1
31.9	1.01	42.6	313	168	19.5	16.1	308	10.7	403	1.04
82	1.33	9.31	213	15.8	14.2	19.5	257	1	82.8	1.26
170	1	20.2	138	13.7	14.1	11.7	352	1	1	1.41
62.1	1	31.9	32.5	11.9	145	237	2813	1.07	1	1.19
16.3	1.2	29.7	119	37.9	12.5	11.3	235	1.21	93.1	1.93
26.4	1.01	4.18	1.91	939	24.1	28.4	337	1	1	1.79
40.3	2.11	18.4	115	25	12.1	19.3	281	2.92	38.5	4.49
21.3	1.01	20.9	48.7	21.3	24.6	24.4	372	1	1.83	1
52.3	1.01	16.5	29.7	23.1	8.9	17.3	343	1	7.1	2.27
20	1.01	25.3	27.9	1	10.2	15.1	239	1	3.52	1.01
29.2	1.01	15.4	41.8	24.4	11.3	27.9	429	1	71	1.27
29.7	1	26.9	26.9	31.1	26.7	34.9	308	1	44.5	1
30.5	1	17.8	188	48.3	12.6	12.6	311	1	422	1.57
76.4	1.36	8.43	4.83	1	10.8	17.6	355	1	4.07	1.01
40	1.01	6.79	9.47	3.62	13.1	11.8	389	1	1.55	1.54
44.1	1.01	28.1	22.5	10.6	21.1	37.2	445	1	8.98	1.88
37.2	1	11.5	18.8	25.3	34	35.2	319	1.06	1	2.39
70.4	1	9.65	18.9	23.9	10.1	14.7	244	1.01	1.51	1.01
37.9	1.01	7.17	21.1	20.2	1.5	10.3	615	1	1.01	1.5
33.7	1.15	32.5	496	103	17.6	25.3	334	1.21	8.98	4.83
61.5	1.01	34.3	457	73	25.7	26.4	365	1.08	1	1.86
34.9	1.01	117	882	255	41	75.7	1459	1.81	86.6	1.17
23.5	1.58	18.1	15.3	3.4	71	108	2091	1	2.5	1
25.3	1.03	10.9	40	16.7	75.7	68.5	316	1	1	1
39.2	1.68	22.1	191	30.8	4.96	17.5	396	1	1.86	1.31
38.9	1.2	8.74	19.5	15.1	79.1	97.3	1499	4.18	42.9	3.92
1	1.07	10.7	122	30.5	68.5	79.9	1094	1	16.1	3.11
32.2	1.01	20.4	89	31.9	5.09	25.3	403	1	5.62	3.52
35.9	1.01	7.43	17.5	19.5	13	16.8	368	1	11.1	1.83
52.3	1.01	7.99	16.3	9.39	18.8	33.4	519	7.3	76.4	4.78
14.7	1.01	23.3	33.4	23.7	19.1	20.4	294	1	126	1.15
31.6	1.01	34.6	40.3	34.6	16.8	21.9	422	1.21	154	1.33
35.5	1.01	14.7	20	11.7	7.84	10.7	257	1	1.43	1.95
34.3	1.01	36.2	45.3	34	6.32	9.31	244	1	1	2.69
41.8	1	71.7	410	202	12.1	30	1655	1	173	1.73
24.1	1.01	27.9	27.4	32.2	58.8	71.7	1322	1	2.41	2.11
71	1.38	24.1	150	46.1	13.7	17.2	276	1	1	1.73
86.6	1.01	41.4	279	66.7	51.9	69.2	851	1	1.09	1.47
143	1.01	16.1	122	26.7	15.1	43.3	1134	1	3.46	1
8.28	1	13.9	137	30.5	10	10.8	302	2.23	1	2.44
29.4	1.04	10.6	35.2	22.5	12	20.5	352	1	1	1
40.3	1.06	24.6	26.2	18.3	6.15	10.5	259	1	4.18	2.29
38.5	1.24	24.4	50.9	42.9	27.4	24.6	213	11.1	1197	14.3
38.5	2.07	15.8	22.3	20.9	5.67	20.5	615	7.99	172	6.98
26.4	1	93.9	820	195	84.3	92.2	1382	15.3	777	24.1
37.9	1.01	18.6	18.4	2.37	12.1	15.8	257	1.1	132	2.37
27.9	1.01	20.5	20.2	9.31	19.6	28.1	292	1.27	12	1.79
31.9	1	21.9	14.1	10.8	3.59	15	426	2.64	108	1.3
227	1.01	5.57	15.4	3.75	8.98	11.1	385	1	161	1.37
34	1.01	11.1	154	28.1	63.2	67.9	1512	1	1	1.57
32.2	1.33	10.6	25.7	6.38	3.22	5.33	392	1	1.01	2.59
4	1	64.4	362	209	79.1	111	1715	1.08	21.9	1.88
36.8	1.17	82	253	155	7.3	13.7	331	1	15.5	2
36.5	1	29.7	30	19.5	12.5	12.2	246	1.86	103	2.84
173	1	5.83	11.3	11	22.3	27.6	322	1	17.3	1.27
35.9	1.01	14.3	85.1	25.7	6.32	9.82	262	16.5	4.7	1
84.3	1.36	12.3	200	42.9	3.85	11.1	264	1	1.36	2.84
38.9	3.89	18.6	77.7	22.1	5.99	30	644	1	10.2	1.14
30.5	1	31.3	99.1	14.5	2.69	6.92	313	1.51	2.04	1.41
31.3	1.01	54.2	189	94.7	22.1	31.3	221	1	11.2	1.84
35.9	1.27	19.5	105	19.1	13.2	16.3	418	3.82	167	2.41
38.2	1	23.9	21.3	10.3	13.1	17	449	1	74.3	1.3
48.3	1.01	13.1	289	58.8	150	259	3078	9.06	106	19.5
17.8	1.98	41	51.9	42.2	12.3	16	246	2.13	17	1
34.6	1.01	8.51	244	22.7	196	215	2167	1.81	2.41	1.29
35.5	1	35.5	115	54.7	13.5	22.5	368	1	1.21	2.25
33.4	1.01	35.2	34.6	28.6	7.57	12.4	241	1.49	42.9	3.72
9.91	1.07	8.06	10.8	16.7	7.7	10.6	372	1	15.4	1.31
45.7	1.01	23.7	83.5	46.6	33.4	42.2	1018	1	13.1	1.33
44.9	1.01	27.1	35.5	17.2	5.67	7.23	259	1.91	1	1.39
39.6	2.59	51.9	85.1	122	22.3	67.9	1322	1	2.04	1.39
88.2	1.01	14.1	259	25.3	8.58	13	248	1.02	2.5	1.93
3.55	1.06	25.3	17.8	13.7	3.08	18.8	157	1	217	1.15
30.5	1	11.9	173	34.6	58.3	97.3	1731	1	110	2.48
92.2	1.13	59.9	66.1	47.8	2.05	7.3	85.1	1	1	1.25
160	1.21	18.8	24.4	3.79	15.7	18.1	352	1	1	1.07
1.5	1.35	18.3	21.9	19.8	10.9	17.3	362	1	20.4	1.01
26.4	1	24.1	13.9	12.1	10.7	31.3	956	1	48.7	1
2.76	1.35	15	107	30.8	8.9	15.1	331	1	1	1
22.1	1.42	19.8	109	20.5	9.22	13.6	286	1	1.01	1.2
41.8	1.01	26.9	62.1	13.6	3.72	6.61	313	1	8.9	1.04
32.2	1.01	47.4	115	57.3	9.39	12.6	422	4.07	3.52	1.55
34	1	7.37	16.1	12.7	11.9	17.5	267	3.96	9.82	1.11
25.5	1.42	82	77	39.2	20.7	16.1	269	7.64	85.8	2.07
36.5	1.06	26.7	19.8	13.5	22.1	20.9	334	33.4	1433	3.89
10.6	2.44	27.1	58.8	19.5	24.1	23.5	322	9.82	19.3	4.57
67.9	1.01	8.51	149	47	41.8	40.7	334	1.24	36.2	3.59
39.6	1.01	23.7	20.4	5.52	86.6	108	1811	1	1.18	1
37.9	2.27	32.5	319	59.9	59.4	72.3	1018	1	1.91	1.01
24.4	1.1	24.8	22.7	15.5	15.5	15.4	325	1	1	2.35
35.2	1.12	17.3	241	46.6	9.73	19.6	331	1	1.64	1
31.1	1.61	23.9	26.4	9.14	6.44	15.7	453	1.12	71	1.06
39.2	1	28.4	22.3	3.43	10	14.5	255	2.37	34.6	1.1
2.74	1.01	22.9	21.3	11.1	1.73	15.1	322	1	2.48	1.79
33.7	1.37	9.56	204	31.3	7.77	14.9	403	1	12.6	2.48
47.4	1.01	23.7	24.1	11.8	16.1	18.9	343	1	18.6	16.4
34.6	1.33	79.1	178	50.5	4.61	16.8	644	1	349	1
38.9	1.5	20.4	25.7	17.8	15	16.8	375	12.7	237	12.6
64.4	1	25.7	123	31.9	10.6	19.1	316	1	1	1
32.5	6.32	38.2	21.7	3.72	41	48.7	649	1	6.73	1.27
34	1	23.7	32.5	21.3	3.65	25.9	300	1	5.57	1.42
22.3	1.04	5.94	9.14	7.57	24.6	25.7	414	1.08	1	1.89
129	1.01	37.5	34	35.9	21.1	28.9	274	2.02	8.35	1.35
21.3	3.08	17.9	151	31.9	16.4	19.3	362	2.29	25.5	6.92
42.6	1	18.8	181	30.8	22.7	28.6	311	1	1.49	1
71	2.37	20.4	28.1	8.06	106	103	313	1	1.01	1.61
8.06	1.84	61	547	157	5.33	16.3	289	1	5.19	1
17.9	1.45	28.4	17.3	12.2	22.9	30.5	422	1	2.71	1.01
101	1.01	22.9	20	11.7	107	125	2458	1	1	1
35.2	1	17.8	26.4	7.77	7.91	18.8	389	1.76	43.3	4.14
18.1	1.13	10.9	244	27.4	30.5	33.1	286	1	1	1.5
35.2	1.47	84.3	196	43.7	15.3	23.9	340	1	121	1.76
37.5	1.38	16.5	28.1	11.4	4.07	18.3	403	1	50.9	2.17
106	1	24.1	26.2	24.1	6.73	16.1	355	1	80.6	1
29.7	1.89	27.1	30.5	20.5	4.49	20.2	407	1	1.01	1
24.6	1.78	72.3	449	141	15	13.9	289	1	2.04	1.93
33.1	1	25	27.6	21.5	13.3	16.7	269	1	1.83	2.76
48.7	1	48.3	97.3	24.4	8.66	12.6	289	1	5.88	1.64
36.8	1.01	15.4	15.5	4.29	30.8	39.2	757	1	195	3.05
250	1.01	20	44.5	17.9	27.6	39.6	626	1.84	1	1.32
95.6	1	10.5	22.5	23.5	4.7	11.4	445	1.86	31.3	2.37
55.2	1.01	11.4	215	47	16.8	18.8	375	1	1	2.09
11.2	3.05	26.7	26.4	13	8.66	11.7	453	1	4.18	1
7.17	1.01	2.76	15.5	4.57	7.23	16.8	355	1	1.01	1.46
38.5	1	35.5	60.4	44.1	7.84	7.3	286	1	4.53	2.13
24.6	1.3	41.8	215	91.4	34.9	34.6	284	1	12.2	1.72
53.8	1	23.7	101	22.1	3.02	15.3	352	1	2.09	1
83.5	1.01	30.8	23.1	15	71.7	73	947	1	17.2	1.76
118	2.46	36.5	66.1	8.66	7.5	50.9	704	1	1208	1.76
43.3	1.09	17	17.6	1	4.07	46.6	135	1	1	2.44
34.9	1.02	21.7	12.3	7.5	29.7	35.2	294	1	1.36	1.32
37.9	1	9.56	229	29.2	131	123	843	1	286	2.53
33.1	1.01	28.6	343	84.3	6.26	7.64	300	1	129	1.45
25.5	1.01	40.3	392	115	18.9	25.3	359	1	14.7	1
31.6	1.02	9.73	13.3	11.4	58.8	64.4	890	1	25.3	1.08
32.8	1.7	17.9	130	37.5	23.1	21.9	308	1	1	3.43
26.7	2.23	9.82	118	21.1	4.57	10.7	667	3.13	322	7.1
44.9	1	9.14	147	28.6	28.1	32.2	316	7.17	392	10.3
79.9	20.5	36.5	18.9	13.9	16.7	19.3	343	1	1999	2
35.2	1.03	22.7	26.9	10.4	7.7	13.7	281	11.9	1.41	1
9.73	1.01	15.5	26.9	9.82	9.14	14.3	292	1	1	1
36.5	2.25	17	27.6	8.9	91.4	120	1358	1	6.26	2.92
14.5	1.95	22.1	106	22.7	69.2	74.3	1407	1	6.1	2.05
181	1.01	25.9	22.7	23.7	20.5	38.2	621	1	1	2.31
21.1	1.37	16.4	161	16.4	4.66	10.4	379	1	107	1.58
217	1.27	25.3	18.9	15.7	77	95.6	1286	1	2.09	1
44.5	1.1	18.4	21.5	1.17	31.6	28.6	858	1	108	2.31
29.7	1.26	17.9	137	42.6	23.3	41.8	626	1	1	1
111	1.26	33.7	29.4	14.6	3.34	12	213	1	7.5	4.7
45.7	1	29.2	150	36.8	65.5	93.1	1999	1	4.37	1.95
15.4	1.95	20.5	235	25	17	27.1	403	1	10.6	1.5
39.2	1	22.9	15.4	6.61	23.5	21.7	325	1.91	1.01	1
36.5	3.52	25	69.8	8.35	13.2	25	328	1.12	289	1.41
36.2	1.01	17.6	21.3	20	10.2	14.5	286	2.09	165	1
62.6	3.08	9.82	155	40.3	23.3	30.2	457	1.7	8.9	1.76
132	7.43	16.8	173	48.7	6.73	9.73	337	1	4.41	2.48
12.6	6.04	17.3	35.9	29.4	82	105	1685	1	2.59	2.39
223	1.01	16.1	213	33.7	17.9	23.5	331	15.7	26.4	3.96
38.9	1.21	27.6	44.1	13.3	14.9	28.1	372	2.46	105	3.72
45.7	2.09	13.9	89	24.8	77	79.9	1084	1.22	1	1
23.7	1	26.7	29.7	6.98	1715	1715	1197	2.09	30.8	2.64
41.4	1	24.6	14.7	16	6.04	12.3	246	2.48	1.25	1.79
47	1.19	26.7	35.9	43.3	34.6	41	704	1.09	279	1
22.9	1.22	30	13.3	15.5	18.3	25.7	379	1	1.01	1.47
36.8	1	24.8	26.9	14.1	22.5	22.7	289	1.38	478	12.3
44.1	1	8.28	10.7	12.1	12.3	21.7	355	1	1.76	1.25
42.2	1	18.8	24.1	19.1	7.91	10.6	368	1	1	1.6
24.1	2.62	34.9	141	36.5	45.7	51.4	799	1	12.5	1.83
101	1.73	27.6	40.7	10.8	7.99	11.8	325	1	18.4	1.42
29.4	1.01	16.1	164	15.3	59.4	75.7	1124	9.65	1	1.2
12.7	1.46	26.7	34.3	19.6	13.9	11.4	284	3.43	9.06	2.35
32.2	1.01	26.4	21.1	20.4	21.5	21.9	359	1	28.9	1
125	7.17	33.1	57.3	24.8	105	106	1334	1	1	1.84
68.5	25	21.9	153	28.6	97.3	136	2148	1	1.45	1.64
26.9	1	20.7	91.4	37.2	4.18	19.3	562	1	164	1.89
29.4	1.83	27.1	19.5	38.9	20.7	18.3	219	1	30.2	1.83
28.1	1.63	45.3	37.2	32.8	18.6	20.5	343	1	1.3	1.39
35.9	1.19	28.1	34	18.9	10.6	13.2	237	1	1.01	1.27
26.9	2	16	59.9	16.7	67.3	76.4	1843	3.92	16.7	25.5
37.9	1.15	21.3	10.7	16.5	18.8	27.6	286	4.49	1	2.79
36.2	1	23.5	26.2	6.38	63.8	95.6	1568	1	75.7	1
36.5	1.98	20.7	146	35.5	21.3	24.8	308	9.56	7.99	4.37
20	1.01	19.1	18.4	2.59	15.7	20.7	349	1	1	1.25
21.9	1	19.3	139	24.1	14.3	23.9	835	1.06	28.1	1.83
67.9	1	17.8	130	25	7.37	15.3	311	1.31	10	1
28.9	1.32	28.1	297	38.9	4.07	10	426	1	1	1.01
16.3	36.8	30.2	35.2	9.82	20.7	37.5	1134	1	1	1.81
61.5	1.01	20.5	17.5	8.28	47.4	51.9	1144	17.5	2267	15.5
19.5	2.92	28.9	151	42.2	3.52	23.1	426	1	12	1.45
215	8.9	19.5	96.5	21.7	49.6	56.2	1134	1.15	2.17	1.55
28.9	2.94	25.3	22.9	17.9	95.6	105	1981	4.1	1	3.92
50.5	1	27.6	31.6	23.9	83.5	99.1	1382	43.3	379	14.5
46.6	1.57	4.37	1.49	382	20.5	38.5	483	1	1	1.01
8.06	1	15.1	164	32.5	6.49	11.9	204	1	1.01	1.3
24.6	1.11	6.73	14.5	29.7	7.3	18.1	313	1	1.03	1.3
27.9	1.61	4.66	7.84	17.3	2.57	9.31	737	2.94	340	5.67
40	1.01	16.3	136	11.4	18.1	21.9	334	10.1	1611	17
189	15.4	14.2	331	50.9	4.87	17.2	346	12	135	12.2
26.7	1	11.5	179	46.1	2.46	7.64	257	1	122	1
1	1.45	10.1	14.6	13.2	13.6	10.4	279	1	11.7	1.31
56.2	1	28.1	97.3	38.9	19.6	18.4	257	1	1	2.53
64.4	3.13	44.9	147	35.2	4.83	1.08	101	1	1	1.47
75	1.01	25.7	48.3	15.8	15.3	22.3	355	1	1.01	1.2
129	1.68	41	39.6	13.3	6.15	18.8	461	8.58	219	6.79
5.28	1.01	4.37	10.3	13.9	4.18	23.1	621	1	1	1.95
25.7	2.09	48.3	85.1	34.3	11.3	13.8	255	1	1.67	1
49.6	1.01	30.2	47.4	19.8	18.3	16.5	331	1	1.01	1.13
42.6	2.25	67.9	505	149	18.4	28.9	334	1	9.39	1.26
20.5	2.59	16.5	89.8	23.1	37.2	39.2	328	1	1	1.95
37.2	2.62	8.58	17.9	13.7	63.8	75.7	1208	1	102	1.24
33.1	1	5.88	149	27.6	10.7	22.3	573	17.2	91.4	7.17
22.5	1.72	20.5	112	31.1	3.22	7.1	346	1	1	2.92
49.1	1	23.5	95.6	26.9	15.5	28.1	269	1	1	1.17
34	3.55	22.9	30.5	8.51	85.1	103	1715	1	3.55	1.21
49.6	1.09	27.6	21.9	7.84	10.6	15.4	204	1	1.45	1
77.7	2	10.7	331	45.7	15.5	20	276	1	1	1.81
31.6	2.89	25.3	92.2	22.9	5.67	8.74	264	14.5	264	1.12
47.8	1.95	14.3	94.7	26.4	29.7	30.2	389	1	15.5	1.72
31.6	2.69	21.7	16.7	2.05	4.41	26.9	389	1	233	1.47
41	1.7	26.7	18.3	10.6	36.8	33.4	264	1	5.83	1.33
16.7	2.39	30.5	34.3	40.7	13.9	13.9	308	1	1	1
16.8	2.37	18.3	217	64.9	5.05	14.2	542	1	1	1.03
104	1	18.4	56.2	10.4	10.1	13.9	262	1	1	2.37
29.2	2.09	30.5	58.8	46.6	42.2	48.3	851	9.39	193	1.08
40.3	1.22	16	164	30.8	23.3	32.5	483	1.73	1	2.02
41	1	11.5	122	31.6	35.2	31.1	392	2.31	319	1.32
54.2	1	12.2	108	36.8	81.3	118	1928	3.72	26.4	1
26.4	1.01	12.7	101	25.9	21.9	30.5	392	13.3	2996	18.9
34.9	2.15	15	23.3	3.55	56.2	73.7	1037	1	3.79	1.63
34	2.29	12	25.9	8.43	53.8	85.1	1346	1	3.19	2.19
25.9	1.65	26.9	161	26.2	11.7	28.6	764	1	1	1.17
75	1	17.9	204	46.6	6.21	10.7	297	1	9.91	1
4.14	1.32	18.4	18.6	15	7.5	9.39	334	1.75	1	1.55
117	6.92	21.9	23.3	12.5	80.6	110	1999	1	1.18	1.58
35.9	2.81	15.4	138	42.6	15.7	20	319	1.15	1	3.13
89.8	2.23	16.8	173	23.9	11	13.6	253	1	157	1.43
13.9	2.48	66.1	264	95.6	8.98	11.9	362	1.83	14.3	1.37
44.9	1.31	31.1	55.7	31.9	8.58	13.5	500	2.46	4.83	1.15
24.4	4.22	13.8	77	40.7	24.6	24.8	372	1	147	1.41
9.39	4	23.3	30.5	25.3	17.9	22.5	279	1	1	1.65
26.2	3.19	26.9	30.8	31.6	12.6	14.2	286	1	10	1
33.1	1.88	10.5	244	22.3	9.65	13.6	407	4.49	382	8.9
52.3	5.99	15.4	1.61	16.7	12.4	14.7	233	1	64.9	1.63
1.18	1.57	22.5	143	47.8	17.8	23.1	257	2.81	80.6	1
191	13.9	32.2	45.3	13.9	9.56	18.1	346	1	3.72	1.19
1	2.48	18.9	60.4	17	1.91	1	56.7	1	11.5	1.15
35.2	2.07	21.7	84.3	20.2	12.1	38.2	1928	1	6.73	1.7
77	1.05	24.4	15.3	1.22	18.8	31.1	352	1	153	4.7
9.65	1.2	84.3	21.5	80.6	4.87	11.3	583	1	202	2.29
44.9	2.57	87.4	599	168	33.4	44.1	1310	1	4.49	1.13
42.9	4.41	20.9	16.7	6.44	40	33.7	313	1	1.18	1.19
57.8	1.51	11.1	229	37.2	8.9	16	313	1	1	1
43.3	1.38	31.6	71	18.1	24.6	35.2	445	1.45	58.3	1.63
46.1	1	17.8	136	31.1	10.1	9.73	433	1	104	1.65
112	7.04	60.4	410	89	9.22	17.8	302	1	422	3.52
58.3	1.58	24.8	61	18.4	196	284	4573	1	3.49	1.53
23.7	3.34	28.9	29.4	10.9	42.2	48.3	649	1	10.5	1.76
18.1	1	23.1	12.6	7.43	21.3	23.5	279	1	17.9	8.66
30.5	1.01	16.8	40.3	25	14.1	24.6	274	2.79	21.7	1.36
25.5	3.16	26.7	83.5	29.2	23.5	27.1	274	1	136	7.3
31.1	1.3	3.59	22.9	35.5	20	19.6	359	1	1	1.38
25.3	2.25	14.7	198	23.5	75	90.6	1186	1	1	1.57
33.1	2.46	29.4	24.8	4.96	12.5	17.9	300	1	10.5	1.32
38.9	1	25.9	115	30.5	15.4	36.5	583	1	1	1.81
66.7	8.06	21.9	6.1	9.82	66.7	82	1009	1.54	90.6	1.98
44.5	5.78	14.7	108	30.2	5.05	11.3	281	1	308	1.65
56.7	1.86	4.22	6.21	20	4.1	26.2	437	1	6.98	1
40	1.88	20.9	13.3	19.5	17.5	23.9	346	1	2.27	1.19
26.9	2.64	12.5	178	29.4	5.83	6.92	281	1	1.07	1
16.4	9.65	25.7	37.9	14.6	24.1	25.7	355	1	1.01	1
139	6.92	15.4	115	16.1	7.7	17.8	474	2.37	9.56	1.13
35.9	5.83	25.7	28.6	12.7	28.4	30.8	334	1	1	4.49
50.5	1.01	19.3	13.7	16.4	19.6	20.7	281	1	1	1
31.6	1.7	21.9	26.2	16.4	26.4	32.8	279	1	4.91	1.64
51.9	1.03	89.8	542	150	18.8	25	281	3.75	1.11	1.5
39.2	1.55	19.8	155	15.8	14.1	18.6	316	1	1	2
54.7	1.01	18.6	250	38.2	22.1	20.5	325	1	1322	47.4
46.6	1.01	20	17.5	19.1	8.35	19.8	311	1	1.75	1
21.9	3.62	8.9	389	72.3	9.73	13.5	368	1	7.91	1.22
33.7	1.46	17.9	23.9	17.9	7.43	13.1	346	1.58	1.26	1.7
4.1	1	20.2	19.8	12.3	41.8	76.4	1055	1	3.52	1.76
38.9	1.6	27.4	18.1	2.05	16.7	18.9	368	8.2	300	1.11
31.1	2.5	20.5	160	21.3	15.4	24.6	244	2.81	302	8.58
56.2	15.1	13.8	143	23.5	5.88	12	253	1	13.7	1
58.3	1	9.91	19.5	24.1	22.7	32.2	264	3.59	2.81	1.43
37.9	1.01	29.4	22.9	19.8	36.8	53.3	1186	1	11.8	1.96
29.2	3.25	14.7	126	11.5	12.5	15.1	337	1	4.41	2.13
26.2	1.72	62.1	457	121	2.64	18.4	157	1	1.01	1.68
25.5	2.31	12.7	64.4	23.1	7.84	6.79	300	1	1.5	1.72
34.3	1.17	13.2	165	25.5	19.6	23.1	292	1	1	2.29
1	1.32	14.5	17.3	18.1	1.38	1	117	17.2	1811	6.73
29.4	2.69	8.98	109	43.3	8.2	16.4	233	1.05	6098	25.9
79.9	27.4	10.9	193	42.9	24.8	34.3	407	1	2	1
50	1.58	11.4	131	22.5	22.7	29.2	723	1	1.38	1
30.5	2.41	20.7	54.7	22.5	10.4	13.7	308	1	1.22	1.89
25	5.57	21.7	35.2	23.5	34.9	38.5	410	3.72	1	1.58
28.6	2.86	23.5	28.4	11.5	32.5	36.8	337	4.91	16.4	7.1
36.8	1	20.5	26.9	15.5	12.6	16.1	496	1	25.5	1
21.7	1.67	43.7	60.4	40.3	29.2	39.6	400	1.5	10.4	1.49
138	1	16.4	204	27.1	10.2	28.4	396	1	4.57	1.43
77.7	1.2	12.1	131	23.3	71.7	115	1670	1	1	1.15
14.6	1.37	14.3	302	37.9	76.4	123	1275	1	13.6	1.63
27.6	1.41	18.8	117	40.3	5.73	10.2	578	28.9	10.2	1.65
36.8	1.93	37.9	29.4	26.7	15.8	22.3	331	1	3.37	1
35.5	2.27	22.7	16.8	4.1	53.3	69.2	717	1.61	19.8	1
2.23	2.71	10.2	40.7	50	21.9	29.2	403	25.7	505	9.22
29.4	10.1	31.1	32.2	8.35	82.8	95.6	1582	8.28	3.43	1
130	47	9.31	157	31.9	33.4	54.2	685	1	8.06	1.01
2.86	1	21.9	319	59.4	11.4	17.6	375	1	18.3	1.24
50	6.26	10.4	117	34.6	12.4	15.4	207	2.97	167	3.02
38.9	1.01	31.1	27.1	26.7	4.7	31.3	331	1	1	1.12
10.1	1.04	9.56	219	53.8	14.1	19.6	433	1.47	1	1.75
11.1	1.65	25	14.6	1.49	76.4	83.5	1407	1	1.41	2
66.1	1.01	9.47	19.6	33.7	15.7	16.5	235	1.58	6.38	1.49
52.8	25.3	32.8	21.9	9.22	15.8	20	346	1.06	1	2.05
28.1	1.38	51.4	322	120	6.98	17	355	1	221	2.19
94.7	5.38	22.7	21.9	4.66	5.83	7.99	248	1	1	1
36.5	1.55	31.3	29.2	17.5	14.9	13.7	262	1	1	1.37
44.5	4.7	30.8	91.4	22.7	2.02	5.94	692	9.47	1582	4.1
46.6	1.01	19.6	14.3	1.78	11	16.3	246	19.6	973	14.9
16.7	4.37	14.9	178	40.3	10.2	10.7	368	1	1.01	1.83
43.7	2.39	38.2	382	131	15.4	20.7	292	1	11.8	3.65
46.6	1.38	12.7	21.1	24.8	16.7	25.9	297	1.6	3.59	1.83
28.4	2.23	20.5	136	38.5	13.2	20.2	382	14.5	5.33	1.01
58.3	1.01	16.8	16.7	13.3	13.2	12.5	271	3.52	2.44	1.29
35.5	1.01	35.5	200	65.5	13.3	9.31	319	1	7.57	1
4.1	6.98	15.1	14.2	7.64	8.82	12.4	308	1	10.9	1.39
40.3	1.25	16.5	37.5	17.3	10.1	17.5	175	1	1.38	3.22
50.5	2.37	10.6	269	33.4	12.5	8.98	281	1	4.22	1.21
38.5	1.01	17.5	167	28.9	60.4	62.1	965	1.81	1	1.7
2.53	1	20	98.2	22.7	23.3	31.3	311	1.36	1.19	1.32
10.9	4.96	14.3	16.1	20.7	11.3	17.6	284	2.92	1	2.92
61.5	1.78	132	241	136	15.1	18.6	276	1.49	2247	2.15
38.5	2.07	19.6	80.6	23.1	15.3	21.7	292	1	500	4.49
50.9	2.15	29.2	21.7	38.9	18.6	25.9	407	1.45	111	11.9
113	1.01	20.7	23.9	16.3	9.31	15.1	289	1	61	1
50	1.01	10.9	8.82	18.9	29.7	32.5	292	1	13.3	1.38
36.2	1.01	20	28.6	8.9	5.09	15.3	449	1.05	5.62	4.49
44.1	3.52	15.7	115	35.9	5	12.6	704	7.84	12.7	2.76
5.38	4.1	49.6	414	73	12.5	17.3	284	2.81	1.01	1.33
47.8	1.01	15.5	123	36.8	11.5	17	319	1	1.01	1.11
49.6	1.89	30	24.8	5.14	14.1	16	241	1	1	2.5
168	1	23.7	27.1	17.5	2.94	15.4	604	1	48.3	1
30.5	1.76	33.7	35.2	33.7	12	67.3	2350	1	1	2.25
38.2	1.11	11	227	37.9	4.26	36.5	77	1	1	1.63
4.83	1.35	29.2	10.4	4.49	4.33	9.39	331	1	100	1.08
26.9	1.36	20.2	105	36.2	2.19	8.28	851	1	1.53	1.01
64.4	1.01	6.49	168	37.5	14.1	20.5	244	1	13	1.1
27.1	3.25	14.6	13	10.7	29.2	32.8	396	10.3	1.72	1.05
23.1	1.72	21.9	136	53.8	9.47	13.5	359	1	102	1.15
30	4.96	22.9	22.9	11.2	5.14	24.8	533	1	4.37	1.07
38.2	1.01	28.4	15.7	17	3.72	34.9	59.9	1	1	1.3
42.9	1	38.9	18.6	30.2	8.13	11.7	286	1	1.01	1
105	1.01	17.9	217	57.3	33.7	42.9	632	1	138	1.79
35.5	1.81	14.1	184	24.1	17.3	31.1	396	1	1	1.01
5.42	1	23.9	14.1	16.4	15.8	16.4	294	1	1	1
53.8	14.3	4.26	5	4.26	20.4	22.7	337	1	1	1
26.9	1.01	22.1	6.32	18.4	2.67	9.91	184	1	1	1.21
13.2	1.31	23.7	78.4	33.7	25.5	33.1	241	2.15	523	2.59
63.2	4	19.3	22.5	6.1	17.6	28.9	931	1	136	1.93
35.2	1.84	14.1	3.46	14.6	2.46	6.79	478	1.26	1.13	1.11
3.22	1.46	22.7	22.1	11.4	50.9	71	874	1	1	1.01
34.3	1.76	6.67	18.8	14.3	27.9	43.7	552	1	8.06	1.01
35.2	2.55	26.7	16	5.14	6.44	1.2	142	6.55	6.21	1.25
24.1	2.35	36.5	46.6	37.5	29.2	37.2	851	8.2	276	1.25
47.4	1.67	66.7	311	100	3.92	16.8	505	1	43.3	1
46.1	2.97	20.5	21.9	1	11.5	20.4	583	1.09	7.99	1
35.2	4.57	10.6	188	32.8	42.6	53.3	626	1	1	1.79
47.4	3.43	22.9	111	30.8	54.2	72.3	1219	1	4.7	1.54
100	1.21	12.4	155	43.3	10.4	16.3	269	1	25.9	1.58
30	3.68	16	12.9	18.4	19.6	20.7	382	1.81	1.72	3.59
49.6	9.39	16.7	217	31.3	18.3	26.9	279	2.09	1.39	3.05
56.7	2.17	2.5	12	22.7	10.9	22.7	890	2.92	30.2	2.05
45.3	3.68	7.23	111	21.9	7.57	62.6	557	1.78	1	1.42
38.9	2.31	41	410	80.6	20.4	25.9	302	12.6	302	6.1
38.9	2.62	13.8	204	41.4	26.7	34	692	2.04	22.1	4.1
33.7	4.7	49.1	362	98.2	11.9	16.3	346	1	3.34	1.45
1.39	1.6	20.5	18.3	1.65	33.7	35.5	441	1	1.36	1.6
32.2	3.46	23.1	16.8	10.4	8.13	16.5	346	1	1.63	1
42.9	4.57	25.5	12.9	8.06	31.1	38.9	882	1	1	1.43
10.4	1.01	19.6	55.7	11.5	1.93	7.3	655	1	1	1
21.9	2.53	23.9	20.5	1	22.3	21.1	279	1.02	2.92	1.32
34.3	1	12.6	138	13.1	34.9	48.7	2148	1	77	1
37.9	2.07	72.3	644	141	36.2	40	698	1	158	1.32
32.5	4.29	21.7	161	32.2	63.8	89	1911	1	38.2	1.89
108	1	11.1	127	26.4	14.6	20.7	286	1	45.7	1.15
61	1.1	19.8	15.8	5.38	44.1	52.8	947	1	4.1	1.49
31.1	1.06	63.8	77.7	38.9	40.3	42.9	302	1	14.9	1.25
58.3	2.19	79.1	514	136	35.9	47	692	12.9	1018	1.57
44.1	1	47.4	84.3	64.4	13.7	23.9	284	2.17	37.5	4.07
30	3.28	15.7	47	40.7	19.8	17.3	274	1	17.9	1.54
38.9	2.21	14.5	179	17.3	33.4	76.4	1094	1	1	1.53
44.1	1.01	13.5	9.56	3.85	13.1	19.3	389	1	1.05	2.27
44.5	1.05	7.17	23.5	4.66	13.8	16.4	319	1	6.79	1.58
124	1	55.7	244	75.7	21.5	25.5	375	2.57	4.78	10.9
36.5	1.01	20.9	32.5	16	77	103	2371	1	9.06	1.55
111	1.01	91.4	259	97.3	31.3	31.1	340	1	142	1.54
34	6.55	2.64	10.3	8.2	9.91	16.4	400	1.3	4.83	1.18
32.5	3.65	14.5	157	20.5	22.5	27.9	365	1	1	1
29.2	1.01	11.7	29.4	21.3	5.42	26.2	470	1	1.18	1
15.3	7.91	16.8	130	20	10.7	16	271	1	250	4.14
14.5	2.69	18.4	137	48.7	12	13.3	334	1	85.1	10.6
82	1.35	14.9	137	35.5	14.9	17.8	334	1	3.59	1
85.1	3.4	11.4	213	20.4	5.78	10	396	1	2.84	1
14.1	1	22.1	79.1	13.3	7.91	10	368	2.05	1843	1.09
39.2	1.65	20.9	155	49.6	27.6	36.2	385	4.91	9.56	7.57
131	5.99	18.3	16.8	7.04	12	12.2	276	4.87	227	2.46
23.3	1.04	15.7	205	49.6	12.2	18.1	334	1	1	1
32.8	1	22.9	31.9	20	28.4	43.7	737	1	1	1.17
40	6.26	15.5	106	9.91	19.6	28.6	385	1	1.01	1
39.2	3.62	22.3	26.7	21.5	7.04	25	437	1	10.3	1.15
29.2	1.29	21.7	23.3	15.1	4.29	6.21	426	1.84	1	3.72
66.1	1.01	20.9	7.64	24.1	3.75	17.5	457	8.43	125	1.08
58.3	1	14.2	129	38.5	19.8	26.4	331	1	147	2.84
29.7	1	12.5	92.2	17.5	26.2	41.8	1144	4.18	41.8	1.61
42.2	1.88	16.4	22.3	20.4	2.39	10.1	217	1	99.1	1.42
36.5	1.04	24.1	6.44	28.9	15.7	17.3	300	1	1	1.68
58.3	10.2	16.7	26.9	24.8	6.92	13.6	1065	7.37	400	5.88
36.2	2.27	14.2	200	36.8	6.85	16	491	1	5.78	1.17
50	1.06	25.5	27.4	3.68	10.2	13	292	2.33	12.3	1.53
30.2	2.05	19.1	21.9	14.6	40	56.2	1134	1	5.88	1.79
53.3	1.53	46.1	379	102	38.5	55.7	392	5.19	588	2.35
46.1	2.44	39.6	362	66.1	4.07	8.58	233	5.28	2.35	1.1
8.66	1.01	10.2	10.6	14.5	2.59	12.3	248	22.1	72.3	4.74
31.1	2.86	25.9	17.3	12	16.7	18.1	349	23.1	692	10.7
24.8	4	23.9	27.6	23.7	64.9	67.3	305	1	1	1.12
54.2	1	1.5	23.9	16.1	34.9	41.8	355	12.5	483	1.06
46.6	1.73	11	133	25.5	11.8	13.2	246	1	105	4.45
30.8	1	20.9	196	38.9	57.8	62.6	743	1	1	1.6
22.5	1.36	17.2	241	28.4	7.99	45.7	403	1.19	31.6	1.38
124	4.91	27.4	219	67.9	52.3	71.7	1065	1	1.01	1.72
49.1	1	16.3	175	24.8	106	121	1298	1	1155	1.64
68.5	3.02	23.1	27.1	13.2	11.4	17.8	461	1	11.9	2.35
59.4	1.01	9.31	281	30	23.7	25.3	349	1	1.01	1.25
6.21	2.11	9.82	127	25.5	14.3	29.4	466	4.29	25.5	1
35.2	3.16	21.9	38.5	51.4	3.62	16.7	259	1	1	1.27
49.1	2.25	11	292	34	30.5	37.5	379	1	90.6	2.74
44.9	3.08	27.6	2.27	41	8.06	10.5	382	1	1	1
48.3	1.32	17.2	145	16.4	9.31	24.1	1219	1	1	1
33.4	3.16	18.8	69.8	7.84	7.7	12.6	328	1	28.1	1.1
47	2	47	56.7	48.7	8.51	14.2	368	1	15	1.89
125	1.43	5.42	223	29.4	21.1	18.9	313	1	9.39	1.5
47	1.3	47.4	115	22.1	8.28	12.1	300	1.64	1.84	1.42
10.2	1.6	22.5	18.6	20.9	7.37	16	615	8.28	271	1.64
34.9	3.02	30.8	24.1	20.4	18.8	19.5	239	39.2	28.4	7.99
58.8	5.33	18.6	18.9	7.1	23.1	29.4	248	20.2	5.14	1.6
40.7	2.23	19.3	27.4	15.3	8.28	6.49	221	1	82	2.46
31.9	2.37	8.51	227	37.2	26.2	35.9	340	2.35	1	1.39
45.3	1	28.4	14.9	4.1	20.7	23.7	281	1	221	3.55
48.7	2.23	19.1	22.7	11.5	30.8	44.5	750	1	5.23	1.96
30	1.21	55.2	449	117	9.06	11.4	400	1	1	1.03
1	2.07	22.3	135	21.3	26.9	33.4	368	1.19	14.3	2.29
34.6	1.64	13.2	133	30.8	6.61	9.39	514	1	1	1.19
40.7	2.69	21.7	183	56.2	17.3	15.3	269	1	1.96	1.11
43.7	4.07	34.6	31.6	11.4	4.96	6.15	257	1	6.61	2.02
60.4	1.01	16.7	157	22.3	37.2	44.1	784	1	3.02	1.42
36.5	3.85	14.9	127	20	25.7	31.6	334	1	3.02	1.3
22.3	2.35	24.8	24.6	3.55	11	14.7	340	1	1.35	1
39.2	1.01	16.7	8.9	2.35	61	67.3	1075	1	13.8	1
8.28	1	12.3	117	8.06	7.5	18.8	599	1	1	1
26.7	2.76	10.7	284	46.6	7.91	21.5	1114	2.07	28.4	1.7
39.2	1.32	28.1	40	18.4	34.9	42.9	523	1.15	1.01	4.22
57.3	7.57	10.8	100	20.7	9.65	13.1	286	1	30.5	1.98
41	2.71	15.5	97.3	34.9	26.4	29.4	313	1	1.01	1
12	7.57	20	18.9	10.9	20.5	32.5	368	1	1	1.38
31.6	1.78	18.8	18.9	3.13	23.5	28.1	414	1	15.8	2.71
33.4	2.39	7.5	205	35.2	92.2	106	1843	1	2.81	4.22
40.7	4.07	20	15.5	7.17	13	17.3	297	1	1.61	1.21
40.3	1.01	18.3	99.1	42.6	21.7	34	449	1	1.27	1
31.3	2.44	17.9	57.8	11.7	8.51	14.7	328	1	108	2.15
31.6	2.39	5.33	183	31.6	10.6	12.5	382	1.42	120	1.67
35.5	1.58	16.3	90.6	18.8	12.5	37.5	743	1	1.02	1
30	4.87	11	175	18.9	6.32	16.8	233	1	1.06	1.35
24.8	2.86	10	20.4	17.5	13.8	12	352	1	1.41	1.01
24.8	2.69	13.5	164	31.3	18.8	27.6	281	1	1.43	1.46
85.8	22.9	28.4	28.9	18.4	11.5	13.5	239	1	1.13	1
8.66	1	7.77	213	32.8	16.4	20.4	334	1	1.72	1
78.4	2.89	26.9	33.4	7.5	17.9	22.3	359	1.11	1.79	1.42
62.1	1.03	9.91	205	35.5	9.14	12	253	3.16	259	1.19
42.2	7.64	35.5	372	77	30	28.9	349	5.52	2.71	1.27
35.2	1.29	39.2	279	64.4	10.9	15.7	319	1.06	1.01	1.23
13.8	1	21.9	16.4	13.7	52.8	61	1065	1	1	1.03
7.64	1.27	12.7	139	38.5	8.82	9.91	300	1	1	1.37
35.9	2.02	13.8	112	7.43	77	93.1	1582	1	1.01	1.23
28.6	2.48	20.4	20.9	6.1	15.8	25	257	4.03	1	1.33
60.4	9.82	34.3	50.9	32.5	22.3	21.7	269	1	157	1.67
31.9	1.22	16.4	231	37.5	7.57	14.9	248	1	12.6	1.72
23.7	2.11	15	120	25.9	40	45.7	737	1	1.83	1.11
47.8	7.7	25.7	26.9	13.9	37.2	40	349	2.41	104	3.79
58.3	10.4	28.6	25.7	14.2	29.7	27.6	237	24.1	2017	1.22
53.8	1.01	5.42	15.8	62.6	8.66	11.1	300	1	1.07	1.6
28.9	10.1	50.5	253	73	67.9	79.9	1526	1	3.08	1.01
35.9	3.85	32.5	37.2	19.6	4.33	14.3	331	1	12.6	1.29
85.1	1	18.3	17	6.73	49.1	61.5	806	8.28	294	2.29
40	1.73	17.9	19.3	15.7	69.2	90.6	1731	1.61	13.8	1.53
40.3	3.59	23.9	35.5	62.6	27.9	47.8	649	1	1.36	2.02
40	3.72	17.5	123	28.4	12.6	14.7	233	1	59.9	2.74
31.3	3.43	19.8	25.9	16.5	21.7	21.7	281	1	16.3	1.19
26.2	2.19	11.9	188	35.5	61	87.4	1286	1	1.01	2.76
48.7	1.58	21.9	21.9	14.2	5	12.6	346	1	4.49	13.1
51.4	1.01	22.3	25.5	31.6	8.9	15.1	328	1	10.8	2.33
62.6	1.08	18.4	12.7	13	74.3	85.1	1252	1	2.21	1.75
44.5	1.01	20	12.7	13.6	2.67	10	372	1	2.37	7.7
47	1	21.7	120	10.6	2.92	16.8	255	1.68	4.7	9.56
28.6	2.39	11	168	18.4	29.4	38.9	407	1	1.01	1.55
35.9	2.62	29.7	29.2	28.1	44.9	52.8	799	2.41	349	3.22
22.7	2.17	9.73	284	14.1	12.2	20.7	359	1.33	17.9	1.2
47.4	2.13	18.9	19.6	6.61	18.1	22.3	294	2.86	1	1.18
41	1.83	25	18.8	21.7	50.5	55.2	673	2.21	3.02	1
25.7	2.19	20.2	23.1	18.3	14.2	22.7	297	1	1.01	2.37
33.4	2.94	16.5	93.9	20.7	52.8	59.9	1219	3.37	62.6	4.07
1.02	2.13	33.7	163	55.7	6.55	12.6	626	1.31	25.5	1.09
20.5	10.8	16.1	111	17.9	20	25.5	316	1	96.5	2.31
39.2	1.01	17.3	137	25.3	7.77	15.3	274	3.79	101	2.09
31.3	1.51	29.7	37.9	22.7	19.1	17.3	235	1	109	1.38
51.9	1.01	30	35.2	29.7	35.9	48.3	649	1	28.4	1.72
39.6	1.24	19.1	25	17.6	20	34	375	1	14.1	1.49
47	1.64	23.5	9.31	5.33	64.9	68.5	947	1	2.97	1.37
35.5	1.13	18.3	137	35.2	16.5	23.3	359	4.45	157	1.53
67.3	21.9	8.9	205	34.9	28.6	34.9	276	3.11	95.6	3.37
22.3	3.34	34.9	271	55.2	11.7	31.9	567	3	1	1.61
139	4.66	30.8	54.7	84.3	59.9	69.2	1037	1	154	1.72
41.8	2.59	30.5	17.6	19.6	2.67	10.2	1037	1	1	1
5.09	1.31	18.1	117	20	7.3	8.9	352	1	19.1	1.45
17.6	10.6	12.9	141	42.2	8.13	9.47	289	12.9	3.65	1.96
38.2	3.68	18.4	82.8	18.8	17.3	72.3	2525	1	7.64	1.19
36.8	1.47	15.1	82	34	2.44	6.85	255	1.04	1	3.19
49.1	1.86	1.49	18.9	7.77	15.7	16.5	308	4.66	1.01	2
58.8	1.81	12.7	231	35.2	9.31	13.7	302	63.2	2525	12.6
44.5	1	23.9	48.7	5.05	8.66	25.5	552	1.47	9.06	4.53
24.6	6.73	27.4	20.5	1.01	35.5	37.5	319	2.25	184	3.55
6.44	1.95	16.8	24.1	23.3	9.47	18.4	2129	2.35	1	1.06
31.9	1.54	15.1	143	7.04	11.9	17.3	328	2.07	1	1.06
9.56	1.06	27.1	77.7	22.1	12.9	17.3	368	1	1	1.06
1.95	1.06	21.5	36.5	18.6	23.9	25.9	407	1	1	1.21
91.4	2.07	14.1	14.3	7.1	14.1	45.3	750	1	1.09	1
57.3	2.15	18.4	62.1	27.4	9.82	9.31	279	1	3.49	1
40.7	5.33	13.5	18.4	15.8	33.1	44.1	965	17.6	311	30.5
153	1.84	25.7	19.6	16.3	12.4	21.3	334	2.33	27.9	2.25
27.9	1.01	24.8	99.1	31.6	12.2	18.4	466	2.67	175	1.6
43.7	1	12.6	17	25	35.9	50.5	791	1	186	1.37
22.3	2.92	44.9	165	82.8	14.6	24.8	346	1	19.8	3.85
37.9	2.81	13.6	179	16.1	7.5	54.2	604	1	1	2.71
51.4	2.27	16.1	66.1	10.8	37.2	52.8	1134	1.57	82	3.68
28.9	1	20.7	168	25	14.9	38.5	1114	1	14.3	1.88
68.5	7.43	26.7	27.1	8.51	28.4	30.8	311	7.5	241	1.45
51.4	4.57	12.1	29.2	16.1	18.6	30.5	382	1	196	3.16
34.3	1.42	11.1	146	15.5	54.7	74.3	1731	4.91	483	1.51
38.2	2.29	35.9	27.6	18.6	16.4	26.2	422	2.35	1	1.49
27.6	1.23	18.9	239	29.4	88.2	110	2110	2.97	63.8	1.06
25.7	2.57	19.6	16.4	3.82	8.51	21.1	1144	1	1	1.84
44.5	1.86	47	302	118	11.1	17.3	300	1	50.5	1.6
53.3	2.02	11.4	95.6	4.29	35.5	50.9	667	8.82	519	4.14
24.8	1.15	33.4	274	72.3	10.6	22.3	311	1	1.64	5
31.9	2.92	20.5	352	61.5	10.3	9.91	375	1	176	1
28.6	1.42	19.3	8.2	8.9	39.6	54.7	692	1	10.3	1.47
37.9	1.65	23.5	191	98.2	47.4	58.8	1275	1	9.82	1.01
112	7.91	24.4	40	19.6	6.49	11.7	414	1.25	1	4.87
135	1	4.57	337	45.3	53.8	56.7	1114	1	4.07	1.67
54.7	2.94	37.5	264	54.2	10	12.3	297	1.27	806	2.89
15.7	2.31	19.8	37.5	30.8	11.1	16.5	343	1	1.01	1.3
15	1.01	43.3	69.2	49.6	12.6	16.4	241	8.2	231	1.47
32.8	5.33	16	248	41.4	58.8	89	1009	1.49	1	1.18
6.67	3.4	19.8	34	12	23.5	30	349	1	7.3	1.61
38.2	4.18	16.5	16	22.9	10.9	15.5	292	1.75	1	1.49
34.9	3.55	9.73	146	30.5	6.49	14.1	319	2.79	22.7	1.49
30.8	1.01	22.9	76.4	28.4	4.74	10.1	704	2.39	31.3	1
38.5	1.39	31.9	286	57.8	12.4	17.3	400	1	7.37	1.1
31.6	1.01	15.8	142	48.7	12	16.1	292	1	1	1.39
44.1	2.97	17.3	21.5	9.47	20.2	37.5	1165	1	3.72	1
47.4	1.25	21.7	14.5	5.42	8.98	16.5	325	1	1	2.09
33.1	1	11.5	414	50.5	15	25.7	340	1	10.6	2.11
21.1	1	12.4	86.6	24.4	27.4	36.8	385	1	1	1.07
26.4	4.18	8.9	294	43.3	6.04	21.7	478	1	215	1.04
33.1	1.72	27.9	26.7	17.5	7.17	10.8	300	1	15.1	1.32
43.7	3.11	42.2	41	47	8.51	13.5	316	1	1.01	2.37
37.9	5	29.7	41.4	18.1	9.31	11.7	316	1.31	1	5.62
18.3	1.01	20	25.3	4.74	71	87.4	1134	1	10.9	1.76
43.7	1.31	60.4	221	31.9	6.44	10.6	311	1	3.43	2.19
39.6	1.57	16.7	147	41	8.2	11.4	365	1.23	13.7	4.45
53.8	1.09	20.2	18.3	32.8	6.98	14.5	294	1	1	2.19
42.9	3.79	10	19.5	12.6	42.2	40	229	1	1.39	1.89
36.5	1.31	18.4	183	29.4	53.3	88.2	1582	9.73	69.2	1.93
37.2	1	12.9	235	16.7	10.6	15.3	437	1	9.22	1
19.8	4.29	15.1	30	6.49	3.92	9.31	1009	2.31	4.49	1.05
31.3	1.84	18.1	92.2	13	9.14	16.4	297	1	3.13	1.7
33.4	2.94	43.3	308	85.8	7.43	11.9	281	13.2	276	2.15
44.9	11.8	33.4	22.1	22.1	13	15.8	334	5.94	6.85	2.53
26.7	1.01	22.3	50	13.2	18.9	18.6	352	1	70.4	1.26
53.8	1.21	15	100	44.5	57.3	67.3	1843	3.43	6.79	1.06
26.4	3.52	31.6	28.1	18.9	16.8	28.9	385	1	3.11	1.55
53.8	1.91	28.6	22.7	9.91	16.8	16.5	313	1	1	1.41
40.3	1.01	13.5	165	28.6	4.22	17.9	322	1.07	17.2	1.91
9.65	1.75	18.9	25.7	1.57	53.8	54.7	343	1	1.91	1.04
24.8	2.17	41.8	172	48.7	31.1	38.9	410	1	127	1.38
34.9	1	27.6	69.2	31.1	25.3	35.2	355	1	3.79	1.38
1.19	1.83	67.3	188	154	34.9	36.8	437	1.26	6.67	1.76
17.9	6.79	23.9	23.3	15.3	27.4	43.7	1219	1	1	1.08
40	1.27	5.57	189	24.8	11.2	16.5	396	1	12.2	2.39
1	1.54	27.6	23.3	17.9	89	114	2329	1	1	1.38
36.5	1	46.1	15	67.3	7.7	34.3	638	1	1.01	1.53
35.2	1	26.2	40.3	19.5	21.5	19.3	340	6.1	68.5	14.7
61.5	3.82	20.9	32.5	9.39	21.5	33.1	453	1.57	12.6	2.02
49.6	1	27.1	18.3	12.1	14.5	18.8	259	9.14	615	3.08
49.6	1.61	28.1	21.7	11.8	67.3	72.3	1046	1	269	3.13
37.2	1.11	56.2	85.1	97.3	14.7	21.7	253	1	18.9	1.38
32.2	1.18	15.3	16.8	19.3	7.7	13.2	305	1	2.23	1
72.3	3.02	37.9	10.6	71	3.22	10.4	286	1	1.01	2.94
16	5.83	17.8	66.1	44.9	13.7	16.7	308	1	1.01	1.01
38.2	2.62	8.98	229	24.6	5.62	14.3	407	1	9.65	1.35
89.8	1.18	31.1	54.7	10	10.4	10.1	319	1.65	255	1.54
41.4	2.13	50.9	83.5	5.83	26.2	34	1027	1	2.92	1.27
33.1	1.25	23.7	31.6	22.1	9.39	12.6	250	1	1	1.2
34.6	1.39	9.06	109	32.5	12.4	10.6	322	1	2.07	2.02
44.1	1	17.9	91.4	35.5	17.9	25.7	300	1	2.39	1.14
34.6	6.55	27.4	16.5	1.01	7.3	18.3	313	19.6	4.45	11.7
24.1	2.09	34	346	83.5	93.1	114	1241	8.58	1	1.07
61	2.21	42.6	227	98.2	4.03	13.7	217	5.78	26.9	3.49
42.2	1.76	18.1	63.8	15.5	6.79	12.5	346	1	5.67	1.12
39.6	3.68	77.7	253	80.6	47.8	61	723	1	1	1.02
48.7	11	18.6	248	48.3	10.7	15.1	235	1	1	1.11
54.2	1	18.1	40	11.2	41.4	53.3	692	10.1	552	10.6
27.4	1.01	16.3	119	26.9	5.67	10.5	445	5.52	113	1.86
21.9	1.01	23.9	17.8	11	17.5	22.7	340	7.64	115	1.25
40	2.64	25.5	101	15	8.74	13.2	257	1	186	1
37.2	2.23	9.31	17.8	12.6	3.49	17	368	1.29	1	1.21
47.8	3.72	2.27	17.2	42.9	17.9	21.7	410	1	1.35	4.03
39.6	1.53	18.3	67.9	17.6	9.06	10	250	1	10.6	1
3.55	1	19.1	1.57	6.38	12.4	15.1	297	1	1	1.86
88.2	1.31	18.8	93.1	52.8	9.14	15.3	389	1.88	1	1.46
19.8	3.52	27.1	43.7	8.66	15.8	83.5	1186	4.7	26.4	6.04
18.9	3.52	17.3	188	42.2	14.5	18.1	365	1	1	1.03
34.6	4.07	22.5	100	41.8	41	62.6	1134	1	2.55	1
50.5	12.5	18.1	23.3	15	70.4	84.3	1611	8.9	63.2	14.2
35.2	1	25.3	23.5	13	23.3	18.3	305	1	17.9	1
27.1	1.11	27.4	35.9	14.1	20.4	22.3	297	1	15.4	1.49
59.9	1.01	41.4	311	93.9	9.39	12.3	294	1	445	2.19
14.3	1.76	32.2	227	19.6	18.1	29.4	737	1	7.17	2.44
28.4	2.11	1	6.1	30.5	18.6	22.1	269	21.1	2690	5.99
44.1	1.89	30	39.6	21.1	2.5	9.22	279	3.65	308	7.91
43.3	1.61	13.1	120	24.4	4.74	5.33	79.9	1	1.01	1.58
40.3	2.64	13.7	111	27.9	13.3	17.3	325	1	1	1
176	1.01	31.1	35.2	23.9	21.7	24.4	305	1	1.01	1.24
25.9	1.58	6.67	147	17.2	10.2	13	276	1	1.53	1
21.9	3.62	23.7	26.9	7.23	58.8	90.6	1420	1	5.28	1.68
85.1	1	17.9	161	12.4	10.6	20.2	308	3.37	340	14.5
34	1.95	27.9	30.8	30.2	4.33	6.04	133	1	53.3	1
51.9	1	14.5	147	34.3	7.37	14.7	274	2.07	40.7	5.47
31.9	2.62	20.2	25.9	10.5	22.9	33.1	311	1	1	1.2
38.9	1.33	10.1	20.5	7.91	69.8	81.3	1334	1	1	2.55
45.3	1	24.1	36.5	15.8	4.7	23.3	346	5.73	250	1.6
31.9	2.71	13.7	195	20.2	16.1	16.8	322	1	11.8	2.67
49.1	12.4	32.8	27.9	22.7	11.7	38.2	1144	1	2.55	1
23.3	4.61	17.8	22.1	14.9	48.7	67.3	922	1	9.82	1
28.1	4.49	18.8	20.2	10.2	3.08	21.9	730	1	1.75	2
34.6	7.1	5.73	20.7	15.1	32.2	41.4	813	44.5	1382	2.44
30.5	1.01	7.3	173	22.9	6.61	13.7	890	1	1	1.65
