# Supplementary material
Source: ML conference proceedings conference paper supplement (https://openreview.net/forum?id=nrbR2F29vU)
Supplement: supplementary_material [file 10. cd3cd28icam2+aktinhib.xls]

## Sheet: Sheet1
praf	pmek	plcg	PIP2	PIP3	p44/42	pakts473	PKA	PKC	P38	pjnk
75.7	16.8	45.7	50.9	25.9	61	106	906	4.41	17.8	31.3
42.2	20.2	6.04	5.78	1.45	1	3.46	12	4.83	17.8	25
13.3	17.9	7.23	6.1	5.88	33.1	55.7	626	4.57	10.2	40
75	46.6	6.44	10.5	8.51	61	93.1	982	4.78	13.3	39.2
30.2	18.8	7.04	143	32.2	71.7	118	1275	8.43	24.1	62.6
63.2	50.9	14.5	11.9	3.68	38.9	71	1640	10.6	24.4	67.3
213	145	5.42	8.2	19.3	79.1	139	1811	6.1	28.6	48.3
45.3	36.8	3.75	730	106	24.1	43.3	400	5.28	14.9	85.8
55.7	39.2	2.86	16.1	13.1	77.7	167	2666	2.39	14.2	44.5
45.7	8.35	9.82	316	118	42.9	64.4	673	10.2	9.65	1.75
106	81.3	1	221	20.9	10.7	8.58	334	5.09	29.4	33.1
77	73	9.56	276	78.4	20.7	39.6	615	8.9	30	40.7
85.8	88.2	4.87	94.7	7.17	47.8	66.1	269	9.14	19.8	46.6
54.2	41.4	14.2	392	72.3	37.9	59.9	372	5.05	14.3	56.2
105	85.1	20	32.2	17.8	67.9	106	297	2.59	8.06	44.5
227	158	16.3	302	78.4	11	27.9	533	8.98	24.6	82
12.4	11	31.6	316	102	3.62	20.4	165	8.9	24.6	21.7
30	23.9	8.13	10.1	5.52	32.2	58.8	717	6.67	23.7	6.32
213	257	5.33	143	8.74	45.3	106	1625	6.98	10.2	38.2
34.9	22.1	1.46	505	92.2	34.6	73.7	2035	4.66	18.6	50
135	98.2	10.9	13.9	11.7	67.9	170	2207	4.96	35.2	57.3
102	82	2.33	389	85.8	42.9	75	1027	3.31	16.8	39.6
60.4	47.4	3.13	302	59.9	22.9	35.2	322	3.96	8.28	19.6
34	22.5	10.6	11.1	13.1	9.82	12.4	200	4.53	17	33.4
39.6	22.1	10.7	10	3.22	41.8	64.9	392	6.61	49.6	44.1
69.8	66.7	59.4	70.4	55.7	15.1	46.6	1165	14.3	51.4	17.9
109	14.2	8.74	308	55.7	58.3	84.3	661	1	10.7	3.55
33.7	28.1	2.69	302	87.4	52.3	100	1827	2.59	16.3	38.5
41	28.1	6.61	12.1	1	79.9	101	365	2.89	7.23	27.1
97.3	89.8	7.57	302	53.8	41.4	68.5	1263	4.57	17.3	63.2
32.2	23.9	1	429	117	20.4	34.3	322	3.79	17.8	32.2
118	71.7	4.07	286	47.8	35.9	57.3	264	8.28	14.6	33.1
62.6	51.9	37.2	21.1	16.3	81.3	129	874	7.3	18.1	67.3
138	86.6	5.57	9.65	9.65	95.6	267	2571	7.3	22.1	34
24.4	14.9	7.64	165	41.4	33.7	58.3	1346	6.32	20	23.9
135	186	6.32	237	52.3	16	34.6	313	7.3	22.3	43.7
61.5	24.8	28.1	429	114	26.9	44.5	281	2.94	14.9	16.8
33.1	17.8	12.6	13.1	17.6	85.1	195	3995	6.32	20.7	45.7
25	14.2	3.31	2.92	12.5	66.7	165	3460	10.3	18.1	47.4
40	43.7	1	302	53.8	40.7	62.1	445	9.31	33.7	99.1
42.2	23.7	5.99	200	46.6	27.1	48.7	253	5.94	7.91	25.5
114	120	5.09	346	61	13.6	42.9	638	8.51	27.4	46.1
75	61.5	4.53	302	41.8	45.3	56.2	368	7.91	31.9	49.6
74.3	67.3	9.39	24.4	1.54	61.5	75	313	7.57	17	42.6
32.5	33.7	5.14	4.96	1.95	25.7	50.5	491	6.32	27.1	63.2
151	99.1	2.25	567	86.6	21.3	48.3	519	4.33	20	36.8
44.1	34.9	13.6	271	79.1	32.2	63.8	965	10.9	29.7	55.7
30.5	24.6	10.4	13.3	5.33	20.7	43.3	359	4.49	20.4	50.9
32.5	30.5	6.61	15.5	4.87	26.9	42.6	337	4.22	21.9	50.5
40	19.3	11.8	362	38.5	24.8	47.4	372	1.91	10.2	28.4
68.5	81.3	10.6	7.37	7.77	38.5	49.6	368	1	35.2	2.46
83.5	77	4.7	146	23.9	16.1	88.2	1526	7.91	26.2	78.4
181	186	1	289	13.3	28.4	33.1	305	3.46	13.5	37.2
29.4	22.9	50.9	542	76.4	7.1	10.3	372	9.31	26.9	46.6
58.3	43.7	8.35	389	72.3	54.7	136	1877	7.91	30.2	29.4
84.3	61.5	34.9	16.1	61	24.8	49.6	355	2.62	17.9	47
98.2	139	8.2	28.4	17.3	17.2	32.2	372	4.03	22.5	25
69.2	48.3	108	143	91.4	94.7	189	2329	7.37	34.3	44.9
66.7	51.4	18.8	10.7	5.09	43.3	64.9	770	11.8	34.6	34.6
26.4	20.2	6.67	17.9	3.49	36.2	54.7	284	7.84	22.1	17.2
36.8	30	2.5	6.92	12	10.8	26.7	496	7.7	19.8	50.5
61.5	17.8	9.65	19.6	14.3	27.1	50.5	284	5.47	12	37.5
189	124	4.7	107	28.4	35.9	54.7	385	4.74	13.6	35.5
36.8	20.9	4.57	17	8.51	7.64	16.7	313	9.73	16.1	58.8
38.2	25.3	13.5	94.7	12.1	13	32.5	426	1.76	16.7	34.6
237	191	10.4	12.7	19.6	17.3	33.1	466	8.13	30.8	54.2
207	262	8.51	10.5	1	6.61	28.6	743	4.74	17.9	53.3
27.4	25	20.4	123	25.3	76.4	106	389	4.41	13	24.6
85.8	21.1	8.13	31.1	17.9	28.6	46.6	396	44.5	76.4	16.8
60.4	51.4	1.86	118	16.3	36.5	40	379	5.99	18.6	24.6
39.2	31.1	14.1	22.7	15.8	35.5	44.9	385	4.57	17.3	33.1
27.1	24.6	5.99	95.6	28.9	44.1	64.9	737	2.94	13.5	32.8
97.3	72.3	7.37	10.1	9.56	64.9	127	1165	4.53	11.8	44.9
119	85.8	4.45	11.3	15.5	9.14	36.5	392	7.3	11.1	66.7
235	176	10.6	30.8	25.5	43.7	75.7	1165	3.28	11.4	30
31.6	20.5	9.82	8.98	6.98	25.5	137	547	6.67	11.7	37.9
102	62.1	16.1	294	82	126	219	3960	4.22	13.9	37.9
99.1	67.3	1.58	392	40.7	11.3	47.8	784	6.85	27.4	59.9
44.9	24.1	10.6	68.5	51.4	26.9	35.5	319	9.22	25.3	46.6
213	150	16.1	168	26.9	18.6	32.2	316	8.66	16.8	31.6
160	126	7.7	99.1	22.9	52.3	85.8	1512	8.58	36.8	45.7
82.8	48.3	20.4	170	30	151	300	4532	10.1	35.2	104
36.5	16.7	1	193	38.5	47.4	108	1540	7.5	14.6	45.3
40	29.2	4.37	77.7	14.6	32.8	52.3	407	2.48	9.65	41
127	106	11.2	239	37.9	12.2	28.6	519	5.67	9.39	35.9
21.3	24.4	2.92	292	36.8	23.3	50	723	33.4	40.3	3.82
28.9	23.5	11	12.4	25.9	54.2	160	4142	2.13	23.7	6.49
33.1	22.7	8.98	16	21.3	99.1	225	2525	10.4	32.5	94.7
62.6	48.7	3.34	126	43.7	44.9	67.9	325	5.52	16.7	53.3
37.2	36.8	20	48.3	48.3	18.6	57.8	1230	7.04	22.3	34.9
61.5	40.7	6.55	328	67.3	40.3	75	457	10.6	11.3	40
51.9	42.9	69.8	225	125	43.3	75.7	1877	1.06	90.6	4.91
35.2	19.5	7.5	11.4	9.39	11.3	21.7	237	3.52	14.6	31.9
31.9	12.5	6.61	10.6	11.4	55.7	71	533	3.43	16.4	42.6
62.1	31.1	49.1	126	75.7	52.8	63.8	562	5.62	9.56	41.8
104	32.8	41.4	202	50	48.7	90.6	2288	9.56	19.5	46.1
107	135	12	191	47.8	392	523	2996	5.28	10.9	23.7
137	183	13.2	8.28	18.4	21.1	40.7	340	5.52	25.9	31.1
58.3	46.1	12.6	27.9	29.2	2.44	15.7	65.5	5.62	18.6	1.72
90.6	104	53.8	429	147	12.1	29.4	496	6.04	21.3	40.3
85.8	59.4	12.6	1.95	18.3	30	46.6	519	10.3	25.5	34.9
42.2	22.3	8.2	29.2	12.2	58.3	135	4179	5.28	10.6	34
43.7	34.6	5.99	20.4	10.3	21.7	45.7	882	6.61	23.5	32.2
35.2	16.8	9.65	308	58.3	40	51.9	292	5.38	24.1	44.1
25	16.5	7.77	6.1	7.77	13	25.3	538	13.7	30.2	55.2
67.3	56.7	2.67	11.8	9.39	20.2	36.5	547	2.86	18.1	47
157	125	7.57	117	26.2	22.3	44.1	457	3.85	8.43	18.9
47.4	33.1	7.64	10.3	9.22	25	37.9	331	8.98	19.8	42.2
35.9	25.3	4.07	407	61.5	7.23	36.8	500	3.75	27.4	37.9
44.5	30.5	8.98	7.91	1.54	24.8	32.5	567	9.65	26.7	42.6
35.2	25.7	4.22	92.2	10.5	26.7	40	400	7.91	15.7	49.1
120	164	2.64	63.8	5.62	58.8	120	2148	4	25.5	35.9
30	21.1	1.86	188	39.2	29.7	44.5	588	2.29	8.82	9.56
108	82	17.9	325	60.4	34.6	46.6	505	3.79	16.4	30.5
117	89.8	1.12	200	24.8	77	211	2642	9.65	31.1	101
66.1	77.7	1	104	2.69	6.38	16.3	750	6.1	31.1	50.9
170	119	26.7	368	108	59.4	90.6	496	10.5	28.1	58.8
104	109	4.37	89	9.56	12.6	34.9	704	12.3	43.3	62.1
21.9	16.5	8.82	52.3	4.29	38.5	60.4	445	4.96	23.9	29.7
99.1	71	11.8	8.82	6.92	45.7	73.7	704	7.64	30	64.4
31.9	20.4	23.5	21.7	14.5	42.9	59.9	542	6.44	41	72.3
38.2	19.6	7.57	13.7	8.35	38.9	52.3	573	7.23	11.9	43.3
2.41	1.72	9.06	93.1	17.5	24.8	56.2	874	8.06	25.3	46.6
89.8	85.1	2.86	151	6.32	26.9	52.8	453	7.43	20.2	42.9
153	85.1	31.3	274	111	31.3	48.7	1794	7.3	21.3	62.6
39.2	16	10.2	69.2	18.8	15.3	29.7	610	3.22	4.83	32.5
79.9	19.1	4	74.3	17.6	16.5	31.1	1433	7.17	27.4	66.1
126	135	6.26	83.5	11	26.2	42.6	466	14.2	31.1	5.42
122	183	6.79	62.1	20.5	82.8	209	2714	5.05	20.4	28.1
30.8	30.5	2.25	88.2	24.6	35.2	58.8	453	12.4	26.4	66.7
26.9	17.9	9.91	11.5	11.7	22.7	31.3	533	3.37	17.6	25.9
46.1	7.99	5.88	11.1	8.74	32.2	52.3	429	21.3	56.7	138
64.9	55.7	17.6	97.3	31.6	25.5	46.6	704	4.03	8.74	24.6
112	64.4	7.84	31.1	15.7	44.1	61.5	441	6.26	11.2	46.1
55.7	31.6	8.35	13.5	5.52	43.7	71.7	392	7.77	32.5	39.2
28.6	13	40	55.7	17.8	19.5	38.5	500	6.61	11.9	38.2
44.1	31.9	14.2	331	77	48.3	78.4	379	28.4	127	248
108	65.5	6.49	6.67	13.8	113	289	5674	16.4	27.4	11.3
66.1	49.6	3.52	13.8	18.3	15.5	38.5	437	7.04	25.5	46.6
27.1	21.3	5.62	75.7	23.5	93.9	188	2548	2.21	12.1	26.2
52.3	30.2	42.6	108	102	25.5	56.2	1155	5.42	10.5	59.4
27.6	25.7	4.53	47	9.91	90.6	186	3652	4.37	26.9	67.3
37.5	30.8	15.8	124	26.7	24.6	45.7	281	1.98	5.62	23.5
23.5	20.4	3	375	70.4	18.3	34.6	322	11.2	21.1	35.5
35.2	33.1	5.62	115	23.9	18.4	38.9	294	1.27	44.5	8.43
29.7	35.5	7.3	13.5	12.3	48.3	79.1	375	4.91	21.3	22.9
33.4	31.6	13.1	21.7	3.89	53.3	75	461	8.43	23.7	55.2
41.4	18.4	6.21	36.8	9.14	16.5	37.5	644	1.36	52.8	10.5
12.6	36.2	15	16.5	19.6	22.3	47.8	457	8.2	45.7	42.2
71.7	62.6	5.33	6.92	4.37	9.47	33.4	866	6.79	19.6	28.4
157	157	11.3	385	63.2	7.91	34.9	418	5.05	4.07	27.6
17	35.9	10.3	63.8	11.7	12	21.9	255	5.57	13.9	30
58.3	39.2	9.39	72.3	17.9	13.5	29.2	483	6.92	19.6	61
41.8	12.5	5.83	74.3	4.26	23.9	37.9	552	7.7	12.3	44.9
36.5	35.2	9.22	5.88	7.7	41.4	66.7	343	10.4	37.2	96.5
56.2	42.9	11.8	9.91	15.4	12	33.4	449	4.33	23.1	48.7
85.1	52.3	8.66	99.1	22.7	31.9	55.7	588	9.31	21.1	54.2
132	104	37.2	3.65	29.2	88.2	168	2788	9.65	13.8	25.9
93.1	105	45.3	108	18.4	10.1	21.7	355	6.44	17.9	63.2
38.9	20	4.03	48.7	22.9	39.2	57.3	355	7.17	30.8	56.7
42.9	22.7	10.8	133	31.1	29.7	72.3	1322	3.82	7.57	42.2
168	302	29.7	410	117	54.2	126	2129	5.78	37.2	53.8
33.4	17.9	1	414	67.3	20.2	36.2	514	10.7	18.9	51.9
61.5	41.8	19.6	31.3	11.9	15.4	43.3	1114	6.61	23.7	87.4
41.8	27.1	1	319	33.4	18.4	28.9	667	12.3	29.7	3.96
52.8	46.6	13.8	87.4	34.3	31.3	48.7	429	8.74	30.8	32.2
38.2	27.4	1.45	244	27.4	112	253	3460	5	18.9	51.9
146	118	8.28	12.5	9.06	58.3	111	1596	7.17	18.6	29.4
46.6	30.8	20.9	362	80.6	31.1	45.7	445	4.87	13.8	32.8
64.4	42.6	6.73	13.6	3.08	7.99	32.2	322	13.7	44.5	176
55.7	45.7	6.32	89.8	16.3	29.7	49.1	578	5.23	22.1	31.6
81.3	52.8	10.4	9.91	12.1	35.9	51.4	346	6.44	26.9	44.9
69.2	37.5	8.06	117	35.9	77.7	123	1275	8.35	35.5	104
37.5	19.8	4.91	396	40	24.6	44.1	573	3.49	25.3	18.9
32.5	25.5	8.2	9.06	1.6	87.4	213	2666	10.4	34.3	40.7
37.9	22.5	9.14	12.9	1.41	25.5	43.3	509	3	22.5	13.7
34.6	17	10.9	365	52.3	54.7	119	2091	6.67	28.4	28.6
101	69.2	2.05	311	52.3	23.7	37.5	426	7.23	30.8	57.3
30	15.8	82	198	67.3	43.7	56.7	422	9.56	23.5	38.2
33.4	28.1	1.42	302	40.7	11.2	31.1	514	7.77	12.4	27.6
138	231	1	149	27.4	18.3	47	1208	7.57	35.5	70.4
31.1	19.1	8.74	231	41.4	15.5	45.7	661	7.91	12.7	22.5
73.7	47	10.1	253	57.3	50.9	92.2	1685	1.27	33.4	5.05
36.2	21.1	5.83	6.1	15.5	27.9	44.9	382	9.91	38.9	112
53.3	19.6	2.13	385	69.8	28.1	39.2	362	3.82	24.1	48.7
33.7	27.4	3.05	16.1	28.9	19.8	103	1104	7.23	26.9	51.4
139	84.3	2.86	385	56.2	54.2	73	281	6.38	18.1	63.2
34.9	20	27.1	131	264	71	142	2167	5.99	22.1	50.5
31.6	14.3	15.8	18.1	6.79	28.9	45.7	487	6.73	26.4	42.6
37.2	27.9	44.1	42.9	30.8	26.2	29.2	509	8.9	20.9	32.5
97.3	26.4	10.6	12.1	6.79	8.2	25.5	730	6.61	20	28.9
73.7	90.6	2.76	445	59.4	12.7	27.6	407	5.28	15.1	39.6
47	30.8	4.96	71	9.31	19.6	61.5	1981	8.35	27.4	84.3
42.2	8.82	1.43	154	16.4	29.2	48.3	205	9.65	34.6	47
80.6	75	17.3	259	62.6	47	58.3	461	5.23	22.9	44.5
23.3	23.7	3.59	61	2.46	13.7	36.8	632	9.82	12.3	44.1
60.4	38.9	15.4	13.3	22.1	44.5	65.5	478	6.38	30	87.4
29.4	34.9	10.8	5.47	12.4	15.7	40.3	573	5.78	21.9	61.5
33.7	13.7	39.6	176	39.2	35.5	66.7	851	6.73	28.9	48.3
38.2	22.5	4.74	11.8	23.7	12.5	26.7	599	4.74	45.3	69.2
33.7	30	25.9	33.7	13.9	16.3	30.2	385	6.79	15.7	40.3
41	38.2	1.17	193	33.1	22.7	45.3	491	6.38	19.8	38.2
79.9	81.3	5.67	110	13.6	15	36.2	615	10.4	28.6	32.5
151	110	36.5	281	92.2	15.7	30	445	3.43	49.6	28.9
16.3	4.83	14.2	246	51.9	25	52.3	604	10.9	32.5	54.2
37.2	22.3	11.5	11.1	1	40.7	73	1446	11.1	15	8.43
71	64.9	13.5	19.3	11.3	28.1	74.3	1176	8.74	13.9	40
41.8	36.2	12.5	523	79.9	9.14	19.1	445	2.79	13.3	44.5
188	151	14.1	29.4	32.2	31.3	88.2	2943	7.23	15.7	53.3
56.2	48.3	10.2	8.35	9.65	31.6	52.8	626	5.09	20.4	31.6
40.7	30.5	10.6	9.06	4.91	49.1	100	1554	17.9	68.5	81.3
87.4	51.4	8.28	21.7	14.7	23.3	41.4	418	6.26	25.7	40.7
1.89	3.49	8.06	204	15.4	55.2	117	2017	11.4	25.5	47
38.5	18.3	7.43	161	34	7.91	20.9	604	5.28	33.1	78.4
35.9	22.1	8.43	42.9	13.8	30	38.9	1075	5	14.3	17
39.6	29.7	2.41	79.1	21.1	26.7	66.1	1486	5.14	26.7	35.2
40.7	35.2	2.84	175	28.4	119	267	4105	3.92	56.7	51.9
56.2	48.7	9.65	44.9	23.9	26.9	41.4	368	6.38	17	35.9
36.2	24.8	11.9	286	36.2	55.2	96.5	1625	8.82	17.9	31.1
124	104	5	44.5	13.8	78.4	196	2288	1	11.3	53.3
124	139	9.22	92.2	15.4	21.7	34.6	396	2.71	16.1	32.8
85.8	71.7	1.73	33.7	13.1	19.6	27.9	274	7.77	25.3	28.9
32.8	14.1	9.31	85.8	4.61	19.6	24.4	496	7.43	30.2	55.2
35.5	17.9	5.09	308	39.2	25.3	37.2	457	13.1	27.6	6.49
56.2	32.5	2.48	104	19.3	63.8	97.3	784	8.9	29.2	42.2
89.8	71	11.2	111	23.1	43.3	50.9	375	4.61	20.5	45.7
36.8	24.8	3.65	47	20.4	45.3	69.2	1104	3.82	10.9	53.8
89	77.7	2.62	158	35.2	46.6	135	1486	5.28	15.1	44.9
137	93.9	6.49	15.4	5.52	46.6	147	1433	36.5	83.5	145
27.1	16.3	31.1	289	76.4	50.5	127	2267	7.17	17.2	11.8
30.5	19.6	7.99	7.7	11.8	23.9	47.8	743	1	40.3	5.33
38.2	17.6	12.5	20	4.33	29.7	48.3	355	6.79	7.7	38.9
65.5	53.3	4.61	96.5	25.9	93.1	188	2247	17.5	50.5	96.5
41.8	24.6	1	470	43.3	51.9	66.1	698	9.06	22.5	31.3
106	90.6	35.5	39.6	38.9	11.9	54.7	483	9.31	29.7	61.5
36.8	44.1	8.98	10.5	13.2	24.4	48.7	528	8.82	25	64.9
53.8	54.2	2.84	67.3	11.2	44.9	94.7	2091	5.94	10.1	48.7
51.4	40.7	20.9	24.1	12.4	28.9	53.3	375	2.89	66.1	2.89
135	88.2	14.3	15.4	5.28	61.5	146	1981	12.4	23.5	31.6
63.2	51.4	7.64	325	49.6	20	40.3	410	1.08	15.4	14.9
23.7	22.9	7.77	66.1	6.67	126	178	594	1	79.1	4.29
82.8	48.7	4.78	132	27.9	22.3	57.3	973	8.06	23.7	47
54.7	43.7	2.86	35.5	22.3	32.8	42.6	621	7.37	23.7	6.21
45.3	17.8	10.1	461	86.6	100	271	3786	10.8	22.1	61.5
146	104	35.2	257	35.2	61.5	104	1027	10.1	28.9	52.3
38.5	8.13	3.65	167	31.6	31.6	49.6	552	2.89	17.6	12
81.3	57.8	15.8	453	62.1	57.8	160	2414	9.82	8.58	47.4
68.5	85.8	8.98	538	85.1	34.3	68.5	1230	8.82	25.5	42.6
71.7	44.9	5.42	41.4	15.8	13	33.4	890	6.61	17	37.5
109	85.8	8.51	10.9	4.49	42.2	65.5	274	2.27	16.4	6.85
30.2	39.6	7.57	259	82	50	64.9	418	7.77	21.9	54.7
33.1	22.9	8.58	8.06	14.6	56.2	131	1946	5.62	20	28.4
30.2	22.7	2.81	313	54.7	70.4	101	418	8.66	26.4	56.2
81.3	60.4	28.1	396	57.3	14.7	41	939	5.33	14.7	30.2
17	1.45	6.92	10	1.57	106	322	3106	9.14	15.7	57.3
20.4	29.7	6.15	58.8	9.65	46.1	108	1499	2.44	9.82	24.6
25.7	20.9	11.1	24.6	10.1	64.4	163	1860	6.98	41.8	37.5
25.7	16.8	12.5	37.5	12.3	20.7	49.6	1298	6.49	20.4	31.6
41.4	32.2	1	41.8	6.49	27.6	61.5	1762	6.04	24.6	57.8
31.3	20.2	5	37.5	6.38	62.6	113	1094	3.72	3.89	6.73
27.4	15.1	11.7	11	7.23	34.9	58.3	843	11.9	60.4	59.9
89.8	66.1	34	12.3	48.3	106	163	1877	3.89	39.6	1.95
138	97.3	3.85	227	33.7	46.6	65.5	457	8.13	22.7	43.3
92.2	50	25.9	34	14.7	271	453	2480	8.13	18.6	61.5
79.9	21.3	36.2	99.1	13.7	29.2	51.4	279	7.64	33.7	58.3
121	178	9.56	13.7	5.47	90.6	193	2996	4.53	29.2	10.2
123	105	50.5	61.5	35.5	79.9	117	483	1.78	37.2	2
109	121	1.24	188	22.1	75	124	1731	7.3	13.8	33.4
30.8	22.5	5.23	10.6	2.35	10.6	30.2	562	8.51	14.1	22.9
276	161	8.82	38.5	17.8	20.4	38.9	407	9.82	19.6	42.9
55.2	13.8	11	346	80.6	33.7	49.6	233	25.9	90.6	343
36.2	28.4	15.7	368	66.7	52.3	64.4	615	9.65	27.4	53.8
28.6	17.8	10.7	15.1	10.4	8.9	26.7	931	5.52	13.2	44.5
136	94.7	1.93	52.3	11.7	34.9	54.7	334	6.79	10.9	40
36.2	26.9	15.7	28.1	7.64	49.6	74.3	355	5.83	8.74	10.8
32.2	16.5	1.04	231	35.5	22.9	46.6	487	8.51	16.8	50.5
12.4	12.6	2.35	186	22.9	82.8	164	2167	3.65	14.6	95.6
217	155	14.5	19.3	7.7	40	58.8	372	17.9	46.6	72.3
85.8	96.5	26.7	478	150	9.91	50	453	7.57	10.1	29.7
42.9	27.9	4.7	106	13.2	32.5	53.3	355	9.31	11.5	32.5
53.8	43.7	11.7	18.9	13.3	10.8	29.2	542	5.47	13.7	28.9
30	16	10.7	274	79.1	31.1	65.5	806	5.23	18.4	52.3
33.7	24.4	7.1	7.37	9.56	40.7	61.5	466	9.31	22.3	66.1
25.9	18.3	51.4	53.3	32.2	41.8	56.2	453	6.55	19.6	38.9
106	89	36.8	33.4	25	34.3	51.4	500	7.84	21.9	47.8
60.4	48.3	5.47	365	61.5	26.9	45.3	359	7.57	23.5	34.6
31.6	19.5	15	21.5	18.1	75.7	90.6	389	8.2	28.9	71.7
85.1	62.6	2.02	163	24.6	89.8	141	457	13.6	35.5	72.3
62.6	46.1	8.66	219	32.5	5.23	4.61	175	7.57	29.4	50.9
97.3	133	10.1	9.82	11.8	44.1	63.2	305	9.73	18.6	71
36.2	24.1	1.72	146	10.2	19.6	42.9	505	10.5	18.4	9.31
89.8	25.5	12.5	313	58.8	34.6	67.9	1685	6.1	13.1	30.8
34.6	31.6	10.1	6.79	13.6	14.5	24.1	429	9.56	16.7	42.6
32.2	17.5	21.5	34.6	32.2	30.5	59.9	500	15	36.2	46.1
35.5	28.9	11	19.5	5.99	20.5	33.4	478	10.2	22.1	37.5
188	150	8.2	11.2	9.14	9.56	27.1	538	1	72.3	6.79
40.3	29.2	2.48	108	25	79.1	121	547	10.6	22.9	37.5
78.4	50.5	6.49	104	12.9	54.2	82.8	372	5.52	17	24.6
237	189	4.7	149	40.7	28.4	56.2	523	17.3	43.7	70.4
20	24.1	3.19	145	13.3	16.8	42.9	1084	9.47	20.2	45.7
40.7	26.9	19.3	284	74.3	38.2	59.9	594	3.89	21.7	30.2
47.4	43.7	8.58	13.6	8.74	15.1	38.2	655	1	37.2	1.79
36.2	30.8	1	150	18.6	16.4	32.5	500	6.44	16.1	22.3
36.8	50.5	4.33	164	28.4	17.9	29.7	500	10.6	14.3	30.2
31.6	15.7	1	241	13.5	28.1	47.8	461	9.65	14.6	9.82
30.8	24.6	4.61	12.6	8.28	35.9	53.3	418	5.33	28.6	47
57.3	42.9	9.73	8.28	4.83	37.5	56.7	533	2.11	31.1	56.2
33.1	21.5	20.7	30.5	20.2	130	259	4217	2.37	14.9	50.9
31.9	13	24.4	41.8	15.1	18.3	34.9	457	6.49	20.2	49.1
49.6	31.1	84.3	186	129	39.2	59.4	426	3.62	21.7	33.4
49.6	27.4	9.22	12.2	23.3	9.31	13.3	255	10.2	26.9	42.9
50.5	45.7	9.14	13.2	1.18	30.8	56.2	685	1	28.4	1.31
179	121	38.2	433	126	37.5	57.8	533	9.82	20.4	79.9
15.5	22.1	3.08	50	9.31	36.2	53.3	359	25.7	70.4	117
26.2	26.7	14.9	23.9	37.9	6.38	26.7	418	6.73	29.7	32.8
34	14.7	19.1	24.1	34	55.2	77.7	445	20	29.2	2.04
27.1	13.6	12.3	35.2	13.8	32.2	45.3	449	2.64	9.47	6.1
59.4	40.7	12.2	286	64.4	45.7	76.4	1009	10.4	25.7	40.3
34.6	18.6	6.38	65.5	10.7	47.8	61	445	21.9	120	146
58.3	50	6.21	319	64.4	47.4	71	389	7.57	32.8	46.6
32.8	31.6	8.98	90.6	1.35	15.4	22.9	806	8.06	18.4	43.7
44.1	31.6	3	93.1	22.1	26.2	47	457	6.32	11.8	42.9
68.5	51.9	9.82	15.8	5.62	17	42.2	461	9.47	22.7	37.5
30	17.6	2.04	233	24.6	8.35	28.6	626	6.21	16.3	40
58.8	38.9	2.05	129	21.5	132	316	3338	10.4	20.4	32.8
34	21.9	2.81	649	133	91.4	248	2839	8.66	31.9	44.1
132	52.8	10.6	241	36.8	25.3	36.2	343	4.18	23.5	37.5
31.9	17.3	13.1	15	10	30.2	45.3	449	16.4	34.3	114
46.1	28.6	2.17	183	23.1	40	88.2	2091	7.91	13.1	29.7
51.9	37.9	11.3	151	21.1	8.43	13.3	578	6.21	16.5	23.9
88.2	16.5	17.6	147	57.3	51.9	61	392	4.49	11.4	31.6
33.1	15	27.9	410	85.8	22.7	35.9	250	5.57	28.1	39.2
77	62.6	6.98	25.7	16	9.56	30.5	308	5.33	18.1	25
36.8	18.4	12.5	12.3	5.78	27.9	44.5	496	10.6	32.8	74.3
65.5	50.5	20.2	28.1	11	50.5	70.4	453	3.75	22.7	50
50.5	28.6	19.5	24.4	10.4	38.9	71.7	599	10	19.8	44.5
47	26.2	1	158	3.96	17.9	18.9	519	5.94	24.4	45.7
34	15.4	3.43	239	22.5	7.5	28.6	426	9.14	20.4	32.5
50	40	5.23	514	73.7	6.85	35.2	466	3.43	24.4	54.7
20.5	2.86	2.04	319	60.4	43.7	64.4	457	4.66	10.3	23.5
10.1	17.5	13.5	12.4	25.9	64.9	90.6	578	1	25.3	8.74
31.3	14.6	6.67	10.6	11.5	14.5	37.2	806	2.07	53.8	1.25
36.8	38.2	18.9	22.7	2.62	12.4	32.2	588	10	18.4	62.1
48.3	32.2	7.7	89	17	47.4	75	466	9.91	30.2	46.6
41.4	17.9	30.8	538	118	54.7	85.1	325	4.78	6.21	31.9
50	30.2	6.61	583	80.6	6.85	21.3	382	8.82	29.2	66.7
27.9	18.1	3.37	94.7	19.3	8.35	19.6	649	8.82	25.9	36.5
32.2	23.7	7.91	331	52.8	4.7	13.8	491	10.5	23.9	3.92
176	115	10.6	8.82	9.14	54.2	88.2	588	15.4	70.4	229
30	21.1	2.69	151	30.8	25.9	34.6	437	1.46	11.8	28.9
34.9	22.5	24.8	21.9	1.08	52.3	79.1	1055	6.15	8.74	24.6
30.5	25.3	21.3	25.3	28.6	50.9	82	346	2.15	30.8	3.82
28.6	16.8	1.43	184	24.1	37.9	75.7	1197	10.1	22.1	74.3
129	75	6.98	16	11.4	28.9	45.3	478	6.26	30.2	29.7
142	76.4	15.8	25.7	7.37	43.3	69.8	500	11.8	44.1	115
30	24.6	7.91	9.65	9.73	24.4	39.2	474	12.2	26.2	31.3
26.9	19.3	14.5	149	34	24.8	50.5	528	8.2	23.3	37.5
38.2	24.4	19.3	46.6	24.8	64.9	145	2996	7.57	27.9	35.2
31.9	17	2.64	147	42.6	30.2	53.3	509	7.1	25.9	54.2
41	22.1	10	121	25.7	48.3	88.2	1700	13.2	47.4	112
54.7	41	1	267	13.8	5.62	21.3	355	3.62	24.8	50.9
33.7	26.4	4.49	84.3	21.5	27.6	41.4	470	8.82	22.3	62.1
48.3	44.9	7.91	7.57	2.97	29.4	42.9	528	2.74	10.9	1.5
150	33.1	8.13	13.9	2.33	35.5	61.5	414	1.86	132	5.94
46.6	20	3.79	262	35.5	24.6	44.5	355	16.1	23.7	1
115	80.6	1	328	25	13	42.9	710	39.6	101	202
34.6	23.1	1.78	191	32.5	16.7	31.1	441	7.43	31.9	45.7
101	69.2	9.65	12.7	17.8	36.2	56.7	547	37.5	137	196
30.5	24.1	11.2	7.64	9.22	32.8	59.4	322	5.38	15.8	24.1
35.5	23.3	1.84	426	64.4	19.6	63.8	1252	7.43	20.4	23.9
101	98.2	12.5	7.57	17.8	28.4	50.5	835	4.45	15	27.4
62.1	38.2	9.39	237	48.7	24.1	37.5	466	9.06	27.1	53.8
37.2	24.6	6.04	83.5	16.7	9.31	25.3	284	4.57	19.3	32.5
48.7	50.9	13.1	46.1	10.5	20.5	27.9	578	9.31	25	30.8
33.4	15.3	24.6	29.4	10.3	9.39	25.3	737	3.75	27.4	40.3
35.9	25.5	1.58	151	15.5	11.8	32.2	679	23.3	117	505
119	84.3	29.4	483	163	25	38.2	379	64.9	241	392
28.1	17	1.83	191	24.8	28.9	45.7	461	7.84	22.5	3.22
59.9	58.3	5.28	52.3	9.14	22.1	46.1	487	10.7	24.4	85.1
29.2	14.2	11.5	111	36.5	5.67	35.5	300	6.79	15.1	47.8
28.1	19.5	36.5	176	58.3	47.8	72.3	300	11.1	37.9	83.5
18.4	16.8	7.37	12.3	14.3	27.9	45.3	403	7.57	13.3	46.6
51.4	34.6	19.3	16.5	6.92	18.1	29.4	328	7.3	19.3	59.4
36.5	22.1	12.6	95.6	47.8	6.32	24.1	362	6.85	25.9	74.3
35.9	17.8	9.39	10.6	2.97	47	59.4	403	6.73	23.5	43.7
41.4	32.5	8.13	15.8	6.44	23.5	44.5	474	9.47	20.4	46.1
31.9	23.7	20.4	97.3	31.9	21.7	36.5	453	10	30.2	68.5
29.7	12.7	15	7.77	17	18.8	50.5	528	7.37	22.1	21.5
33.4	21.1	1.73	204	30	58.3	95.6	491	23.7	60.4	95.6
31.6	26.9	1.63	294	28.9	20.5	35.9	389	6.73	21.5	34.6
26.2	16.1	36.2	19.1	46.1	17	31.3	372	6.55	35.9	49.1
28.9	12.6	21.3	32.2	32.8	24.1	30.5	313	7.7	36.5	34.9
25.3	23.9	68.5	346	100	37.5	66.1	1065	6.26	26.9	62.1
28.4	18.8	1	449	67.9	43.3	57.3	433	8.74	21.3	17.3
27.6	7.1	3.31	188	25.9	33.7	50.5	429	7.5	13.6	21.5
84.3	56.2	3.13	52.8	5.99	52.8	85.8	523	6.55	37.2	94.7
73	61	12.7	20.5	12.3	51.4	62.1	328	6.49	21.1	38.5
23.7	26.7	12.9	12.5	13.2	34	50	542	5.67	18.3	19.3
25.5	25	79.9	514	137	75	111	578	14.5	42.2	3.28
80.6	48.7	6.79	105	27.9	21.3	50	365	11	34.6	57.3
34.6	26.9	2.41	186	20.9	60.4	125	1611	7.3	19.5	38.5
51.9	39.2	8.82	14.5	15.1	6.21	9.22	165	25	78.4	276
21.3	19.6	19.3	292	84.3	31.3	44.5	410	5	20.5	32.8
63.2	42.2	24.6	379	93.9	18.3	38.2	466	35.2	98.2	286
30.5	20.9	36.5	52.3	20.9	17.2	39.6	375	16.1	31.3	8.51
45.7	30.2	27.4	17.9	33.7	34.6	62.6	1420	26.4	86.6	145
33.1	17	7.77	64.4	15	14.5	44.5	400	12.4	29.2	40.3
44.1	26.2	11.3	16.8	13.2	23.9	79.1	1540	14.9	48.7	92.2
188	132	21.1	267	39.2	21.3	42.9	284	6.98	22.1	33.4
30.8	25	15	9.56	13.7	38.5	56.7	267	5.67	21.7	34
34.9	34.3	8.06	297	77	33.7	47	461	3.68	20	37.5
149	90.6	3.46	170	31.1	5.78	34.9	403	8.13	18.4	30.5
92.2	67.3	15.5	237	64.9	16.4	37.9	407	1.18	8.35	29.2
36.2	17.6	10.4	5.05	5.42	46.1	78.4	461	7.1	18.1	31.9
22.1	24.1	9.56	8.51	3.13	14.9	41.8	828	8.82	25.5	42.9
77.7	50.9	17	22.1	45.7	24.1	44.5	500	5.23	26.9	25
34.6	31.9	7.1	264	37.5	22.1	77.7	2110	12.4	36.5	53.8
73.7	48.3	4.1	143	37.9	25	49.6	449	40.3	45.7	11.2
40	24.1	4.78	500	57.8	18.4	34.6	750	8.28	23.7	38.9
29.7	23.7	11.2	297	69.8	55.7	67.3	583	9.14	17.2	22.9
120	97.3	4.49	8.82	8.51	30.8	46.6	453	6.55	26.4	32.5
31.1	28.6	7.7	11.7	16.7	31.3	56.7	407	20.4	67.9	123
191	161	13.8	13.5	12.7	22.5	35.9	583	7.3	24.4	39.2
43.3	40.3	2.37	392	75	38.5	94.7	1275	9.47	19.8	29.7
36.8	19.3	46.1	346	149	22.7	46.1	500	7.99	23.7	38.5
27.6	33.4	9.22	17	10.7	16.8	24.4	437	1	54.2	3.28
66.1	50.9	41.4	11	51.4	12.4	27.1	340	2.97	20.9	32.2
62.6	35.2	15.5	274	49.1	12.3	28.4	474	45.3	89.8	16
34.9	17	15.5	26.2	11.4	25.3	46.1	331	5.73	15.5	33.1
20.4	23.9	8.13	60.4	8.74	22.1	35.5	407	11.9	40.7	62.1
114	84.3	3.28	175	40.7	136	311	4411	6.32	22.1	36.2
31.3	24.4	6.15	61.5	8.35	31.1	51.9	365	22.9	85.8	172
15.3	5.19	3.43	279	20.7	24.4	51.9	523	8.51	65.5	37.9
69.8	42.9	50	47.8	33.4	22.1	37.2	1000	6.21	16.5	37.2
30.8	22.9	7.37	34	10.9	38.9	64.4	1134	10.3	29.4	66.7
130	90.6	2.25	385	48.7	13	36.5	764	8.28	16.7	54.7
132	75	5.23	14.3	4.87	25.9	28.9	519	42.6	122	205
18.3	46.1	1.35	191	20	5.05	33.1	400	8.98	22.1	26.4
39.6	36.8	12.2	7.99	10.6	19.6	31.1	325	9.31	17.3	9.39
85.1	56.7	10.6	16.1	23.3	45.3	53.3	352	23.3	54.7	4.1
124	106	21.9	47.4	20	12.4	44.1	874	10.1	49.6	34.9
55.7	28.9	11	284	40.7	38.5	62.1	392	8.28	28.4	50.9
133	96.5	11.8	257	34.6	40.3	63.2	429	9.47	15	5.09
80.6	52.8	10	9.91	7.77	42.6	48.3	445	1.55	12	37.9
139	68.5	1	175	25.9	31.1	62.6	588	5.99	21.5	34.3
18.9	32.2	5.99	8.9	1.06	77.7	123	973	8.51	16.4	35.2
79.1	70.4	11.2	135	24.4	24.8	73.7	1009	12.6	40.7	50
67.9	79.9	1.91	108	22.5	25.5	49.6	813	15	41.4	42.2
29.2	24.8	14.3	15.7	7.3	30.2	44.5	352	13.9	82.8	106
63.2	34.3	1	153	16.3	26.7	48.3	461	5.52	21.5	26.2
26.4	28.1	8.13	10.6	13.8	6.92	38.9	239	1	42.6	3.19
69.2	52.8	7.43	297	74.3	34.9	69.2	874	10	24.8	23.5
39.2	26.2	25.9	500	145	5.23	20.2	297	7.99	23.9	12.7
108	97.3	21.3	17.2	15.8	11.3	29.7	487	7.5	31.9	33.7
15	16.1	30	281	85.1	28.4	49.1	599	11.7	36.8	55.7
106	66.1	24.1	209	60.4	40	79.9	2227	8.9	39.6	57.8
37.5	23.3	1	433	47.8	21.5	43.7	649	10.3	34.3	44.1
119	124	10.5	17.2	13	30.2	41	396	5.28	14.2	8.58
37.5	20.5	8.35	11.7	13.7	7.84	31.6	466	11.7	19.5	27.6
69.2	55.2	6.55	73.7	15.3	50	77.7	389	20.4	71.7	49.6
141	120	2.69	122	20.7	25.7	52.8	257	8.2	27.4	71.7
32.5	27.1	6.26	103	6.98	7.77	21.9	365	6.92	17.5	26.2
29.2	20.5	11.4	9.06	13.2	6.44	15.8	410	20.9	50	53.8
48.3	40	1.12	109	13.5	40.3	49.1	355	7.23	32.2	44.5
38.5	18.9	12.3	17.5	26.2	41.8	80.6	1731	9.47	11	25.9
237	153	3.85	164	17.9	15	57.3	578	4.03	17	44.1
30.5	9.91	11.9	18.4	7.17	45.7	80.6	1433	4.61	35.9	37.9
44.5	22.3	15.7	176	50.9	21.5	24.4	308	7.04	14.7	26.2
39.6	30.5	3.79	102	7.04	20	40.7	567	15.7	71.7	99.1
172	129	3.79	72.3	6.73	56.2	80.6	331	16.8	25.9	41
53.3	72.3	31.6	221	48.7	41.8	58.8	557	17.5	60.4	119
33.7	21.5	18.9	17.2	46.1	22.1	106	1762	9.47	16.4	28.1
75.7	61	1.63	124	15.4	60.4	133	2017	1	5.67	13
42.9	13.7	7.23	57.8	32.8	27.6	44.9	365	12.2	31.9	73
93.9	55.2	22.1	189	34.6	86.6	195	2308	5.28	20.9	24.4
40	37.2	14.6	111	26.4	10	26.7	730	1.27	22.1	41
87.4	47.4	6.44	13.1	7.57	24.8	37.9	346	10.1	19.8	44.5
157	34.3	6.21	30	12.7	22.1	36.5	509	11.5	36.8	64.9
24.8	20.7	7.99	133	27.4	36.8	66.1	667	7.91	16.8	33.7
26.9	23.5	5.23	73	5.14	33.4	54.2	279	4.45	33.1	42.2
173	141	9.39	6.55	15.8	47	158	1877	4.26	16.4	20.5
150	113	1	186	13.1	49.6	93.9	1685	10.3	14.5	28.9
39.6	27.4	11.7	11.3	10	17.2	51.9	1065	10.6	32.2	46.1
30	25.7	12.9	231	36.5	18.4	38.5	973	8.82	34	33.7
24.6	14.3	6.79	17.2	6.32	18.8	40.3	470	20.4	30.2	5.78
37.5	30.5	9.82	16.5	9.31	33.1	49.1	346	14.5	25	40
126	205	4.18	82.8	28.4	30.5	56.7	542	9.65	22.3	21.5
100	154	11.1	13.6	12.9	19.5	68.5	1655	13.6	32.8	50
32.2	18.9	10.6	6.73	15.8	29.4	52.8	418	6.67	449	6.55
32.5	27.6	50	300	108	58.3	62.6	302	7.37	10.3	35.9
77	58.3	25.9	25.9	25	28.4	82	1827	4.1	20.7	48.7
26.2	14.1	34.9	45.7	25	44.1	57.3	410	4.66	21.5	31.1
99.1	65.5	28.1	67.9	26.7	44.9	60.4	365	13.5	37.2	52.8
83.5	61.5	9.82	8.06	1	43.3	136	2072	5.73	29.4	25.7
40.7	30.2	1.03	29.2	17.5	21.3	31.9	331	5.73	46.1	44.9
127	77	8.2	18.3	6.73	29.2	60.4	474	28.9	83.5	213
33.1	31.3	1.05	59.4	20.2	31.6	58.8	991	6.61	25.5	29.7
117	87.4	1.7	93.1	22.5	66.7	89.8	433	9.14	16.3	36.8
29.7	28.4	3.75	155	14.1	28.9	56.7	372	6.1	16.7	31.6
57.8	31.3	24.8	25.9	11.2	34.9	45.7	325	5.14	23.9	31.6
119	97.3	4.41	403	62.1	55.2	117	1582	4.7	20.4	23.5
31.9	14.6	8.9	22.7	7.77	37.2	59.4	392	17.3	38.9	44.5
57.8	49.6	8.66	15	5.57	33.1	49.6	319	8.9	15.1	18.9
85.1	85.8	5.73	514	71.7	75	100	449	7.43	7.43	1.06
33.7	16.8	3.43	101	31.9	5.09	7.91	202	5.62	26.9	30
38.2	26.7	3.79	160	26.4	21.1	57.3	956	1	1.83	5.14
45.7	23.3	9.56	4.57	10	31.3	51.9	359	26.9	98.2	198
137	93.1	30.5	219	175	47.8	99.1	1715	6.21	26.7	47
161	111	7.43	59.4	9.65	16.8	28.4	437	6.26	15.8	22.1
47.8	30.5	3.49	112	6.26	25.5	40	346	26.7	109	168
38.9	34.3	40.7	35.9	35.2	36.5	87.4	1395	10.5	11	38.9
47	42.2	6.98	799	135	53.8	93.9	1486	11	35.9	51.4
25.9	14.2	5.09	340	48.3	56.2	79.1	457	6.21	22.3	28.9
71	64.4	19.3	274	71.7	22.1	49.1	1197	13.1	27.6	49.1
49.6	46.1	5.52	281	47.8	23.3	44.9	509	8.98	16.1	36.5
32.5	29.4	24.4	237	59.9	10.8	27.4	692	8.98	21.7	41.8
7.99	24.8	29.7	429	106	55.2	75	573	14.9	40.3	71.7
34.3	28.4	40	50.5	23.7	20.9	39.6	248	4.22	10.6	29.7
35.9	32.8	10.5	59.4	21.1	28.1	49.6	461	5.05	11.4	29.4
25.7	6.79	66.1	136	43.7	6.79	14.5	264	10	29.7	50.9
118	86.6	41	89	297	42.9	97.3	1298	4.87	13.5	17.9
40.7	23.3	25.9	491	114	42.6	55.7	599	9.31	24.1	34.3
26.4	26.7	10.7	17.6	4.49	24.4	35.9	500	9.82	48.7	94.7
93.1	120	13.8	433	72.3	130	267	2738	8.98	23.7	27.1
28.9	27.9	3.85	146	28.4	13.1	27.6	743	8.2	13.7	2.64
34.3	15.7	8.06	292	40	5.78	18.1	414	26.9	77	135
22.7	15.1	2.17	19.8	9.65	34.9	64.4	644	2.04	31.3	1.72
34	21.5	12.5	24.8	20	19.6	23.3	297	11.2	28.4	59.9
93.1	66.7	5.14	23.5	15.8	26.9	63.2	906	13.5	23.5	41
32.2	24.4	5.99	106	13	337	519	2035	6.67	12.2	26.7
44.1	32.2	10.1	441	69.2	79.1	219	1860	6.85	18.4	32.2
71.7	49.1	2.19	46.6	29.4	15.4	29.2	667	12.6	33.4	59.4
58.8	12.7	10.8	13.1	2.39	44.9	59.9	396	10.7	49.1	59.9
241	297	6.92	79.1	10.6	46.6	77.7	346	26.4	89	119
12.7	16.3	8.98	7.23	5.88	20	44.1	914	13.8	36.2	90.6
74.3	69.8	4.45	764	120	43.7	60.4	578	10.9	34.6	38.2
74.3	66.1	12.7	40.7	12.2	20.7	38.5	407	11.1	24.8	45.7
68.5	32.8	24.8	23.9	12.7	45.3	77	1104	5.19	22.9	47.8
10.4	5.57	8.43	385	98.2	68.5	141	1459	8.98	28.6	27.4
10.6	9.22	19.8	250	44.9	44.9	106	1625	9.91	37.2	82
47.8	32.2	45.7	213	58.3	42.6	86.6	1395	5.47	30.2	30.8
67.9	51.4	2.27	1.53	316	64.9	154	2813	10.6	47	62.1
47.8	27.6	1.86	127	12.5	37.2	61.5	457	4.53	20.7	30
35.2	21.1	1	132	29.7	47	66.1	355	30.5	61	104
18.3	23.3	6.15	27.9	10.8	41	67.3	346	7.43	43.3	41.4
41.8	35.5	14.6	8.51	11	19.3	25.9	302	6.04	24.1	41.4
64.9	37.2	4.53	372	67.3	56.7	113	1395	8.66	14.2	47.4
125	99.1	15.8	271	48.7	35.5	49.6	474	4.91	6.92	29.7
38.2	28.9	4.07	44.9	36.8	22.9	75.7	1433	13.1	41.8	129
64.4	44.5	4.66	8.28	6.1	19.8	29.7	866	8.43	13.6	37.5
33.4	19.5	7.77	22.9	15.8	34.3	46.6	349	2.69	11.1	2.71
65.5	17	1.2	209	49.6	32.8	44.1	368	16.1	75	111
35.9	26.9	1	237	17.8	18.1	36.2	626	12.7	18.9	32.5
34.3	21.7	4.57	66.7	16.8	94.7	264	2503	5.52	15.4	16.3
47.4	36.5	1.32	346	34.6	16.4	42.6	1104	20.4	48.7	107
72.3	50.9	3.52	145	24.4	17.8	29.4	437	6.21	27.9	85.8
64.4	51.9	61	155	64.4	37.5	51.9	542	34.6	111	279
35.2	34.3	8.28	449	50.9	40	62.1	382	3.31	18.3	38.5
93.9	60.4	24.1	26.7	20.9	36.5	64.9	382	8.51	39.2	44.1
98.2	74.3	3.37	284	57.8	21.5	46.1	813	12.1	31.3	35.2
90.6	64.9	1	172	13.2	50.9	55.7	483	10	51.9	64.9
36.2	16.3	8.82	30.5	9.91	61	88.2	583	6.49	23.7	41.4
101	74.3	4.41	5.83	7.5	48.3	70.4	407	7.84	12	1
32.8	24.4	1.18	87.4	36.8	17.8	48.7	1298	7.77	22.5	20
73	103	4.49	28.9	7.7	31.1	49.1	389	10.2	32.8	49.1
50	31.3	6.1	85.8	10.6	34.3	43.7	334	9.22	38.9	48.3
36.2	28.4	40.7	441	73	34.6	58.3	478	35.5	48.3	3.49
15.4	24.1	13.1	13.9	20.2	34.6	50.9	334	5.83	14.6	57.3
87.4	97.3	18.4	235	20.2	5.62	17.5	890	5.94	16	38.5
28.1	18.8	6.73	284	54.7	29.2	63.2	1346	7.17	17.9	26.9
24.4	21.5	1	170	46.6	21.7	28.6	365	4.41	12.3	18.1
32.8	25.9	10.8	160	22.5	41.8	59.4	500	7.17	25	37.9
16	2.74	3.59	101	25.9	41.8	60.4	250	8.58	28.9	29.2
30.5	16.1	8.51	11.1	13.6	13.7	34	588	6.79	16.8	36.2
84.3	64.4	13.2	269	37.9	6.98	40.7	403	10.5	25.7	38.9
61	43.3	7.17	183	30	41.8	74.3	1000	11.2	16.8	53.3
29.4	21.7	6.1	65.5	17.2	9.56	35.9	505	12.5	11.7	26.2
56.7	39.2	2.59	160	6.98	22.3	47.4	982	13.2	35.5	44.9
114	151	1	77	16.5	22.3	35.5	319	17.3	43.7	68.5
34.3	22.3	10.2	457	59.9	21.3	37.9	340	8.82	15.5	16
44.9	25	33.4	25.3	18.4	69.2	106	389	5.47	22.3	38.9
30.8	26.2	1.46	129	15.8	38.5	72.3	1420	5.57	16	22.9
33.7	24.8	14.2	300	54.2	50.5	78.4	382	5.14	17.3	34.9
109	77.7	10.6	10.8	5.23	61	129	2890	6.15	32.2	47.8
26.2	17.3	1.63	114	14.6	39.2	75.7	1596	5.78	23.7	53.3
40.3	30.2	7.04	24.1	6.67	7.5	19.3	352	5	25	49.1
31.1	23.1	52.3	750	237	16	58.3	552	8.51	30	40.7
93.1	53.8	5.73	160	40.7	50.9	95.6	1275	11	26.9	38.9
85.8	67.9	7.43	12.5	9.56	39.6	50.9	269	5.47	21.1	36.8
63.8	15.8	2.59	160	19.3	40.3	68.5	679	7.43	22.3	39.6
36.8	30.8	16	28.4	30.8	46.6	139	2091	6.26	20.9	22.9
29.2	23.3	1.79	500	73.7	55.7	105	1346	4	8.51	36.8
51.9	42.6	1.63	248	28.4	7.7	26.4	533	1	47.4	2.31
139	123	4.14	53.3	13.9	45.7	67.3	392	7.99	23.3	24.8
54.2	79.1	18.6	18.9	2.81	30.8	41.8	365	4.83	16.7	43.3
43.7	14.5	54.7	223	82	32.2	43.7	322	12.4	39.2	57.3
183	138	10.8	365	77.7	188	289	1370	11.9	35.2	102
34.9	23.9	8.82	12.7	8.58	35.9	44.1	325	5.94	21.1	24.4
22.1	24.8	34.9	103	19.5	18.9	37.9	547	20.7	70.4	91.4
131	143	4.41	81.3	1.21	27.9	52.3	308	9.31	18.3	25.7
31.9	27.6	42.9	215	57.8	25.9	49.1	441	9.14	26.9	50.9
145	98.2	14.9	176	10.8	28.9	49.1	400	13.2	39.6	70.4
32.2	28.6	12.3	11.2	3.82	12.2	29.7	599	5.57	20	39.6
108	76.4	8.51	123	18.6	23.5	31.3	322	12	52.3	60.4
15.8	25.9	11.4	63.8	17	22.5	47.4	433	11.3	39.6	51.4
18.4	30	3.31	235	13.3	12.6	22.5	573	7.99	15.8	37.5
44.5	37.9	5.67	124	17.6	43.7	78.4	1946	6.67	24.6	30.8
37.5	25.3	8.58	10	9.39	26.9	41	297	1.79	15.5	45.7
33.4	18.6	17.9	45.7	36.5	39.6	59.4	519	8.58	25.9	58.3
75.7	89.8	8.28	104	8.9	25.3	45.3	274	9.39	14.3	29.2
175	184	1	213	29.4	35.9	71.7	1176	9.22	10.3	9.39
59.9	40	9.56	11.5	4.57	54.7	123	2247	5.73	15.7	27.4
82.8	51.4	8.13	167	11.3	58.8	94.7	533	8.51	22.1	41.8
131	137	47	70.4	44.9	17.3	27.4	557	8.66	19.5	39.6
45.7	23.5	6.44	45.3	28.1	24.8	41.8	557	9.14	33.7	126
37.2	23.1	9.73	11.4	1.01	33.1	63.8	730	4	14.1	44.9
17	13.5	8.13	14.7	10.5	47	82.8	599	16	43.3	93.1
48.3	34.3	5.88	496	52.8	7.57	33.1	396	7.57	37.9	33.1
80.6	51.9	14.9	262	66.1	45.3	64.4	599	8.58	13.9	27.4
26.7	11.3	8.06	6.44	1	33.1	59.9	890	8.51	27.4	22.7
23.5	20.2	12.5	365	60.4	55.2	107	1263	2.94	22.7	20.7
24.8	15.8	24.4	209	32.5	11.3	33.4	621	14.2	42.2	89.8
42.9	22.9	1.32	79.9	18.4	36.2	44.5	505	8.2	22.7	29.2
34	29.7	51.4	77	90.6	4.45	16	231	10.7	27.4	75.7
33.4	23.7	8.98	12.9	1.93	93.9	213	2996	35.5	153	297
70.4	53.3	23.7	50.5	8.43	27.4	55.2	1197	12.3	28.1	38.2
30	28.1	7.04	106	21.1	7.1	32.8	418	7.37	18.9	22.5
44.1	8.13	9.91	14.1	11.4	23.3	35.5	316	9.65	24.8	56.2
39.2	18.3	1.23	7.5	5	8.98	21.5	505	39.2	101	253
27.9	25	5.83	131	16.1	43.7	89.8	1640	26.2	66.7	181
72.3	50.9	2.89	10.3	7.1	22.5	50	429	27.9	94.7	161
71.7	95.6	60.4	410	149	70.4	183	3106	8.35	14.1	37.9
33.7	24.4	20.4	14.5	10.8	62.6	97.3	1241	6.98	16.8	14.9
52.3	16.8	8.43	16.3	22.3	43.7	64.4	470	10.5	33.4	50
33.1	18.1	1.51	271	35.5	30	61	698	17.2	44.1	129
42.6	27.4	6.21	491	57.8	34.3	54.2	474	39.6	109	102
130	106	7.43	19.5	19.8	9.73	36.8	385	4.26	42.2	58.8
37.9	31.3	7.84	7.23	12.9	9.31	31.3	828	4.91	20.7	31.9
69.2	58.3	11.1	453	81.3	29.4	47.4	588	7.84	29.4	33.7
44.1	31.1	1	188	22.5	10.5	22.3	372	2.84	15.8	38.2
161	35.2	2.62	139	16.4	21.7	47.4	474	9.73	11	3.19
40.7	25.7	3.11	133	19.3	55.7	129	1894	6.98	17.3	13.3
58.8	91.4	19.1	16.1	16.4	63.2	145	1472	9.31	34.3	34
20.9	9.47	12.1	11	3.75	5.57	26.7	389	6.55	24.8	55.7
23.9	17.9	11.1	274	42.2	25	42.9	328	8.66	30.2	48.7
22.7	20	13.1	6.44	9.73	26.7	40.3	437	11.5	17.3	26.4
33.7	30.8	3.13	46.1	7.17	32.8	55.7	500	7.17	30.2	44.1
35.2	8.28	18.3	274	50.9	31.1	42.6	396	14.3	48.3	66.1
202	176	4.37	77	6.04	25.7	50.9	457	8.74	28.4	30.8
35.5	12.5	7.23	21.9	16	20.7	30.5	583	5.99	28.4	33.4
186	114	7.91	61.5	20.7	55.2	66.1	346	5.99	18.8	16.5
83.5	104	8.13	22.5	19.1	39.6	62.1	407	13.7	43.7	93.9
26.7	25.7	10.3	176	34.9	19.5	43.3	457	4.03	23.3	44.9
71	58.8	7.7	30.8	18.9	33.1	60.4	346	5.57	15.4	42.6
29.2	18.8	5.78	365	57.8	8.66	30.5	487	9.47	33.4	58.8
215	163	2.27	106	20.5	57.3	83.5	396	8.82	36.5	34.6
33.7	33.7	30.8	311	79.9	19.8	50.5	528	5.52	14.9	34.3
16.8	14.6	15.3	352	51.9	58.8	151	2458	5.94	20.5	44.1
97.3	109	8.9	6.55	9.31	14.5	50.5	1186	29.7	69.8	87.4
44.9	28.4	36.2	165	107	40.7	71	1472	8.51	21.1	38.9
102	138	2.59	131	1	38.5	58.3	400	15	40.3	69.8
118	71	7.57	25.5	1.84	57.3	122	2595	14.9	48.7	108
122	93.9	5.67	322	71.7	41.8	79.1	1370	20.5	69.8	101
46.1	27.6	2.19	27.1	23.9	20.9	40.7	661	25.7	86.6	129
25.3	20	20	33.4	41.8	4.14	33.1	219	9.39	28.6	40.3
98.2	79.9	2.71	79.9	27.4	25.3	36.5	588	11.8	19.3	40
40.3	27.9	10.5	157	32.8	19.6	36.5	362	10.8	27.6	54.2
58.8	46.6	4.14	9.06	6.38	65.5	108	692	7.84	23.7	32.8
27.1	20.7	2.74	1.6	2.97	37.5	53.3	375	10.9	42.9	40.3
36.2	34.3	17	267	72.3	34	67.9	523	7.91	8.58	16.8
30.5	17.3	20.5	14.7	16.4	21.9	38.5	403	10.3	35.2	58.3
56.7	45.7	5.47	1.39	10.4	38.5	51.9	392	6.85	45.7	34.9
34	28.4	3.92	77	16.7	42.6	57.8	965	8.28	22.9	18.8
77	53.3	18.1	207	67.9	57.3	73	453	6.92	28.9	42.9
264	219	6.61	6.26	11.5	4.37	23.5	205	12.3	44.5	97.3
53.3	50.9	6.44	11	12.6	18.6	40.7	445	23.1	66.7	131
40.3	28.9	11.7	331	64.4	7.57	42.6	362	5.14	20.7	49.6
125	89.8	5.33	262	40.3	50.5	72.3	649	5.73	34	31.1
113	82	5.94	10.4	12.3	29.4	65.5	1446	7.23	24.8	32.5
40.7	17.5	21.9	19.6	13.2	22.5	37.9	461	12.6	40.7	38.5
24.6	14.9	2.13	125	12.3	25.7	53.8	743	6.67	18.4	17.3
24.4	15.4	15.7	172	47.8	25.3	39.2	316	19.1	47.4	52.8
86.6	129	4.78	10.3	8.35	56.2	141	1928	12.9	43.7	26.2
106	75	33.7	346	63.8	14.7	35.9	710	6.67	7.91	31.6
179	126	7.04	362	81.3	31.9	54.7	965	5.88	4.33	22.5
20.7	24.6	1.55	337	48.7	50	89	1747	7.77	20.4	30.8
58.3	54.7	1.33	173	27.6	8.98	12.6	297	10.4	33.1	28.4
28.4	18.1	12	359	85.1	20.9	55.7	1114	8.43	27.9	56.2
73.7	64.4	8.13	16.3	17.8	57.3	127	1241	17.2	46.1	122
26.7	24.6	7.04	10.1	1.24	101	178	2414	8.28	21.3	40.3
27.6	25.9	1	235	29.2	6.15	17.9	429	5.38	17.2	31.9
31.9	22.3	3.65	83.5	15.3	32.2	54.7	372	1.7	39.2	5.14
31.1	25.9	28.9	25.3	31.3	10.7	9.06	346	7.64	11.5	29.2
153	126	25.9	150	61	57.3	97.3	422	1.91	7.77	2.59
111	143	11.2	12.4	3.72	28.4	36.8	331	12.2	45.7	45.7
94.7	56.2	9.56	8.58	10.1	24.6	36.5	505	1	106	1.36
84.3	119	146	133	79.9	19.1	32.8	414	35.5	81.3	122
22.9	24.1	3.28	200	23.3	22.7	38.9	328	10.7	30	28.9
49.1	35.5	5.19	97.3	19.5	26.4	40.3	422	2.15	13.7	1
48.3	37.2	4.41	13.9	9.22	26.4	51.4	429	5	25.7	42.9
89.8	59.4	6.67	135	30.2	257	365	1395	11.3	16.7	41.4
19.8	19.1	15.3	237	54.2	22.1	41.4	828	17.8	51.4	50
95.6	69.8	27.1	15.5	30	20.4	42.2	1037	3.59	18.4	50
18.9	12.3	14.3	573	114	24.8	44.5	500	21.9	107	129
89.8	73.7	7.04	8.98	11.8	32.2	56.2	365	6.79	22.9	50.5
163	209	7.7	18.4	6.26	24.1	52.3	939	16.3	52.3	77.7
59.9	47.4	3.34	96.5	12.9	27.4	48.3	325	14.6	43.3	41.8
26.7	26.2	5.14	4.7	13.9	13.6	32.2	396	8.51	16.5	43.7
101	81.3	1	205	37.5	21.1	39.6	262	9.47	10.2	46.6
186	143	9.31	487	77	30.2	50.5	433	7.99	20.2	23.5
28.6	20.5	6.1	125	13.8	36.2	57.3	319	8.9	6.04	20
120	90.6	37.9	319	79.9	31.1	46.1	359	28.4	82.8	198
103	94.7	1.38	97.3	5.67	41	107	1827	10.2	20.5	29.2
31.1	23.3	5.94	10.4	5.99	38.2	79.1	2017	7.37	22.1	34
110	96.5	2.86	120	25	79.1	110	487	8.35	25.3	30.5
31.6	17.8	1.68	108	7.17	44.5	106	1811	10.7	16.8	19.1
105	80.6	5.88	76.4	30.8	38.5	44.5	362	10	34	34.9
186	131	2.31	181	11.9	15.4	35.9	500	11.5	39.6	46.1
42.6	29.2	1	183	32.2	26.7	32.8	305	1	26.9	6.98
21.3	17.2	15	196	50.5	44.1	75	279	17	36.2	77
78.4	56.2	32.5	63.2	23.7	17.6	41.8	500	43.3	95.6	87.4
98.2	58.3	10	16	12.2	13	29.7	567	11	18.6	24.6
114	112	20	410	71	102	143	407	8.82	20.4	42.9
117	85.1	10.7	204	22.5	29.4	49.1	890	6.79	17.3	27.4
107	76.4	1	2.89	1.08	44.5	88.2	3078	6.79	18.3	37.9
5.47	18.6	1.36	147	22.3	25.9	42.6	667	6.04	27.4	25.5
23.1	20.9	1.1	429	34	12.6	23.1	496	48.3	173	325
108	79.9	13.5	453	104	19.8	36.2	372	25.3	66.1	195
89.8	71.7	3.79	11.9	14.1	31.3	95.6	1655	9.91	26.2	24.8
27.4	19.1	1.22	311	25.7	10.6	34.9	483	7.64	23.9	37.2
48.3	27.1	6.26	14.2	9.22	41.4	73.7	382	8.43	18.6	26.2
70.4	45.7	12.2	47.8	22.9	21.1	32.5	538	8.74	22.9	41.8
133	86.6	19.6	24.6	8.74	6.04	41.4	368	14.2	29.4	17.3
35.5	24.8	13	27.6	28.1	35.5	83.5	1540	5.88	12.7	18.4
28.9	23.1	9.56	259	51.4	64.9	87.4	799	7.99	20.9	52.8
37.2	37.2	4.18	19.8	19.1	34.3	65.5	311	4.45	19.5	42.2
106	101	29.4	286	77.7	34.6	73	1370	10.1	39.2	29.2
41.8	44.9	4.53	9.14	7.43	58.3	90.6	372	60.4	186	269
24.8	13.3	4.96	23.7	5.09	48.3	74.3	1124	1	163	3.82
108	75	10.2	6.44	4.03	43.7	83.5	1144	11	21.5	47
33.4	18.3	12.2	9.91	1.01	29.2	45.7	294	7.99	15.3	24.4
151	131	10.2	7.04	16	38.5	90.6	1911	11.8	23.1	46.6
74.3	52.3	6.61	21.5	8.98	8.2	24.8	519	17.5	34.9	27.9
30.5	23.9	7.43	5	1.37	21.9	45.7	355	9.31	31.9	25.3
31.6	22.7	22.1	132	25.3	35.2	50.9	449	10.1	31.9	20
79.9	106	7.04	81.3	22.5	82.8	193	3429	5.05	16.7	36.5
78.4	69.8	4.53	123	31.3	20.9	45.7	392	8.98	18.4	36.2
27.9	26.7	8.58	470	82.8	107	195	3752	33.1	76.4	114
146	175	18.9	322	82	17.5	39.2	1124	6.1	13.6	20.5
129	119	1	176	13.9	20.2	38.9	407	28.4	64.9	101
31.9	32.5	5.19	16	8.28	18.6	23.3	594	10.6	40	31.3
76.4	64.9	3.96	136	27.4	18.9	49.6	1310	7.43	28.9	42.9
26.2	12.5	7.1	14.5	8.66	9.82	39.6	626	5.09	11.5	3.46
42.2	13.3	6.21	449	64.9	19.8	33.1	604	8.2	19.8	32.5
117	83.5	3.55	313	40.7	46.6	65.5	325	9.91	18.1	36.2
37.9	15.5	2.86	45.7	17.5	16.4	31.9	340	2.21	23.5	38.9
27.1	29.7	7.17	100	26.4	12.5	32.8	457	12.4	28.9	48.3
26.2	20.4	51.9	389	108	12.2	33.4	764	8.43	22.1	19.6
153	83.5	5.88	8.28	14.3	32.5	39.6	410	4.41	24.1	30
30.2	16	1	334	32.8	36.8	51.4	638	5.14	14.7	23.3
60.4	52.8	28.1	20.9	14.9	56.7	111	1046	10.8	27.9	42.2
63.8	42.2	6.49	18.3	11.2	30.8	57.8	588	7.7	12.3	23.5
225	126	16	375	98.2	50.5	87.4	956	14.5	43.7	85.8
53.3	43.7	4.49	64.4	28.6	26.9	50.5	264	13.6	43.7	39.2
43.7	34.9	9.14	13.7	9.47	14.1	25	359	8.9	16.5	51.9
38.2	30.8	2.13	115	8.98	17.8	28.6	441	8.98	34.6	73.7
53.8	47	6.61	11.2	7.64	12.7	34.9	730	8.98	14.7	19.8
35.2	36.8	7.3	379	69.2	50.9	70.4	426	7.84	18.1	32.2
20.9	9.39	15.7	19.6	15	23.7	41.8	308	18.9	31.3	3.05
67.9	40.7	3.52	313	40	5.23	30.2	359	11.3	22.1	59.4
26.4	20.2	1.86	422	66.1	8.66	28.9	200	1.15	125	8.35
111	70.4	6.55	63.8	16.1	18.6	33.7	445	6.32	11.5	31.6
23.7	25.7	1.46	121	21.7	35.2	82.8	1134	5.88	16.7	23.9
12	19.1	39.2	44.1	16.8	24.4	34	407	14.1	44.1	137
31.1	7.3	1	505	76.4	31.1	44.9	385	7.77	19.1	42.2
89	95.6	16.5	60.4	27.1	12.6	48.7	890	8.43	16.8	36.5
17.6	10.7	5.23	46.6	32.2	27.1	45.3	346	10.6	18.3	16.5
42.6	18.9	9.56	433	94.7	37.2	59.4	284	10.8	28.1	43.3
85.8	115	14.9	22.7	2.97	13.5	25.7	441	7.64	13.2	20.4
18.9	35.9	7.1	13.7	8.51	47	53.3	349	30	63.2	107
30.8	24.1	1	414	56.2	72.3	163	2167	10.6	17.6	63.2
11.8	5.05	7.1	7.04	8.82	33.7	48.3	562	11.1	29.2	41.8
24.4	30	1	343	10.6	64.4	95.6	396	9.91	21.3	38.5
34.9	27.6	6.92	7.84	9.73	51.4	70.4	500	11.3	47	82
91.4	50.5	17	483	76.4	65.5	125	1407	6.44	20	32.2
87.4	59.4	2.02	77.7	17.6	23.9	39.6	311	7.23	32.8	36.2
26.7	22.7	5.57	130	26.9	21.7	46.6	655	19.8	60.4	202
27.6	21.9	16.8	422	94.7	69.2	101	1298	8.82	16.1	38.5
36.5	24.8	13.2	562	104	58.3	113	2267	4.78	24.8	27.6
24.8	30	2.84	122	11	31.9	56.7	407	7.99	19.3	17.8
50.9	23.5	9.65	135	11.3	7.64	27.1	319	8.06	46.6	48.7
91.4	107	6.38	9.91	10.6	50	77.7	931	2.62	36.5	5
104	82	21.5	359	113	42.9	70.4	982	5.19	19.5	19.3
27.4	21.3	7.43	12.5	1	72.3	167	3338	9.82	13.5	25
24.4	26.4	10.5	294	77.7	43.3	94.7	1640	23.1	77	160
31.9	23.7	1.42	281	35.5	36.2	74.3	1640	3.52	27.1	36.8
108	90.6	36.8	25.9	21.5	89	186	2763	14.7	36.8	47
64.4	48.7	2.86	70.4	35.2	33.1	57.3	514	7.23	33.4	61
27.1	15.3	6.98	57.8	7.77	24.1	42.6	305	8.13	18.4	47.8
58.3	48.7	13.8	6.85	1	26.4	50.9	717	22.1	56.2	157
37.2	26.9	5.14	7.04	5.09	18.8	29.2	352	10.6	37.2	73
9.39	12.3	3.82	130	1.04	22.1	36.5	441	9.39	31.1	51.9
27.4	19.6	8.28	9.14	12.1	28.6	63.2	1197	8.74	23.5	19.8
107	69.8	30.2	57.3	17	24.4	35.5	491	13.9	49.6	117
64.9	61	13.5	10.9	10.5	4.7	28.6	223	6.44	25.9	35.5
17.5	12.4	2.86	276	44.9	42.2	79.1	835	7.99	35.5	35.9
248	267	7.57	24.8	4.37	31.3	48.7	334	6.44	21.9	39.6
28.9	16	5.33	28.1	12.3	20.5	27.6	470	5.09	25	34.9
25.3	20.2	1.86	202	22.1	59.4	102	1420	9.06	12.7	29.7
46.1	26.4	19.1	20.4	10.7	44.5	75	649	45.7	75	7.1
50	14.1	17.9	16	4.74	32.5	50.9	422	6.79	26.4	39.6
69.8	58.8	13	6.85	10.8	28.6	37.9	209	9.31	35.5	70.4
45.7	31.3	19.6	15.3	12.4	11.7	31.3	621	12.3	21.3	56.2
22.3	17.5	12.6	379	68.5	23.3	39.6	343	9.56	43.7	40.7
40	26.7	1	188	9.56	11.1	31.9	799	4.41	10.7	37.9
30.5	46.1	8.58	50.5	11.5	29.4	50.9	334	10.1	37.2	40.7
85.1	61.5	2.25	528	57.3	26.9	53.8	1286	2.17	14.7	8.98
31.3	24.4	7.57	46.1	17.9	55.7	97.3	764	6.44	21.3	22.7
55.7	47	13.3	22.1	16.4	5.83	7.84	385	7.3	14.2	18.3
9.47	11.1	13.6	385	64.4	67.9	133	1928	10.3	17.6	79.1
108	137	9.65	20.9	9.65	30.8	52.3	325	8.98	20.4	21.9
9.65	13.1	10.2	39.2	4.14	14.9	47.4	1084	7.3	27.1	45.7
50.9	40.3	16.1	233	43.7	30.5	86.6	1611	4.74	22.5	24.1
22.5	35.9	23.9	40.7	20.7	29.2	47	403	11.2	19.8	45.7
84.3	54.7	12.7	19.8	15.5	59.9	179	1596	6.85	26.9	37.5
132	183	1.27	168	27.4	38.5	63.8	276	4.18	15.4	28.9
42.2	61.5	2.48	142	32.5	12.6	31.6	547	4.14	27.6	50.9
50.9	46.1	2.21	286	29.7	40.7	55.2	414	5.88	15.7	15.5
170	136	11.3	407	89	30	43.3	346	13.8	25.7	14.9
65.5	50	6.85	17.8	14.1	23.1	42.6	400	9.82	28.1	40
24.1	12.4	1	121	12.2	18.6	39.6	349	6.79	28.6	47.8
12.2	9.91	12.7	385	79.1	53.8	94.7	982	11.9	49.6	50.5
126	135	10.3	6.79	16	70.4	163	2148	10.6	30.8	50
31.9	28.6	14.6	319	73	35.9	54.7	389	11.1	22.5	24.4
89.8	109	5	26.2	12.5	10.5	24.6	557	2.33	204	5.19
89.8	73	10.3	12.7	1.3	34.3	51.4	410	8.82	20.5	25.5
46.1	27.9	8.74	233	32.2	69.2	158	2054	7.1	19.5	43.3
37.5	27.9	6.49	63.8	23.5	16.4	32.5	343	6.49	11.2	36.5
34	24.4	4.91	17	6.26	22.5	34.6	667	7.84	18.1	26.4
17	21.5	9.56	12.5	8.28	28.6	41.4	414	12.1	38.5	57.3
23.3	7.23	11	209	44.5	41	73	1065	9.56	43.7	33.1
97.3	72.3	6.61	58.8	14.1	52.3	106	1762	7.7	27.1	46.1
58.8	40	1.43	195	14.6	92.2	175	2267	4.53	25.7	23.7
78.4	63.2	3.68	196	15.1	15.3	43.7	661	4.61	13	41.8
26.9	23.1	1.11	175	21.1	59.4	102	1084	8.82	22.3	31.1
62.6	39.2	9.31	16.4	11.9	30.5	50.5	500	7.77	34.3	28.6
28.4	22.3	4	16.1	4.18	16.5	29.7	255	24.1	46.1	45.7
38.5	23.7	1.32	101	16.3	38.2	57.8	375	12	23.9	31.6
26.2	21.7	5.83	10.6	11.3	22.9	37.5	426	8.35	20	35.5
29.4	20.5	44.5	181	79.1	25	32.5	316	12.3	32.2	65.5
17	46.6	8.82	186	34.6	62.1	72.3	368	8.43	25	23.7
24.8	13.6	13.3	9.82	10.4	31.9	52.3	392	7.37	16.4	20
85.1	84.3	12	19.6	12.7	28.1	37.5	157	4.29	12.3	18.1
121	101	13.6	53.8	36.5	30.8	49.1	368	9.65	14.6	32.8
58.8	46.6	5.52	11.3	5.23	8.74	42.6	410	14.3	39.6	3.65
50	26.7	6.21	13.7	3.08	10	36.8	466	27.9	79.9	193
29.7	16.1	3.13	483	66.1	36.2	69.2	1055	179	257	11.4
34.3	28.1	1.19	143	9.31	28.4	67.9	2414	10.6	25.9	54.7
51.4	36.8	10.8	11.1	8.43	19.5	34.6	466	11.2	32.8	38.2
63.2	34.6	8.51	9.73	1.2	60.4	135	1640	8.35	27.1	37.2
173	110	2.53	267	39.2	22.1	50	400	7.17	10.7	49.1
113	93.9	2.97	445	67.9	22.5	79.1	1358	9.91	18.1	44.1
35.9	17	13.8	13.3	5.78	27.9	74.3	858	7.5	23.5	28.6
43.7	26.2	15.8	138	57.3	13.2	30	433	8.82	15.4	28.6
120	82	8.13	31.9	20.5	13	27.1	679	7.91	24.6	33.7
3.55	1.01	4.37	8.66	1.01	26.9	54.7	973	6.73	13.9	40
25	25.5	9.91	117	33.1	26.2	41.4	385	8.51	26.7	65.5
33.4	18.4	2.33	172	23.9	42.2	66.7	372	8.2	24.6	66.1
49.1	25	9.82	15.5	15.1	12.7	31.6	578	7.37	21.3	8.74
31.3	12.1	8.06	28.6	14.2	9.22	45.7	626	10.4	43.3	36.8
34.9	21.1	16.7	154	44.5	13.2	26.4	723	4.45	16.7	35.2
20.9	21.5	3.96	150	13.5	7.43	35.2	422	6.85	18.9	88.2
37.9	12.9	14.9	10.2	1.61	24.1	51.9	331	9.06	47	30
47.4	35.9	29.7	80.6	17	45.7	89.8	1263	5.42	26.2	51.4
48.7	38.9	18.9	349	69.8	59.9	133	1999	9.82	30.2	27.1
39.2	32.8	7.64	5.52	9.14	20	36.5	392	14.6	18.8	11.5
35.5	31.9	2	139	19.8	28.4	45.7	255	7.3	24.1	23.5
30.5	15.4	8.74	6.26	8.28	79.1	131	453	15.4	27.1	46.6
33.1	27.6	39.2	45.3	21.3	11.5	17.5	523	9.82	16.7	34.6
200	112	13.7	63.2	8.82	15.4	32.2	931	15.7	31.3	31.9
28.6	24.6	7.37	133	33.7	12.1	39.2	1000	7.77	22.7	38.5
44.9	23.5	1.13	445	43.3	7.1	26.2	276	26.7	82	85.8
16.3	14.7	20.7	35.5	5.33	33.7	52.8	319	4	8.2	4.7
63.2	39.6	9.31	161	47.4	16.1	36.5	382	9.65	25.9	13.8
33.7	28.9	5.38	12.5	6.79	10.1	26.4	449	11.1	26.4	28.1
33.4	23.7	8.66	8.13	1.88	44.9	99.1	1499	16.3	68.5	89
26.4	24.6	10.5	4.26	3.46	42.2	119	1685	19.6	41.4	44.1
62.6	73.7	21.9	78.4	32.8	25.5	44.5	337	41.4	130	143
26.7	19.5	6.92	47	25.7	21.5	33.4	461	30.8	86.6	259
22.3	24.1	5.94	19.8	8.66	11.2	26.2	461	8.51	24.1	41.8
102	66.1	11.4	7.37	2.09	35.9	65.5	770	9.82	25	35.2
26.2	18.6	3.08	10.5	14.7	74.3	129	1446	8.98	34.9	85.1
39.6	28.4	22.9	44.5	9.14	25.7	35.2	470	16.3	36.2	43.3
42.2	25.3	7.77	6.98	1	18.8	29.2	269	8.13	22.7	42.9
17.2	15	8.82	308	46.1	75	108	340	5.42	31.1	29.2
111	73.7	2.46	79.1	9.31	11.5	35.2	851	8.13	17	15.7
51.4	25.9	3.68	184	24.1	51.9	79.9	478	9.31	30.2	36.5
41.4	36.8	2.86	89.8	17.3	27.4	58.3	396	11	34	22.3
49.1	35.2	15	26.9	5.73	78.4	172	2227	7.77	19.6	17.8
