# Supplementary material
Source: ML conference proceedings conference paper supplement (https://openreview.net/forum?id=nrbR2F29vU)
Supplement: supplementary_material [file 11. cd3cd28icam2+g0076.xls]

## Sheet: Sheet1
praf	pmek	plcg	PIP2	PIP3	p44/42	pakts473	PKA	PKC	P38	pjnk
2436	3685	137	235	12.9	99.1	308	1459	207	1322	151
114	160	108	269	15.4	53.8	274	655	51.9	237	99.1
557	947	418	737	4.49	27.9	117	626	28.1	150	42.9
638	914	50.9	93.9	17.2	111	542	496	41.8	244	137
316	461	1055	1611	13.2	40.3	167	528	6.61	52.8	22.3
181	279	437	704	9.06	10	37.2	500	143	898	271
213	328	131	188	7.99	89	491	496	45.3	271	135
139	189	66.1	136	11.9	172	973	103	10.1	32.5	10.9
173	274	457	737	42.2	229	1298	1472	95.6	588	17.3
322	500	322	547	7.99	632	3078	655	38.2	250	1.51
1999	2738	146	281	23.9	45.3	219	750	6.92	13.3	30
389	588	264	445	16.5	28.4	139	119	170	1230	219
122	181	85.1	172	31.1	22.7	80.6	610	103	673	12.2
509	723	64.4	101	12.4	244	1286	1715	61	372	89
227	334	86.6	155	4.96	50.9	248	588	54.7	355	161
99.1	112	667	1075	24.1	73.7	362	784	3.82	12.7	15
175	231	131	225	8.9	6.44	15.3	22.5	26.7	204	6.73
1472	2129	655	1176	22.7	25.5	122	59.4	12.5	53.3	44.5
204	355	115	196	10.6	111	604	1472	31.3	193	34.6
1165	1685	1334	2072	55.2	28.1	135	562	53.3	334	12.5
161	269	269	470	35.9	111	509	1407	56.2	334	139
274	410	202	313	58.3	84.3	414	1208	4.53	28.1	43.3
248	389	1230	1860	21.1	60.4	422	76.4	21.7	93.9	61.5
372	588	17.5	47.4	8.74	125	604	1065	57.8	359	151
1046	1568	449	820	79.9	710	3491	737	16.7	75.7	36.8
286	375	235	418	21.3	119	588	533	50.5	316	1
157	274	461	843	36.2	98.2	528	567	10.6	71.7	32.8
461	723	231	422	12.2	50.9	223	470	104	692	145
281	414	143	259	10.6	111	661	523	108	717	123
621	1065	129	237	15.3	150	813	1459	118	851	129
269	426	375	615	14.2	47.8	221	562	26.7	146	24.1
305	445	34.6	40.3	10.4	219	1241	337	22.9	119	20.4
106	142	71.7	98.2	15	11.3	73	649	35.2	255	38.5
49.6	49.6	956	1582	19.6	372	1762	939	9.47	75.7	45.7
95.6	136	547	1114	56.7	578	3134	1124	1.07	29.4	15.1
359	470	48.3	53.8	39.2	200	1055	799	56.7	308	70.4
181	271	44.1	319	38.9	33.7	92.2	346	59.4	392	173
196	322	188	322	59.9	143	737	122	59.4	359	34.6
59.4	72.3	67.3	125	22.3	110	644	496	145	906	63.2
114	145	269	407	26.9	93.1	542	223	39.2	241	8.51
151	237	400	692	10.6	50.9	248	362	22.1	138	13.6
433	667	225	392	38.2	61	257	1124	14.1	69.2	42.2
813	1208	122	882	125	145	750	1843	22.9	129	71
173	244	215	433	4.41	50.5	264	621	4.91	69.2	7.37
274	433	129	246	30.5	145	743	50.5	13.1	63.8	32.5
122	231	77	125	6.98	31.9	168	19.8	18.6	108	133
1155	1700	173	271	8.74	557	2618	1731	2.97	28.4	15
154	165	142	248	9.65	105	519	947	62.1	433	40
239	349	143	248	2.97	219	1046	1358	75.7	453	69.2
355	453	15.1	28.4	22.5	158	843	1827	71.7	311	191
509	799	108	500	23.1	241	1241	737	33.1	163	59.4
1208	1731	64.4	110	8.58	233	1310	483	4.91	32.8	32.8
673	1055	418	730	17.6	81.3	505	604	17.8	74.3	45.7
62.6	69.2	47.4	81.3	6.21	117	692	200	103	441	158
124	176	85.8	160	7.77	10.6	42.2	264	48.7	284	70.4
770	1084	227	372	3.46	154	813	1124	63.2	302	66.1
100	126	231	362	3.4	491	2642	1322	24.6	132	58.8
403	610	69.2	828	93.1	172	874	457	44.5	267	17.2
257	410	111	196	6.38	70.4	372	939	79.1	457	168
1286	1827	204	346	13	10.9	44.5	474	82.8	557	31.1
141	229	172	276	50	79.1	453	496	23.9	38.5	21.1
55.7	112	66.7	66.1	21.7	163	906	567	70.4	362	139
175	217	168	274	18.4	36.5	164	59.4	12.4	119	35.9
1230	1700	53.8	79.9	35.5	89.8	466	1065	28.9	161	47.8
246	352	200	673	141	175	965	743	66.1	474	81.3
12.7	17.9	176	337	25.5	109	542	66.7	40.3	255	69.8
313	445	202	334	11.2	66.1	403	655	122	737	30.8
67.3	106	248	400	28.6	95.6	567	422	1.29	21.9	13.2
496	770	111	196	17.8	19.5	72.3	604	19.3	60.4	77.7
368	588	37.9	66.1	11	55.7	289	667	17.2	113	20.5
204	244	150	241	31.1	392	2054	777	58.3	365	44.1
137	183	75.7	113	26.7	13.9	65.5	698	21.5	117	40.7
305	552	183	294	15.3	92.2	509	457	2.53	29.7	42.6
207	331	100	195	19.5	55.7	343	528	72.3	528	75.7
215	337	9.91	255	38.5	181	965	2458	48.3	267	53.3
334	449	359	679	14.7	96.5	542	72.3	13.3	73	74.3
120	215	274	449	18.1	573	2788	1000	16.4	58.3	22.1
308	466	340	474	34.3	14.2	45.3	717	40	196	35.5
42.2	46.6	297	487	20.7	44.9	276	578	44.9	264	36.2
39.6	59.4	264	470	8.66	35.9	227	28.4	7.5	36.5	49.6
209	271	750	1334	31.9	217	1104	514	37.9	172	33.7
281	400	179	316	12.6	37.5	213	491	46.6	274	37.5
132	188	211	313	7.3	52.8	325	588	36.2	217	40.3
433	638	100	557	149	297	1611	519	51.9	253	55.7
183	225	58.8	167	17.6	136	835	594	76.4	496	127
308	514	135	248	7.37	37.5	181	542	28.1	170	23.7
127	195	311	519	22.3	64.9	331	352	58.8	289	37.9
1275	1827	112	196	10.3	90.6	457	16	4.22	20.5	30.2
186	235	325	604	13.5	55.7	343	538	89	466	22.5
105	155	533	973	56.7	153	898	615	43.3	257	31.6
325	491	692	1114	23.7	322	1794	422	53.3	284	35.9
69.8	109	426	685	23.3	23.5	82	389	66.1	328	84.3
1018	1446	253	441	11.1	75.7	449	621	63.8	340	44.9
76.4	57.3	9.22	50.9	18.4	82	453	698	53.3	328	34.6
59.4	63.2	77.7	138	32.8	67.9	340	1554	52.3	316	69.2
343	599	135	253	7.3	14.1	34	457	31.6	225	56.2
297	403	337	655	8.35	38.5	186	343	47	311	29.2
588	922	113	219	26.9	86.6	491	523	21.5	143	38.9
791	1197	389	710	37.2	191	1046	349	32.8	179	59.4
235	340	135	259	8.43	54.7	334	615	10.9	64.9	1
170	239	73	184	28.9	289	1486	649	5.23	34	53.8
644	1000	136	253	16.7	68.5	349	1322	6.04	38.5	45.3
284	414	35.9	62.6	16.5	204	1134	562	10.4	36.8	48.3
638	956	175	302	9.47	46.6	250	491	46.1	207	122
235	334	155	305	21.7	178	973	573	88.2	478	92.2
225	340	385	710	3.68	76.4	505	82.8	41.8	248	9.91
382	562	132	241	15.3	61.5	400	1459	58.8	355	27.9
2738	3924	223	337	7.1	65.5	334	1685	25.3	110	42.6
898	1407	52.8	89.8	19.5	25.5	112	461	20	87.4	60.4
193	264	94.7	205	10.3	14.2	44.1	334	22.1	142	18.9
42.9	34.3	196	325	20.5	77.7	437	426	36.5	147	66.1
1472	2072	305	449	31.6	178	922	457	93.9	685	19.5
97.3	126	478	743	20.7	93.1	466	106	50	267	62.6
85.8	123	231	750	90.6	82	483	578	64.4	359	55.7
92.2	91.4	215	578	57.3	207	1094	99.1	24.1	84.3	23.7
1155	1747	34.9	72.3	22.5	42.6	223	365	57.3	349	47
172	279	46.6	223	23.1	30.8	104	1065	59.9	271	233
143	229	221	407	1.78	77	437	45.3	112	673	51.9
204	308	250	445	34.6	294	1582	704	53.3	297	42.6
167	289	62.1	284	16.7	20.4	98.2	461	23.5	133	32.2
615	982	200	325	11.5	41.4	223	337	83.5	496	58.3
223	352	661	1000	25	71.7	382	509	84.3	638	45.7
72.3	106	221	382	4.83	44.9	284	337	33.4	164	35.2
300	449	61.5	562	59.9	41.8	179	1144	67.9	302	103
31.3	34.6	146	284	8.13	62.1	362	673	53.8	334	53.8
99.1	184	239	407	24.6	77	284	965	50	205	57.3
39.2	38.2	61.5	207	51.4	66.7	362	547	143	973	95.6
914	1370	264	437	12.2	69.8	334	1407	58.8	337	106
109	176	19.1	30.5	23.7	37.2	137	403	48.7	286	39.2
86.6	81.3	221	343	22.1	392	2091	2148	10	40	63.8
35.9	35.2	76.4	175	25	117	621	710	101	514	60.4
487	685	1000	1459	54.2	365	1894	491	106	246	191
478	723	16.7	101	20.5	615	3051	1084	10.8	51.4	20.7
2714	3889	931	1407	52.3	193	1134	552	58.3	365	55.7
78.4	205	25.7	26.9	20.2	108	626	533	55.7	337	2.44
400	547	621	1037	26.9	47	121	343	30.5	181	43.7
519	730	21.5	35.2	11.9	289	1670	552	47.8	305	20.7
225	305	167	294	13.2	274	1486	322	70.4	379	77.7
193	267	97.3	200	36.8	39.2	136	882	73	429	55.2
215	305	141	294	13.6	56.7	300	400	18.9	55.2	67.3
50	46.1	92.2	235	16.5	146	710	573	38.5	196	58.8
46.6	93.9	777	1275	18.6	35.5	146	528	22.9	165	20.7
1420	1928	939	1407	50.5	77.7	337	23.7	63.8	365	30.2
40.7	68.5	365	858	51.9	13	89.8	552	27.6	167	47
27.6	10.7	40.7	59.9	16.4	21.1	127	368	58.8	372	5.42
2035	2788	40	70.4	31.1	429	2329	799	91.4	542	32.2
453	661	528	882	35.9	20.9	93.1	632	39.2	68.5	9.14
365	644	110	191	15.3	96.5	487	604	89.8	437	87.4
41.8	28.4	15.5	229	22.3	71	355	403	13.3	42.6	44.1
193	308	523	931	32.2	135	717	70.4	52.8	316	225
1065	1526	81.3	167	14.5	62.6	368	947	14.9	73	19.1
213	308	133	229	44.1	195	1046	389	17.6	61.5	20.5
193	289	129	221	19.5	43.3	284	105	36.8	198	73.7
213	311	359	661	20.4	79.1	414	43.7	83.5	474	125
340	500	58.8	410	22.5	255	866	1894	37.5	130	66.1
1134	1582	48.7	78.4	16.3	44.5	227	828	51.9	259	90.6
132	198	313	547	30	62.1	294	638	19.8	100	50
106	172	466	813	14.1	40.7	264	717	58.8	319	73
57.8	72.3	48.7	835	124	38.5	264	583	48.7	281	10.6
956	1382	227	355	24.1	41.4	221	437	58.8	311	186
599	898	264	470	45.7	67.9	359	410	13.2	51.4	29.2
231	352	375	615	38.2	73.7	331	547	41.4	62.1	13.1
698	1104	1155	1715	34.9	11.1	47	457	5.33	17.8	30
1000	1512	155	239	24.6	59.4	305	400	40	183	54.7
188	292	219	352	32.8	49.6	225	655	50.9	355	67.9
56.2	56.7	385	626	28.9	24.8	138	445	36.8	161	53.8
164	213	799	1252	35.5	55.7	346	328	37.5	172	33.1
1009	1420	264	547	85.1	26.2	130	71	34.6	221	42.6
461	784	97.3	132	7.43	35.5	91.4	466	45.7	271	43.3
297	437	294	466	23.9	44.1	239	316	16.1	85.1	32.8
164	269	276	433	19.5	31.3	163	281	13.1	93.1	67.3
649	1027	41.4	51.9	16.7	72.3	418	500	62.1	365	170
130	184	396	710	16.3	118	610	533	59.4	349	57.3
196	286	433	730	14.7	97.3	599	470	36.8	233	28.4
231	325	24.1	55.2	21.9	53.8	331	528	26.4	121	73
23.9	32.5	1165	1843	71	50.5	217	237	22.5	86.6	84.3
130	191	209	730	30	204	1046	1582	42.9	274	32.8
122	65.5	109	213	16.7	147	710	692	51.4	313	67.3
253	372	445	777	9.47	11.7	44.5	372	44.9	239	64.9
316	445	48.7	294	13.7	75	396	890	23.7	89	47
27.6	54.2	81.3	150	9.06	33.1	173	757	41.4	215	31.6
1124	1554	743	1197	42.2	53.8	217	297	44.1	292	32.2
167	255	557	991	7.77	119	661	453	12.5	52.3	47.8
153	248	604	1395	183	43.7	217	389	37.5	195	20.4
217	191	213	362	20.9	42.6	241	418	79.1	509	50
241	319	426	743	61.5	21.3	101	567	16.4	63.2	24.6
433	588	22.5	58.8	27.1	146	710	496	37.2	223	56.7
1275	1811	108	195	13.9	57.8	331	573	59.9	308	163
85.8	124	69.8	129	3.22	32.2	135	799	16.8	83.5	39.6
30	41.8	22.3	193	43.3	28.1	167	389	56.7	325	75.7
227	316	400	777	25	39.2	205	375	16	38.5	13
64.4	79.1	235	449	13.7	16.8	70.4	241	51.9	328	49.1
931	1310	181	343	9.47	209	1263	487	29.4	137	23.5
466	777	806	1208	48.3	20.2	97.3	426	27.1	142	25.5
1037	1420	274	528	123	56.7	328	429	85.8	588	51.9
85.8	107	414	698	29.2	73	400	429	10.9	22.1	17.5
470	704	28.4	29.2	30.8	181	1009	632	111	750	42.2
673	939	121	470	75	20.9	77.7	615	85.8	449	50
82.8	103	82	124	17	179	562	1263	45.7	198	79.1
84.3	142	55.7	85.1	3.31	44.1	195	626	54.7	346	73.7
300	445	457	851	40.3	25.7	105	523	50.5	355	158
154	189	98.2	170	18.9	491	2480	673	64.9	355	20.4
843	1241	35.2	200	9.14	63.2	355	64.4	56.7	313	157
308	547	835	1275	15.7	26.9	99.1	533	40.7	155	50.9
145	164	61	221	24.4	103	562	407	39.2	259	20.9
181	271	72.3	379	67.3	41	235	474	31.3	139	41
1794	2393	200	365	30.8	55.7	311	770	11.8	60.4	27.6
66.7	88.2	313	594	29.2	57.8	352	519	39.2	196	37.5
241	375	28.1	49.6	8.51	52.8	279	784	4.78	99.1	2.94
1252	1762	368	673	74.3	23.5	179	538	70.4	453	31.6
131	213	308	496	17.2	47.4	241	542	39.6	189	38.9
52.8	73	1877	2788	60.4	32.2	121	437	33.4	155	50.9
1526	2227	69.8	269	37.2	26.9	107	514	30.8	153	38.5
914	1298	80.6	146	10.2	104	523	615	32.8	221	23.1
62.1	71.7	355	610	8.58	186	1084	542	25.9	77.7	62.1
274	426	145	372	28.4	50.9	196	533	47.8	239	45.7
38.9	36.5	188	365	23.9	52.8	294	346	40.7	207	58.8
58.3	87.4	528	1027	19.6	132	685	533	25.5	143	25
160	257	12.9	42.2	5.28	32.2	167	346	23.9	73.7	71.7
227	289	487	799	13.9	81.3	449	743	25.5	154	44.5
63.2	89	262	500	13	25.9	114	355	11.5	67.3	68.5
157	231	179	276	14.6	143	791	186	52.3	302	53.3
32.5	77	28.9	155	32.8	136	704	505	31.1	163	41
209	334	368	649	52.8	19.5	97.3	470	30	191	32.8
547	906	71.7	114	3.68	50.5	297	514	14.3	59.9	58.3
158	204	8.13	143	43.7	69.2	437	445	10.9	34	4.87
231	269	132	241	20.9	15.1	52.8	313	20.9	64.4	72.3
138	193	61	237	28.4	25	58.3	533	52.3	319	38.5
1252	1778	286	422	44.1	42.6	207	441	54.2	271	89.8
931	1395	205	302	28.4	26.9	71	340	31.6	170	38.2
130	198	181	313	16	96.5	562	764	30.8	168	27.6
103	176	164	237	12.9	255	1310	382	13.5	25.9	8.9
78.4	94.7	31.9	132	22.9	50.5	300	466	22.7	64.9	31.3
231	322	143	274	13.1	75.7	400	638	50.5	322	76.4
632	843	113	205	25	66.7	382	898	37.9	221	37.2
211	286	120	418	49.1	31.1	93.9	407	13.1	48.7	40.3
1230	1843	204	372	57.8	396	2167	1104	28.6	143	34.9
89	146	85.1	183	12.5	47.4	264	355	27.4	168	96.5
195	269	281	1186	160	44.1	248	505	33.7	195	5.09
55.2	32.2	528	858	25.5	274	1358	1358	37.2	205	41.8
1144	1611	98.2	195	11.9	311	1655	562	71.7	437	41
186	302	379	615	11	40	183	737	25	163	21.1
1055	1625	125	257	10.6	352	1894	1625	43.3	259	57.8
483	737	20	21.3	2	39.6	178	457	61.5	410	20
52.8	86.6	400	1208	235	621	3220	1275	37.5	225	27.4
95.6	137	75	153	17.6	61.5	313	407	18.6	121	20.7
211	322	114	542	71	95.6	528	542	20	47.8	28.9
302	437	217	325	5.42	610	2996	692	44.1	244	62.1
1275	1843	562	956	52.8	101	343	1346	39.6	176	83.5
533	813	292	487	17	57.3	362	1075	54.7	337	57.8
939	1433	441	698	9.91	41.4	239	509	54.2	346	55.7
67.9	93.9	137	244	17.2	61	349	73	21.9	149	39.2
178	284	147	267	14.5	70.4	352	1252	9.47	58.3	14.2
1499	2091	217	362	4.53	17.3	86.6	385	13.9	38.5	31.9
225	346	410	750	14.1	11.3	48.3	496	49.6	235	149
308	453	106	175	28.4	51.4	322	679	22.1	110	123
175	264	422	685	22.5	20.4	40.7	328	47.8	253	39.6
198	264	433	632	39.6	61	400	115	43.3	255	37.9
80.6	105	176	286	3.28	41	127	770	28.4	143	37.5
65.5	73	181	372	14.9	15.7	62.1	562	30	195	34.9
44.9	74.3	108	179	35.9	195	982	1778	44.5	257	21.9
204	379	505	851	17.5	45.7	257	538	13	42.6	52.3
223	365	213	362	10.3	33.7	178	588	9.14	49.6	33.7
87.4	167	121	638	49.6	170	956	505	31.1	193	25.9
478	770	207	349	18.4	94.7	496	542	44.1	255	38.2
58.8	125	346	542	9.65	101	547	441	39.6	262	57.3
147	176	191	429	50.5	132	750	103	27.9	160	31.3
55.2	58.3	316	638	20.7	26.2	132	730	28.1	141	42.6
231	343	67.9	269	16	59.9	352	328	39.6	223	41.4
322	478	389	685	9.82	500	2525	594	80.6	491	30.5
241	328	505	843	27.1	14.3	57.3	610	30.5	259	38.9
178	257	30.2	244	48.3	47	153	777	21.3	98.2	45.3
385	578	64.9	146	28.4	63.8	400	621	12.7	71.7	25.9
300	426	41	88.2	5.78	73.7	414	368	59.9	355	60.4
127	172	349	1370	188	84.3	311	1472	9.73	62.1	34
139	227	914	1625	77	56.7	362	599	16.5	91.4	15.5
244	322	276	457	14.2	83.5	449	604	31.6	223	61.5
1219	1794	219	389	18.4	80.6	441	396	27.1	164	51.4
193	311	75.7	120	17.3	173	947	470	18.4	77	27.1
562	906	13.2	32.2	3.92	48.3	235	542	36.2	191	46.1
56.7	47.4	241	470	3.92	35.9	149	583	23.9	143	33.1
157	223	29.7	73	21.7	54.2	188	457	14.5	48.7	49.1
418	578	286	1310	86.6	41	205	538	8.98	56.2	23.9
17.3	28.6	189	271	17.5	112	615	449	15.5	68.5	23.7
1433	1999	362	632	21.3	28.6	189	523	88.2	519	36.2
101	167	77	382	47.8	63.8	382	437	44.9	267	57.3
253	346	25	27.6	23.1	46.6	200	858	32.5	173	229
437	632	594	947	39.2	33.1	170	685	23.7	125	42.6
56.7	45.7	126	196	37.2	53.8	322	429	48.3	259	47
519	764	221	392	6.49	122	679	843	19.1	65.5	47
137	253	286	552	18.3	120	644	500	26.7	92.2	73
292	422	661	1298	56.2	31.6	146	474	50.5	302	47.8
63.8	71	44.9	77.7	7.57	60.4	308	528	41.8	233	45.3
359	542	313	478	14.5	149	898	334	27.1	142	46.6
2227	3220	78.4	150	7.57	36.2	94.7	445	47.4	297	58.3
737	1084	205	784	104	519	2943	922	36.8	157	36.2
227	334	225	372	12.5	10.5	13.8	311	21.3	129	38.5
164	244	27.9	163	34	95.6	583	146	46.6	302	26.2
231	346	429	750	38.9	41.8	123	562	15.7	85.1	41.4
40	51.9	379	621	32.5	33.7	155	429	33.7	195	56.2
198	294	31.1	114	22.7	30.8	150	542	27.6	196	21.7
141	221	53.3	82	2.67	107	655	487	29.2	141	17
1310	1827	126	237	18.1	126	784	777	33.7	223	43.7
168	269	205	352	34.6	67.3	334	1046	17.8	87.4	21.5
49.6	46.1	382	673	32.8	53.3	255	441	26.7	135	15.5
231	319	158	262	22.5	12.7	51.9	426	10.4	50.9	62.1
179	255	255	400	27.4	276	1554	474	32.8	165	34.6
106	136	155	235	8.35	47.4	271	750	37.2	231	38.2
557	843	30	57.3	3.19	26.7	142	730	38.2	184	67.9
94.7	137	286	441	13.1	42.9	223	71	24.8	154	16.7
2187	3051	139	271	11.9	248	1395	906	40.7	259	27.9
328	403	109	229	16.8	105	588	91.4	20.9	73.7	46.6
340	610	102	221	11.2	75.7	437	1382	25	125	40.7
101	300	157	271	36.5	129	791	382	27.1	131	46.1
160	229	21.7	85.8	8.06	79.9	478	1009	22.5	104	46.1
403	621	235	407	17.8	66.1	311	1208	40	205	48.3
289	241	385	649	5.52	41	209	599	31.3	167	32.5
509	799	4.1	5.38	496	4.7	25.5	202	27.1	67.3	30.8
661	991	453	820	58.8	83.5	164	289	22.9	97.3	21.7
578	939	23.9	53.8	1	10	39.2	528	15.8	82	31.6
59.9	66.1	40	69.8	13.9	95.6	644	491	42.2	294	44.1
253	359	164	276	19.8	276	1382	730	25.9	103	37.2
244	362	229	365	16	449	1999	1186	73.7	470	46.1
533	843	114	858	87.4	10	46.1	615	26.7	122	49.1
204	308	202	319	9.73	58.3	359	325	10.8	58.3	69.2
246	422	181	300	42.6	167	931	382	23.5	122	49.6
1685	2393	305	514	30	26.2	61	407	9.06	27.9	60.4
1499	2227	117	213	4.91	91.4	311	445	28.6	123	41
64.9	99.1	193	340	25	37.9	186	233	16.5	106	19.3
262	400	1046	1670	28.1	100	542	704	21.9	79.1	25
86.6	74.3	176	1298	139	65.5	349	610	40.3	246	61.5
679	982	175	717	71	17.9	25.9	533	9.65	47.8	58.8
1446	2091	108	233	4.1	114	355	2072	52.3	343	44.9
573	882	79.9	599	57.3	36.8	221	1700	44.5	237	106
874	1298	198	679	50.9	154	813	389	36.5	244	53.3
750	1144	78.4	233	20.4	36.5	155	491	8.98	37.9	65.5
60.4	97.3	229	368	19.3	35.5	154	828	30.8	202	44.9
328	466	165	505	40.3	29.7	125	621	32.8	181	36.2
42.9	39.2	139	241	7.64	483	2393	1176	87.4	615	48.3
474	799	414	730	37.9	27.9	119	621	10.6	80.6	35.9
196	267	27.4	262	14.7	58.8	267	289	111	723	67.9
120	153	18.8	38.2	11.8	68.5	262	578	13.3	98.2	41.4
227	340	139	262	18.4	10.2	74.3	253	38.9	225	58.8
340	496	160	269	30.2	83.5	505	567	8.43	74.3	23.9
365	542	207	362	15	55.7	286	343	25.3	153	36.5
410	562	223	368	38.2	109	562	661	43.7	292	10.4
55.2	85.1	209	385	16.5	47.4	259	274	37.2	200	8.98
147	235	274	437	25.7	474	2207	573	44.9	274	29.2
155	227	573	1065	67.3	22.7	96.5	355	16.3	91.4	17.3
284	400	615	1114	52.3	145	547	1298	38.5	150	32.5
2288	3429	704	1176	23.5	97.3	557	661	19.8	84.3	25.9
355	523	557	890	44.9	54.7	311	483	9.82	21.5	28.6
107	90.6	167	279	17.9	38.5	191	562	10	32.2	48.3
139	165	449	704	41	165	991	2329	61.5	340	157
131	184	121	965	142	17.8	50.9	704	72.3	441	48.3
81.3	139	176	233	6.67	40.7	191	308	50.5	284	26.9
231	337	219	368	16.7	30	135	573	10.6	38.5	24.6
49.6	54.7	167	253	25.3	32.2	105	538	12.6	51.9	29.4
523	828	882	1395	67.9	71	396	457	69.8	331	132
168	244	106	349	35.9	679	3429	965	26.7	106	28.1
799	1186	313	552	8.66	72.3	418	466	67.9	437	73
349	441	99.1	183	5.78	43.7	286	50.5	39.2	207	59.9
97.3	95.6	65.5	205	7.64	64.4	340	505	56.2	276	106
217	403	271	437	1.45	16.3	54.2	588	66.1	392	79.1
655	947	474	784	25.5	487	2458	704	36.8	157	70.4
71.7	115	179	322	32.8	9.22	42.6	453	71.7	466	51.9
213	311	151	723	85.8	49.6	257	368	41.4	284	34.3
250	372	183	322	21.1	31.6	101	403	137	730	47.4
874	1334	145	276	43.3	35.9	213	487	13.7	62.1	21.9
334	519	253	474	16.3	41.8	163	382	12.3	20.4	20.4
186	235	211	349	20	44.1	248	392	60.4	362	16.3
88.2	91.4	599	991	15.7	95.6	599	453	55.7	289	55.7
757	1124	112	189	17.2	61	382	599	21.1	94.7	37.9
160	255	292	523	29.7	67.9	365	457	99.1	737	44.9
449	679	328	466	9.91	133	743	67.9	78.4	523	82.8
40.7	33.4	500	956	69.2	1	6.49	26.2	21.9	124	40.7
25.7	113	170	331	24.8	14.6	70.4	514	47.8	316	37.5
246	340	22.1	122	11.7	213	1134	1286	29.2	129	57.3
42.2	73	271	403	40	96.5	578	632	43.7	239	53.8
105	139	57.8	137	18.8	65.5	382	85.8	23.1	124	65.5
552	866	44.5	75	5	64.4	392	784	58.3	337	44.9
965	1459	396	567	16.8	39.2	241	375	14.9	30.2	74.3
365	552	379	667	12.5	54.2	334	610	25.9	142	55.7
223	313	294	500	33.4	32.2	200	523	26.7	165	46.1
63.2	110	505	882	22.7	47	248	139	28.4	133	40.3
1165	1731	105	196	7.77	53.8	352	407	30.5	160	16.7
131	175	119	244	18.1	302	1568	1486	40.3	155	389
244	343	135	217	16.7	77.7	441	407	8.43	44.5	25.9
12.6	25.9	547	799	12	47	244	514	13.2	84.3	40
655	1027	213	375	31.1	14.5	77	491	71.7	396	8.06
253	340	223	349	42.2	59.9	349	583	34.3	173	45.7
71.7	114	83.5	567	26.7	63.2	343	973	56.2	331	46.6
1186	1762	150	302	27.1	38.9	82.8	229	51.4	305	64.4
114	196	235	362	12.1	54.7	346	509	46.1	286	59.4
528	784	7.7	2.71	13.5	34.3	189	523	27.6	56.2	8.58
302	445	302	478	37.9	69.8	365	487	18.6	99.1	42.9
51.9	63.2	362	552	10.8	175	858	1446	34	244	38.2
437	621	604	1075	23.7	85.8	422	55.7	45.3	274	31.6
44.9	58.8	158	217	8.13	41.4	259	437	34.3	164	54.2
79.9	71.7	352	583	18.1	267	1382	599	103	610	106
93.9	145	41.8	188	14.5	58.3	264	644	43.7	294	40.3
308	453	552	939	19.6	219	1230	466	82	483	50.5
227	449	73	667	61.5	106	621	982	49.1	286	52.8
126	154	164	269	23.5	85.8	392	2054	10.3	26.9	35.2
71.7	94.7	594	1027	50.9	418	2054	426	29.4	178	38.9
39.6	55.7	211	302	11.1	136	750	474	22.1	85.1	48.7
743	1134	179	294	15.3	11.3	46.6	418	50	313	50
104	139	359	578	15.5	66.7	349	422	63.8	422	40.7
956	1420	267	509	23.5	255	1395	131	11.8	44.9	40.7
229	294	449	743	10	71	389	519	25.3	155	36.5
453	573	31.9	47.8	3.75	44.5	225	578	139	898	24.4
355	505	50.5	81.3	10.9	94.7	514	305	95.6	673	35.2
547	820	173	328	142	319	1811	461	18.3	71	43.3
153	231	947	1625	27.4	104	583	418	20.5	99.1	33.4
178	289	281	433	5.23	133	777	533	8.28	53.3	29.4
179	204	297	487	21.3	158	866	343	21.1	102	50
445	667	163	244	47.4	248	1197	359	56.2	279	91.4
922	1382	449	770	37.5	65.5	418	352	44.1	225	31.6
13.9	18.3	552	882	33.7	154	851	410	15	59.4	40.3
302	445	72.3	178	19.5	13.5	48.7	375	8.13	56.2	65.5
1075	1540	137	264	7.84	18.3	80.6	352	10.9	83.5	52.3
193	136	47.4	77	3.43	62.6	302	509	42.9	235	107
167	211	229	365	8.74	10.7	47.8	91.4	36.8	219	37.2
276	433	470	799	10.8	44.1	267	519	50.9	271	74.3
262	365	328	474	21.5	44.5	172	1877	55.2	340	69.2
274	375	109	196	4.96	18.9	104	449	74.3	445	41.4
359	542	114	219	13.1	123	626	679	14.2	82	75.7
382	588	982	1640	53.8	142	717	1499	20	83.5	41
1310	1963	207	375	37.2	198	1124	523	49.1	233	106
77	94.7	239	372	8.13	11	66.1	95.6	15.7	90.6	49.6
189	284	906	1407	47.4	35.9	161	542	72.3	422	22.1
615	965	496	914	63.2	51.9	284	461	46.1	271	45.3
418	638	352	626	12.3	29.7	106	429	56.2	328	72.3
225	340	87.4	137	23.9	74.3	433	547	15	62.1	47.8
181	271	246	389	10.6	186	1055	562	44.1	262	22.5
63.2	79.9	791	1241	18.6	58.8	316	528	25.9	193	57.8
389	426	679	1124	41.8	61	382	407	15.4	114	43.3
457	685	237	433	13.2	36.5	248	79.1	13.2	56.2	45.3
39.2	43.3	17	28.4	5.83	77	362	422	17	71	40.3
209	311	36.2	95.6	5.67	51.4	179	1860	43.7	223	193
667	1000	56.7	343	30.2	46.6	241	474	50.9	297	30.8
32.5	43.7	209	368	8.43	188	898	1762	53.3	297	21.1
70.4	108	77	146	8.43	418	2148	2618	60.4	352	97.3
183	271	269	514	37.2	50.9	229	567	123	906	710
487	723	661	1197	27.6	483	2503	898	16.7	114	23.3
1582	2308	76.4	157	9.14	37.5	122	505	44.5	289	25.5
49.1	103	300	519	38.2	24.8	71	362	82.8	533	133
292	407	75.7	890	132	55.2	207	538	139	784	63.8
308	461	158	286	10.8	281	1433	1747	32.2	179	19.8
111	168	8.66	2.27	17.8	56.2	289	352	1.96	106	3.92
337	552	143	237	12.5	89	578	426	17.2	90.6	47
117	142	418	764	38.2	235	1298	750	30.5	176	36.8
375	547	149	297	23.5	45.3	255	514	37.9	207	47.8
365	673	858	1358	24.4	316	1794	1420	50	276	2.71
183	267	27.1	57.3	29.4	35.9	145	302	63.8	305	129
85.1	130	567	1512	44.5	54.7	300	552	23.5	124	25.5
93.1	138	453	750	36.5	102	487	632	35.5	235	22.1
193	279	85.1	355	15.5	58.3	311	874	21.1	102	61
22.9	35.5	27.4	22.5	25.5	75	396	704	49.1	227	40.7
392	557	246	433	34.3	58.8	319	519	1	124	5.67
965	1472	137	233	5.38	189	1055	259	27.4	163	47.8
717	1114	137	385	22.3	284	1568	533	42.2	239	43.7
193	279	20.9	32.5	11.1	77.7	461	514	36.5	205	62.6
382	496	292	1186	102	6.98	2.17	223	82.8	414	101
246	343	685	1134	6.1	264	1446	673	43.3	279	47
418	626	279	407	51.4	40	124	2091	111	730	68.5
227	322	16.8	39.2	4.37	75.7	365	105	8.2	34.6	25
137	233	88.2	308	4.87	264	1407	874	32.5	183	31.1
542	777	557	1009	60.4	302	1596	890	44.9	237	20.5
168	257	93.9	164	10	80.6	466	528	45.7	302	68.5
262	368	274	483	53.3	184	965	638	13.7	44.9	56.2
237	382	235	396	10.6	202	1134	414	15.1	92.2	52.3
292	478	237	362	35.5	47.4	122	698	42.2	241	57.3
505	704	209	349	38.5	48.7	225	1084	34	211	20.9
223	368	33.1	66.7	1.27	6.49	31.9	71	44.5	281	78.4
170	253	264	445	23.9	35.5	125	414	25	146	32.2
292	400	281	644	66.1	118	594	496	42.2	255	67.3
47.4	42.9	466	806	42.6	118	737	429	33.1	213	59.9
99.1	158	27.6	67.9	21.9	117	638	382	40	257	32.5
176	191	123	223	11.8	40	189	297	22.7	61.5	52.3
898	1298	86.6	337	31.9	93.9	567	379	37.2	246	73
217	305	70.4	858	92.2	621	3106	723	13.5	97.3	38.5
403	621	509	947	14.5	88.2	500	820	21.5	165	70.4
157	196	250	483	17.3	35.9	153	578	25.3	164	20.2
461	750	61.5	110	18.3	27.1	132	523	5.38	8.28	11
813	1155	237	422	26.7	132	737	547	3.37	15.7	1.25
365	533	202	400	1.01	63.8	379	302	26.2	119	24.4
221	328	132	262	47	100	523	445	14.3	45.7	36.5
115	173	130	461	55.2	14.3	54.7	343	30.5	151	43.7
1395	2110	319	487	3.16	28.9	143	973	16.5	62.1	31.1
74.3	141	567	982	16.1	9.65	34.9	346	62.6	375	62.1
542	813	158	259	21.9	202	1046	325	10	73.7	38.5
365	533	104	173	24.4	679	3368	1263	16.8	121	29.2
153	235	129	202	32.5	215	1230	649	41.4	250	50
1395	2017	474	799	41.8	44.5	284	866	40	213	10.3
1554	2371	1065	1685	17.3	54.7	362	47.8	16.1	26.2	12.3
150	239	50.5	77.7	16.7	59.4	316	828	22.3	117	35.9
71	80.6	63.8	102	8.35	68.5	355	457	42.6	269	17.8
599	828	145	255	10.4	246	1334	1843	46.1	269	54.7
172	204	294	533	3.89	94.7	433	385	69.8	418	100
72.3	94.7	28.6	57.8	19.8	204	1009	127	42.6	237	4.33
244	352	142	743	124	112	588	441	117	723	17.5
392	528	274	1065	146	42.2	85.8	528	38.2	231	24.1
202	271	764	1155	40.7	6.44	46.6	281	5.57	13.3	28.6
274	422	202	346	22.7	457	2350	1230	41.4	178	21.9
158	259	145	259	10.6	58.3	346	322	36.2	239	28.9
632	1000	75.7	131	7.37	281	1512	509	11.9	31.6	30
231	352	61.5	115	2.35	60.4	400	491	18.9	146	40.3
1104	1554	35.9	66.1	10.5	45.3	155	474	21.7	125	44.1
253	410	828	1286	33.1	85.8	445	573	27.9	168	26.9
281	426	235	429	16.8	143	843	552	15.7	91.4	21.5
248	375	205	349	4.96	41	198	372	102	599	111
59.4	99.1	328	594	1.1	1094	5233	1778	7.64	21.7	17.3
4.45	11.7	723	1165	47.4	161	922	599	38.2	176	38.9
29.2	22.1	155	407	70.4	24.4	103	799	90.6	547	57.8
437	588	142	433	40.7	14.9	58.3	588	11.5	37.9	39.2
188	235	615	939	20	104	542	26.4	10.2	40.7	35.9
365	528	429	1582	108	36.5	168	509	29.4	153	20.7
121	150	109	163	19.5	39.6	198	557	10	27.4	39.6
300	400	42.6	67.9	15.5	340	1843	583	29.7	155	25.7
207	294	246	410	49.6	69.2	389	737	31.9	124	46.1
246	349	281	441	27.1	104	679	542	13.8	45.7	24.1
496	770	828	1358	18.4	93.9	533	710	37.9	262	139
1472	2110	235	362	42.2	33.1	146	667	40	281	13.1
47.4	59.9	445	791	14.6	53.3	294	770	25	151	34.3
757	1144	11.8	31.6	11.5	59.9	322	55.2	13.5	49.6	24.8
189	297	93.9	163	18.3	54.2	365	626	41.8	262	17.8
621	965	184	289	305	40.7	219	407	5.57	19.3	9.39
135	241	173	274	15.8	407	2035	588	109	667	58.3
355	519	294	500	35.5	74.3	422	441	27.9	143	2.09
255	403	262	410	18.4	43.3	207	573	75.7	496	40.3
63.2	62.1	221	453	20.5	33.4	138	461	53.3	319	25.3
141	193	189	379	2.92	244	1298	414	20.7	76.4	58.3
626	1027	42.2	64.4	17.8	227	1298	667	12.7	60.4	30.8
939	1382	184	340	9.65	922	4451	1582	99.1	567	76.4
1018	1420	292	514	24.6	71	362	313	43.3	233	39.2
24.4	18.4	685	1009	36.5	241	1370	470	56.2	349	32.2
382	615	519	851	26.9	25.3	131	737	19.3	107	33.4
302	461	163	286	13.6	103	583	514	36.8	221	50
32.5	40.3	264	437	5.28	509	2595	1114	12.1	36.8	31.6
110	157	233	418	19.1	12.1	57.8	578	68.5	433	54.2
965	1370	44.9	193	28.6	47.4	269	311	8.2	58.3	46.6
410	583	57.3	78.4	17.9	269	1582	604	50	300	17.5
1963	2714	316	538	11.9	44.9	259	500	29.2	145	34
1433	2072	547	906	26.2	81.3	400	791	17	92.2	27.6
215	362	215	359	6.79	78.4	355	445	12.4	62.6	79.9
297	505	221	375	19.6	146	874	400	8.82	37.9	39.6
225	368	105	154	5	257	1382	407	61.5	379	44.1
43.7	55.7	204	491	50.5	35.2	237	523	34.6	202	41.8
193	262	379	644	51.9	106	523	939	7.37	36.5	17.5
2329	3278	70.4	205	15.3	65.5	313	578	12	63.2	37.5
538	874	198	583	82.8	85.8	509	679	7.7	23.9	9.14
225	294	7.1	127	25.5	35.2	170	474	18.8	81.3	22.5
25.9	64.9	255	1144	158	10.7	48.7	474	92.2	483	114
396	710	396	698	24.6	186	1084	414	36.8	183	154
170	248	215	389	13.9	302	1685	302	65.5	407	63.2
132	189	305	573	19.8	638	3134	704	40	241	34
1685	2480	375	599	42.6	136	692	175	25.5	115	44.1
142	205	108	172	12	109	632	523	35.2	191	55.2
241	362	382	679	33.7	104	610	382	33.1	154	54.7
523	813	289	470	11.7	63.8	365	519	4.07	32.2	7.17
74.3	120	127	205	4.7	27.9	176	1124	21.1	124	32.2
284	426	343	562	15.5	17.3	56.7	649	15.1	75	20.2
59.4	59.9	136	223	34	67.3	334	552	64.9	392	20.5
262	368	308	567	7.1	33.7	150	337	51.4	316	37.9
422	655	269	410	21.9	89	542	483	28.4	151	51.9
86.6	146	139	262	27.1	15.3	104	54.2	7.7	63.2	46.1
248	389	305	422	27.6	120	710	890	63.8	429	39.2
223	302	644	882	8.51	19.1	54.2	392	62.1	355	75.7
106	113	56.7	87.4	10.3	269	1382	947	24.8	139	28.6
125	184	429	791	17	4.66	31.1	56.7	27.9	76.4	35.5
181	213	229	890	45.3	73	340	1334	13.1	47.8	55.7
567	806	175	305	14.3	30.2	108	615	48.7	279	93.9
2436	3398	355	655	18.1	29.2	184	514	14.3	57.8	22.5
340	491	143	257	20.9	18.6	50	496	9.14	50.9	30.5
453	685	90.6	355	11.2	57.8	294	355	10.1	42.9	37.9
131	200	276	478	12.9	14.6	42.6	257	48.3	300	16.4
109	155	221	359	24.4	59.9	375	604	35.5	211	37.2
5.78	17.6	956	1554	22.3	80.6	437	594	35.9	221	33.1
1794	2690	189	1134	132	42.9	264	533	5.47	106	95.6
305	478	233	422	28.1	85.1	474	770	40	279	33.7
661	947	76.4	138	9.39	132	661	1700	13.1	66.7	35.5
1981	2763	223	379	16.8	478	2595	799	26.4	139	48.7
59.9	98.2	615	1009	51.4	118	610	496	13.7	66.7	28.6
835	1208	679	1046	15.1	55.7	337	523	45.7	281	46.1
698	1144	279	461	20.7	22.9	68.5	547	69.2	355	67.9
170	207	179	302	22.3	61.5	334	407	54.2	346	31.3
74.3	89	578	931	38.5	16.4	63.8	379	53.3	328	40.3
253	355	389	667	25.5	104	528	547	11.4	53.3	38.9
196	281	281	505	5.47	101	519	770	39.2	229	32.2
63.2	86.6	449	638	20.4	53.3	269	939	7.84	20.7	27.1
441	673	82.8	799	88.2	77	346	445	29.2	178	15.7
42.2	45.3	514	866	8.43	53.3	297	599	89	588	153
279	349	107	196	3.65	31.6	145	441	19.1	107	1.06
337	509	346	483	23.5	146	437	1263	40.7	246	24.6
9.56	11.4	235	355	13.8	31.1	89.8	649	25.9	125	36.2
294	400	209	346	15.5	6.38	18.9	170	13.3	68.5	53.3
117	151	101	191	20.4	44.5	262	433	18.9	68.5	22.3
710	1084	372	692	10.4	137	750	519	32.2	143	48.7
528	828	325	1027	44.1	10.6	40.7	764	40	253	23.3
75.7	111	514	922	29.4	38.5	200	375	127	851	121
42.9	71.7	914	1472	19.3	14.7	66.1	73	26.9	40.7	2.39
253	375	385	737	14.2	57.3	311	211	66.1	392	34.6
264	457	667	1124	30	44.9	264	410	66.1	365	198
362	542	112	193	25.7	53.8	267	297	33.4	198	20.4
235	334	457	743	25.9	9.22	32.8	313	76.4	457	106
34.6	41	14.2	43.3	23.7	91.4	478	403	30.8	154	52.8
127	219	382	673	16.8	86.6	470	75.7	36.2	231	30.2
267	362	175	292	8.06	14.9	78.4	615	25.7	93.9	50.9
62.6	63.8	343	552	25.7	20.4	141	1230	43.3	289	38.2
372	599	1065	1715	45.3	53.3	172	2308	38.9	233	67.9
1084	1611	466	770	21.3	141	806	101	40.7	237	40
2738	3889	36.8	196	33.7	125	644	328	44.1	316	51.4
241	368	311	496	6.32	41.8	188	466	51.4	343	22.5
1241	1794	126	233	18.8	98.2	487	478	20	95.6	29.7
43.3	73	281	392	11.3	49.1	267	588	20.4	139	2.15
72.3	90.6	483	914	37.2	10.3	18.4	346	36.8	239	44.1
661	1037	262	470	11.8	41.8	233	400	86.6	567	30
292	457	235	368	10.2	215	1197	557	164	947	167
91.4	133	898	1512	35.2	66.1	385	422	15.3	24.1	4.03
130	155	89.8	311	16.4	43.3	225	372	50.5	274	101
111	143	122	264	3.89	23.7	161	453	49.6	269	24.1
30.5	30.5	483	898	29.4	51.9	257	835	13	72.3	35.2
319	422	547	939	31.1	35.9	198	200	75	470	36.5
578	906	239	453	14.9	108	562	79.1	40.7	284	29.2
449	644	117	227	15.8	362	1928	487	58.3	392	20.4
117	213	276	449	15.1	78.4	379	509	41.8	302	34.3
615	939	396	991	106	49.1	259	538	64.9	355	170
313	441	136	457	67.9	51.9	246	723	34.6	225	58.3
77.7	98.2	813	1298	15.7	325	1811	385	42.2	241	41.4
153	225	99.1	163	17.3	52.8	137	743	23.1	141	23.3
368	538	11.8	21.3	35.2	27.1	138	294	24.8	167	26.9
349	533	610	1165	15.8	40.3	189	352	39.2	262	50
1046	1486	73	100	8.58	19.3	79.1	346	14.7	41.4	75
334	533	246	433	58.3	127	519	685	36.8	167	54.7
922	1407	211	1046	119	16	75	253	8.74	53.8	42.9
90.6	104	276	453	19.8	113	644	599	18.3	73.7	38.5
1018	1486	117	233	13.7	8.66	38.9	519	46.1	246	63.2
205	289	223	362	33.1	213	1275	400	21.9	87.4	18.1
213	331	552	914	21.3	71	382	649	13.7	72.3	25.9
165	246	215	284	15.8	109	552	441	84.3	466	100
200	269	117	813	63.8	132	673	1009	36.5	229	44.1
914	1420	112	225	13.7	153	828	429	37.5	211	54.2
143	281	83.5	198	18.1	98.2	483	60.4	58.8	365	6.04
142	253	191	328	12.7	20.7	93.9	655	25.9	131	24.8
229	328	90.6	184	13.6	461	2414	679	94.7	547	36.2
1778	2503	644	1037	23.7	41.4	233	337	117	743	5.47
85.8	127	78.4	130	25	25.5	121	237	84.3	583	43.7
227	322	578	851	51.9	44.5	300	38.2	36.2	164	50.5
319	414	20.9	21.7	11.9	26.9	124	311	90.6	578	73.7
588	914	294	500	6.92	89.8	426	445	51.9	319	51.9
223	313	7.99	12.6	10.9	72.3	375	599	20.2	127	40.3
1252	1747	40	39.6	56.2	308	1554	1459	18.4	104	32.5
221	269	63.8	248	30.5	173	820	3587	40	233	34.6
414	615	184	292	2.25	31.3	154	474	40	229	29.7
209	302	528	922	6.98	44.9	211	661	34.6	161	2.94
491	750	276	385	21.5	51.9	264	777	55.2	392	62.6
965	1554	649	1155	40.7	56.7	267	557	47.4	259	37.5
359	594	638	1018	30.2	29.7	147	578	45.7	279	36.2
1877	2690	73	375	6.61	474	2414	567	13.1	39.2	16.3
292	433	229	429	18.4	50.5	300	449	28.9	181	24.1
151	183	1027	1512	44.1	56.7	325	615	15	75.7	58.3
1055	1512	72.3	141	17.5	13.8	49.6	538	31.6	191	26.2
250	362	5.52	22.1	86.6	45.7	227	528	81.3	567	13.6
101	153	118	186	30.2	67.9	379	86.6	62.6	337	112
136	179	632	1219	29.7	31.9	141	437	55.2	368	15
32.5	34	890	1472	55.7	37.9	126	567	50.5	325	14.5
866	1208	19.1	22.9	8.51	352	1860	882	64.4	407	35.9
170	231	359	835	28.9	94.7	466	661	85.8	538	32.2
120	253	151	241	10.1	55.2	308	649	20	117	50
184	259	133	227	34.3	60.4	400	355	50.5	340	18.6
44.1	40.7	183	638	33.7	67.9	426	567	79.1	514	36.2
205	300	198	362	4.07	43.7	264	400	19.3	66.7	41
100	178	141	313	46.1	92.2	491	673	39.2	219	28.9
158	253	117	193	12	81.3	441	379	43.7	276	35.2
1928	2788	730	1197	16.7	86.6	466	882	14.1	50.5	36.8
10.6	45.7	136	213	10.3	237	1155	1165	43.3	267	58.3
271	426	108	262	56.2	122	679	102	23.3	124	50.9
461	661	528	1395	59.4	32.2	130	385	66.7	379	142
4.74	4.29	29.7	168	49.1	67.9	403	375	13.1	34.6	68.5
78.4	193	95.6	153	17.6	112	385	1165	13.8	55.7	64.9
308	478	231	400	6.67	157	866	799	15.5	75	45.7
337	500	250	400	4.57	41.4	235	509	49.1	271	41
422	615	106	175	17.6	33.1	97.3	392	25	124	34.9
449	632	167	359	6.79	44.1	193	470	18.4	97.3	53.3
33.4	27.6	179	294	20.9	73.7	470	505	114	679	50.5
87.4	94.7	453	730	17	123	673	552	28.6	150	52.3
164	241	267	426	12.7	44.9	246	407	67.3	392	27.9
77	114	72.3	111	11.1	255	1346	407	12.9	40.7	41
98.2	168	313	478	8.98	39.6	221	269	62.6	379	54.7
32.5	37.2	500	866	13.2	53.3	279	418	37.5	248	31.9
835	1219	3.11	1.86	17.6	51.4	281	457	44.1	239	1.13
103	186	239	372	10.8	227	1286	453	90.6	626	153
117	157	231	403	34.6	29.7	193	757	63.8	340	54.7
1009	1540	163	308	29.2	13	55.7	583	47.8	248	51.9
777	1241	40	51.9	16	71.7	449	403	28.9	165	27.4
410	704	151	259	19.1	94.7	528	552	13.5	71.7	58.3
1208	1685	626	1084	36.8	40.7	227	866	25.7	189	32.2
160	223	264	396	15.1	31.6	112	704	10.6	40	31.6
292	422	153	284	7.57	11.9	53.8	418	14.3	73	41.8
235	362	160	757	89	1.84	16	11.2	40.3	235	51.9
188	255	441	791	43.3	41	163	973	86.6	594	46.1
906	1433	183	331	14.6	91.4	487	509	16.3	84.3	49.1
25.5	24.8	235	368	37.2	155	858	155	4	33.1	28.1
229	325	262	457	15.7	25.3	74.3	334	15.8	46.1	75
385	610	209	355	46.1	73.7	441	445	16.8	80.6	34.3
835	1208	75.7	118	2.94	271	1625	403	40.3	221	38.2
92.2	158	76.4	135	14.2	368	2091	429	11.2	43.7	25.5
276	396	160	279	12.5	26.2	133	784	18.8	82.8	40.7
9.39	12	142	217	19.6	59.9	292	1208	96.5	588	100
146	191	98.2	160	54.2	14.3	44.9	621	38.9	179	125
791	1155	95.6	172	8.43	50	271	407	31.9	172	35.2
1928	2690	1275	2035	66.1	12.5	42.9	626	89	578	21.5
311	441	23.7	163	28.1	75	372	1241	45.7	250	120
289	422	209	337	49.1	107	578	403	49.1	337	58.8
33.4	48.7	470	890	20.9	85.1	426	281	45.7	292	66.7
528	882	126	202	6.61	65.5	379	441	37.5	186	47
255	365	973	1582	56.2	34	157	349	40.3	241	20.4
59.9	73.7	71.7	121	23.5	41.4	217	379	11.9	44.1	44.1
178	308	470	1420	22.1	157	922	519	23.3	143	56.2
1310	1894	229	396	19.1	24.8	104	514	32.5	176	35.5
50.9	103	112	235	15.1	49.1	284	466	21.9	100	41.4
1370	1928	93.9	172	11.9	58.8	322	692	17.3	135	24.1
375	588	71.7	105	12.5	31.1	189	449	13.9	31.9	30.5
147	219	68.5	101	16.5	12.9	42.9	262	39.2	215	63.8
153	237	106	328	30.8	179	1075	547	50.5	289	15.5
209	292	257	429	42.2	52.3	237	403	26.4	183	37.5
279	414	328	528	26.7	32.8	179	414	31.1	104	202
982	1433	150	250	2.59	698	3652	1499	48.7	279	102
750	1155	81.3	143	19.6	189	1065	710	2.11	29.4	2.46
519	806	178	334	8.35	1	4.41	6.85	13.1	39.6	21.9
170	286	147	264	19.3	57.3	331	470	43.7	267	34.3
244	359	235	487	34	13	46.6	418	21.5	114	35.2
594	947	410	743	36.5	34.9	163	567	71.7	466	84.3
50.9	61	22.3	64.4	11	75	379	1114	31.9	211	31.1
90.6	122	172	294	18.1	286	1554	523	31.9	165	49.1
368	547	207	281	7.5	114	638	68.5	16.3	50.9	34.6
710	1027	205	362	31.9	87.4	578	137	21.7	122	21.7
89	131	1263	1877	31.6	77.7	403	542	38.9	217	34
523	813	991	1670	32.8	30.5	114	542	70.4	474	35.9
211	311	764	1286	18.6	45.7	233	813	28.6	124	37.2
441	710	538	1155	89.8	125	445	1946	16.1	87.4	44.1
56.2	100	102	170	27.4	158	922	547	28.6	189	57.8
213	340	372	599	6.21	100	533	337	29.7	160	39.6
331	429	165	289	11.9	25	165	505	37.5	205	132
262	355	389	655	72.3	57.3	311	445	26.2	146	15.8
76.4	79.9	54.7	229	33.7	59.4	375	542	57.3	362	22.9
1499	2091	685	1134	20.2	38.9	207	483	19.5	106	48.7
50	56.7	56.2	92.2	15.7	93.9	533	483	16.8	95.6	25.3
225	313	106	172	6.98	100	294	667	14.3	47.4	49.1
225	359	111	143	20.7	26.2	121	437	15.5	77	63.2
94.7	167	271	433	23.3	126	717	717	24.1	186	33.4
189	346	33.7	246	12.4	73.7	407	621	27.4	146	31.6
