# Supplementary material
Source: ML conference proceedings conference paper supplement (https://openreview.net/forum?id=nrbR2F29vU)
Supplement: supplementary_material [file 12. cd3cd28icam2+psit.xls]

## Sheet: Sheet1
praf	pmek	plcg	PIP2	PIP3	p44/42	pakts473	PKA	PKC	P38	pjnk
4.03	7.84	5	79.1	6.73	11.7	30.8	487	55.2	67.3	10
69.8	56.2	22.9	292	32.5	10.6	29.4	385	26.4	43.3	65.5
32.2	23.3	13.8	32.2	18.3	7.1	30.2	777	26.7	43.7	47.8
35.5	33.7	9.65	6.32	1.64	40.7	131	1963	17.6	33.7	61.5
36.2	30	10.4	44.1	7.37	17.3	55.2	922	16.5	44.9	55.2
33.1	24.4	3.96	75	14.5	25.3	85.1	1176	15.7	32.2	36.5
28.6	28.6	15.3	221	38.2	32.8	87.4	1827	2.27	1.51	18.3
42.2	34	3.13	5.42	2.15	41.4	138	3429	2.09	25.7	34.6
25.3	8.06	2.79	82	26.2	12	25	368	35.9	112	191
31.6	26.7	26.9	53.8	8.35	9.22	22.5	583	14.5	46.1	69.8
58.3	47.8	5.19	154	17.9	7.04	32.8	573	10.6	40.3	39.6
54.7	47	9.91	22.5	4.1	10.3	16.3	313	19.3	47.8	56.2
20	18.8	48.3	42.9	9.82	25.7	93.1	594	7.3	21.9	34.3
36.8	19.1	1.96	85.8	6.21	27.6	88.2	1322	15.3	51.4	44.9
89	61	6.73	17.3	13.2	10.8	20.5	483	16.5	27.6	40.7
133	103	8.35	9.14	1.51	10.2	17.8	649	14.5	17.6	14.7
44.1	37.9	1.75	107	12.4	10.3	22.9	567	10.6	30	51.4
38.2	22.1	6.67	21.3	5.47	9.47	25.5	533	20.4	33.1	10.8
46.1	16.1	2.59	102	21.1	40.3	137	2308	34.6	98.2	100
35.2	22.7	4.03	13	16	41	56.7	851	40	81.3	124
109	97.3	7.64	143	9.39	59.4	223	3398	2.86	54.2	4.87
93.9	55.2	1.53	121	5.57	54.2	158	2227	9.31	23.1	16.5
31.3	32.5	5.52	87.4	9.22	50.5	189	1310	7.99	20.9	26.9
6.38	5.67	15.4	179	30.5	21.9	43.7	813	25.3	46.1	32.8
84.3	71.7	5.28	14.5	11.4	38.2	129	1999	11.7	28.9	32.5
47.8	19.6	2.23	53.8	10.6	22.3	42.9	730	17.2	51.4	81.3
87.4	69.2	17.2	130	11.8	47.4	131	1981	23.1	47	22.5
30.8	31.9	16.4	13.7	5.28	9.91	31.3	655	1	4.37	5.52
37.2	29.2	17	40.7	17.9	33.7	145	2839	8.06	15	32.2
76.4	79.1	2.17	131	12.5	21.3	44.9	500	4.53	20.7	37.9
41	27.9	4.96	186	27.9	22.1	71	1027	36.8	73	79.9
20.7	18.8	9.73	359	22.7	73	255	2890	9.73	20.4	25.5
39.2	31.1	26.9	286	46.1	19.6	36.2	407	15.8	48.7	44.5
163	196	6.15	7.23	9.06	9.31	42.2	750	14.2	36.8	47.4
37.5	26.9	1.25	118	11.1	8.2	29.4	389	15.8	27.6	41
62.6	41.8	11.8	50.9	4.96	30	50.9	626	6.49	20.9	50
23.5	25.5	27.9	262	55.2	11.1	30.2	1275	16.1	40.3	38.2
146	118	11.2	16.8	4.29	18.4	75.7	1946	17.2	41.8	50.9
35.9	39.6	14.1	33.4	12.9	21.9	61	914	3.13	30.2	50.5
57.8	51.4	20.2	32.8	6.79	33.7	93.9	2969	15	27.1	46.1
63.8	53.3	7.99	43.3	8.28	10	25	487	7.37	83.5	15
5.42	6.38	15.3	17.3	6.61	13.1	46.1	523	49.1	132	184
60.4	70.4	10.4	229	36.5	46.6	215	3587	10.6	40.3	46.6
38.5	20.5	7.64	66.7	17.8	20.4	53.3	437	21.5	34	46.1
79.9	52.8	9.56	319	51.9	17	33.7	673	5.67	37.9	37.5
14.6	11.8	2.5	16.1	14.2	70.4	200	2393	12.2	47.4	30.5
39.2	25	5.14	262	37.5	12.6	31.1	396	14.6	15.5	51.9
135	135	6.49	89.8	10.8	41.8	64.9	461	18.4	49.1	58.8
36.8	26.2	9.91	153	18.1	43.7	102	1358	17.6	37.9	52.8
64.9	46.6	4.61	78.4	10.3	12.2	25	750	6.49	14.9	8.98
44.5	34.9	24.4	158	9.31	6.61	9.39	132	9.65	20.5	35.2
200	202	9.73	37.5	11.5	3.28	7.1	142	14.3	39.6	60.4
29.2	18.6	3.34	4.78	4.66	4.7	14.3	241	1	1.24	2.11
67.3	40	6.85	22.5	6.61	5.57	14.5	491	11.1	38.2	34
25.5	23.5	13	157	19.6	5.23	15	437	24.8	47.8	42.9
62.1	34.9	6.79	12	6.04	8.82	58.3	276	7.91	2.59	1.72
56.7	66.7	2.44	3.52	3.43	34	94.7	1963	98.2	127	24.1
65.5	61	1.5	202	5.94	20.2	29.7	667	36.2	96.5	112
41	21.7	27.6	22.5	7.1	33.1	83.5	1794	14.5	18.1	28.9
71	35.5	9.56	193	15.4	22.9	76.4	2207	41.4	102	158
38.9	21.1	42.9	225	29.2	9.47	32.2	147	6.38	25.7	7.64
72.3	45.3	6.49	9.65	3.82	17.8	40	644	8.13	21.5	35.2
65.5	44.5	10.8	19.3	8.35	32.2	112	1582	39.6	83.5	81.3
58.8	42.2	6.26	10.6	1	39.6	139	1144	1.95	5.09	6.26
47.4	42.6	1.81	118	12.1	11.1	44.9	890	13	43.7	30.5
64.9	14.1	20.4	322	52.3	9.65	34.6	843	62.1	91.4	12.2
22.9	15.5	5.73	10	12.9	5.19	12.4	300	18.8	48.3	31.6
47.4	31.3	26.9	54.2	20.7	24.1	48.7	673	25.5	50	47.4
47	31.3	34.6	269	50.9	21.9	59.9	750	30.8	60.4	87.4
38.9	24.4	5.05	19.8	9.22	10.9	32.8	610	6.73	14.3	24.8
34.6	20	5.19	81.3	7.64	17.3	43.3	914	24.1	61.5	50.9
113	85.1	7.5	9.39	7.23	17.5	31.3	542	19.8	31.6	34.6
150	121	2.11	161	12.6	11.9	36.8	385	6.85	20.2	4.78
27.6	25.9	22.9	29.2	9.73	9.22	25.7	281	21.7	50.9	67.9
35.5	27.9	5.23	83.5	17.2	45.7	179	3460	1.65	6.15	1
30.5	61	6.1	17.3	1	15.4	39.2	414	64.9	142	111
53.3	10.2	8.28	15.3	6.85	23.5	31.6	523	23.7	56.7	77.7
52.8	43.3	16.7	141	15.1	11.7	23.1	610	20.4	35.2	25.9
142	76.4	7.57	62.6	14.2	13.7	25.9	453	14.1	35.2	24.4
99.1	77	3.46	151	7.43	5.83	29.7	487	12.4	26.9	25.9
18.1	15.7	81.3	92.2	11.1	8.9	23.9	519	21.5	45.3	22.1
40.3	26.9	3.52	29.4	1.96	10.8	24.8	547	17.5	37.5	32.5
34.6	35.5	10.3	9.14	3.96	10.9	29.2	685	22.1	48.3	53.8
25.7	30.2	6.49	76.4	3.72	52.8	72.3	547	20.2	44.5	40.7
36.8	22.9	7.5	15	13.2	22.3	101	1446	42.6	63.2	69.2
15.1	3.72	35.2	255	41	38.9	62.6	743	15	32.5	30.2
67.3	55.2	28.6	294	53.3	34.6	76.4	1655	43.7	98.2	105
31.9	31.9	5.67	88.2	27.9	31.6	102	947	14.1	26.4	19.6
32.2	30	4.96	98.2	13.9	12.9	28.1	478	12.6	50.5	44.9
80.6	58.8	3.31	112	11.9	62.6	135	1568	11.3	49.1	31.1
42.6	28.6	8.58	12.4	2.27	19.1	39.6	441	10	48.3	36.2
69.2	53.8	1	85.1	9.91	21.1	37.2	400	32.8	79.1	62.1
79.9	71.7	2.69	66.1	15	19.8	62.1	557	7.91	28.4	30.5
141	117	1.61	145	10.6	13.5	52.3	615	15.8	38.2	36.5
127	101	8.82	13.7	2.44	13.2	26.4	491	28.6	48.3	1
48.3	37.5	11.7	106	9.31	18.3	40	1486	45.3	88.2	131
135	120	6.85	12.5	8.06	19.1	42.2	673	22.9	21.9	7.5
202	136	4.7	138	5.57	10.8	32.8	433	2.35	9.22	14.9
209	179	5.62	21.3	1.01	7.04	24.4	655	19.6	48.7	52.3
44.1	21.7	43.7	108	35.5	6.98	27.9	491	25	54.2	39.2
38.9	24.1	12.4	25.5	6.21	16.7	52.3	1286	16.7	41.8	29.4
99.1	118	6.15	39.6	13.6	7.7	21.5	58.3	20.9	49.1	34.9
38.2	15.1	2.55	13	6.55	13.2	27.4	400	23.7	43.7	64.4
46.6	34.6	4.18	10.7	2.02	46.1	135	2308	12.6	30	18.9
334	305	9.14	9.14	1.47	8.13	23.1	813	1.64	93.9	4.18
146	133	12.4	331	33.4	14.1	28.6	407	77.7	164	142
59.4	58.8	7.99	141	31.6	18.8	37.2	269	16.1	41.4	39.6
191	160	4.61	30.5	8.13	43.3	104	1843	17.9	25	32.8
38.2	37.2	7.1	9.73	8.9	33.7	82	956	10	29.4	3.43
147	111	9.39	131	10.6	36.8	96.5	1446	22.3	76.4	75
195	133	46.1	286	75	8.9	27.6	474	26.2	53.3	71.7
68.5	51.4	6.92	12.3	4.53	29.4	57.8	505	15.7	58.8	42.6
101	86.6	3.31	48.3	12.7	14.1	41.4	632	46.1	124	124
133	111	13.1	115	23.9	61.5	147	947	26.4	71	92.2
78.4	93.1	6.32	7.37	10.6	26.9	104	170	16.7	31.3	33.7
96.5	96.5	7.04	64.4	16.8	10.8	44.1	375	12.9	40.3	48.7
20.9	22.3	5.94	62.1	6.61	33.4	110	3685	22.5	43.7	32.8
110	53.3	1	44.9	4	6.44	26.7	661	48.3	64.4	34.6
188	126	5.14	44.1	7.1	13.8	53.3	533	13.1	28.4	22.5
191	127	1	98.2	9.65	20	49.6	519	7.04	19.3	12.7
50	28.4	9.73	72.3	8.74	10.3	35.9	750	8.58	16.7	38.5
29.2	23.9	36.8	198	41.4	41	105	1486	31.9	71	53.8
63.8	44.9	31.6	25.3	8.66	10.6	40	610	32.2	88.2	71.7
147	146	16.3	21.5	6.49	12.5	35.5	255	26.9	56.7	60.4
41.8	30.8	7.77	14.1	6.73	17.2	45.3	379	15	31.1	29.2
34.6	27.1	6.49	153	27.6	22.5	66.7	2350	18.4	46.6	34
78.4	50.5	6.1	14.5	21.9	21.5	75.7	1596	17.5	19.3	28.1
165	110	26.7	17.6	10.9	20.4	44.1	567	7.77	16.4	14.5
58.8	37.5	3.49	118	16.7	32.8	91.4	2436	4.07	35.9	18.9
135	92.2	1.43	229	31.3	17.5	37.9	286	11.7	30	16.4
31.9	25	1.91	151	16.8	8.98	17.2	429	13	34.9	40.7
38.9	22.7	6.61	178	6.21	25.7	56.7	621	6.61	32.2	13
34.9	34.9	6.1	16.3	5.83	15.5	32.5	478	23.7	43.7	43.7
83.5	64.9	5.94	80.6	13.8	16.1	36.5	453	13.2	18.8	4.29
40.7	25.7	13	30	4.78	38.5	92.2	1446	15	32.5	34.3
44.1	30.2	57.8	429	83.5	17.8	76.4	1310	14.9	41.8	79.9
74.3	71.7	17.2	21.1	16.1	11.7	18.8	461	20.9	44.1	53.8
49.1	28.6	5.73	11.7	2.5	19.5	80.6	799	22.1	52.3	7.1
239	196	1.78	109	13.8	29.7	88.2	1640	8.13	10	9.22
59.9	46.6	34.6	36.5	6.85	9.14	46.1	858	42.2	106	122
40.7	37.5	7.17	74.3	7.1	21.1	77.7	1999	7.1	22.9	27.1
34.6	17.8	6.21	74.3	2.97	46.1	89.8	1322	4.78	52.3	2.29
40.7	27.4	30.2	45.3	24.1	55.7	132	1860	10.9	35.5	24.1
103	75.7	31.9	259	45.3	50.5	129	1625	14.6	34.3	20.7
149	138	4.33	11	1.14	59.9	202	2308	15.1	30.8	57.3
8.13	13.9	19.8	19.8	21.7	5.94	14.1	429	2.84	25.9	30.2
35.2	22.7	10.4	11.1	5.83	21.3	69.8	1540	15.5	38.5	49.6
36.5	33.7	3	121	8.82	41.8	136	1946	17	47.4	44.5
35.5	20.9	4.83	52.8	8.51	41.4	127	2167	20.9	34.3	35.9
55.2	50.9	6.38	15.8	4.29	35.5	94.7	1946	15.8	44.9	34.9
34.9	25.7	1.36	81.3	9.14	10	34.6	914	37.9	90.6	88.2
63.2	48.3	26.4	36.2	7.64	49.6	145	1963	16.7	30.5	46.6
48.3	37.2	17.9	21.3	1.68	13.1	30.8	359	12.7	30.5	25.5
36.8	27.6	1.79	117	8.82	14.9	81.3	914	15.1	34	31.3
142	135	7.1	165	6.49	33.7	82.8	1124	6.1	31.6	3.62
23.9	12.9	10.1	32.8	11.1	18.9	51.4	594	14.1	34.3	35.5
41.4	22.7	10.8	281	27.1	23.7	75.7	1670	33.4	71	79.1
75.7	17.8	7.57	16	8.74	3.82	7.84	123	51.9	107	101
27.9	27.4	16.7	28.6	14.6	12.5	22.1	255	132	297	328
157	103	37.9	41	22.5	16.5	42.6	552	42.9	83.5	92.2
34.3	25	27.6	289	45.7	19.6	45.3	478	1.15	40	7.77
86.6	65.5	8.98	54.7	9.91	49.6	163	1928	13.1	38.5	42.2
34.6	31.6	15.7	259	21.1	27.4	55.7	673	16	41.4	35.5
21.3	18.1	9.39	213	24.1	13.6	31.9	433	16.3	50.9	35.9
38.2	28.4	3.25	213	11.7	12	29.7	1018	17.2	51.4	36.2
34	19.6	7.77	10.6	3.79	18.3	52.8	1499	57.3	143	136
121	93.9	1	164	19.5	16.7	49.1	552	14.3	46.6	15
35.5	7.23	4.83	111	11.3	5.78	21.9	449	16.7	47	42.2
38.2	30.8	5.73	259	15.7	24.6	66.7	1346	12.9	31.3	43.3
109	103	3.55	61.5	15	19.8	64.9	1946	10.6	22.7	24.1
124	109	4.87	9.91	14.6	9.82	32.5	1104	22.7	46.6	45.7
39.2	24.6	6.98	229	32.2	32.2	95.6	1346	20.7	74.3	52.8
32.5	33.7	27.9	233	58.8	23.1	57.8	764	90.6	213	255
34.9	30.5	16.5	40.3	30.5	9.73	28.9	523	15.8	61	61.5
64.4	53.8	10.7	6.85	4.07	28.1	42.2	784	20.9	26.7	9.73
66.7	50.9	1.18	191	14.5	14.7	27.9	547	1	7.64	11.1
3.62	4.7	1	195	27.9	16.3	43.7	743	14.6	30.2	24.1
61	34.9	18.1	470	43.7	53.8	239	2864	13.8	30.2	5.05
36.5	27.6	5.19	241	31.1	29.4	85.8	2864	19.8	60.4	48.3
37.5	34.9	9.06	9.06	12	20	36.8	604	15.3	30.2	36.2
36.8	26.7	5.99	10.9	2.21	12.4	35.9	965	13	42.9	34.9
46.1	33.1	1.14	111	6.32	14.7	37.2	562	17.6	34.6	41.4
42.2	32.5	11	255	52.8	16.1	57.3	1000	10.6	30	36.5
105	129	1.49	328	29.4	18.3	37.9	835	8.9	32.8	41.4
31.6	19.8	4.26	38.5	5.42	15	34.6	509	16	40	52.8
54.2	38.2	8.43	44.9	8.06	6.38	14.2	422	21.9	33.4	53.3
39.2	19.6	13.3	15.8	8.13	6.61	26.2	418	16.7	35.9	26.4
92.2	102	13	181	20.4	18.6	32.8	403	15.4	22.3	17.9
33.7	28.1	3.52	121	13	31.9	97.3	1407	18.8	50.9	43.3
58.8	32.8	4.87	133	5.57	24.6	59.4	1472	9.56	13.9	6.26
183	130	5.62	107	23.7	13.9	49.1	947	23.7	41.4	35.9
96.5	73.7	1	145	16.4	52.3	97.3	973	21.1	50	32.5
48.3	21.9	3.4	109	10.1	16.1	45.7	375	14.1	35.2	37.2
29.7	29.2	18.3	337	45.7	14.2	55.7	1685	18.8	30.2	44.5
27.6	24.1	27.6	34.3	9.65	10.3	24.1	349	16.7	38.9	24.6
33.7	35.9	21.3	204	34.6	18.9	43.7	1241	16.4	45.3	36.2
40.7	31.1	4	93.9	7.17	14.6	21.1	453	9.06	38.5	34.6
106	91.4	8.58	16.1	11.4	8.9	36.5	685	22.1	36.8	40.7
37.5	35.2	1.68	191	6.79	18.6	46.1	567	15.8	42.9	40.7
23.5	24.1	16.3	28.6	11.7	47.4	141	3078	20.7	44.9	31.9
48.7	30.5	7.04	27.1	8.35	51.9	104	835	2.79	75	5.28
103	71	4	16.1	1.26	26.9	66.1	496	10.6	40.3	31.9
61	46.6	4.87	24.8	12.9	34.6	102	1963	12.4	25	42.9
30.8	20.7	3.19	87.4	6.85	24.4	60.4	750	17.6	46.6	29.4
138	87.4	9.91	29.7	8.66	27.9	100	1275	18.1	47	26.4
37.2	25.9	7.7	7.57	10.2	13.6	43.7	528	15.1	34	39.2
49.1	42.6	2.84	32.8	1.88	7.84	36.8	583	15.5	38.9	38.5
57.8	45.7	38.2	286	50.5	4.53	15.3	396	25.3	56.2	57.8
37.2	25.3	21.7	19.8	13.3	14.9	46.6	679	17.3	32.5	33.4
40.7	39.2	8.43	16.3	9.06	11	50	302	16.7	56.2	72.3
44.5	34.3	22.5	36.5	17.6	6.38	21.9	120	31.9	61	74.3
93.9	109	10.6	20.5	17.2	8.13	27.1	843	13.6	42.2	28.4
46.6	27.1	8.98	33.1	1.83	34	155	2308	11.5	29.2	31.9
42.6	34.3	2.67	98.2	5.52	12.9	31.3	300	20.5	36.8	48.7
22.1	25	8.74	21.9	1.45	5.67	25	509	28.4	49.6	49.6
30	17.9	7.1	7.99	3.89	17.5	33.7	965	12.5	122	6.1
75.7	55.7	8.35	11.9	3.11	23.1	50.9	519	16.5	50	31.1
92.2	61	10.6	250	35.9	11.1	21.5	279	21.5	55.7	58.3
108	90.6	7.43	15.1	7.1	23.7	53.3	1009	15.3	44.5	49.1
36.5	27.4	18.4	50.5	11.4	14.1	37.9	757	81.3	183	217
76.4	73.7	4.91	30	7.91	25	50.9	313	14.3	35.9	27.6
129	93.1	7.57	18.6	1.86	57.8	145	1433	22.1	37.9	31.6
11.9	11.9	6.92	6.67	2.27	12.5	45.7	1176	107	145	33.7
88.2	64.9	32.5	50.5	8.43	12.1	25.5	385	24.8	56.2	3.46
38.2	40.7	5.67	79.9	13.1	16	32.2	422	63.8	151	127
36.2	33.7	4.49	158	15.7	10.3	32.8	429	21.3	38.9	29.7
38.5	30.5	4.83	142	11.2	9.73	34.6	422	22.9	58.3	49.1
119	118	17.9	58.3	10.4	17.8	28.4	461	14.7	27.1	34.3
101	76.4	4.41	37.5	16.5	8.43	25.3	445	2.17	34.9	12.7
34.3	24.6	23.3	26.9	2.41	37.9	94.7	1433	12.5	30.5	25.7
43.3	27.6	18.3	24.1	3.28	14.1	43.3	449	41	71	57.3
37.5	22.5	7.43	50.5	9.22	21.9	49.6	1065	73.7	153	135
35.9	30.5	13.3	30.5	16.8	9.56	13.3	289	10.3	29.4	36.5
25.7	19.8	7.77	8.51	12.9	6.98	24.6	433	12	31.1	24.1
36.8	18.4	8.43	241	44.5	34	98.2	1981	34.9	102	85.1
37.2	23.7	20	15.7	11.8	12.3	36.5	500	56.2	141	168
41.4	34.9	2.94	43.3	11.7	16.8	41.4	311	15.4	31.6	5.94
35.2	20.4	4.91	297	28.9	35.9	119	1794	31.9	75.7	57.3
42.6	32.2	3.22	93.1	5.99	23.1	42.9	509	15	32.8	22.1
36.8	43.3	13.3	141	27.9	29.7	36.8	340	16.4	31.9	34
40	28.6	98.2	349	85.8	14.9	44.9	685	52.8	99.1	94.7
31.6	25.3	1.49	188	8.35	7.99	7.5	129	15.3	32.2	35.5
44.5	25.7	7.91	229	42.2	28.6	71.7	355	31.9	52.3	56.7
44.1	40.7	8.2	328	50.5	15.4	26.9	426	12.1	39.6	32.5
50	46.1	9.39	9.56	7.77	8.74	28.4	418	15.5	33.7	24.6
72.3	40.3	4.33	80.6	6.73	48.7	191	2969	11.1	29.7	37.5
34.9	39.2	7.99	8.74	3.59	17.3	51.4	898	19.8	49.1	40
86.6	75	1.89	95.6	10.5	14.9	49.1	346	31.1	59.4	62.1
45.7	25.3	15.7	237	52.8	22.7	68.5	470	16.8	35.5	31.3
41.8	18.4	11.4	207	34	11	30.8	552	20	49.1	28.6
142	87.4	9.14	76.4	8.2	11	34.9	770	23.9	41.8	44.9
84.3	98.2	5.47	132	4.96	20.7	64.9	509	12.3	22.9	1.98
30.2	17.9	7.17	12.6	9.47	19.8	54.2	1625	17.3	50.5	34.9
40	33.4	2.25	98.2	15.7	7.91	22.1	717	14.3	40.3	42.9
76.4	52.3	48.7	68.5	13.1	26.2	87.4	661	21.7	38.2	19.6
26.7	24.6	1.21	183	10.6	7.3	10.2	213	7.84	28.4	29.7
22.9	17.3	9.06	27.4	10.6	29.4	85.1	1382	16.4	31.1	33.4
42.6	31.9	8.06	11.4	5.94	11.8	35.5	542	14.6	35.2	34.6
34.9	34.3	55.7	163	34.3	33.1	87.4	1395	14.6	37.5	21.5
35.9	27.1	47.4	57.3	19.3	19.5	74.3	1459	22.9	36.8	34.3
22.9	3.46	2.17	297	30	9.56	12.4	316	14.6	28.1	12.9
40.3	37.5	6.98	51.4	8.43	28.4	96.5	717	16.5	37.5	48.7
55.2	34.6	7.84	15	8.66	11.2	50.5	1230	15.7	40.7	10.5
109	84.3	6.85	133	35.5	14.5	35.2	505	15.4	42.6	31.6
127	87.4	7.23	13.8	14.5	14.5	40.7	528	16.7	32.8	30.8
42.2	28.4	2.35	73	11	13.8	35.9	466	13.9	45.7	40.3
43.3	22.9	1	143	14.2	30	108	1499	17.2	36.5	17.5
66.7	57.8	41	37.9	10.2	9.65	28.1	685	22.7	36.5	47.8
27.4	2.5	11.1	186	30	22.1	36.2	533	14.5	29.4	24.8
34	23.9	4.29	106	14.9	9.65	42.9	777	10.3	27.4	40.3
34	21.7	10.6	8.82	5.14	57.3	195	2525	1.36	1.79	6.85
52.8	45.3	11	186	14.5	41.8	184	2187	17.9	38.5	31.9
38.2	36.8	8.51	41.8	3.89	13.7	42.9	604	17.8	29.7	41.8
54.7	37.9	1	129	10.1	18.9	71	466	16.7	24.6	10.5
43.7	36.2	7.64	34.3	7.1	49.1	189	4451	13.3	35.2	44.1
73	71.7	8.66	47.4	13.6	10	26.2	445	39.2	93.1	95.6
35.5	26.9	1.09	111	1.24	12.9	34.6	478	17.8	32.2	44.5
27.9	30	2.04	155	14.9	17.2	37.5	289	17.2	26.2	35.9
24.4	10.9	30.8	141	26.7	44.1	95.6	509	16.3	38.2	27.9
41.4	32.5	4.61	88.2	10.6	20.7	42.2	557	16.3	21.5	27.9
26.7	17.8	12.1	308	59.9	9.14	44.5	538	11.3	34.3	28.4
24.8	17.9	1.78	155	20.2	16.3	38.2	478	15.8	42.6	30
28.6	17.8	5.88	57.3	15.3	15.1	39.2	573	16.3	47.8	25.9
53.3	36.5	5.57	9.14	9.65	23.7	45.3	533	9.06	39.2	3.16
114	95.6	1	151	19.8	14.5	38.5	407	45.3	100	117
44.1	28.4	12.5	107	38.2	14.9	40.3	552	17.2	41.4	54.7
34.3	29.2	8.74	11.5	9.39	13.2	59.4	410	15.8	50	54.2
26.2	18.6	1.17	133	25.5	24.8	75.7	649	71.7	161	137
28.9	37.2	4.91	50	10.6	19.3	62.1	523	19.1	40.3	41.4
30.5	26.9	4.14	106	11.5	17	45.7	316	21.1	44.9	41
154	120	8.9	13.3	4.66	7.77	23.3	382	12.1	40.3	23.5
31.9	32.2	6.1	81.3	12	23.5	47.8	1124	81.3	229	248
44.5	30.2	13.8	233	14.7	14.9	47.4	433	8.06	59.9	6.26
23.3	11.3	1	173	5.83	6.38	28.6	368	15.1	31.6	14.1
34.3	27.4	10.9	13.3	5.33	7.5	30.8	573	16.5	26.7	26.2
14.3	9.82	9.91	20.4	9.39	6.44	10	557	8.58	19.8	3.25
31.1	17.8	21.9	20.2	19.1	17.6	52.8	457	9.06	20.5	6.73
36.5	29.4	8.51	12.1	7.5	7.99	13.8	365	6.32	20.4	6.15
40.7	23.5	3.34	308	22.1	14.9	37.2	583	11.2	38.5	49.1
70.4	38.9	30.8	184	34.3	24.8	56.7	414	12.4	40.7	53.3
32.5	22.9	13.2	111	21.1	8.51	30.5	562	13.8	31.1	5.83
63.2	31.9	13.5	12.2	11.1	43.7	107	1114	23.7	49.6	44.9
85.1	57.8	1	184	15.4	44.9	93.9	799	44.9	95.6	102
29.2	27.1	1.54	15.8	8.58	12.3	40.3	433	12.7	33.1	34.9
30	18.4	5.57	93.9	2.97	8.2	63.8	138	31.6	56.2	49.1
28.9	27.1	7.99	340	47.4	48.7	165	1540	18.3	40.3	35.9
56.7	44.1	11	23.3	24.6	46.6	93.1	1625	2.89	10	6.1
35.5	20.9	17.3	17.9	13.3	51.4	110	1219	36.5	72.3	74.3
59.4	48.7	5.88	86.6	14.6	11.3	31.6	196	13.1	27.4	27.4
58.8	51.9	7.7	97.3	11.4	19.1	50	533	14.1	32.8	26.2
53.8	34.9	9.73	6.32	2.27	23.3	57.8	599	12.5	32.5	24.4
73	54.7	6.98	74.3	9.65	60.4	244	2996	25.3	56.2	58.3
59.9	14.1	1.57	92.2	4.66	10.3	34.6	281	47.4	75.7	8.13
39.2	30	7.64	22.5	18.3	15.3	44.9	533	10.6	34.9	35.9
36.2	23.1	13.2	12.5	13.2	27.6	55.7	457	27.9	51.4	48.3
98.2	70.4	13.7	25.5	6.85	10.9	54.2	610	11.5	40.3	39.6
41	28.4	13.5	264	37.9	13.3	29.7	319	22.5	32.2	18.1
40.7	33.1	23.7	141	28.1	66.7	153	1144	14.6	34.3	29.2
37.5	37.2	2.69	63.8	5.73	34.6	121	2548	11.5	16.5	20.9
56.7	77	31.1	33.1	11.2	57.3	151	1486	25.3	44.5	50.9
35.5	25.7	7.99	12.9	8.13	7.23	23.1	355	20	30.2	36.2
34.9	34.3	25.5	37.5	12.6	7.64	32.5	644	48.3	87.4	61
40.3	19.8	6.85	300	43.7	12.7	29.2	281	99.1	289	281
43.7	20.5	17.3	365	57.3	9.06	30.8	441	21.7	34.9	16.8
24.6	19.6	15.5	365	48.7	34	61.5	457	21.3	30.8	32.2
32.2	23.3	11.4	176	20.2	13.6	34.3	806	12.7	27.1	9.06
39.6	34.9	2.19	382	20	7.1	23.7	457	12.3	32.2	23.7
70.4	61.5	10.6	22.5	8.43	25.9	69.2	710	22.1	71	71
32.8	18.4	13.5	123	12.3	8.66	26.4	311	13.5	37.5	35.5
71.7	49.1	68.5	389	78.4	4.1	19.3	107	55.2	157	136
58.3	51.4	4.91	41.4	8.58	10.8	34.9	352	17.2	37.5	30.8
33.4	22.3	6.73	63.2	7.91	32.2	89.8	1055	77.7	151	90.6
34	22.5	11.3	16.1	10.5	13.8	46.6	292	14.7	46.1	20
29.7	24.4	55.2	215	47	6.67	29.4	189	6.44	21.7	12
45.3	26.9	28.4	92.2	37.2	6.44	15.8	410	10.4	31.1	35.9
28.4	20	13	276	41.8	22.7	48.3	679	4.29	13.1	8.13
73	47.4	7.3	12.3	7.37	15.8	40.7	379	6.44	23.7	13.5
87.4	74.3	5.52	91.4	12.2	16.3	36.2	496	32.5	61	59.4
44.1	34.6	12.4	52.8	14.6	10.6	31.1	449	13.9	36.8	26.7
89	69.8	5.05	5.42	6.79	14.6	40.3	410	9.31	14.7	9.91
29.2	20.2	3.05	78.4	18.3	10.1	29.2	396	13.2	37.9	39.6
43.3	26.9	15.5	29.7	5.14	13	38.2	474	12.3	28.1	23.1
36.5	25	10.1	13.7	4.78	6.38	28.9	233	16.7	65.5	41.4
39.6	21.5	7.99	18.3	3.13	36.8	103	1395	8.74	29.4	34.3
38.2	26.7	4	101	5.99	23.7	55.7	523	21.5	42.9	73
24.4	27.1	4.53	133	12.5	16	77	757	15.3	35.5	24.6
84.3	55.7	5.88	55.2	11.3	32.8	58.8	487	21.9	37.5	35.9
59.9	57.3	6.21	13.9	16	17	46.6	764	25	46.6	38.2
37.5	25.5	14.6	66.1	15.1	10.2	32.5	449	8.35	16.3	1.72
27.9	23.9	5.78	92.2	12.6	9.22	20.5	441	13.3	34.6	24.4
38.2	23.1	13.8	302	38.2	19.8	32.2	433	18.4	48.3	50
132	79.1	1.51	95.6	16.8	22.7	44.1	588	16.1	29.7	38.5
75.7	58.3	11.2	14.1	10.1	9.14	49.1	843	8.06	28.1	34.9
36.8	22.7	10.5	4.1	9.31	8.13	23.5	221	21.9	58.8	73
10	12.7	7.57	17.3	9.47	10.6	55.2	1252	10.6	40	22.3
28.4	25.3	18.4	389	31.6	20	46.1	325	37.9	78.4	164
26.4	21.9	8.43	51.9	3.19	14.7	36.5	528	16.3	33.1	37.2
42.2	25	7.04	82.8	11.8	13.7	50	379	6.73	45.7	32.5
32.5	29.7	11.4	181	14.9	19.1	44.5	496	5.52	14.1	12.9
30.2	21.5	7.5	30.8	7.1	19.5	47	362	36.2	106	111
32.5	27.6	11.4	191	21.1	15.4	40.7	441	16.4	26.4	13.1
36.8	25	1	149	17	12.9	34.3	991	12.2	33.7	49.1
35.5	23.3	5.94	67.9	6.92	9.14	37.2	286	23.7	59.4	66.1
77.7	47	7.57	3.68	3.62	8.9	38.2	325	12.2	35.9	24.1
34	15	3.16	109	14.3	4.61	12.7	157	54.2	126	113
59.4	53.3	10.7	211	24.8	15.5	29.7	470	37.5	125	92.2
34	15.3	7.64	13	1.03	17.5	42.6	621	21.3	69.2	34.6
30	24.6	9.65	6.79	5.88	27.1	40	365	1.13	352	13.2
29.4	27.6	3.72	103	7.77	17.5	40.3	449	10	34.9	27.6
50	48.3	41	71	20.4	42.6	108	1009	16.3	43.3	29.2
31.3	19.3	8.9	5.42	1	23.7	49.1	441	15.1	36.2	23.9
40.3	21.5	9.91	368	35.5	27.4	92.2	2035	39.2	60.4	58.3
35.2	33.7	2.48	50	3.79	5.73	20.9	221	22.3	31.1	40
71	49.1	11.9	183	26.4	21.1	32.2	533	5	5.88	10.4
25.9	45.3	2.39	85.8	14.9	10.6	40	355	13.7	28.4	16.4
30.8	16.8	8.35	11.3	1.01	10.6	38.5	300	12.4	37.2	19.3
39.6	26.4	13.3	274	35.2	41	117	1009	10.7	30	31.6
47	31.6	7.43	19.5	3.79	23.7	50.5	567	11.1	39.2	31.9
31.6	23.7	4.7	111	8.06	16.4	43.3	626	13.9	44.1	38.2
34	29.4	36.8	63.2	15.7	15.8	30.2	547	14.2	34.6	43.3
32.8	20.2	9.31	28.9	5.28	9.56	28.1	573	64.4	176	150
36.5	25	26.9	271	52.8	18.3	45.3	632	64.4	207	153
45.7	30.2	22.9	276	46.6	25.9	50.5	437	8.66	29.4	36.2
127	91.4	2.23	133	13.8	13.6	64.9	1055	16.3	37.2	29.4
73.7	60.4	11.1	14.3	9.47	12.1	41.8	621	10.9	29.7	31.3
122	93.1	11.8	11.7	7.1	18.6	51.4	514	6.32	14.1	3.37
34.9	28.9	17.8	281	36.2	8.74	27.6	573	12.5	26.2	11.9
68.5	50.9	1.11	127	10.6	4.14	13.8	175	24.4	67.3	35.9
77	58.3	13.7	132	12.6	33.4	75.7	1094	15	30.8	27.4
41.8	33.4	5	43.7	11.2	12.2	39.2	422	9.31	32.8	29.7
46.6	34.6	6.32	63.8	17.2	15.7	40	403	14.1	18.1	32.2
97.3	79.9	15.1	21.7	12.1	13.8	32.2	274	1	20	3.65
99.1	73.7	7.17	244	44.1	12.5	35.2	478	43.7	94.7	85.1
21.9	22.9	6.98	69.2	3.43	14.5	44.5	500	10.7	37.2	35.2
22.1	24.6	21.1	167	32.2	5.62	13.7	181	18.8	37.9	23.7
21.1	59.9	2.23	120	8.06	6.73	17.3	24.1	12	23.9	27.4
38.9	24.4	9.47	110	17.9	23.9	74.3	1554	15.7	42.2	32.5
53.3	47	50.9	45.3	8.06	44.1	95.6	692	53.3	136	97.3
54.7	30.2	31.1	66.1	13.1	23.9	46.6	437	16	40	22.3
132	99.1	2.13	133	9.65	12.4	26.7	389	13.8	51.9	42.2
18.9	9.82	3.89	246	36.5	9.39	41.8	346	15.7	24.6	3.13
74.3	55.2	10.6	15.1	10.2	10.2	30.8	292	16.5	34.9	30.8
35.2	21.7	5.09	80.6	13.2	22.5	40	667	15.8	42.9	47.8
44.9	27.9	1.68	49.6	7.1	10.1	23.3	632	15.5	31.1	34.9
68.5	47	4.03	9.47	1	13.3	31.1	453	66.1	107	72.3
35.5	22.5	3.79	365	50.9	5.23	20.5	509	21.7	56.2	48.7
31.3	29.2	4.53	6.38	5.33	3.92	21.7	453	75	195	229
19.5	16.3	6.04	6.21	2.76	24.8	48.7	610	21.3	61.5	73
43.3	20.7	14.1	294	34.3	7.77	22.7	655	54.2	123	153
41.8	32.8	3.68	20.2	10.6	28.6	75.7	1459	10.4	13	12.2
38.9	27.6	4.1	244	24.8	14.9	37.5	433	13.1	30.2	30.5
142	118	9.14	2.27	5.28	14.1	37.2	433	15	23.1	16.5
58.3	44.9	5.57	46.1	12	44.1	103	1499	1	35.2	6.92
43.3	27.6	5.28	78.4	12.3	23.3	41.4	334	2.13	40.7	7.3
29.7	26.7	34.6	67.3	19.6	13.8	56.7	389	10.7	21.3	17.2
33.1	15.3	28.1	23.1	9.14	12	38.9	453	10	30.5	33.7
38.2	26.2	7.5	8.35	15.1	33.7	132	4068	12.5	37.9	37.5
33.1	9.31	5.67	11.1	4.26	24.1	55.7	567	20.9	54.7	25.7
31.9	23.1	11.2	178	32.8	34.9	97.3	1197	19.5	32.5	22.9
30	22.1	9.65	14.2	1.49	31.1	108	2227	10.8	37.5	34.6
16.7	2.97	22.5	67.3	10	10.7	32.8	583	13	36.2	19.5
26.4	15	5.57	11	1.29	24.1	68.5	982	4.83	76.4	7.99
39.6	25.3	20.9	29.7	4.66	41	107	1554	12.4	12.6	35.9
126	115	9.47	36.8	7.77	31.3	49.6	207	18.8	39.2	57.3
24.4	19.3	28.4	509	69.8	20.4	49.6	547	82.8	120	31.3
10.5	8.9	2.35	43.3	8.9	25.5	51.4	567	14.3	65.5	46.6
26.9	22.9	4.18	52.8	16.8	52.3	155	2503	12.4	33.7	31.1
39.2	30.5	9.22	325	41.8	28.4	41.4	538	66.1	107	11.2
36.5	39.6	31.3	34.6	16	17.5	49.6	346	7.84	63.8	7.99
42.2	23.3	17.8	20	6.21	15.7	83.5	445	53.8	146	170
79.1	87.4	1	158	13.6	36.5	168	1094	18.4	46.1	55.2
44.1	29.4	2.41	75.7	3.65	18.9	36.5	418	55.7	145	153
198	142	21.1	19.3	4.83	22.9	51.4	496	1.67	22.9	17
36.8	32.5	28.9	50.5	6.15	20.7	50.9	717	33.4	44.1	17.2
27.9	25.3	6.04	20.2	10.5	15.8	32.8	352	8.2	22.3	22.1
34.6	28.1	6.21	10.6	7.99	13.3	41.4	538	24.1	43.3	6.49
62.1	45.3	4.53	18.4	10.4	50	136	1554	15.7	34.6	23.3
68.5	50.5	8.58	205	42.6	36.2	92.2	1027	10.4	23.3	18.3
36.8	23.5	1.89	145	8.58	8.51	32.2	154	26.7	65.5	41.8
44.9	19.3	9.47	18.1	3.79	7.43	10.3	176	14.1	31.1	18.8
52.8	36.5	6.38	12.7	9.39	31.9	85.8	1065	12.2	44.1	38.9
52.3	44.9	40	195	47.8	4.87	18.9	500	14.1	24.1	19.1
61.5	43.7	3.16	54.2	15.8	20.4	41.4	433	15.5	36.2	38.5
114	86.6	4.66	66.7	6.55	7.91	26.7	679	10.8	20.9	20.4
49.6	34	6.21	129	14.6	18.1	41.4	352	21.1	56.2	41.8
12.2	10.1	35.2	44.1	14.7	20.7	63.2	764	13.6	34.6	18.6
36.8	21.9	5.73	16.5	13.1	13.6	29.7	777	32.8	63.8	91.4
42.9	31.1	1	200	15	22.5	56.7	914	12.4	36.5	18.1
35.2	19.8	10.9	359	72.3	8.28	43.3	195	2.71	30	22.5
67.9	50	28.1	34.3	8.28	20	42.2	426	15.7	27.9	38.2
37.5	20.5	6.38	12.5	3.34	11.1	48.7	319	18.8	57.3	31.9
50.5	31.6	3.49	118	23.9	16	44.1	578	15.5	38.9	35.9
56.2	57.3	10.6	114	17.6	9.56	43.3	1104	10.8	31.1	18.3
54.2	43.7	6.44	39.2	5.73	52.8	195	2571	15.4	34	28.6
25.5	18.6	7.3	15.8	6.98	6.38	17.5	139	17.3	47.4	52.3
35.2	30.8	5.14	1.57	8.2	6.55	26.4	478	14.6	41.4	18.1
39.2	35.5	20.4	21.7	17.8	9.47	17.8	509	13.6	36.2	75
37.2	23.1	1	142	5.83	8.13	36.5	615	42.9	85.8	47.4
35.2	26.9	6.85	10.9	4.91	6.26	26.7	189	12.4	49.6	37.2
51.9	31.1	10.7	32.2	6.21	6.67	4.83	165	14.3	39.6	24.6
5.73	10.4	1	209	18.4	22.5	207	2247	14.5	35.5	41.4
34.6	27.9	2.11	172	17.2	30.2	130	621	69.8	93.9	14.2
73.7	49.1	1	111	14.2	12.9	49.6	500	16.4	37.5	47.4
42.9	20.5	2.86	48.7	11.3	20.7	53.8	514	12.4	41.4	50.9
34.9	23.1	6.79	35.5	3.65	35.9	132	2129	19.8	42.2	7.57
44.1	24.8	42.2	85.8	41.4	14.1	34.9	483	15.3	27.6	47.4
52.3	33.7	13.2	57.3	7.99	13.3	42.6	403	21.1	49.6	43.7
42.6	30.2	5	10.6	5	14.3	47.4	474	16.8	40	24.6
4.49	7.17	6.85	109	17.2	11.4	36.5	483	10.2	21.3	9.65
37.2	32.5	10.6	63.2	12.2	14.6	36.2	621	33.7	77.7	76.4
103	82.8	8.28	213	29.4	8.35	30	328	26.2	55.7	47.8
31.9	35.5	2.17	34.3	10	13.1	36.2	352	15.1	44.5	18.9
38.5	16.5	5.88	136	25.3	26.9	55.7	685	57.8	127	106
42.6	26.2	4.53	114	12.4	13.6	54.7	1018	18.3	35.5	27.4
37.9	31.6	4	14.9	2.02	31.9	113	1370	33.7	79.1	132
83.5	50.5	5.05	63.8	10.1	10.4	32.5	267	18.9	40.7	34.9
42.6	19.3	9.31	11.2	7.91	17.3	33.7	538	13.2	34.6	23.7
50.5	29.4	5.88	20.4	9.39	29.2	73	626	1.06	40	5.28
67.9	95.6	38.9	262	44.1	38.2	59.9	557	16	50	46.6
44.1	32.8	7.64	132	22.5	15.1	38.5	313	16.1	21.9	2.23
75.7	53.8	1	2.44	487	22.5	60.4	638	70.4	94.7	8.98
64.4	46.1	4.14	62.6	5.42	39.2	98.2	1778	12.9	36.8	8.35
36.8	27.1	5.47	44.9	18.1	10.6	22.9	308	15.4	35.2	30
67.3	54.2	6.55	6.32	1	19.1	39.6	429	11.9	27.4	31.9
130	105	14.5	69.8	30.2	16.3	41.4	890	13.8	30.8	16.3
39.2	27.6	1	85.8	1.2	9.47	25.9	237	27.6	61.5	51.9
36.5	30	6.92	130	29.2	13.5	36.5	604	17.3	44.9	38.9
130	113	11.2	113	15.8	11.7	38.2	538	10.5	28.4	28.1
13	22.9	20.7	17.5	6.26	22.5	52.3	400	31.6	71	58.3
35.2	41.4	5.62	9.47	2.31	8.82	26.7	483	25.3	44.5	33.7
40.7	35.9	8.82	98.2	25.5	7.37	18.4	311	24.8	55.2	54.2
63.2	35.5	6.85	113	16.4	15.8	36.2	372	10.3	31.1	21.1
44.5	24.4	58.8	101	15.3	7.57	14.7	359	47	114	76.4
34.6	23.9	13.7	372	53.8	9.47	27.4	483	11.1	34.6	25
37.2	25.9	6.79	5.78	5.28	50.9	154	1186	15	34	26.2
64.9	48.3	2.97	132	11.2	18.6	38.5	626	18.9	35.5	41.4
71.7	72.3	22.1	22.7	10.8	24.1	73.7	757	8.13	31.3	21.7
40.7	16	33.4	209	25.9	12.4	56.7	483	13	20.2	27.6
142	123	27.1	37.2	10.2	44.5	161	2054	17.5	49.1	42.9
54.7	48.7	78.4	98.2	34.6	6.98	31.9	200	10.6	28.6	21.7
175	137	8.98	229	20.2	13.6	34.3	750	19.8	35.2	36.2
99.1	92.2	16.7	149	22.3	6.26	11	142	13.3	37.9	25.3
43.3	18.1	1	132	17.8	8.51	31.3	343	12.5	22.9	17.9
28.4	24.4	36.2	176	26.4	13.8	39.2	392	6.92	18.1	18.3
37.9	33.7	3.82	30.5	10.7	13.5	43.3	621	19.5	36.8	30.8
105	85.1	27.4	157	20.9	9.82	22.9	313	13.7	22.1	30.8
35.5	24.6	5.19	138	21.7	12.3	35.5	594	5.83	12.3	7.1
57.3	46.6	2.92	114	8.28	24.8	63.2	626	9.65	16.7	52.8
27.6	23.1	4.03	7.43	11.2	25.5	48.3	538	12.9	37.2	23.3
125	109	21.3	53.8	11.5	30.2	82.8	2187	1	8279	147
127	117	6.55	20.7	2.69	10.5	35.5	219	14.7	29.2	25.9
36.2	21.3	8.06	24.1	4.7	18.3	46.1	573	8.58	21.9	21.7
22.1	40.7	8.35	16.3	3.37	35.5	123	1382	8.51	16.7	13.3
31.1	30	10	44.5	8.58	15.7	47.4	478	10.3	19.8	35.2
52.3	47.4	6.38	13.2	20.5	16.7	43.7	552	1.49	6.21	5.14
31.3	28.6	7.5	11.7	4.26	8.9	35.2	505	26.7	27.1	4
35.5	21.3	25.5	28.4	21.7	26.2	41.8	355	18.3	39.6	41.4
22.9	1.37	5.83	57.3	12.6	3.85	17.3	132	16.3	34.3	28.1
48.3	37.9	1.79	160	14.1	15	37.2	453	1	112	5.62
21.9	17.5	27.1	340	67.9	1.05	4.26	31.3	1.29	69.8	1.7
34	28.6	29.7	52.3	8.51	9.91	30	173	7.3	22.9	25.5
50	34	11	129	24.1	12.7	38.5	615	19.3	40.7	20.9
233	276	21.1	40.3	11.8	20.4	44.1	509	15.1	32.8	29.7
40.7	37.2	73.7	483	66.7	12.9	30.8	267	74.3	99.1	15.3
66.1	48.3	1.22	150	11.9	10	32.2	523	44.5	101	82.8
62.1	41.4	7.37	47.8	6.67	4.91	19.3	533	11.3	21.9	23.9
63.8	36.8	10	55.7	7.37	17.3	41.8	410	13.2	44.9	16.7
42.2	23.9	11	28.4	6.98	40	90.6	991	8.74	17.2	8.13
18.8	18.8	16.7	44.5	3.62	20.4	44.9	644	25	40.3	56.2
43.3	24.6	13.5	322	57.8	47.4	118	1219	25.3	58.8	38.2
27.9	16.4	9.82	13.1	6.32	9.06	49.1	1046	20	51.4	25.3
36.2	27.6	2.07	130	9.65	23.3	117	704	62.1	184	136
42.2	28.4	4.37	71.7	28.1	69.2	233	3338	10.9	25.3	20.4
34.3	16.1	6.26	13.8	2.62	19.3	31.6	599	5.67	17.9	29.7
130	97.3	6.73	102	19.6	14.1	34	519	12.6	33.4	31.6
47	36.8	9.47	10.9	4.91	17.8	69.2	1286	28.9	58.8	62.6
100	103	29.4	18.8	7.5	25.7	47	496	55.7	139	202
14.1	29.4	1.78	10.6	5.88	16.4	39.6	567	23.7	35.9	58.8
44.9	32.5	1	368	32.8	32.8	46.6	573	13	25.5	12
37.2	65.5	17	43.3	13.5	16.3	35.5	632	101	253	219
28.9	16.4	1	112	15.3	13	26.4	331	14.7	28.6	47.4
2.48	2.02	4.29	124	13.8	8.9	21.9	692	42.2	104	138
93.1	79.9	5.62	16.1	1	12.6	36.5	294	13.6	31.1	18.3
28.4	31.9	10.6	65.5	8.82	11.1	35.2	343	12.3	28.4	49.6
38.9	17.6	10.8	244	32.8	9.82	32.8	308	12.5	25.7	22.5
106	114	6.49	300	38.5	9.47	37.5	346	34.6	69.2	45.7
34	15.3	13.8	8.06	1	6.55	17.6	538	7.7	24.1	25.5
141	118	12.1	259	33.7	10	35.5	519	26.7	56.7	63.2
30.8	27.1	4.57	10.1	2.02	24.1	43.7	626	13	23.3	36.8
32.8	14.1	4.26	8.51	2.5	51.9	129	1000	10.3	33.7	31.3
25.5	28.9	8.43	72.3	1.91	17	32.2	200	13.2	31.1	20.2
40.7	31.9	46.1	53.3	20.5	36.5	126	1094	14.6	34	50
37.9	16.3	14.7	35.5	1	25.9	53.8	286	17.5	27.4	12.9
28.1	15.4	3.52	44.1	7.64	37.2	73.7	500	13	29.7	15
88.2	77	6.44	13.6	10	23.3	66.1	956	18.6	37.2	14.7
55.2	38.2	26.7	32.5	13.2	13.7	40.3	349	26.7	71.7	66.1
178	223	13.1	80.6	27.6	14.2	39.2	389	17.3	47.8	33.4
39.6	25	1.88	1.86	3.55	31.3	76.4	1000	15.8	32.8	19.8
29.7	22.3	5.99	111	15.1	23.5	49.6	661	13.7	35.2	23.7
102	104	8.58	16.7	3.49	16.3	47.8	470	20	39.6	35.5
34	29.4	20	86.6	25	21.1	36.8	284	11	24.1	17.5
100	85.1	8.74	255	43.7	27.1	77.7	692	9.22	21.5	42.6
43.3	23.1	36.5	77.7	22.3	15.1	41	379	10.8	31.6	26.9
41	34	19.6	27.9	3.31	23.7	78.4	610	51.4	105	112
39.2	27.1	17	16.1	10.8	28.4	104	1000	15	31.6	18.3
36.5	23.9	9.91	18.3	1.89	56.7	149	1208	9.82	34.6	26.7
44.5	31.3	6.38	10.5	1.81	10.9	25.7	262	10.9	35.2	25.9
183	141	5.19	61.5	10.1	30	71.7	644	10.7	24.8	16.1
27.6	26.4	6.98	13.8	6.61	15.8	36.8	965	22.7	63.2	69.8
80.6	61.5	17.5	48.3	9.06	8.51	29.4	311	54.2	121	111
35.5	28.4	10.6	289	40	10.4	31.3	764	10.7	27.4	34.9
38.5	25.7	4.91	74.3	6.49	12.7	34.9	764	24.1	47.4	41
53.3	57.8	45.7	289	47.8	8.98	28.9	396	16.5	47.4	32.8
119	90.6	7.37	178	38.2	33.1	41.4	461	15.1	29.2	30.5
42.9	52.3	18.1	30.2	16.4	11.8	31.9	403	31.6	55.2	59.4
43.3	24.1	12.1	71	16.5	20.2	60.4	828	18.1	41.8	23.7
138	165	1	103	9.22	30.8	100	1640	14.5	35.5	30.5
141	125	5.83	11	1.86	23.1	49.6	453	33.7	76.4	74.3
108	92.2	9.82	1	6.04	7.7	32.5	410	25	65.5	70.4
105	67.9	7.17	10.5	12	10.6	31.1	562	27.1	49.1	67.3
57.3	38.2	31.9	37.2	16.7	11.5	44.1	359	1.3	55.7	3.16
49.1	46.6	68.5	154	51.9	9.65	23.7	372	7.91	31.1	38.9
38.5	16.3	5.94	64.4	3.72	15.7	34	437	16.1	37.9	35.2
11.3	18.3	2	70.4	13.6	27.9	107	843	12.5	39.6	22.5
142	136	9.14	16.4	8.82	11.3	17.3	289	14.3	37.2	32.5
50.9	14.9	5.42	86.6	10.4	6.21	26.4	343	9.14	73.7	31.6
36.8	27.4	10.8	12.5	3.75	5.88	25.5	138	71.7	97.3	2.13
40	13.9	9.82	12.4	16.4	53.8	113	1670	4.66	5.52	10
26.2	27.1	15.1	139	16.4	15.7	37.2	820	14.7	32.2	42.6
38.9	23.1	3.4	110	21.3	10.7	31.6	379	7.99	27.1	32.8
40	22.1	9.73	5.62	1.47	27.6	69.2	1472	4.49	19.1	4.91
23.3	22.5	2.07	131	16	15.1	40	359	1	147	9.73
57.3	42.6	5.73	38.5	12.5	26.7	84.3	1186	50	125	155
62.1	52.8	4.26	274	46.6	15.7	50	184	8.66	20	4.83
38.9	28.1	2.27	109	16.5	19.1	66.1	514	12.2	28.6	21.1
93.9	81.3	25.5	38.5	19.1	11.8	47	396	8.13	41	34.6
20	28.1	30.8	34.3	6.04	20	44.9	474	1	20.2	56.2
36.8	21.5	9.14	130	23.1	18.8	43.3	365	13.1	26.4	12.3
36.5	29.4	13.1	67.3	21.7	7.64	30.8	528	47.4	101	114
28.4	31.3	16.7	46.6	6.32	40.3	124	1395	75	219	219
157	133	10.1	26.2	4.22	14.2	32.5	343	23.1	43.3	20.9
30.2	23.1	1	121	14.1	6.1	19.5	173	17.3	31.6	33.7
29.2	18.1	6.44	40.7	13.1	12.6	33.1	437	12.6	59.4	39.6
33.7	19.3	5.57	30	12.1	12.2	40.3	461	1.63	9.65	11
54.2	47	3.96	75	8.35	39.6	99.1	906	7.7	17.3	19.3
30.5	29.2	7.7	101	15.4	16.3	37.9	365	44.5	111	81.3
44.1	36.2	10	313	49.1	8.66	38.2	337	14.9	35.9	37.2
90.6	103	3.75	108	12	12.9	36.5	588	23.9	69.2	61.5
30.5	17.5	87.4	83.5	26.9	10	31.1	523	17.5	53.8	36.8
23.1	12.4	10.2	17.6	1.29	11.3	67.9	337	53.8	112	154
41.8	20.2	10.4	32.2	11	34.3	173	1540	11.5	47	41.8
45.7	40.3	73.7	241	34.9	18.9	61	457	14.6	31.1	41
28.4	23.5	6.61	86.6	20.4	9.82	30	362	20.2	50.9	29.4
75	44.9	5.78	37.5	3.16	8.82	22.5	764	13.1	55.2	57.8
55.7	52.3	6.61	219	34.3	7.7	43.7	184	6.98	31.6	12.6
19.5	21.3	3.13	12.6	11.7	10.8	53.3	931	11.2	33.1	27.4
30	35.9	8.13	49.6	23.9	85.1	300	4914	114	165	3.96
9.31	1.83	4.1	85.8	16.5	10.7	32.5	334	17.5	36.2	28.1
83.5	62.6	11.2	20.7	6.21	44.1	114	1625	17.2	53.3	38.5
55.2	47.8	5.94	25.9	4.96	11	32.5	414	38.5	90.6	121
47.4	30.8	21.9	271	53.3	24.6	96.5	2458	46.6	88.2	91.4
58.8	41.8	4.14	85.1	7.64	16	35.2	292	13.7	35.9	31.1
50.9	33.1	5.19	7.64	2.53	24.1	53.8	737	17	44.1	29.2
64.9	38.2	13	176	30.2	16.4	33.7	437	8.06	28.1	20.4
123	90.6	2.59	151	5.83	15.1	53.8	1065	122	154	33.7
54.2	36.2	35.2	121	39.2	23.1	44.1	410	10.1	36.8	32.2
27.6	27.1	2.33	44.5	2.19	14.2	49.6	328	27.4	62.6	56.7
34	25	11.8	6.85	19.3	18.1	61	379	24.6	87.4	85.1
24.8	34	29.2	231	38.9	25.5	78.4	1252	13.9	37.5	49.1
64.4	57.3	1.96	71	7.99	10.3	54.7	422	18.4	41	64.4
41.4	30.2	1.86	173	8.9	26.7	143	429	19.1	37.2	41.4
92.2	94.7	4.61	53.3	12.9	7.23	21.5	514	94.7	145	24.1
48.7	37.2	11.7	23.1	3.68	18.9	40.7	835	9.47	41.8	26.7
47	44.1	6.85	42.9	9.47	9.39	30.5	466	17	32.8	1
35.2	24.8	15	24.1	20.4	23.9	42.9	445	25.5	63.8	57.8
31.6	23.5	9.39	253	31.9	16.5	47.8	379	14.1	27.4	25.5
45.7	48.3	15.1	30	1	10.8	40	445	9.06	30.8	26.4
38.5	27.1	5.38	9.73	5.42	46.6	112	1877	1	60.4	2.89
32.5	17.8	70.4	46.6	10	54.7	154	1611	35.5	104	77.7
60.4	53.3	31.6	193	47.8	16.5	36.8	538	15.4	31.9	42.9
30.5	42.2	1.21	82	6.44	14.9	65.5	991	23.1	49.6	44.5
47	23.7	2.84	9.91	3.11	17	30.2	426	29.2	51.4	44.9
56.7	50	9.65	178	39.6	19.8	81.3	1715	15.3	35.9	19.6
67.9	40.3	4.45	22.9	5.62	15.1	47.8	1322	10.5	30.2	33.1
207	151	3.11	132	12.4	41	113	2148	15.7	41	28.9
120	101	1.67	77.7	14.1	37.2	124	698	19.1	49.6	53.8
24.6	27.6	1	229	15.5	26.7	41.8	552	13.5	54.2	67.3
26.9	22.7	1	4.22	5.67	21.7	79.9	1395	16.8	34	50.9
55.7	50.5	6.15	68.5	3.52	6.67	38.9	132	11.8	23.3	27.1
44.5	38.2	7.3	10.9	3.34	32.2	97.3	1334	4.03	19.8	62.6
139	110	1	300	30.2	13.5	34.3	365	24.4	57.3	49.6
64.4	48.3	5.57	131	8.9	13.5	57.3	328	11	29.7	29.2
35.5	23.3	25.7	27.6	24.6	15.3	37.5	478	61.5	123	94.7
37.5	30.5	6.73	67.9	18.8	14.5	43.7	453	12.6	39.2	25.7
40.7	19.8	9.91	38.2	18.1	10.9	21.5	281	25.3	51.9	38.9
173	137	19.8	137	14.2	18.9	47.8	426	7.5	23.5	20.7
46.6	31.1	1	127	14.2	15.1	37.5	528	7.5	27.6	23.9
37.5	20	13.9	334	49.1	13.1	38.9	509	20.4	41.8	22.3
40	29.4	22.1	25.3	9.39	51.4	163	1512	73	172	123
31.3	25.9	17.6	223	7.99	24.4	45.3	514	17.8	36.2	36.8
58.8	43.7	1	155	24.4	24.6	92.2	1670	7.23	9.65	4.29
56.7	52.3	4.87	67.3	7.91	30.2	45.7	271	38.2	64.4	12.2
36.2	24.8	10	9.47	4.22	17.3	49.6	578	12.1	8.66	20.4
31.3	18.6	14.3	241	51.4	36.5	57.8	311	24.6	54.7	49.6
42.9	27.1	11.3	241	32.8	5.57	19.5	109	15.4	31.9	22.7
34	26.4	5.05	31.3	15.3	14.3	62.6	382	13	39.6	26.4
37.5	34.3	6.92	18.4	7.43	22.1	62.6	528	6.04	27.6	28.9
28.1	18.6	25	131	34.9	50.9	130	1554	19.1	38.5	59.4
41	38.5	43.3	331	50.5	10	36.2	557	11.9	31.9	15
47.8	39.2	1.43	89.8	9.14	17.3	41.4	359	10.2	23.3	27.1
154	124	16.7	334	37.9	15.4	32.8	294	18.9	42.2	45.3
42.2	23.1	36.5	22.1	9.65	8.2	21.3	610	35.2	63.8	88.2
20.2	32.2	8.28	13.6	5.19	7.77	23.5	403	1.5	14.6	22.3
113	92.2	4.37	86.6	4.22	24.4	101	2618	22.7	47.8	56.7
35.2	26.7	7.91	76.4	12	17.5	41.4	426	19.5	39.6	41.4
41	31.9	8.66	10.7	4.7	4.49	10.5	178	11.9	25.3	36.2
93.1	69.2	11.1	95.6	16.8	11.8	22.3	453	20.9	23.5	23.5
28.9	24.1	4.96	46.1	7.57	13	47.8	316	11.9	30.2	24.4
46.6	35.2	1.49	83.5	3.89	8.66	30.2	426	16.4	31.1	29.2
69.8	67.9	3.62	56.2	10.6	12.9	29.2	346	1.2	63.8	7.1
31.9	23.7	6.15	64.9	11.9	50	133	1407	12.7	34.6	25
25.7	20.4	6.1	286	20.2	27.4	63.8	991	17.5	46.1	35.2
27.6	6.32	56.7	189	42.9	10.3	38.5	385	21.3	53.8	56.2
47.4	33.7	10.7	400	58.3	30.2	77.7	583	17.3	51.9	51.4
82.8	112	5.33	8.98	7.91	20.2	40.7	533	12.9	32.5	27.6
52.3	35.2	11.4	16.3	1	6.15	36.8	588	19.6	55.7	37.5
35.9	24.8	10.7	7.64	8.51	12.5	50.9	305	69.2	110	44.1
176	133	6.79	10.9	9.56	41	113	1208	15.5	50.5	75.7
57.8	46.6	8.98	365	59.4	15.3	36.8	538	16.5	33.7	45.7
44.9	21.5	11	102	8.82	10.6	49.6	578	11.8	30.2	20.9
179	118	11.1	129	12	12.5	52.8	418	9.91	30.8	44.1
57.8	44.5	25.5	34.6	15	21.9	56.2	505	5.23	124	1
67.3	89	5.73	20.5	1.79	28.6	73.7	799	36.5	80.6	100
47	36.5	5.83	126	23.7	19.8	51.4	610	33.7	73.7	63.2
33.7	19.6	12.1	111	16.8	13.9	30.8	375	12.7	28.1	34.3
21.7	22.3	4.22	11.3	1	9.56	45.3	292	21.3	59.9	39.6
44.1	30.8	9.56	48.7	15	18.3	74.3	557	21.3	40.3	52.3
40	22.7	1.72	118	9.47	30	75	835	25.3	73	77
44.5	27.4	29.2	26.2	5.47	34	135	2436	52.3	154	172
143	92.2	6.85	27.6	1.27	16.8	35.2	557	14.9	27.6	7.43
47	30.8	9.56	186	34.6	12.3	31.3	331	34.9	98.2	107
28.1	27.4	6.21	300	52.3	10.9	31.9	340	13.3	41.8	18.9
257	200	40.7	41	13.7	7.43	42.6	271	43.3	155	92.2
118	103	12.1	279	46.6	7.37	47	79.1	14.6	37.9	40
110	88.2	6.73	8.35	2.44	6.85	26.2	567	25.9	91.4	82.8
30.5	23.1	41.8	124	20.2	14.3	29.4	453	12.4	34.9	16.1
85.1	54.7	1	173	9.39	8.9	27.4	483	10.9	28.4	30.5
32.8	23.9	6.55	198	28.9	24.4	94.7	1843	14.9	33.4	20.2
32.8	27.9	12.2	100	6.67	8.98	38.2	947	32.5	65.5	56.7
35.5	22.7	5.73	11.4	4.1	16.8	77.7	483	93.1	209	170
61	44.9	4.91	85.1	6.21	20.4	56.7	1568	63.8	91.4	13.3
49.6	31.9	32.8	19.8	8.06	39.2	127	750	15.4	34.6	34.9
225	248	5.94	41	8.2	20.7	76.4	1611	21.9	45.3	47.4
66.7	55.2	1.39	207	18.8	11.8	28.9	965	10.9	22.7	17.6
129	87.4	6.73	67.9	17.6	26.9	47	426	12.4	33.1	27.1
27.1	18.3	10.5	89.8	12.5	23.1	61	505	14.1	25.7	19.5
56.7	40.7	22.7	248	55.7	9.39	27.9	355	15.4	37.9	33.1
41	23.3	7.64	44.1	20.5	8.9	20	313	16.5	36.8	37.9
35.2	24.6	12	23.3	6.32	11.7	27.6	433	22.7	44.1	33.1
41	23.9	7.91	15.5	2.11	23.1	73	1512	5.52	18.9	10.9
51.4	73.7	14.1	119	20.2	8.66	26.2	466	12.6	28.6	20
50.9	27.6	21.1	121	27.9	17.8	40	414	21.7	66.7	38.9
109	66.7	8.58	5.28	5.19	12.6	30.8	470	11	35.2	42.9
60.4	42.6	2.11	89.8	12	4.53	22.3	231	5.78	36.5	34
37.5	17.3	18.6	142	10.6	15.5	38.5	698	11.3	44.5	39.6
68.5	55.7	9.31	13.1	9.39	24.8	47.4	533	18.3	40.7	30.8
106	97.3	7.64	262	37.9	20.5	91.4	1582	225	429	44.9
122	129	3.55	131	16.1	10.6	37.2	403	18.1	40.7	18.9
42.9	37.2	22.3	34.6	13.3	23.1	41.8	632	9.31	15.1	9.91
36.5	25.7	41	292	35.9	11.9	25.5	316	30.5	69.8	85.8
109	98.2	1.25	135	20.5	7.84	23.9	557	6.85	19.1	3
51.4	45.7	19.5	83.5	11.2	45.7	113	178	15.4	35.5	26.4
37.2	23.9	6.15	54.2	5.94	5.88	21.1	547	20.7	41	31.1
110	123	36.2	150	34	36.2	69.8	594	14.5	19.1	19.8
55.7	44.1	9.14	50	6.49	19.6	62.1	1334	10.3	23.7	15
36.2	24.6	4.87	6.79	1.01	12.9	44.1	407	15.5	31.9	29.4
29.7	27.6	3.11	23.5	9.22	29.2	62.1	770	17.3	46.6	41
24.8	22.1	3.28	42.6	3.72	13.3	31.3	483	52.3	136	131
57.8	59.9	2.55	73.7	5.99	5.47	2.62	141	39.6	85.1	106
38.2	12.3	6.04	155	7.04	5	18.4	461	10	35.9	28.9
27.1	20.2	1.35	168	13.2	13.8	30.2	346	14.7	47.4	12.7
40.7	35.2	21.9	27.4	2.25	28.4	81.3	1055	17.3	37.2	49.1
43.3	30.2	8.13	105	19.1	19.8	85.8	1286	12.2	26.2	17.6
39.2	20.2	8.66	37.2	15.3	4.33	8.58	184	16.1	43.7	21.1
235	183	4.57	47.8	13.8	9.47	29.4	328	17.9	31.3	26.7
42.9	24.1	4	57.3	19.8	14.3	33.4	470	12	31.3	28.9
31.6	23.7	4.61	102	5.33	13.8	34.6	389	18.4	38.5	39.6
51.4	44.1	31.3	155	44.5	17.9	34	505	15.7	32.5	13.7
55.7	47	32.5	70.4	25.9	34.6	112	1655	17.2	33.4	36.5
110	132	20	30.2	5.99	50.5	153	2091	9.22	26.4	48.7
57.3	46.1	21.3	27.4	17.2	15.8	52.8	835	17.2	43.3	14.3
69.2	47.8	5.19	12.6	5.09	14.1	32.8	547	13.5	54.2	48.3
38.2	25.3	3.59	102	21.5	20.4	50	1219	21.3	36.5	33.4
123	112	5.99	55.2	3.62	10.6	31.1	743	14.9	40.3	27.1
41	28.1	2.92	89	15.5	8.51	8.43	186	8.66	24.8	14.5
41.4	41	10	6.55	5.88	15.8	56.2	429	12.6	39.6	3
41.8	33.4	5.47	313	43.3	12	44.5	302	16	32.2	28.9
131	79.1	11.1	19.6	5.57	16.4	63.2	1358	12.6	19.5	20
30.2	18.1	17.2	102	30.5	11.7	32.8	343	21.1	32.8	47.4
155	121	9.65	10.9	12.5	4.1	22.1	38.2	3.79	19.6	20.4
35.2	25.9	6.04	39.2	12.6	18.3	62.6	1946	2.33	41	9.65
93.1	130	9.14	9.65	7.17	16.4	44.9	898	15.1	40.3	20.7
55.2	28.4	14.2	26.9	15.5	5.62	13.8	153	9.65	15.8	2.48
31.6	34.3	2.44	61.5	16	8.98	28.1	533	12.1	30.5	19.3
64.9	45.7	2.74	163	3.43	30.2	119	750	19.6	38.9	6.26
30.5	21.5	18.6	25.5	16.3	23.3	53.8	466	15	28.9	35.9
65.5	58.3	4.96	200	26.9	10.9	32.5	466	13.7	49.6	37.9
16	25.5	8.74	10.2	7.43	10.4	22.7	496	9.91	32.8	22.3
98.2	75.7	9.73	94.7	23.1	34.3	154	1055	46.1	102	172
37.2	30.5	13.2	17.9	2.62	9.22	30.5	784	10.8	14.2	6.92
28.1	17.5	8.51	17.8	7.99	10.2	44.9	426	12.9	44.5	41
22.7	17.2	8.9	8.2	14.3	11	16.3	349	17	34.3	53.3
62.1	48.3	2.41	202	31.9	25.3	42.6	583	16.3	43.3	84.3
34	25.3	6.1	10.3	8.28	42.6	88.2	1346	13.9	38.9	33.7
32.8	28.1	1.49	145	9.82	10.6	28.9	294	39.6	82.8	46.6
31.6	45.7	5.38	181	25.3	19.1	37.5	400	10.6	40	22.5
28.4	23.1	5.88	68.5	5.47	9.91	26.4	621	29.2	57.3	31.6
26.2	24.4	9.65	7.5	2.74	12.3	30.8	449	17.6	29.4	43.3
50.5	41.4	6.79	88.2	8.43	15.1	32.5	322	52.3	102	79.1
41.8	23.7	12.4	101	13.7	10.3	34.3	478	16	34.6	27.9
223	145	5.67	40.3	5.23	19.8	66.7	1420	34.9	72.3	58.3
99.1	60.4	1.88	118	13.3	11	19.6	385	10.9	36.5	40
93.9	24.1	1	223	12.9	8.9	25.9	410	23.1	40.7	35.9
36.2	25.5	9.06	13.8	7.57	8.98	25.5	523	17.2	44.5	37.5
88.2	66.1	10.6	15.3	3.96	10.5	37.5	284	18.1	49.6	30.5
32.5	27.4	5.99	12.2	2.67	15.1	43.3	343	22.9	45.7	35.5
47.4	32.2	4.33	9.22	3.92	48.7	179	1540	19.5	47.4	64.4
20.4	13.3	33.4	27.9	9.73	11	30.8	433	13.1	31.3	26.2
24.6	22.3	8.74	257	59.9	18.9	28.1	828	47.4	103	95.6
41.4	42.6	4.26	31.1	7.23	16	40.3	346	12.2	26.2	17.2
1.01	2.62	13.2	56.2	13.2	14.6	38.2	533	43.7	89	69.8
6.26	1.63	3.89	12	1.47	9.39	30.5	313	20.9	54.2	53.8
129	85.8	1	267	8.66	47	149	1611	27.4	48.7	38.9
35.5	29.2	12	359	47.4	7.37	28.9	578	39.6	73	102
27.6	20.4	19.5	47.4	34.9	47	142	1640	4.18	13	32.8
34.3	22.1	2.84	100	15.4	6.85	28.1	289	19.5	45.3	50.9
32.2	18.3	57.8	30.5	1.96	11.7	28.4	407	25.5	47.8	8.98
34.9	24.8	10.6	36.8	22.3	12.3	40	385	7.3	94.7	5.09
30.5	16.4	4.1	16.8	8.43	45.7	151	1685	14.9	52.3	40.3
28.1	20	4.41	59.4	6.79	31.3	54.7	685	21.9	43.7	21.5
64.9	40.3	3.16	325	20.4	21.3	70.4	2129	32.5	82.8	70.4
27.6	32.8	5.38	209	10.8	36.5	90.6	1568	16.4	42.6	49.1
97.3	106	41.4	147	23.9	55.7	198	2595	9.39	18.9	19.1
34.9	27.4	5.99	83.5	16.7	9.65	27.9	305	10.3	22.1	27.6
64.4	63.8	1.47	47.8	3.16	9.39	23.7	375	9.56	36.2	40.7
50.9	37.9	8.35	6.38	6.15	14.6	57.3	422	2.02	80.6	7.37
143	155	20.5	24.1	9.91	5.78	28.6	478	15.1	21.5	21.3
23.9	28.6	2.19	153	9.82	12.4	18.6	478	10.2	33.4	19.6
126	100	1.83	70.4	13.7	13.7	62.1	757	20.5	34.3	31.6
56.7	30	11.7	18.6	1	27.9	64.9	562	13.8	38.2	23.9
29.4	30.2	27.9	225	34.9	13.3	26.7	594	22.9	47.8	70.4
25.5	23.7	14.6	400	60.4	21.3	44.1	337	22.5	63.2	58.8
41.8	27.1	21.3	19.8	11.2	21.5	71.7	422	13.9	32.5	35.5
79.9	64.4	1.29	94.7	6.98	13.1	20.2	365	1	3.16	7.3
29.2	15.3	4.26	99.1	13.6	6.32	28.9	418	12.3	28.1	19.3
20.5	21.5	20.5	30.2	6.73	828	1176	343	106	163	38.5
77.7	51.4	25.7	343	55.2	12.4	50	1018	15.5	24.4	30
55.2	41	9.91	4.29	12.3	12.5	31.6	562	59.4	139	75.7
89	47	4	122	14.6	6.73	21.9	191	16.3	38.2	30.2
84.3	63.2	6.98	28.6	5.78	28.9	43.3	594	13.9	25	14.5
29.2	26.4	8.06	6.85	1.6	17.3	38.5	410	11.4	37.9	21.3
50.5	40.3	40.3	328	24.8	15	40	578	58.8	161	124
34.9	26.9	4.03	66.1	6.85	35.2	89	3523	20	43.7	31.1
28.4	22.5	14.2	44.1	19.5	16.5	78.4	319	1.53	44.9	7.04
32.2	15.1	5.19	414	43.7	87.4	281	4451	14.1	15.1	30.8
61	50.5	6.15	58.3	7.91	20.7	75	1208	21.9	34.3	27.6
43.3	30.2	4.87	10.2	4.61	19.8	34.3	403	18.3	47.4	44.1
31.1	26.2	26.7	25.5	17.9	10.4	26.9	262	62.1	160	204
33.7	21.5	48.3	70.4	28.9	6.85	20.9	313	1.95	50.9	2.48
38.9	35.5	22.9	302	47.4	6.98	47.4	195	10.9	30	31.1
36.2	23.7	5.33	147	29.7	10.4	24.8	673	69.8	215	183
66.1	57.3	50.5	84.3	25.9	8.13	18.1	334	12.5	43.3	32.8
40.3	32.8	8.9	17.8	7.84	16.3	56.7	466	71	77.7	30.2
75	71	16.4	54.2	15	15.4	39.2	429	10.7	29.7	38.9
106	85.8	13.5	15.1	8.2	11.5	38.5	400	45.7	112	99.1
37.2	23.9	12.5	276	30.5	17.9	45.7	400	14.9	47.8	52.8
39.2	27.4	6.67	198	30.8	11.8	35.9	519	10.5	39.2	27.1
22.3	17.3	10	15.8	10.9	15.1	44.1	567	13	42.9	23.7
30.2	28.6	33.4	111	29.7	16.7	34.9	319	26.7	65.5	78.4
23.5	13.2	7.99	13.3	8.28	10.6	30.5	514	14.6	34.9	62.1
34	17.2	4.45	11.8	4.18	7.57	20.4	449	4.74	22.1	13.2
34	26.7	33.4	19.1	10.2	18.8	46.6	418	19.3	48.7	33.4
64.9	58.8	1.65	221	32.8	12.3	24.4	407	48.3	132	125
57.3	40.7	6.98	29.4	7.17	40	147	1827	21.7	46.6	29.2
91.4	63.2	13.9	28.6	10.6	12	66.1	300	92.2	173	12.9
44.5	26.4	4.87	15.3	7.91	12	35.5	604	15.3	44.1	33.7
55.2	41.8	14.2	365	32.5	8.06	42.6	211	20.4	44.5	40.3
46.6	45.7	2.48	85.8	18.8	20.7	42.2	352	36.2	47.4	55.7
37.9	29.4	28.9	29.7	19.6	7.5	30.5	372	36.2	79.1	43.7
149	115	13.7	50.9	15.1	14.2	50.5	396	31.1	82.8	71
46.1	21.1	6.85	123	17	17.6	43.3	466	25.7	38.2	50
43.3	35.2	2.41	67.3	12.1	13.8	43.3	334	15.8	35.9	32.2
28.6	17.8	10.3	126	9.82	15.3	43.3	843	7.91	32.2	17.5
29.4	18.3	42.9	241	60.4	8.35	22.9	828	15	27.9	24.1
31.9	22.5	14.9	250	33.1	26.7	89.8	2525	10.9	22.3	3.52
23.3	22.1	5.73	81.3	17.8	8.13	29.2	207	15.3	33.7	54.7
32.5	17	7.7	22.5	8.9	38.5	106	1407	20	38.5	4.37
52.8	65.5	5.67	60.4	5.05	14.2	38.9	478	13.1	21.9	23.3
30	27.9	41.4	50.9	7.43	12.9	55.7	906	16	34	17.3
44.5	41.8	45.7	50.9	6.92	11.5	33.1	328	23.1	54.7	59.4
239	184	4.66	302	27.4	7.7	44.5	129	14.7	37.5	36.8
35.2	23.3	2.79	59.9	12.3	15.7	42.6	474	33.1	70.4	92.2
66.1	48.3	21.1	305	43.7	6.38	23.5	87.4	59.9	131	170
33.7	29.7	32.8	400	28.6	46.6	110	1263	11.9	34.9	16.5
149	96.5	7.37	106	9.56	10.9	34.9	509	15.4	42.6	42.6
30.8	19.6	1	154	14.1	11.4	56.7	965	3.79	38.2	10.4
43.7	25.3	15.7	305	34.3	10.6	32.8	437	25	47.4	40
25.7	23.5	7.43	31.3	3.92	12.7	43.7	874	5.52	42.2	4.22
