# Supplementary material
Source: ML conference proceedings conference paper supplement (https://openreview.net/forum?id=nrbR2F29vU)
Supplement: supplementary_material [file 13. cd3cd28icam2+u0126.xls]

## Sheet: Sheet1
praf	pmek	plcg	PIP2	PIP3	p44/42	pakts473	PKA	PKC	P38	pjnk
21.9	25.9	9.91	211	62.1	27.4	43.7	573	11.2	41.8	50
28.1	20.4	6.73	186	38.5	10.2	57.8	583	10	52.8	45.7
75	69.8	85.1	65.5	35.2	43.3	111	3368	14.5	49.6	93.1
34	29.2	16.5	30	6.49	29.4	46.6	562	17.3	56.2	193
21.7	25.5	9.14	16.4	15	25	51.9	922	7.91	13.8	30.8
267	149	4.87	84.3	23.5	13.9	43.7	2187	16.1	36.8	98.2
20	17.9	18.4	22.1	14.2	22.1	61	2267	18.9	70.4	313
1	4.14	8.58	25.5	1.03	17	44.5	991	7.23	25	87.4
34.3	45.3	29.4	20.2	17.6	10.6	30	1165	7.3	20.9	59.4
30.8	17	81.3	62.6	24.8	59.9	146	3429	7.91	31.3	60.4
31.3	18.9	105	69.2	50.9	25.7	62.1	1946	17	41.4	107
39.2	31.3	77.7	57.8	29.7	18.3	50.5	890	28.9	72.3	145
22.5	24.8	12.5	36.2	24.8	48.3	120	2763	22.7	56.2	109
30.5	20.9	60.4	67.9	31.3	15.7	42.9	799	8.9	33.1	62.1
15.8	47.8	6.67	16.8	6.61	14.7	31.9	813	17.5	41	82.8
32.2	42.2	12.7	28.4	30	1	1.49	47	8.2	26.9	51.4
66.7	71	1.18	207	17.8	82.8	170	4451	22.5	33.1	86.6
99.1	66.7	14.7	89.8	2.44	78.4	186	4491	13.7	42.2	74.3
70.4	54.7	135	211	82.8	25.3	62.6	1499	8.2	25	46.6
1	9.47	6.61	7.37	16	26.7	53.3	1275	40.3	93.9	117
35.5	40.3	30	145	47.4	20.4	42.6	692	12.9	53.3	75.7
102	70.4	8.06	16.3	2.09	23.3	69.8	2129	20.5	50.9	90.6
35.5	22.5	40	449	95.6	9.73	36.2	1197	10.8	39.2	64.9
24.6	22.1	39.2	32.5	21.9	34.6	67.9	491	16.5	46.6	65.5
89.8	81.3	85.8	79.9	10.2	129	231	4068	30.2	82.8	132
52.3	47.4	6.79	8.2	12.1	21.9	40.7	632	18.9	65.5	126
7.84	2.64	11.9	118	17.3	47	92.2	2072	13.8	47.4	151
16.3	13.6	13.8	22.3	3.65	17	47.4	1124	42.2	154	500
20.2	23.9	13.2	207	71.7	24.6	44.9	1963	30.8	123	289
34.6	27.4	8.43	9.73	6.26	50	97.3	835	26.9	66.7	109
22.5	20.7	7.5	340	36.2	22.1	37.9	583	34.6	114	223
24.4	23.1	64.9	50	27.9	26.4	49.1	743	28.4	75.7	111
58.3	50.5	40.7	58.3	30.5	26.2	50.5	567	42.6	131	259
154	79.1	36.2	37.5	6.21	8.06	25.7	599	13.5	34	54.7
21.1	20.5	3.65	136	5.83	25	58.3	698	10.3	24.6	51.4
37.5	28.6	18.9	143	29.2	37.9	94.7	2308	19.1	79.9	121
257	150	9.56	14.5	12.5	18.4	43.3	965	11.7	50.9	94.7
22.3	30	4.07	157	46.6	28.4	67.9	743	5.94	22.5	39.2
80.6	69.2	31.9	241	22.7	17.8	46.1	1263	25	50.9	150
24.4	23.9	8.66	103	11.8	26.9	36.5	466	28.9	120	302
16.3	18.6	5.73	131	25	17.6	63.8	1762	27.9	56.2	103
29.2	24.6	11.2	12.7	8.2	7.5	23.7	188	7.04	15.1	41
6.61	4.74	2.74	9.14	1	11.2	40	644	14.7	30.2	84.3
93.9	78.4	23.7	18.3	18.3	47	131	6378	19.1	45.3	69.8
41.4	53.8	3.34	305	30.8	14.1	43.7	679	9.47	41	150
38.5	20.9	7.23	82	19.3	17.2	42.6	704	22.9	70.4	145
31.9	17	6.67	10.5	46.1	27.6	42.9	710	30.8	114	331
63.8	44.5	9.39	15.4	17	10	31.9	858	10.8	23.3	97.3
23.7	19.8	38.9	25.3	19.3	16.4	31.6	764	15.8	52.8	126
143	71.7	57.8	246	77	15.1	22.7	710	10	24.1	51.9
22.1	28.1	12.7	10.8	7.04	77.7	115	799	38.9	92.2	146
41	36.2	1	120	31.6	16.4	35.5	770	9.39	39.6	52.3
22.3	25.7	2.76	149	22.3	25.5	55.7	583	29.2	86.6	130
28.6	19.1	6.1	84.3	16.7	18.9	53.3	1625	24.8	118	215
28.4	17.9	1.25	139	22.7	91.4	184	3752	27.9	71	191
25	36.5	9.22	127	7.77	26.2	54.2	717	11.4	44.9	113
10.8	18.8	53.3	48.7	33.1	16.7	44.9	604	22.5	66.1	119
23.7	17.6	1.42	173	3	27.6	77	2288	21.9	73.7	271
37.9	28.9	6.15	99.1	22.5	16.7	34.9	813	27.4	115	264
33.4	17.2	25.7	257	49.6	16.4	50.5	965	10.3	33.7	60.4
28.1	30.2	55.7	372	62.1	23.9	39.6	1094	15	54.7	229
20.2	19.1	10.4	16.8	2.17	32.8	57.3	828	29.7	67.3	269
27.9	33.7	31.3	176	77	30	66.1	621	39.2	96.5	115
47.8	42.6	133	259	122	26.9	56.2	649	26.2	57.8	106
36.8	20.2	5.23	89.8	7.7	10.1	47.8	757	18.6	52.3	70.4
27.6	20	12	11.8	1	42.6	67.3	770	23.3	56.2	56.7
99.1	66.1	10.3	10.6	8.13	36.5	95.6	2167	18.4	37.2	79.1
35.9	22.9	25.7	173	50	13.9	35.9	1526	9.06	26.2	36.8
26.9	27.1	1.29	163	25.7	21.9	51.4	866	21.3	54.7	322
18.1	25	25.9	75	15.7	12.5	33.1	717	11.1	27.1	62.1
23.1	24.1	14.1	297	49.6	8.51	37.2	382	11.7	19.3	1.68
66.1	52.8	4	93.1	31.6	10.4	19.8	311	129	184	33.7
16	21.1	19.8	36.8	19.5	18.4	31.9	820	19.6	53.8	75.7
36.5	44.5	8.66	10	15.3	10.9	39.6	621	1.84	8.82	19.5
31.3	17.6	6.26	1.46	7.84	28.4	61	604	22.3	50.5	145
30.2	36.8	54.2	51.9	15	21.9	44.5	491	29.4	71.7	241
28.4	26.2	1.58	163	24.6	17.8	41.4	1286	10.6	46.6	142
35.2	25.7	67.3	604	136	36.2	73	723	20.2	44.9	73
23.7	27.6	45.7	63.8	14.2	16.1	44.5	956	10.7	47.8	91.4
27.4	30.8	7.99	11.3	5.94	15.5	43.3	2308	12.9	34.3	108
47	42.9	9.22	14.2	11.4	12.5	30.2	730	20.5	37.9	93.1
45.3	50	7.43	322	37.5	6.55	30.2	483	8.9	31.3	36.2
35.9	20.4	7.5	82	26.9	15.7	50.9	1611	22.3	55.7	198
33.7	28.4	17.3	125	20.7	14.1	35.9	851	56.7	81.3	23.7
28.4	28.4	7.7	85.8	27.6	31.3	59.4	799	28.9	61.5	89
15.4	18.4	59.9	231	67.9	20.5	49.1	770	41	119	392
78.4	47.4	8.35	54.7	16	28.9	63.2	1055	26.7	59.9	160
25.7	30.5	3.02	47.8	20.4	7.43	21.1	1009	292	410	93.9
18.6	20	9.31	18.3	5.33	13.9	21.5	890	7.1	28.9	43.7
28.1	26.2	7.04	109	23.5	31.6	61	956	31.9	93.1	262
93.9	58.3	42.9	42.6	11.5	40	63.2	604	10.6	29.4	63.8
67.3	55.7	47.8	45.7	18.9	13.3	45.3	991	18.1	37.5	85.8
28.6	23.1	19.8	11.1	13.6	16.8	38.5	890	26.9	53.8	115
74.3	58.8	17.8	316	62.1	14.3	37.5	644	39.2	114	133
22.9	11.4	1.63	496	56.7	19.1	51.9	730	29.4	63.8	149
28.9	29.4	10.9	10.9	4.41	59.9	168	2436	13.6	22.7	43.7
28.9	21.7	52.3	52.3	29.2	30.8	54.2	594	17.8	35.2	65.5
35.5	37.2	33.7	58.3	20.9	16.8	34.3	828	2.31	131	18.6
63.2	54.2	4.66	17.3	3.34	8.35	30.8	1000	47.8	110	209
33.7	35.2	6.1	33.4	10.6	26.9	58.3	1000	10.7	34	44.9
7.04	13.8	16	514	85.8	9.91	37.9	1370	12.7	34	26.9
75.7	58.3	25.5	127	31.3	39.2	69.8	594	1.04	112	4.26
36.2	24.1	10.1	16.7	7.64	16.8	44.9	1582	7.57	73	12.1
46.6	37.5	3.28	87.4	25.3	30	54.7	1911	8.06	26.9	51.9
99.1	110	8.66	9.06	5.83	34	72.3	835	27.6	59.9	103
31.3	19.3	14.7	300	42.9	12.5	31.6	552	9.39	25.3	44.1
82.8	92.2	16.3	311	69.2	42.6	96.5	2371	13.5	27.4	63.8
115	76.4	6.61	18.9	10	42.2	72.3	1094	28.6	61.5	200
74.3	67.9	5.42	12.5	3.52	20.2	55.7	2167	13.1	38.2	58.8
33.7	34.6	23.1	10.6	39.2	31.9	90.6	3820	45.7	126	319
33.1	22.9	6.67	200	18.4	5	32.2	225	297	392	73.7
66.7	48.3	25.5	46.1	11.7	48.3	75.7	922	13.2	37.9	34
29.7	28.9	6.98	23.3	7.57	32.2	75.7	1911	10.5	37.5	40.3
47.8	33.1	4.37	114	21.3	74.3	135	1144	23.5	67.3	122
34	31.3	2.86	113	52.8	44.1	74.3	843	10.1	30.5	82
33.4	26.4	1	615	64.4	11.5	34.6	784	34.6	68.5	87.4
67.3	58.3	8.51	279	61	25.7	52.8	632	34.6	69.2	160
39.2	22.5	51.9	139	51.9	21.9	43.7	991	29.2	63.8	183
28.9	14.9	7.1	10.6	19.3	21.9	51.4	1084	39.2	78.4	94.7
40	26.7	2.81	48.3	1.43	10.8	34.3	1655	63.2	175	352
31.3	20	5.14	16.5	4.22	12.6	30.2	704	11.7	29.4	51.9
63.8	67.3	20.5	72.3	21.7	28.4	54.2	704	7.43	48.7	66.7
17.9	25.9	22.3	4.37	31.9	25	50.5	661	11.8	37.9	85.8
18.9	19.3	7.23	25.5	1	103	316	4958	5.47	27.9	35.9
32.8	26.9	3.08	8.13	3.16	21.1	52.3	750	32.5	64.4	84.3
71.7	52.3	1.93	95.6	32.5	33.1	81.3	2110	54.7	158	297
39.2	34.6	19.8	372	91.4	10.9	29.4	638	39.6	103	209
25.7	23.7	1	257	44.5	6.73	21.1	730	20.5	35.5	40.3
151	115	19.1	31.9	11	41.4	91.4	1685	22.5	63.8	89.8
46.6	42.2	13.7	49.6	8.06	50	79.1	1322	29.7	71.7	127
28.1	22.3	4.1	15.4	6.67	27.9	50	470	10.9	23.5	34.9
43.3	8.43	8.28	21.9	1.55	34.3	54.7	610	34	71	120
33.1	30.2	3	15.7	7.99	27.9	51.4	449	24.8	83.5	276
74.3	69.8	10.1	25.3	4.45	34	73	1037	63.8	198	410
41	25.9	14.5	121	41.4	24.8	46.6	820	13.5	52.3	183
88.2	62.1	57.3	35.2	11.7	13.3	37.5	632	10.5	15.4	29.2
42.9	23.1	3.65	102	20	11.9	38.9	583	7.7	28.9	37.9
33.4	19.6	74.3	55.7	14.2	17.5	37.5	799	38.9	85.8	145
26.7	22.7	8.66	13.7	4.29	103	221	1540	14.1	41.4	49.6
33.4	14.7	13.7	253	35.5	16	34	644	14.6	32.2	60.4
47	45.3	3.31	96.5	4.07	55.7	102	1094	23.3	50	57.3
85.1	44.9	6.85	12.3	10.7	52.8	178	1407	12.5	26.2	28.9
25.5	25	66.7	248	77	20.9	44.1	538	4.78	27.6	39.6
25	21.5	37.5	133	81.3	25.7	50.9	784	12.4	12.7	20.5
35.9	37.2	9.06	9.22	9.73	38.9	67.3	791	20.7	54.7	68.5
99.1	53.3	7.43	14.5	8.06	11.9	31.6	820	9.82	19.1	44.1
54.7	17.3	6.49	17.6	18.1	29.2	66.7	1046	18.9	33.1	80.6
85.8	60.4	5.19	8.28	1	30	48.3	599	7.77	32.5	25.3
24.4	16.7	25.7	150	35.9	6.55	20	449	8.66	29.7	53.8
20.2	23.7	9.47	14.1	14.1	12.5	50	890	48.7	124	308
111	89.8	2.67	97.3	27.6	40.3	78.4	1346	20.7	38.5	58.3
26.2	12.4	7.23	106	30.5	41.4	68.5	851	9.06	19.3	22.5
21.9	30.2	28.6	313	62.1	11.2	41.8	835	11.4	31.9	15
54.7	55.7	8.51	16.7	2.41	49.6	66.7	316	30	58.3	92.2
56.2	53.8	3.19	407	51.4	48.3	89.8	1540	14.3	41	38.5
95.6	44.1	18.3	322	73.7	18.8	38.5	1860	3.19	24.4	47.8
70.4	60.4	5.99	267	31.9	118	264	6208	28.1	64.9	107
20.7	22.9	20.2	41	13	57.8	93.9	991	17	38.9	189
27.1	18.1	7.23	61	21.1	17.9	49.6	1124	8.66	20.7	39.6
36.8	13.9	12.4	15.8	3.28	11.7	36.2	509	15.5	28.6	49.1
32.5	25.7	6.26	368	57.3	16.8	35.9	770	36.8	96.5	183
85.8	73	10.4	193	38.2	44.1	77	799	11.3	20.7	31.9
46.1	42.2	1.98	685	67.9	28.9	55.7	1554	14.5	26.7	38.5
33.1	37.9	20	34.9	3.49	9.14	31.3	777	35.2	82.8	215
160	114	5.57	43.3	36.8	12.4	37.5	604	26.7	55.7	61.5
32.2	40.3	48.3	50.5	46.6	16.5	35.9	491	13.3	27.9	60.4
32.2	25.7	5.57	94.7	24.6	12.4	38.2	1420	31.9	227	30.8
31.6	30.5	58.3	153	67.9	14.7	36.5	418	10.3	38.9	38.2
22.1	16.7	2.33	239	32.8	49.6	71	757	12.6	38.9	50.9
33.1	25.3	34	48.7	33.7	24.1	46.1	843	24.1	53.8	71
69.8	55.7	5.09	58.3	19.6	28.1	69.2	2371	19.6	40.7	73
30.8	31.3	4.18	95.6	23.5	30.5	57.3	820	12.9	21.1	22.7
20.9	27.1	8.9	14.3	12	10.7	36.2	730	8.82	20.2	36.2
35.2	34.6	10.5	13.7	3.43	12.6	26.2	1000	33.7	94.7	359
54.7	47	1	231	15.5	38.5	67.3	737	30.2	77.7	137
30	25	9.39	9.65	4.49	13.6	51.4	939	12.3	46.1	31.6
101	82	7.64	141	19.3	13.5	35.9	1055	12.1	27.6	39.6
27.6	12.5	9.14	14.5	18.8	12.7	33.1	1055	19.6	47.4	83.5
25.3	12.7	12.6	12.3	5.88	30.2	44.5	704	13.6	36.5	53.8
38.2	21.9	6.32	10.7	23.5	50.9	82	1526	12.9	30.5	48.3
62.6	47.4	3.52	12.3	21.7	25.5	57.8	874	13.3	31.9	38.9
56.7	57.8	1.61	626	63.8	17.8	32.5	599	32.2	117	150
121	125	11.4	7.37	4.91	11.4	25.3	704	28.1	73	6.61
25.5	20	16.7	297	94.7	23.1	65.5	1298	13.3	22.5	41.8
28.6	30.5	6.32	11.2	10.7	59.4	90.6	717	13.5	28.6	48.3
30.2	20.9	2.35	90.6	15.5	29.7	61.5	882	16.7	50.9	119
36.8	17.8	57.8	46.1	23.9	26.7	66.1	965	25	70.4	99.1
41	40.3	9.91	17.8	34	30.8	70.4	3134	10	36.5	68.5
75	56.7	11.2	17.5	16.7	17.6	46.1	835	11	31.6	45.3
21.9	25.7	11.2	66.7	20.9	81.3	200	6793	28.6	56.2	66.1
59.4	36.5	3.43	85.1	8.66	10.2	35.5	1472	11	48.3	42.6
38.5	29.7	52.3	43.3	14.5	34.3	64.4	750	7.99	25.9	44.5
64.4	51.9	4.7	355	45.3	15.5	42.6	692	29.2	57.3	78.4
35.9	30.8	21.7	87.4	50.9	127	316	6043	16.5	41.8	44.9
42.9	24.4	5.57	86.6	16.8	22.7	53.8	1433	22.9	55.7	79.9
27.1	20.4	5.57	11.1	8.98	40.7	66.7	692	9.14	23.9	41.4
28.1	38.9	7.5	15.5	4.41	15	25.7	820	67.9	110	4.57
26.7	23.9	7.04	8.06	38.9	9.31	30.2	750	18.3	50.9	175
28.4	27.6	26.2	34.9	20.5	8.74	33.7	784	37.2	74.3	142
34	21.7	50.5	246	97.3	19.5	47.8	1322	33.7	89.8	112
44.5	24.6	16.7	31.1	29.2	58.8	75	1104	13.7	37.2	52.8
113	110	5.42	15.4	6.04	50.9	82.8	1000	13.9	27.4	82
54.7	53.8	48.7	186	59.4	18.6	45.3	667	12.1	20.9	38.5
205	121	3.13	528	39.6	42.2	61.5	673	36.8	83.5	237
160	100	11.1	13.1	14.3	36.5	54.7	578	12.7	34.6	51.4
28.4	21.9	24.1	96.5	53.8	17.5	37.9	1241	16.7	50.9	55.7
94.7	69.2	1.23	149	25.5	16.5	63.2	770	8.74	34	63.8
34.3	25	1.83	92.2	20.9	21.7	48.3	777	9.47	25.7	36.2
61.5	44.9	4.45	20.2	14.7	10.8	26.4	692	7.91	30	34.6
31.1	19.1	7.91	6.98	22.5	34	58.3	667	22.7	62.1	154
41.4	29.4	17.6	28.4	13.1	34.6	58.3	655	33.4	85.1	407
32.2	26.9	1.88	142	7.99	9.39	22.9	710	13.7	33.4	58.8
25.9	24.6	41	38.9	8.43	8.2	30	1526	14.2	30	46.6
24.8	22.1	5.38	108	15.4	5.09	26.7	914	23.3	50.9	77
71	51.9	13.1	25.7	8.98	6.67	27.1	1018	21.5	50.5	147
27.4	24.4	37.9	181	40.3	27.6	62.6	2350	8.2	125	6.04
27.9	29.7	56.7	34	19.8	34.6	57.3	866	14.3	34.6	56.7
137	109	5.05	12.1	10.6	7.99	21.7	528	14.2	34	36.2
138	75	11	121	32.8	28.4	55.2	692	17.5	48.7	49.6
158	98.2	28.9	50.5	2.44	44.9	122	3460	20.2	44.5	70.4
26.2	28.4	75.7	418	123	25.5	45.3	956	12.9	51.4	146
32.5	29.4	8.9	33.7	17.9	34	66.7	723	14.1	40.3	51.4
82	57.8	29.4	85.1	24.1	14.5	31.9	730	31.6	81.3	155
91.4	14.2	6.32	16.7	4.45	24.6	39.6	898	43.3	90.6	181
54.2	50.9	7.17	122	20.9	44.5	90.6	2129	55.7	141	143
31.3	17.5	12.3	478	106	33.7	63.2	914	8.82	28.9	101
48.7	26.7	2.29	621	85.1	11.2	26.4	931	14.9	51.9	55.7
89	61	6.92	11.2	9.91	15	42.2	770	13.9	33.1	43.7
34	28.4	63.2	41	34.9	24.6	53.3	890	15.8	42.6	56.7
24.6	17.3	8.35	13.5	3.59	55.2	84.3	770	13.6	37.2	42.6
103	67.3	3.28	53.8	32.8	22.5	50	621	15.4	44.5	44.1
47	44.9	6.38	14.9	5.38	6.85	44.9	56.2	14.6	40	38.2
31.1	24.8	9.14	18.8	2.57	10.6	25.5	1124	9.31	29.7	35.5
51.4	37.5	5.14	56.7	9.14	37.5	47.8	717	18.8	55.2	211
25	21.5	13.5	44.1	12.7	49.1	84.3	1230	14.5	45.7	36.8
27.4	28.1	1.78	164	19.5	21.5	51.4	743	12.3	27.1	47
48.7	40.7	8.9	56.7	9.06	19.3	39.6	939	13.3	25.7	47.4
168	172	19.5	183	33.4	32.8	51.4	426	11.7	30.5	35.2
32.8	16.4	25.9	34.9	30.2	2.92	38.2	4.87	16.8	40.7	61
35.5	28.6	11.2	15	12.4	21.5	51.9	588	23.7	48.7	67.3
25.5	21.7	50.9	61.5	29.2	8.98	17.6	813	14.9	35.2	64.4
29.2	30.8	24.4	102	36.5	17.3	43.7	890	13.2	35.2	96.5
106	96.5	19.6	209	16.1	16.4	38.5	799	17	24.8	22.7
28.1	29.7	15.5	99.1	63.2	31.9	79.1	1094	21.3	58.3	184
42.2	56.2	8.82	24.4	1.01	26.2	57.3	567	25.9	63.2	114
32.2	20.9	11.1	175	14.5	36.5	55.2	433	13.7	27.9	30.5
59.9	34.3	17.6	3.4	12	40.3	83.5	1018	9.39	35.2	53.8
23.7	22.5	7.57	189	33.7	29.2	59.9	649	8.06	35.9	53.8
36.5	28.1	6.32	16	6.98	16.7	33.1	626	11.4	42.9	79.1
57.8	42.2	7.84	12.2	8.98	11.2	34.3	737	9.14	38.9	51.9
102	96.5	8.06	25.7	11	16.4	39.6	422	16.4	47.8	126
21.1	19.8	14.3	195	18.8	55.2	117	2414	16.1	45.3	56.7
30	24.6	16.4	150	40.3	17	42.2	784	25.9	55.2	71.7
126	165	12.5	11.9	20.7	33.7	54.2	973	12	41	47.4
33.4	37.9	1.89	115	22.1	17.9	39.2	764	11.4	28.4	38.2
36.8	33.4	7.99	20.7	1.15	21.5	57.8	770	23.5	81.3	137
27.6	33.7	59.4	615	109	69.2	111	1027	15.4	27.9	1.06
34.3	27.9	25.7	175	36.5	11.2	35.2	562	15.4	45.3	54.2
15.3	20.9	13.9	12	11.9	13.8	32.5	843	13.3	40	49.6
33.1	34.9	10.9	16.4	4.57	15.7	50.5	2167	16.5	28.6	38.2
55.7	53.3	57.8	248	95.6	8.51	26.7	474	29.4	73.7	85.1
22.1	24.6	8.2	253	35.5	35.2	68.5	835	20.4	42.9	75.7
25	18.9	11.2	219	58.8	16.8	51.9	737	6.32	32.2	52.3
59.9	51.9	19.8	45.7	20.7	20.9	43.7	679	14.2	40.3	48.7
34	20.9	12.3	75	20.9	16.1	34.6	835	9.14	32.8	48.7
167	127	6.15	15.8	10.4	6.98	31.3	922	13.9	32.2	111
64.9	11.5	4.57	346	53.3	15	39.2	784	12.6	35.2	26.9
69.8	59.9	3.62	175	40	11.2	38.5	685	16.8	47.4	71
67.3	54.2	11.4	18.6	4.41	13.8	38.2	649	17.5	34.3	83.5
30.5	25.5	33.1	23.1	26.9	10.1	30.5	784	15.3	28.6	57.3
31.3	27.9	2.62	83.5	34	15.4	37.2	528	23.1	53.8	81.3
89.8	61.5	26.7	289	97.3	7.17	25	379	13.5	32.8	70.4
71.7	52.3	22.9	392	63.2	20.9	33.4	547	17.8	47	167
22.7	23.7	4.91	113	5.62	11.5	27.6	509	15.4	30.8	55.7
89.8	85.8	2.97	107	17	22.7	84.3	2072	17.2	58.8	82.8
43.3	30.5	45.3	35.5	11.4	45.3	74.3	1382	12.5	16.3	63.2
69.2	53.3	4.91	213	41.4	64.9	149	3718	17.8	77.7	90.6
35.9	19.1	4.53	362	52.8	13.2	31.9	730	13.7	38.9	60.4
35.2	20.2	10.4	13.8	12.9	22.9	51.9	599	10.2	40.3	38.9
31.1	27.4	9.65	12.1	12	18.9	42.2	679	12	37.9	50
23.9	29.7	81.3	63.2	27.4	15.4	59.4	1165	16.5	23.3	31.9
71	69.8	32.5	29.4	5.78	15.8	46.1	1762	12.4	39.6	36.2
69.2	66.1	12.5	106	18.8	25.7	53.8	730	21.9	57.8	241
44.5	47	6.73	14.6	1	12.9	39.6	457	11.2	28.4	67.3
28.1	26.7	51.4	46.1	14.9	10.3	34.3	1155	14.7	34.6	51.9
96.5	53.8	18.6	219	98.2	32.2	62.1	730	16.5	54.2	64.4
147	123	8.2	18.6	2.29	15.3	32.2	820	16.5	40.7	58.8
34.3	15.8	34.6	302	82	36.5	75.7	750	11.8	21.1	34
20.2	17.8	10.7	403	55.2	20	40.7	644	11.1	24.1	31.9
40.7	25.5	1.95	453	67.3	8.2	26.2	1084	16.5	43.7	45.7
154	85.8	33.4	25.7	13.5	6.38	33.4	898	24.6	61	132
81.3	77.7	4.66	50.5	12.5	13.9	41.4	1055	20.2	44.1	13
27.6	23.9	1.06	75	18.9	12.2	42.6	1459	16.5	51.4	157
30.2	25	11.9	22.5	11.5	14.6	28.1	661	20	62.1	94.7
33.4	26.9	11.9	145	29.4	22.7	49.6	965	27.1	59.4	149
176	130	47	43.7	19.6	15.8	39.6	655	9.14	32.8	72.3
91.4	71	5.99	9.14	1.24	42.2	60.4	704	16	48.3	149
26.9	23.7	132	1065	276	33.7	65.5	717	12.5	31.1	35.5
86.6	77.7	34.9	25.9	23.5	45.3	82.8	1928	20.2	56.2	111
27.1	22.5	5.38	10.1	8.9	25	43.3	588	27.6	61	88.2
20.4	24.6	13.7	98.2	9.14	26.4	50.5	866	31.3	75.7	289
86.6	73.7	8.58	107	34.3	73.7	137	1640	12.4	33.1	55.2
25	19.1	12.2	50	12.6	40.7	76.4	743	11.5	24.6	52.8
34.6	19.1	87.4	229	73	9.06	35.2	1000	21.3	45.7	107
26.7	16	26.7	200	22.9	94.7	284	4032	16.8	52.8	69.8
175	259	11.4	18.9	4.18	10.7	25.3	806	15.7	41.8	163
69.8	53.8	10.6	11.1	1.27	9.22	24.6	704	20.9	50.5	100
35.2	26.4	1.83	79.1	18.8	20.9	41.4	578	23.7	69.8	82
11.4	40.7	15.7	24.4	11.1	9.22	42.2	1554	23.3	51.9	79.9
104	65.5	7.84	76.4	7.37	69.8	164	1843	2.92	74.3	2.79
25.7	17.5	1	231	43.7	28.6	59.9	685	14.3	33.4	66.1
47	30.2	9.31	205	19.3	22.1	59.4	1420	12.6	34.3	40.7
35.2	22.1	1.75	103	8.2	53.3	96.5	1186	12.7	32.5	54.2
63.8	48.7	3.28	119	17.6	11.9	42.6	828	5.83	23.5	22.1
30.8	18.1	9.82	16.4	8.2	14.7	47	621	11.7	28.1	22.9
73.7	20.2	19.6	437	69.2	14.5	37.5	791	13.8	29.7	36.8
69.8	67.3	3.62	99.1	28.6	12.6	35.2	649	21.1	43.7	63.8
117	78.4	31.9	78.4	20.4	40.3	73.7	692	12.1	27.6	71
37.5	28.6	1	146	11.8	19.6	40	730	30.5	71.7	143
87.4	23.3	5.94	57.3	16.8	112	219	2414	16	46.6	46.1
23.7	16	3.92	21.7	3.79	35.5	62.6	743	6.38	11.4	2.69
44.5	42.2	21.7	127	36.8	137	334	4870	5.42	18.8	3.72
28.9	34	7.84	12.7	5.73	20.9	59.9	610	21.1	44.5	69.8
25.7	30.2	4.18	23.1	9.22	22.3	45.7	757	23.9	55.2	84.3
31.3	34.9	13.6	12.4	19.1	14.6	36.2	698	99.1	133	38.5
36.8	22.5	2.59	62.1	9.22	7.99	21.7	685	9.82	28.4	45.3
32.5	20	77.7	784	138	32.2	57.3	542	6.98	37.5	6.67
32.8	28.4	15.8	2.5	21.9	33.7	48.7	491	6.98	22.3	51.4
141	137	3.19	79.1	1.42	25.7	50.9	667	25.9	63.2	88.2
61.5	49.6	1.11	132	25.5	30.2	45.7	594	15	41	80.6
50	28.1	14.7	95.6	25.5	12.5	29.2	1322	13.6	33.1	48.7
27.4	28.6	6.44	109	20.5	20	55.2	1568	13.3	36.5	51.9
21.1	19.5	13.1	20.9	1	14.6	31.1	898	26.9	49.6	6.32
26.7	25.9	50.5	667	136	31.9	60.4	799	42.9	114	281
27.4	35.9	2.92	103	40.7	55.2	103	1124	14.9	57.8	215
248	211	7.17	11.8	13.7	42.9	73.7	1027	14.2	37.2	52.8
26.2	30.2	77	44.5	20	17.8	50.9	583	12.3	37.5	31.6
69.2	63.2	55.7	67.9	18.9	27.1	78.4	2035	18.6	49.1	68.5
101	71.7	6.38	11.3	8.74	33.7	51.9	698	18.3	35.2	50
37.9	15	8.98	41.4	11.5	23.7	38.2	514	13.9	37.9	96.5
72.3	53.8	9.56	7.37	1	89	188	1526	10.2	23.9	35.5
34	25	4.29	142	34.3	1165	3051	523	12.1	33.7	47
37.9	29.4	18.8	19.6	10.1	11.5	28.6	445	14.6	42.9	57.8
7.57	7.57	16.4	221	92.2	22.1	52.3	770	23.3	53.8	120
30.8	21.9	7.5	26.7	17.3	41.4	100	2091	34.3	125	264
80.6	63.8	3.96	135	26.4	32.8	53.3	626	22.9	49.6	58.8
34.6	28.1	12	37.2	20.5	13.1	54.2	1197	9.56	29.2	29.4
33.1	29.4	20.4	106	47.4	45.3	75	632	13.9	45.7	54.2
47.4	47	57.3	53.8	22.7	16.3	40	538	16	26.2	58.3
34	35.5	6.67	7.91	13.2	38.5	105	3191	8.06	32.8	44.9
95.6	73	11.5	126	20.2	14.6	43.7	588	6.92	21.1	56.7
38.9	29.2	11.4	340	77.7	26.4	67.3	1640	10.5	29.7	42.6
60.4	51.4	6.44	15	6.85	43.3	76.4	1065	26.4	79.9	119
55.7	47.8	4.03	17.8	16.8	41.8	105	1596	15.8	24.1	3.25
17.6	17	14.6	163	19.6	35.9	64.4	882	16.8	35.9	46.1
25.3	31.6	1.38	50.9	3.13	19.1	50	673	10.8	21.1	22.3
66.7	63.8	10.6	207	54.7	13.6	35.9	770	17.2	36.5	77.7
28.1	19.8	5.78	13.2	3.08	15.7	31.3	557	14.7	41	66.1
29.4	32.5	16.1	84.3	39.6	11.1	42.6	594	11.2	28.4	45.7
35.5	31.1	2.94	221	16.7	56.7	131	3652	34	93.1	142
47	26.4	16.7	42.2	38.2	6.61	40.7	882	14.5	50.5	143
48.3	50.9	28.4	21.9	16.3	16.5	48.7	866	16.4	43.7	64.9
43.3	20.5	23.7	28.9	14.7	14.5	49.6	1946	14.3	32.2	46.6
33.1	17	4.26	12.3	1	17	49.1	851	18.8	59.9	147
29.2	21.5	13.5	19.3	17.3	26.4	61	858	11.3	31.6	58.3
27.4	22.7	6.98	47.8	12.2	21.1	43.7	1084	21.5	57.8	89
31.6	29.7	18.6	102	17.9	17.6	47.8	1596	23.7	50	85.8
44.1	36.2	5.09	44.1	52.3	33.1	71	437	9.91	35.9	31.9
34.9	31.6	10.4	22.9	8.2	23.1	47.4	528	35.2	82.8	110
22.7	29.4	8.66	8.2	18.4	18.8	56.7	914	13.6	29.4	41.8
154	163	7.04	165	38.9	53.3	81.3	667	7.43	41	37.5
135	104	40.7	567	73.7	16.3	41.8	874	11	24.1	36.2
143	126	15.3	35.9	16.3	36.8	68.5	757	15.1	35.9	41
53.3	46.6	26.4	42.2	12.1	36.2	59.4	632	12.7	28.9	52.3
34.6	31.6	51.9	219	85.8	16.7	40	806	9.14	30.2	17.6
77	74.3	1	135	8.98	41	78.4	939	10.8	26.9	55.2
31.3	25.9	21.9	5.83	17	8.66	12	163	13.1	22.3	37.5
231	165	10.1	15.1	3.37	22.9	47	441	39.2	138	449
96.5	86.6	9.82	175	74.3	9.47	32.5	866	20.2	55.2	72.3
96.5	85.8	18.9	5.19	31.6	38.2	61.5	632	7.57	24.1	33.7
27.9	29.4	44.5	89.8	10.1	32.2	60.4	557	13	39.2	64.4
219	136	14.9	250	53.3	26.2	41.4	717	23.7	59.4	111
31.3	24.1	6.38	14.6	10.3	12.5	34	632	41.8	129	359
79.1	65.5	4.74	164	57.8	15.1	31.9	730	9.73	27.6	44.5
23.1	21.9	11.7	11.8	4.96	20.5	38.9	931	16.3	44.9	66.1
50.9	37.5	51.4	99.1	82.8	16.1	44.5	1670	23.1	65.5	163
42.6	32.8	10.9	14.9	6.67	41	73	649	11.9	32.2	34.6
115	90.6	17	24.1	6.67	11.4	44.1	626	29.2	50.9	4.37
46.6	46.6	5.73	13.1	1	17.6	42.9	698	13.3	45.3	59.9
96.5	72.3	7.3	9.73	3.62	20.5	40.7	478	12.1	24.8	64.9
66.1	58.3	30	129	50.5	38.2	84.3	1794	12.6	35.9	51.4
34.6	16	31.1	311	67.9	53.8	77.7	1065	8.35	29.4	37.5
81.3	63.2	30	400	85.1	9.31	22.7	594	10.5	40	56.7
47	35.5	16.5	129	41.4	9.22	20	1000	18.4	49.1	91.4
23.9	11.4	30	50.9	16.7	27.6	58.8	906	8.28	29.7	33.7
33.4	34.9	9.47	10.3	8.35	11.5	26.9	1778	9.31	21.9	58.8
146	114	7.37	19.3	4.22	45.3	106	3162	19.3	66.1	176
21.5	27.1	16.1	198	27.4	4.78	4.33	81.3	9.06	35.2	38.2
29.2	28.9	31.6	111	23.9	16.1	38.2	491	29.2	100	164
35.5	29.2	6.85	112	19.3	11.3	31.1	843	13.1	24.4	37.9
38.2	30.5	13.9	392	93.1	70.4	111	1094	17.3	50	50.5
20.2	18.1	3.52	75.7	23.7	22.1	51.4	673	10.8	26.9	64.9
18.9	19.3	4.7	474	52.8	11.2	32.8	578	19.1	67.3	85.8
57.8	61	22.1	95.6	50	29.7	46.6	1827	14.6	34.3	73
33.1	21.7	73.7	334	100	16.7	39.2	692	14.7	29.7	46.1
60.4	41.8	7.99	32.8	11.9	36.8	66.7	843	17.6	30.2	53.3
51.9	53.8	38.9	32.8	9.39	2.64	6.15	229	12	24.4	31.1
65.5	46.1	11.3	145	21.1	16.5	43.3	1715	7.17	30.5	40.3
36.8	35.9	9.56	257	36.8	13.9	37.5	1114	14.9	40	50.5
50.9	44.1	4.26	143	23.9	21.9	49.1	509	36.2	113	271
44.1	33.1	1.91	97.3	23.3	86.6	160	1395	16.8	42.6	37.9
44.1	40.3	71	64.4	44.5	28.6	59.4	685	12.5	33.1	36.5
27.4	29.7	10.6	32.8	8.43	12.2	49.6	1700	15.5	54.7	138
39.2	36.8	13.5	78.4	39.6	16	42.6	882	25	58.3	189
32.5	31.6	42.6	217	57.3	36.8	70.4	828	10.6	34	55.2
153	82	2.71	133	33.7	74.3	117	1395	17.2	50.5	61.5
147	123	9.56	14.2	6.61	20.5	56.2	939	11.2	31.3	51.4
164	103	20.2	17	22.7	39.6	64.4	1208	13	34.6	77
90.6	78.4	1	136	22.3	4.83	7.5	145	20.5	59.9	195
33.7	41.4	7.77	13.5	3.05	16	48.3	1104	10.6	21.9	62.1
100	136	4.83	122	11.1	14.7	47	1981	9.22	22.7	42.6
41	20.9	12.1	58.8	29.4	7.84	20.5	453	9.91	25.5	42.6
33.7	31.9	8.2	19.5	2.31	17.3	36.5	410	9.82	27.4	40
29.2	31.3	28.4	72.3	16.7	50.5	80.6	483	1	78.4	10.8
36.2	36.2	7.23	15.7	3.22	46.1	75.7	1275	14.6	43.7	31.1
39.2	18.3	4.78	382	75.7	36.5	77.7	2890	14.1	24.4	35.5
29.7	24.8	25.9	289	45.7	8.82	27.9	466	8.98	28.6	58.3
23.7	21.3	5.47	74.3	21.1	38.5	79.1	973	11.7	37.9	50
331	213	2.15	183	18.8	42.6	82.8	991	17.5	49.1	55.7
36.2	26.9	2.46	205	20.9	34.9	64.4	764	24.8	70.4	161
79.1	70.4	4	141	11.8	31.9	70.4	710	10.3	30	41.8
63.8	67.3	8.74	13.2	11.8	31.1	56.7	799	33.4	74.3	149
36.5	27.6	15.8	178	54.7	73.7	124	1472	22.7	51.4	213
80.6	65.5	2.59	73	44.9	36.2	71.7	858	9.65	24.8	56.2
45.3	12.4	7.77	186	38.9	30.8	69.8	1084	16.4	45.7	165
70.4	57.8	13.6	64.9	14.6	17.3	36.2	514	11.9	29.4	46.6
30.8	20.4	16.5	29.7	1	60.4	100	757	16	39.2	69.2
24.8	22.5	12.3	34.9	11.4	7.5	24.8	799	17.9	59.9	93.9
30.8	26.2	39.2	615	89	7.7	18.3	820	17	24.4	12.6
63.8	59.9	13.1	160	28.6	41.8	63.8	882	14.6	31.6	78.4
35.2	21.9	14.5	19.1	9.39	15.1	33.7	599	38.5	82.8	132
3.28	2.97	25.9	205	80.6	8.35	32.8	890	11.1	31.9	38.9
51.9	20.9	2.19	93.1	13.1	40.3	81.3	858	13	23.7	41
27.4	17.8	40.3	379	82	32.2	59.9	717	7.91	28.9	31.9
39.2	34	4.29	23.7	17.6	28.9	69.2	828	14.7	32.8	53.8
8.74	12.3	7.84	22.9	13.6	9.56	30.8	1433	12.1	35.5	53.8
34.9	31.6	3.16	100	22.9	97.3	211	2480	17.3	53.8	175
191	119	1.79	107	14.9	16.4	48.3	1322	16.5	32.2	111
28.1	42.6	7.04	7.7	5.78	35.5	63.8	1046	17.6	54.7	58.8
40	38.5	20	88.2	55.2	14.5	39.6	906	27.9	62.6	191
66.1	48.3	1.93	385	38.5	27.4	58.3	730	17.6	45.7	59.9
28.4	15.1	4.1	85.1	19.8	14.6	55.2	1999	10.1	24.4	57.3
64.9	50.5	6.21	77	25.7	18.6	41	843	16.7	47.8	67.9
26.9	27.9	9.65	62.6	10.4	5.99	14.9	178	11.1	34.6	47.8
31.9	20.7	4.74	102	23.1	43.7	73.7	777	22.1	41.4	77.7
38.2	16.3	12.2	24.4	10	41.4	72.3	698	25.7	73	87.4
29.2	23.7	34.3	114	32.8	13.5	36.5	770	12.4	35.9	40.3
31.1	42.6	27.9	281	88.2	50.9	99.1	1843	17.8	37.5	66.7
29.2	24.6	8.82	17.6	14.7	34.3	77	1894	12	31.3	96.5
84.3	68.5	2.37	340	36.2	9.56	24.6	588	10.2	18.4	30.5
31.3	18.8	44.1	22.1	13.1	13.5	31.1	610	5.14	13.8	5.52
50.5	42.6	13.2	244	55.7	34.9	74.3	1124	14.3	42.2	54.7
58.3	59.4	12.6	19.6	20.2	32.8	63.8	604	4.91	167	5.67
50.9	34.9	8.51	106	10.9	48.7	75.7	965	19.3	30.2	53.3
108	71.7	7.23	13.8	11.4	34.6	68.5	567	13.6	48.3	121
59.9	58.3	11.8	26.9	4.61	44.9	77.7	514	9.56	25.3	60.4
47.4	41.4	5.28	113	9.73	6.92	22.1	784	14.2	46.1	96.5
33.1	37.9	15	281	69.8	47.4	77.7	698	17.8	48.3	235
27.6	24.6	26.4	51.9	1.47	9.91	28.9	1065	9.73	13	41
43.3	41	4.61	77.7	20	30.5	58.3	1700	9.14	23.9	47.4
146	143	12.5	9.82	4.18	42.6	82.8	973	38.2	85.8	129
62.1	59.4	11.8	93.9	45.7	20	46.6	483	13.9	35.9	37.5
37.9	41.4	8.28	16	1.68	17.8	40	820	8.98	25.3	58.8
20.7	22.1	14.2	147	35.9	20	44.9	594	16.8	36.8	89.8
74.3	63.8	6.67	5.42	19.5	11.5	25.5	667	12.7	39.2	54.7
32.8	28.6	4.83	102	21.5	35.2	101	2288	10.1	30.5	75
62.6	44.9	65.5	66.7	20.9	20.5	45.3	813	47.4	89	163
17	28.9	77.7	67.3	15	19.6	55.2	1911	12.2	36.8	50.5
105	72.3	9.14	221	41.4	24.4	47	692	8.82	26.4	39.6
32.2	21.1	15.4	110	32.5	15.5	41.4	828	37.9	82.8	110
25.9	29.2	42.2	161	55.2	48.3	75	890	4.41	8.82	8.82
51.9	38.2	8.51	1.39	13.1	15.1	43.7	710	10.6	25.3	47.4
155	121	7.43	14.5	1	38.2	75.7	698	16.5	35.5	31.3
79.1	20.2	5.78	157	24.6	15.8	36.5	1134	19.1	35.9	62.1
104	108	5.57	114	17.6	13.2	43.7	1582	6.85	17.6	70.4
65.5	42.9	6.15	44.5	3.05	26.7	62.6	799	14.6	36.8	37.2
36.2	19.1	28.1	40.7	13.3	19.8	43.3	866	17.2	34.9	75
104	59.4	37.2	41	11.5	40	68.5	1241	5.67	36.2	42.9
94.7	76.4	47.4	57.3	16.5	27.6	54.7	922	21.3	44.5	96.5
82	56.2	30.8	48.7	21.1	72.3	229	5003	10.7	19.3	37.5
25	29.7	1.72	104	11.9	29.7	59.9	1219	12.6	42.2	82
27.9	20.2	19.1	418	96.5	25.3	58.8	1640	18.3	40	88.2
24.1	34	5.38	15.4	3.11	34	64.4	1252	14.5	23.3	56.2
41	25.9	24.8	16.7	13.1	29.4	69.2	667	39.6	82.8	137
50.5	42.6	38.9	34.9	15.1	15.1	44.1	2329	13.3	40.3	59.4
29.7	21.9	21.3	235	71	18.9	36.5	594	10.9	24.8	51.9
27.9	25.7	3.92	355	44.9	80.6	157	1611	28.1	73	99.1
29.4	27.1	8.66	11.2	4.33	107	154	644	12.7	32.5	50.9
32.2	34.6	2.62	28.9	3.89	6.55	23.7	127	13.2	33.4	43.3
77	55.7	17.2	30.5	14.6	17	50.9	1554	10.6	32.2	52.8
106	59.4	4.49	147	25.9	19.1	62.6	2267	8.82	23.7	41.8
79.9	40.7	13.2	117	50.5	15.3	51.9	1963	9.65	25.7	82.8
26.4	16.1	7.64	12.9	7.91	33.4	68.5	874	31.3	72.3	137
35.9	35.9	6.79	12.1	6.04	9.39	22.7	337	15	25.9	56.7
78.4	58.3	19.1	44.9	16.4	41.4	65.5	661	19.3	55.7	213
60.4	52.8	3.75	372	67.9	10.6	44.1	1114	10.7	23.7	61.5
58.8	72.3	4.29	12.7	1.26	21.9	53.3	1065	15.1	39.6	69.2
35.2	25	39.6	38.9	49.6	30.2	67.3	882	23.9	83.5	209
21.1	36.8	8.28	106	36.8	6.79	33.7	956	10.9	26.9	17.3
69.8	62.6	20.5	200	29.7	14.7	54.2	685	12	17.6	31.6
50.5	58.3	10.6	16.7	10.5	36.5	57.8	1134	11.7	40.3	64.4
44.5	37.5	14.3	204	57.3	40.3	70.4	1794	15.4	25.5	34.9
32.2	12.9	20.9	26.2	11.1	16	36.8	791	14.3	31.9	39.6
96.5	90.6	11.4	14.5	11.5	10.7	34.6	655	18.8	40.3	59.4
25	31.1	11.1	17.9	16.1	22.3	45.7	457	12.7	32.8	63.2
43.3	34.3	4.87	12	1.01	64.9	188	3854	68.5	225	461
31.1	19.1	30	30.2	25.5	9.14	16.3	259	11.2	26.9	64.4
27.9	18.3	12.4	433	100	11.2	34.9	1144	27.1	66.7	167
30.8	23.1	22.3	42.6	26.9	23.5	37.2	557	7.57	26.7	56.7
22.5	22.9	3.28	75.7	12.6	8.13	50.9	552	17.3	43.7	141
30.5	22.9	57.8	661	184	37.5	66.7	649	13.1	33.4	66.7
20.7	22.9	7.37	115	58.8	17.6	41.8	973	2.69	49.6	8.66
84.3	81.3	9.56	10.4	6.67	24.1	52.8	866	12.2	43.3	137
67.9	56.2	4.1	118	17.9	29.4	62.1	1000	10.5	27.6	33.1
29.2	18.6	17	61.5	51.9	29.4	56.7	644	13.8	35.2	40.3
28.1	17.8	8.43	8.9	10.7	89	163	698	17	50.9	41.8
13.6	10	10.2	13.7	9.65	28.4	51.4	906	8.51	27.6	45.7
41.4	15.3	9.91	5.52	12.5	32.8	70.4	784	8.06	25.7	32.8
25.9	16.7	76.4	403	71.7	15.1	34	655	13.2	35.9	57.8
28.1	18.6	82	46.6	31.1	12.9	39.2	1407	12	23.3	65.5
35.9	30.5	12	165	12.1	8.13	15.1	305	14.6	34.6	52.8
19.6	24.4	27.4	200	64.9	13.9	36.5	588	15	41	47.4
33.7	20.5	5.52	12.5	5.78	15	34	906	11.9	32.5	64.9
151	108	6.26	7.64	10.8	44.1	83.5	750	1.68	111	10.4
26.2	20.9	51.4	63.8	20	31.6	54.2	542	14.3	31.9	70.4
22.9	19.5	24.6	138	35.2	9.82	33.1	784	12.7	30	58.3
137	79.9	22.7	365	39.2	21.5	56.2	1009	9.22	36.8	46.1
83.5	85.1	12.4	407	82.8	36.2	66.1	692	32.2	92.2	195
22.1	19.1	18.6	281	76.4	13	36.8	685	13.9	36.8	117
32.5	28.9	13.6	14.6	3.82	32.2	68.5	799	14.9	44.9	104
23.1	26.9	9.65	48.3	23.3	26.7	44.9	528	11.8	13.2	3.82
221	164	31.9	37.2	23.3	33.7	90.6	2666	20	58.3	60.4
48.3	48.7	2.37	52.8	18.6	56.7	113	2091	9.06	26.7	42.9
40.3	26.7	6.21	122	13.1	16.1	52.3	2148	20.9	89	98.2
26.2	23.1	4.74	141	29.4	157	449	7432	9.56	25.3	41.4
62.6	61.5	9.06	17.9	14.6	21.3	68.5	2308	10.7	24.6	48.7
149	113	6.92	10.5	10.4	9.31	31.1	567	14.6	29.2	44.1
202	122	8.82	8.82	8.98	47	66.7	655	14.3	33.7	47
85.1	70.4	12.4	11.4	10.6	23.9	47.8	906	13.7	37.2	43.3
28.1	20.2	6.49	466	129	24.8	75.7	1731	11.7	16.8	8.66
77	71.7	23.1	86.6	40	59.9	93.9	813	21.9	52.8	77
34.9	36.2	82	426	122	41.4	87.4	799	12.5	34.6	59.9
37.2	25.7	78.4	150	53.3	10.8	25.9	437	9.14	26.4	40.7
95.6	200	8.98	9.14	9.14	43.3	83.5	1928	10.9	34.6	57.8
117	98.2	7.64	195	36.8	19.8	55.7	2187	24.4	74.3	195
55.7	42.6	10.1	71	39.6	24.6	66.1	1263	12.6	37.2	35.5
73	55.7	10.4	104	24.4	33.7	89	1778	13.2	51.9	77.7
26.7	17	6.98	14.2	13.5	30	43.7	514	22.5	63.8	80.6
52.3	52.8	6.92	13.2	1.64	20.7	40	799	11.7	42.2	66.7
121	106	1	149	12.5	19.1	42.6	638	11.1	37.9	45.3
76.4	82	33.7	38.9	20.5	11.7	38.5	1310	6.32	27.9	21.3
26.4	24.6	16.7	26.7	12.3	40	76.4	632	36.8	86.6	147
85.8	62.1	4.37	113	13.5	28.6	63.2	806	10.6	24.4	55.7
62.6	63.2	4.41	100	9.22	15.3	49.6	519	17	53.3	115
33.1	31.1	5.83	10.8	2.25	12.3	26.9	523	24.6	82	239
21.3	19.5	3.79	106	8.74	25.7	56.2	1640	20.2	43.3	138
137	122	2.13	181	9.91	34	68.5	1275	24.6	71	294
40.3	31.9	39.6	49.6	13.7	15.5	35.9	626	15.1	35.2	92.2
146	88.2	26.9	27.1	20.7	21.3	92.2	3718	14.5	38.9	50
35.9	25.3	2.11	181	13.8	19.3	54.7	799	11.7	27.6	55.2
98.2	68.5	26.2	93.9	61	12.9	36.2	874	9.73	31.3	40.3
33.4	26.9	7.7	6.73	11.9	11.2	28.6	947	9.06	32.5	47
39.6	26.2	7.43	12.6	1.01	25.9	67.3	2690	11.1	28.6	58.3
164	129	22.3	28.9	22.7	22.3	28.1	588	17.8	67.9	99.1
37.5	40	64.9	52.3	33.4	54.2	101	1027	23.9	67.3	269
31.1	21.9	2.94	150	11.8	18.1	34.6	939	9.39	23.1	45.3
37.5	23.9	13.3	17.3	5.38	31.9	77.7	2414	12.5	41.4	53.8
103	69.8	4.74	13.9	11.2	24.4	47.4	799	15.5	38.9	67.9
36.8	24.6	11	146	49.1	12	30	557	17.6	34.3	68.5
38.5	37.5	33.1	40.3	6.1	38.9	67.9	882	12.2	54.2	142
89	19.1	5.52	24.8	12.7	12.9	28.9	710	9.31	20	1.63
65.5	50.5	13.9	453	89.8	29.7	52.3	644	12.3	41.4	114
59.9	42.6	25.7	12.7	32.8	14.5	34.9	866	16.3	48.3	99.1
26.7	24.8	19.8	43.7	14.5	11.7	33.1	698	11.2	36.2	66.1
26.7	29.7	32.2	168	49.1	41.8	84.3	914	59.4	77.7	21.5
27.9	35.5	6.92	17.2	5.09	50	95.6	791	13	46.1	157
34	23.1	32.2	311	72.3	48.3	79.1	626	6.38	21.5	24.1
300	237	8.28	39.2	16.7	10	32.8	1075	17.3	54.2	93.9
44.9	45.7	4.66	40.7	5.38	17.2	34.6	679	12.9	32.2	56.2
77.7	46.1	80.6	737	77.7	11.1	32.8	567	12.9	42.9	85.1
35.5	23.3	6.92	18.9	25.3	10.5	35.9	828	11.9	34.9	45.3
35.2	26.9	2.59	127	28.6	32.5	52.3	791	11.5	34.3	53.8
50.5	44.1	10.9	13.8	4.45	10.4	34	583	17	62.1	248
37.5	34.3	5.83	12.7	11.8	11	35.5	777	43.3	103	379
23.7	15.5	7.91	72.3	26.9	27.9	65.5	799	9.22	34.6	30.8
54.7	43.7	5.23	253	37.9	18.9	36.2	562	12.1	34.3	48.3
29.4	30	38.9	308	41.8	25.9	69.8	1512	13.7	28.6	48.3
27.9	30.2	20.4	297	75	30	66.1	1155	13.5	26.7	64.9
20.5	19.6	13.3	45.7	28.9	34.6	66.7	723	6.85	24.8	44.9
20.9	14.6	5.73	99.1	10.6	19.1	39.2	764	26.7	62.1	73.7
32.2	32.5	21.9	183	61.5	41	60.4	542	14.1	42.2	73
102	84.3	18.9	25	15.3	26.9	76.4	1731	15.1	38.2	74.3
41	34.9	2.92	126	21.5	23.5	49.6	426	18.9	42.9	62.1
63.8	46.6	19.6	19.5	51.9	44.5	64.9	562	8.51	37.5	54.2
111	89	7.84	259	40	8.58	33.4	692	38.2	87.4	189
33.7	33.4	5.28	16.7	12.5	14.7	41.4	973	11.2	30.8	35.9
28.9	22.5	2.39	160	30.8	10.3	36.5	1747	13.8	66.1	102
41.4	31.3	2.74	221	36.8	29.2	84.3	2288	7.84	25.9	36.2
71	45.7	5.28	38.9	32.5	29.4	50.5	418	9.14	22.7	16.4
106	85.8	9.56	15.1	14.2	16.1	43.3	730	28.4	66.1	198
30.5	11.8	99.1	205	39.6	15.4	24.8	626	11.3	28.4	45.3
76.4	62.1	10.2	26.4	9.06	15.8	47.8	1084	28.1	67.3	111
24.1	17.6	3.34	139	25.5	27.6	50.5	673	42.6	105	123
99.1	117	18.8	101	20.7	16.1	45.7	1018	14.1	46.1	125
77.7	63.8	3.89	14.5	9.14	16.4	50	2035	8.51	29.4	58.3
24.8	26.9	10.6	8.35	11.5	53.3	173	5829	6.73	35.9	20.7
26.9	17.2	1.68	98.2	41	33.1	62.6	644	12.3	43.3	73
102	95.6	13.8	79.1	11.1	42.9	93.1	1762	8.35	25.5	53.3
30	18.8	4.07	308	72.3	22.1	40.3	743	7.84	27.4	45.7
58.8	57.8	1.46	130	21.5	45.7	76.4	1670	9.39	31.9	48.7
26.7	20	12.6	35.2	11.3	10.6	29.7	429	12.1	35.5	64.4
168	143	11.9	54.2	3.13	42.2	75.7	1241	10	23.9	49.6
47	40.7	23.3	528	77.7	15.4	42.9	449	8.82	34.9	45.3
40.7	20.5	12.1	150	13.7	40.3	63.8	704	8.51	13.2	41.4
67.3	57.8	2.25	27.1	9.39	23.5	51.4	1762	12.7	30.8	73.7
22.3	31.1	7.23	11.7	1	9.91	33.7	514	20.9	40	157
139	31.6	2.5	99.1	30	11.5	32.5	939	26.9	57.8	248
17.6	20.5	9.14	78.4	22.3	13.2	30.8	583	23.3	58.8	133
58.3	37.9	6.85	16.1	7.84	51.9	83.5	573	11.8	38.9	53.3
55.7	58.8	8.51	297	59.9	46.1	105	1382	23.9	60.4	250
31.1	23.9	7.1	76.4	16.4	25.3	50	528	10.3	42.2	50.9
32.8	25.7	10.6	18.6	4.33	24.8	49.1	806	11.3	21.5	35.9
40.3	25.9	2.35	93.9	14.5	10.9	38.5	1241	47.4	77.7	1
38.2	20.2	11.4	11.7	16.4	29.7	56.2	578	10.6	36.2	41.4
33.4	28.4	53.8	49.6	3.37	40.7	61.5	757	12.4	35.2	42.6
29.4	25.3	3.75	12.9	29.4	27.1	54.2	704	18.3	65.5	267
35.2	22.7	23.7	32.5	28.6	36.2	64.9	965	10.8	31.1	50
23.3	20.7	2.81	82	31.9	18.3	46.1	1310	9.39	21.5	87.4
19.6	26.4	6.15	11.7	2.27	3.68	12.6	48.3	15.1	30.5	45.3
19.8	25.5	7.5	69.8	17	23.7	77.7	3134	19.5	42.9	83.5
35.2	22.7	5.14	72.3	33.7	12.5	40.3	835	8.74	29.2	41.8
24.1	15.7	42.6	76.4	25	16.1	38.5	828	6.98	20.5	24.4
26.4	17.9	9.31	14.1	5.38	38.2	63.8	1037	15.3	21.9	52.8
25.9	25.9	19.8	271	34.3	55.7	75.7	562	16.1	47	170
29.7	32.2	7.7	6.98	14.1	15.8	50.5	710	19.5	72.3	132
38.5	24.8	6.55	11.3	1	12.7	50.9	1382	13.5	47.4	34.3
30.8	22.9	5.88	10.9	4.66	21.7	56.2	757	24.6	66.1	123
37.5	30.2	5.83	86.6	27.6	47.4	81.3	1322	6.1	31.3	39.2
23.7	12.3	1	154	16.4	46.6	78.4	717	13.8	40.7	78.4
110	73.7	5.52	114	41.8	30.5	71.7	1512	7.37	27.9	31.9
32.8	30	9.14	22.3	6.49	28.6	60.4	604	17.5	56.7	189
61	61	12.2	93.1	40.3	40	67.9	1540	11.8	25.7	67.3
48.7	32.5	43.7	106	41.8	7.91	34.6	843	1	54.2	8.2
28.4	27.1	7.99	9.47	1.01	58.8	104	799	20.4	50.5	120
108	89.8	7.99	94.7	40	24.4	55.2	588	11.7	31.9	71.7
63.2	47.8	18.3	16.3	4.83	17.5	33.4	770	11	30	47.8
37.5	35.5	18.1	13.9	12.5	11.3	47.4	2207	8.66	35.9	56.2
35.2	34.6	7.84	50.5	17	11.7	40	973	11	36.5	43.3
68.5	63.8	6.44	644	53.8	16.7	36.2	828	25.3	67.9	60.4
59.4	40	4.96	107	14.7	15.4	34.9	737	15.4	39.6	6.04
114	77	36.5	40	16.4	34.3	60.4	478	11.9	20.2	9.06
30.5	24.4	3.59	93.1	31.9	31.9	57.8	649	12.5	31.6	44.9
28.9	33.7	16	44.1	14.3	14.5	38.9	1334	14.9	26.4	113
35.2	30.5	10.3	16	1.76	14.1	37.2	685	11.5	34.3	82
38.2	19.6	16.8	20.5	18.1	33.1	58.8	1134	12.1	26.4	44.9
35.5	30.5	47.8	82.8	26.9	35.5	60.4	644	9.31	36.8	64.4
28.4	19.1	26.2	207	17.6	27.9	64.4	770	8.43	28.9	74.3
48.7	36.2	3.79	57.3	16.7	20.4	61	1526	9.65	35.2	50.5
88.2	57.8	51.9	32.8	23.1	19.6	55.2	1655	8.98	39.2	86.6
146	118	9.56	105	13.9	11.8	42.2	322	10.9	28.1	36.5
24.4	19.6	7.5	12.1	2.69	27.4	50.5	500	26.4	57.8	85.8
33.4	18.3	3.68	117	43.3	17.2	34	843	9.65	25	68.5
59.4	37.5	18.4	29.4	24.8	10.5	22.5	573	44.1	98.2	155
59.4	37.9	40.3	54.7	29.4	29.2	74.3	661	9.65	26.2	42.9
21.1	17.9	9.14	11.7	3.89	13.6	36.5	1197	12.2	27.1	44.5
32.2	16.7	11.9	143	14.7	41.8	48.3	661	31.1	75	244
112	94.7	4.29	110	22.3	16.3	44.1	1065	10.6	26.2	59.9
35.2	28.1	4.07	85.1	7.23	22.5	45.7	1134	13.7	47	69.2
42.6	39.2	16.3	19.3	6.21	6.92	29.7	355	20.7	50.5	71.7
36.5	26.9	23.9	445	67.9	27.1	73	1670	11.7	27.4	2.11
23.3	24.4	1	74.3	16.1	35.5	81.3	594	11	34.3	63.8
85.1	54.2	41	62.6	8.2	8.82	28.4	698	13.3	29.2	60.4
22.5	38.9	6.32	10.7	3	20.9	45.7	547	19.3	30.5	1
30.5	28.9	42.9	158	20.4	15.4	35.9	973	21.7	37.9	161
23.9	23.7	8.28	39.6	18.8	14.1	45.7	679	20.4	51.9	76.4
41.8	32.2	4.29	161	26.7	9.73	27.4	1219	25.9	61.5	250
29.4	33.7	5.99	70.4	24.8	10.7	28.6	483	24.6	87.4	161
31.6	18.6	31.6	50	38.5	58.3	83.5	743	10.1	34.6	61
54.2	46.6	8.58	13.2	7.1	16.8	70.4	1114	25.9	63.8	211
138	99.1	59.4	31.9	19.8	16	29.4	730	11	15.8	52.3
33.1	17.5	6.73	10.7	7.7	11.1	35.9	764	9.39	32.2	24.6
30	32.2	5	61	6.61	12.1	38.2	723	11.3	26.7	43.7
122	85.8	5.09	15.8	4.96	14.7	33.1	764	9.82	23.1	59.9
81.3	50.5	6.61	154	25	17.3	49.6	1046	19.5	46.1	96.5
26.4	16.8	5.57	53.3	22.7	12.6	36.5	604	16	37.2	71
29.7	29.4	8.28	18.6	2.29	9.06	42.9	1144	12.2	29.7	55.2
67.3	62.6	10.9	21.5	5.88	26.2	56.7	2091	20.9	44.1	77
27.9	30.8	1.95	151	6.55	20.4	50.9	973	11.8	37.2	55.7
110	114	67.9	96.5	30.5	25.7	63.2	1094	9.91	21.7	50
38.2	27.6	10.5	41.8	8.51	17.3	44.1	562	12.9	40	93.9
55.2	64.4	6.04	410	69.2	26.7	50	874	15.8	53.3	78.4
173	137	22.7	23.5	7.91	21.9	52.8	1155	9.65	19.5	34
48.3	33.7	15.1	26.7	1.35	18.6	45.7	667	11.3	36.2	130
30.8	19.8	6.92	7.43	6.32	18.6	49.6	931	26.2	55.7	103
28.1	20.7	35.2	67.3	12.2	18.1	41	743	27.6	64.9	85.1
38.5	30.8	8.51	37.9	10.8	25.7	51.9	533	18.3	48.3	46.6
28.6	17.6	42.6	58.8	42.9	18.8	44.1	567	9.31	34	64.4
26.4	18.8	6.85	17.2	16	23.1	37.2	588	10.9	35.2	41.4
31.6	35.9	2.67	88.2	18.4	39.6	71.7	514	8.43	27.9	40.3
17.8	16.3	5.28	21.1	10.3	27.6	50.5	638	10.3	34.9	50.5
31.3	20.9	47.8	138	34.9	28.9	57.8	890	52.8	67.9	5.23
176	154	5.88	8.66	6.79	27.1	63.8	737	19.6	58.8	117
33.1	23.7	5.28	129	16.7	40.3	82	698	9.91	42.9	64.4
32.8	23.7	5.99	5.78	1	9.73	17.3	191	23.7	59.4	121
101	82.8	79.9	403	125	25.7	44.5	655	36.5	94.7	276
32.8	20.2	39.2	33.1	32.5	21.5	46.6	466	11.9	30.5	47.8
34.3	23.3	19.8	19.3	5.78	28.6	53.3	1018	5.57	25.5	30.8
34	21.5	6.49	9.91	3.75	12.9	44.9	813	29.2	79.9	127
30.2	26.7	25	38.5	12.7	102	221	1715	13.1	45.7	153
35.2	28.4	9.39	8.06	11.5	16.4	49.6	2148	13.6	26.9	94.7
34.6	37.2	17.9	121	14.7	63.2	179	3106	9.39	23.7	38.5
47.8	50	10.3	12.3	3.13	22.9	57.3	922	23.1	47.8	155
44.1	31.6	7.7	106	16.7	20	38.2	982	11.2	31.3	30
75	47.8	4.66	163	10	47.8	79.9	784	31.6	82	325
67.3	53.8	2.19	6.73	3.25	50.5	61	931	18.9	47	66.1
37.2	26.9	29.4	34	33.4	20	57.3	1134	17	44.9	66.1
64.4	61	51.4	35.2	18.8	36.2	83.5	528	14.5	48.7	154
73	37.5	17.8	106	36.8	32.5	82	1762	13.2	37.5	61.5
93.1	51.4	6.61	108	26.9	13.6	40.3	698	34.3	102	352
90.6	79.1	7.04	17.2	7.84	26.7	58.8	737	9.65	20	57.8
36.2	22.3	2.17	56.2	14.3	18.6	42.6	898	11.2	30	65.5
29.4	26.2	28.4	77.7	19.5	25.9	57.8	710	10.8	23.3	28.4
46.6	51.9	10.9	6.85	11	19.6	51.4	858	6.1	48.3	46.1
30.5	31.9	50.9	118	54.2	14.7	55.7	2017	10.1	35.9	57.3
31.9	25.5	3.46	137	19.6	14.1	32.8	588	33.4	106	207
20.5	17.8	16.7	85.1	18.4	66.7	125	1582	6.85	25.9	41.4
23.1	20	1	77.7	29.2	50.5	83.5	704	14.2	31.1	41.8
20.7	28.4	1.91	118	10.5	34	64.9	655	19.1	45.3	88.2
146	89	38.2	115	18.8	20.5	45.3	1055	19.3	43.3	195
29.7	25	12.5	12.1	46.1	19.3	48.3	1000	13.9	41	63.2
44.5	22.1	11.7	562	77.7	22.9	47	757	14.7	37.2	50
22.3	18.8	50.5	76.4	42.9	17.8	43.3	914	7.84	31.9	66.7
36.5	20.4	7.99	12.7	12.9	19.3	37.9	588	22.5	56.2	106
62.6	40	1.25	188	37.5	34	67.3	1252	29.2	62.6	111
36.2	29.4	10.6	325	79.9	58.3	129	1459	11.1	30.5	45.3
50.9	38.9	108	400	137	43.3	79.1	1104	11	26.4	39.2
111	94.7	8.9	16.1	4.74	24.6	45.7	626	16.4	43.3	75.7
27.9	21.5	6.92	106	31.9	13.9	36.5	562	21.3	67.9	189
93.9	94.7	40.3	95.6	15.7	51.9	82	1046	10.1	33.4	38.5
48.3	37.2	54.7	135	75	26.2	59.9	1252	10.2	25.9	64.4
33.7	21.9	4.74	14.1	1.08	24.8	55.2	2072	23.5	71.7	107
106	71	9.91	5.57	13.6	17.2	46.1	764	16.3	31.1	57.3
85.1	73.7	41.4	83.5	23.1	12.3	42.2	1114	23.5	78.4	113
32.5	30.8	115	76.4	43.7	16.7	54.7	1685	13.1	20.4	55.7
81.3	71	37.9	331	60.4	10.3	45.7	1731	13.9	34.6	29.7
23.5	24.8	7.91	223	37.5	9.06	41	1877	9.47	35.2	43.7
215	231	36.8	37.5	20.7	30.2	67.3	1540	10.6	39.2	71
23.1	25	11	178	50	16.7	40.7	578	9.39	18.8	56.2
79.9	62.1	5.52	41.8	14.3	20.2	44.9	799	12.3	41.4	138
