# Supplementary material
Source: ML conference proceedings conference paper supplement (https://openreview.net/forum?id=nrbR2F29vU)
Supplement: supplementary_material [file Sachs_Nolan_Perturbation Data Sets_Final.doc]

Data files are stored as Excel Spreadsheets with columns as indicated in the headers. The stimulations used are as indicated in the Materials and Methods.

For the main result, the following conditions were used:

**Stimulation: File .**

1. CD3, CD28 cd3cd28.xls

2. CD3, CD28, ICAM-2 cd3cd28icam2.xls

3. CD3, CD28, akt-inhibitor cd3cd28+aktinhib.xls

4. CD3, CD28, G0076 cd3cd28+g0076.xls

5. CD3, CD28, Psitectorigenin cd3cd28+psitect.xls

6. CD3, CD28, U0126 cd3cd28+u0126.xls

7. CD3, CD28, LY294002 cd3cd28+ly.xls

8. PMA pma.xls

9. 2camp b2camp.xls

For the simulated western blots, the following were ALSO used, in addition to the 9 above:

**Stimulation: File .**

10. CD3, CD28, ICAM-2, akt-inhib cd3cd28icam2+aktinhib.xls

11. CD3, CD28, ICAM-2, G0076 cd3cd28icam2+g0076.xls

12. CD3, CD28, ICAM-2, Psitectorigenin cd3cd28icam2+psit.xls

13. CD3, CD28, ICAM-2, U0126 cd3cd28icam2+u0126.xls

14. CD3, CD28, ICAM-2, LY294002 cd3cd28icam2+ly.xls
